# Supplementary material for: Comparative transcriptome profiling of a resistant vs susceptible bread wheat (Triticum aestivum L.) cultivar in response to water deficit and cold stress
Source: PeerJ. 2021 May 12;9:e11428. doi: 10.7717/peerj.11428 (PMC8123233; doi:10.7717/peerj.11428)
Supplement: Supplemental Information 1 [file peerj-09-11428-s001.xlsx]

## Sheet: graph
	Supplementary matherial S1. Comparative characteristics of the moisture content of the substrate in an experiment to create water deficiency conditions
	normed on Hmax data:	mean	st.dev.	comment
	Hmax	1	0.0584855	* 5 min after watering
	Hmed	0.707741	0.0670367	* everyday mean minimum before next watering
	Henv	0.486771	0.0412733	* substrate humidity in container after 2 weeks w/o plants with water in the container pan
	Hdrought	0.397892	0.0322805	* humidity at end of drought experiment
	Hmin1	0.1574	0.025282	* minimal airdry humidity
	Hmin2	0.109756	0.00536072	* minimal humidity (dried at 200 C deg. at 2 hours)
