# Supplementary material for: Comparative transcriptome profiling of a resistant vs susceptible bread wheat (Triticum aestivum L.) cultivar in response to water deficit and cold stress
Source: PeerJ. 2021 May 12;9:e11428. doi: 10.7717/peerj.11428 (PMC8123233; doi:10.7717/peerj.11428)
Supplement: Supplemental Information 2 [file peerj-09-11428-s002.xlsx]

## Sheet: S2 - mapping results
Table S2
Summary for the STAR-mapping results of all libraries on the Triticum aestivum (iwgsc v1) genome
BioSample name	SRA	Line	Stress	Replica	Percent of all reads (%)	Number of input reads after filtration	Uniquely mapped reads (%)	of reads mapped to multiple loci (%)	of reads mapped to too many loci (%)	of reads unmapped: too short (%)	of reads unmapped: other (%)
S29_0h-2-1	SRR11671346	Triticum aestivum cv. Saratovskaya 29 (S29)	control	replica 1	6.59138	11507260	48.08	25.57	15.14	3.17	8.04
S29_0h-2-2	SRR11671344	Triticum aestivum cv. Saratovskaya 29 (S29)	control	replica 2	3.61294	6307494	41.51	24.18	18.27	5.49	10.56
S29_0h-2-3	SRR11671334	Triticum aestivum cv. Saratovskaya 29 (S29)	control	replica 3	3.17963	5551017	46.51	26.85	15.91	5.92	4.8
S29_24h-1-1	SRR11671329	Triticum aestivum cv. Saratovskaya 29 (S29)	cold 24 hour (+4C)	replica 1	3.71893	6492526	51.9	23.39	12.13	5.25	7.33
S29_24h-1-2	SRR11671328	Triticum aestivum cv. Saratovskaya 29 (S29)	cold 24 hour (+4C)	replica 2	3.65651	6383559	41.24	19.22	17.99	5.1	16.46
S29_24h-1-3	SRR11671327	Triticum aestivum cv. Saratovskaya 29 (S29)	cold 24 hour (+4C)	replica 3	4.44986	7768583	44.25	20.9	17.18	5.67	12
S29_6h-2-1	SRR11671326	Triticum aestivum cv. Saratovskaya 29 (S29)	cold 6 hour (+4C)	replica 1	4.28405	7479119	41.51	32.29	12.72	9.78	3.69
S29_6h-2-2	SRR11671325	Triticum aestivum cv. Saratovskaya 29 (S29)	cold 6 hour (+4C)	replica 2	2.93914	5131161	35.52	31.62	15.81	11.49	5.56
S29_6h-2-3	SRR11671324	Triticum aestivum cv. Saratovskaya 29 (S29)	cold 6 hour (+4C)	replica 3	3.12838	5461533	39.73	30.93	16.38	8.5	4.46
S29_WD-12	SRR11671323	Triticum aestivum cv. Saratovskaya 29 (S29)	water deficit	replica 1	2.79982	4887947	52.84	24.39	10.29	5.86	6.63
S29_WD-22	SRR11671343	Triticum aestivum cv. Saratovskaya 29 (S29)	water deficit	replica 2	3.71673	6488683	41.84	19.61	16.2	5.6	16.75
S29_WD-32	SRR11671342	Triticum aestivum cv. Saratovskaya 29 (S29)	water deficit	replica 3	5.32497	9296359	55.93	25.19	9.73	3.2	5.94
YP_0h-2-1	SRR11671341	Triticum aestivum cv.Yanetzkis Probat (YP)	control	replica 1	5.79979	10125303	55.23	28.23	9.2	2.92	4.42
YP_0h-2-2	SRR11671340	Triticum aestivum cv.Yanetzkis Probat (YP)	control	replica 2	3.77624	6592585	43.9	24.4	15.89	5.14	10.68
YP_0h-2-3	SRR11671345	Triticum aestivum cv.Yanetzkis Probat (YP)	control	replica 3	3.58493	6258586	48.09	27.02	13.5	5.71	5.68
YP_24h-1-1	SRR11671339	Triticum aestivum cv.Yanetzkis Probat (YP)	cold 24 hour (+4C)	replica 1	4.45281	7773746	49.2	23.32	16.36	5.58	5.54
YP_24h-1-2	SRR11671338	Triticum aestivum cv.Yanetzkis Probat (YP)	cold 24 hour (+4C)	replica 2	4.11884	7190690	41.85	20.22	19.46	5.44	13.03
YP_24h-1-3	SRR11671337	Triticum aestivum cv.Yanetzkis Probat (YP)	cold 24 hour (+4C)	replica 3	3.85549	6730930	47.4	23.84	16.22	6.16	6.39
YP_6h-2-1	SRR11671336	Triticum aestivum cv.Yanetzkis Probat (YP)	cold 6 hour (+4C)	replica 1	4.31236	7528545	33.17	31.96	17.67	8.85	8.35
YP_6h-2-2	SRR11671335	Triticum aestivum cv.Yanetzkis Probat (YP)	cold 6 hour (+4C)	replica 2	5.1939	9067534	41.27	35.17	12.26	7.04	4.26
YP_6h-2-3	SRR11671333	Triticum aestivum cv.Yanetzkis Probat (YP)	cold 6 hour (+4C)	replica 3	7.13283	12452532	43.52	31	11.73	8.53	5.21
YP_WD-12	SRR11671332	Triticum aestivum cv.Yanetzkis Probat (YP)	water deficit	replica 1	3.81875	6666791	50.06	24.14	12.64	5.98	7.17
YP_WD-22	SRR11671331	Triticum aestivum cv.Yanetzkis Probat (YP)	water deficit	replica 2	3.26658	5702808	46.19	22.19	15.21	5.5	10.91
YP_WD-32	SRR11671330	Triticum aestivum cv.Yanetzkis Probat (YP)	water deficit	replica 3	3.28513	5735199	58.4	26.84	7.86	3.07	3.82
					4.16667	7.27419e+06	45.7975	25.9363	14.4062	6.03958	7.82	AVERAGE
