# Supplementary material for: Comparative transcriptome profiling of a resistant vs susceptible bread wheat (Triticum aestivum L.) cultivar in response to water deficit and cold stress
Source: PeerJ. 2021 May 12;9:e11428. doi: 10.7717/peerj.11428 (PMC8123233; doi:10.7717/peerj.11428)
Supplement: Supplemental Information 3 [file peerj-09-11428-s003.xlsx]

## Sheet: S3 - fold change
Table S3
Summary for log2(Fold change) expression
For each gene, the significance of the change and the reliability (after Benjamini & Yekutieli) of the change in expression in stress
The expression values were calculated using the formula log2 (x / y) where
x - average value in stress (3 replica for line)
y - average value in control (3 replica for line)
value "-" in the cells means the gene does not change its expression reliably
	S29 water deficit / control		YP water deficit / control		S29_6h / control		S29_24h / control		YP_24h / control		YP_6h / control
Gene	log2(Fold change)	e_valu (after Benjamini & Yekutieli)	log2(Fold change)	e_valu (after Benjamini & Yekutieli)	log2(Fold change)	e_valu (after Benjamini & Yekutieli)	log2(Fold change)	e_valu (after Benjamini & Yekutieli)	log2(Fold change)	e_valu (after Benjamini & Yekutieli)	log2(Fold change)	e_valu (after Benjamini & Yekutieli)
TraesCS3B01G109600.1	9.65030484375527	0.0342203731594312	-	-	-	-	-	-	-	-	-	-
TraesCS4B01G122300.1	9.36764866064406	0.0388773811064012	-	-	-	-	-	-	-	-	-	-
TraesCS3D01G181700.1	9.31789503111478	0.0496941240799404	-	-	-	-	-	-	-	-	-	-
TraesCS7B01G168800.1	9.2996534063008	0.0344709587839932	-	-	-	-	-	-	-	-	-	-
TraesCS3A01G044400.1	9.17798699278107	0.0380151058213225	-	-	-	-	-	-	-	-	-	-
TraesCS4B01G348600.1	9.1524785583641	0.0342203731594312	-	-	-	-	-	-	-	-	-	-
TraesCS5B01G160900.1	9.08732590117128	0.0344709587839932	-	-	-	-	-	-	-	-	-	-
TraesCS1D01G360400.1	9.0399477619274	0.0496941240799404	-	-	-	-	-	-	-	-	-	-
TraesCS1B01G394100.1	8.96660106056824	0.0410745908653842	-	-	-	-	-	-	-	-	-	-
TraesCS2B01G430000.1	8.95659864344378	0.0328936468407485	17.9456493997774	0.0466977501007626	-	-	-	-	-	-	-	-
TraesCS4A01G038300.1	8.89120954703272	0.0388773811064012	-	-	-	-	-	-	-	-	-	-
TraesCS1D01G079100.1	8.69812999762087	0.0342203731594312	5.87887636192499	0.0277072266478419	-	-	10.7282256688359	0.0196927964425318	-	-	-	-
TraesCS4B01G301200.1	8.55627565480181	0.0342203731594312	-	-	-	-	-	-	-	-	-	-
TraesCS2D01G201100.1	8.4204989431795	0.0417868845539569	-	-	-	-	-	-	-	-	-	-
TraesCS7A01G442500.1	8.25438728130947	0.0172695567496184	-	-	-	-	-	-	-	-	-	-
TraesCS1B01G067300.1	8.03967179614653	0.0328936468407485	-	-	-	-	-	-	-	-	-	-
TraesCS3D01G441800.1	7.65110233114985	0.0399860064377858	-	-	-	-	-	-	-	-	-	-
TraesCS7B01G134500.1	7.60360753761433	0.0481911225413466	-	-	-	-	-	-	-	-	-	-
TraesCS1D01G187100.1	7.45570580086153	0.0347895485524288	-	-	-	-	-	-	-	-	-	-
TraesCS1B01G175600.1	7.44420802113003	0.0308034637194701	-	-	-	-	-	-	-	-	-	-
TraesCS6B01G235100.1	7.39609011992249	0.0328936468407485	-	-	-	-	-	-	-	-	-	-
TraesCS4D01G181800.1	7.346605390836	0.0483840055211946	-	-	-	-	-	-	-	-	-	-
TraesCS5D01G027500.1	7.3201694229265	0.0380151058213225	-	-	-	-	-	-	-	-	-	-
TraesCS6D01G235000.1	7.1361060750581	0.00895692457421663	-	-	-	-	-	-	8.78066040945096	0.0489013383752523	-	-
TraesCS3B01G321700.1	64.4872928129077	0.0347895485524288	-	-	-	-	-	-	-	-	42.92982300052	0.0350320403343966
TraesCS6B01G419800.1	6.98177475218504	0.0342203731594312	-	-	-	-	-	-	-	-	-	-
TraesCS3D01G084400.1	6.96517103907904	0.0275609534654979	-	-	-	-	5.99266741929832	0.0125446932335908	-	-	-	-
TraesCS3B01G285700.1	6.958389264262	0.0328936468407485	-	-	-	-	-	-	-	-	0.190790159412323	0.0422817126622635
TraesCS2B01G168300.1	6.93439918185932	0.0417868845539569	-	-	-	-	-	-	-	-	-	-
TraesCSU01G096900.1	6.92605792062936	0.00895692457421663	-	-	-	-	-	-	0.186015819827151	0.0345592844600655	-	-
TraesCS2D01G250300.1	6.91733490568311	0.0496941240799404	-	-	-	-	-	-	-	-	-	-
TraesCS4B01G084700.1	6.89561396459913	0.0423169685036013	-	-	-	-	-	-	-	-	-	-
TraesCS6A01G147300.1	6.89526417510781	0.0317938344184561	-	-	-	-	-	-	-	-	-	-
TraesCS2A01G547300.1	6.77936113141694	0.0435034018934829	-	-	-	-	-	-	-	-	-	-
TraesCS2B01G268600.1	6.73774381276025	0.0342203731594312	-	-	-	-	-	-	-	-	-	-
TraesCS2B01G479400.1	6.69637734028052	0.0496941240799404	-	-	-	-	-	-	-	-	-	-
TraesCS3A01G153000.1	6.69322890169359	0.00895692457421663	-	-	-	-	-	-	-	-	-	-
TraesCS5B01G120100.1	6.69160403750676	0.0328936468407485	-	-	-	-	-	-	-	-	-	-
TraesCSU01G158800.1	6.68912511709576	0.0435034018934829	-	-	-	-	-	-	-	-	-	-
TraesCS5B01G375500.1	6.60987520734809	0.0360703900690446	-	-	-	-	-	-	-	-	-	-
TraesCS2B01G532500.1	6.55053113970751	0.0380151058213225	-	-	-	-	-	-	-	-	-	-
TraesCS2B01G514900.1	6.50510416056606	0.0435034018934829	-	-	-	-	-	-	-	-	-	-
TraesCS1A01G330900.1	6.42891596893456	0.0336742933443082	-	-	-	-	-	-	-	-	-	-
TraesCS4B01G239900.1	6.37647095779156	0.0380151058213225	-	-	-	-	-	-	-	-	-	-
TraesCS3D01G528800.1	6.36243385594022	0.0336742933443082	-	-	-	-	-	-	-	-	-	-
TraesCS7D01G501500.1	6.30818965461079	0.0217004638435259	-	-	-	-	-	-	0.157900752380103	0.0389126205508311	-	-
TraesCS1A01G332400.1	6.21293531975915	0.0435034018934829	-	-	-	-	-	-	-	-	-	-
TraesCS4D01G133200.1	6.15828664747865	0.0342203731594312	-	-	-	-	-	-	-	-	-	-
TraesCS4A01G229600.1	6.1218337627421	0.0389330522902932	-	-	-	-	-	-	-	-	-	-
TraesCS2D01G133600.2	6.0338226383392	0.0453377820425085	-	-	-	-	-	-	-	-	-	-
TraesCS5B01G215300.1	51.7635420741231	0.038289777129735	-	-	-	-	-	-	-	-	-	-
TraesCS2A01G544700.1	5.96930325995118	0.0342203731594312	-	-	-	-	-	-	-	-	-	-
TraesCSU01G132200.1	5.91812608051817	0.0342203731594312	-	-	-	-	-	-	-	-	-	-
TraesCS1B01G171300.1	5.85693124532489	0.0435034018934829	-	-	-	-	-	-	-	-	-	-
TraesCS4A01G234100.1	5.79596399594722	0.0435034018934829	-	-	-	-	-	-	-	-	-	-
TraesCS3A01G253800.1	5.74525724016568	0.0328936468407485	-	-	-	-	-	-	-	-	0.143843871027812	0.00907149045120558
TraesCS6B01G298800.1	5.65021701490362	0.00895692457421663	7.04666094026091	0.044812760775888	-	-	-	-	-	-	-	-
TraesCS2D01G391700.1	5.62685386883923	0.0328936468407485	-	-	0.0701122304517268	0.0268612144083618	-	-	0.0575605994538325	0.0102318245320471	0.0258316375996423	0.00907149045120558
TraesCS5D01G142300.1	5.6105890263343	0.0342203731594312	4.5041557247709	0.0416582097857351	-	-	-	-	-	-	-	-
TraesCS4B01G153000.1	5.6077524225549	0.0417868845539569	-	-	-	-	-	-	-	-	-	-
TraesCS1A01G366500.1	5.60775242255489	0.0417868845539569	-	-	-	-	-	-	20.9470709288887	0.0328540681486297	-	-
TraesCS1A01G374200.1	5.60768888076672	0.0380151058213225	-	-	-	-	-	-	-	-	-	-
TraesCS3D01G325600.1	5.60438043741501	0.0496941240799404	-	-	-	-	-	-	-	-	-	-
TraesCS4B01G263700.1	5.60438043741501	0.0496941240799404	-	-	-	-	-	-	-	-	-	-
TraesCS3B01G490700.1	5.59261772795948	0.0336742933443082	-	-	-	-	-	-	-	-	-	-
TraesCS5B01G130300.1	5.58343489265373	0.0238931783840128	-	-	-	-	-	-	-	-	-	-
TraesCS2D01G063000.1	5.54571197229295	0.0417868845539569	-	-	-	-	-	-	15.6890692706594	0.00175041679211629	-	-
TraesCS5B01G009100.1	5.52990681375785	0.0464102523164623	-	-	-	-	-	-	-	-	-	-
TraesCS5A01G424600.1	5.47133525002265	0.0342203731594312	-	-	-	-	-	-	-	-	-	-
TraesCS7B01G140000.1	5.4330056677079	0.0494594049830052	-	-	-	-	-	-	-	-	-	-
TraesCS7A01G110500.1	5.42925747525345	0.0308034637194701	-	-	-	-	-	-	0.145304085494436	0.0455044982340495	0.0689605032326429	0.0363762627454591
TraesCS1D01G334100.1	5.37573145360632	0.0389330522902932	-	-	-	-	-	-	-	-	-	-
TraesCS3B01G009600.1	5.32954754901766	0.0397040089894287	-	-	-	-	-	-	-	-	-	-
TraesCS2D01G376300.1	5.29498061416113	0.0483840055211946	-	-	-	-	-	-	4.15775402599689	0.0110870585103699	-	-
TraesCS6B01G291400.1	5.23797739490882	0.0342203731594312	-	-	-	-	23.9953768041509	0.0125446932335908	-	-	-	-
TraesCS2A01G143500.1	5.23632295513802	0.0205012523199904	-	-	-	-	-	-	-	-	-	-
TraesCS5D01G136700.1	5.21250783728139	0.0347895485524288	-	-	-	-	-	-	7.78518731614946	0.0287157113283785	11.355552965139	0.0127255166139663
TraesCS2D01G393500.1	5.19681914420664	0.0417868845539569	-	-	-	-	-	-	-	-	-	-
TraesCS1B01G001700.1	5.18828220112213	0.038289777129735	-	-	-	-	-	-	-	-	-	-
TraesCS7B01G127300.1	5.16735389074413	0.0398286536789843	-	-	-	-	-	-	-	-	-	-
TraesCS2B01G584100.1	5.16569861600257	0.0360703900690446	-	-	-	-	-	-	-	-	-	-
TraesCS4A01G293700.1	5.15672143430473	0.0344709587839932	-	-	-	-	-	-	-	-	-	-
TraesCS1B01G157000.1	5.09440176783325	0.0435034018934829	-	-	-	-	-	-	-	-	0.232332087309258	0.00907149045120558
TraesCS3B01G324400.1	5.08890467685809	0.0308034637194701	-	-	-	-	-	-	-	-	-	-
TraesCS3B01G090400.1	5.06771272694539	0.0367271666468161	-	-	-	-	-	-	-	-	-	-
TraesCS6D01G172600.1	5.0394586255981	0.0496941240799404	-	-	-	-	-	-	-	-	-	-
TraesCS7B01G028700.1	5.01555344624371	0.0172695567496184	-	-	-	-	-	-	-	-	-	-
TraesCS5A01G506900.1	48.0704279266919	0.0328936468407485	-	-	11.1059401140484	0.0118325912178538	-	-	-	-	-	-
TraesCS6A01G023200.1	4.9783696797117	0.0275609534654979	-	-	-	-	-	-	-	-	-	-
TraesCS2A01G143300.1	4.96538997694194	0.0336742933443082	-	-	-	-	-	-	-	-	-	-
TraesCS3A01G108000.1	4.96197871500168	0.0344709587839932	-	-	-	-	-	-	-	-	-	-
TraesCS4A01G192900.1	4.92485650349499	0.0417868845539569	-	-	-	-	-	-	0.09022285214418	0.0389577438664969	-	-
TraesCSU01G234500.1	4.89887869299646	0.0342203731594312	-	-	-	-	-	-	-	-	-	-
TraesCS5A01G333500.1	4.89844377765912	0.0433154212012796	-	-	-	-	-	-	-	-	-	-
TraesCS5A01G183600.1	4.89844377765912	0.0433154212012796	-	-	-	-	-	-	-	-	15.6768203038439	0.025661097626676
TraesCS5B01G200900.1	4.88217200292727	0.0342203731594312	-	-	-	-	-	-	-	-	-	-
TraesCS7D01G481600.1	4.86424818340079	0.0447785364823709	-	-	-	-	-	-	-	-	-	-
TraesCS5A01G354300.1	4.82960913782328	0.0336742933443082	-	-	-	-	-	-	-	-	-	-
TraesCS6B01G211800.3	4.80185636359286	0.0342203731594312	-	-	-	-	-	-	-	-	-	-
TraesCS7A01G555900.1	4.73688395246644	0.0496941240799404	-	-	-	-	-	-	-	-	-	-
TraesCS2B01G563700.1	4.7304243043948	0.0342203731594312	-	-	-	-	-	-	-	-	-	-
TraesCS3A01G132300.1	4.69895404793232	0.0328936468407485	-	-	-	-	-	-	-	-	-	-
TraesCS3D01G056700.1	4.63548679626018	0.0453377820425085	-	-	-	-	-	-	-	-	-	-
TraesCS1B01G283700.1	4.62804680689398	0.0417868845539569	-	-	-	-	-	-	-	-	-	-
TraesCS4B01G045700.1	4.56759279379543	0.0328936468407485	-	-	-	-	-	-	-	-	-	-
TraesCS2B01G276300.1	4.53717395561814	0.0328936468407485	-	-	-	-	-	-	-	-	-	-
TraesCS5A01G177700.1	4.51357915729152	0.038289777129735	-	-	-	-	-	-	-	-	-	-
TraesCS1D01G223000.1	4.51317927571639	0.0344709587839932	-	-	-	-	-	-	0.126592041116985	0.029248939060833	-	-
TraesCS5D01G233200.1	4.48159043031192	0.0142747700327701	-	-	-	-	-	-	-	-	-	-
TraesCS4B01G241400.1	4.4780777913853	0.0362615195502939	-	-	-	-	-	-	-	-	-	-
TraesCS2D01G148700.1	4.47311626297464	0.0344709587839932	-	-	-	-	-	-	-	-	-	-
TraesCS3B01G132900.1	4.45251768385797	0.0362615195502939	-	-	-	-	-	-	-	-	-	-
TraesCS2A01G167300.1	4.44037299569844	0.00895692457421663	5.87720070209925	0.0277072266478419	-	-	-	-	-	-	-	-
TraesCS1A01G406300.1	4.42230523146339	0.0362615195502939	-	-	-	-	-	-	-	-	-	-
TraesCS5A01G513600.1	4.42153704090599	0.0336742933443082	-	-	-	-	-	-	-	-	-	-
TraesCS6B01G152000.1	4.36942363097998	0.0417868845539569	-	-	-	-	-	-	-	-	-	-
TraesCS7D01G099300.1	4.36600313563025	0.0494594049830052	-	-	-	-	-	-	-	-	-	-
TraesCS3A01G231900.1	4.32967023751794	0.0328936468407485	-	-	-	-	-	-	-	-	-	-
TraesCS6B01G294200.1	4.32926939766392	0.00895692457421663	-	-	-	-	-	-	-	-	-	-
TraesCS3A01G066600.1	4.32498626060625	0.0377613078570048	-	-	-	-	-	-	-	-	-	-
TraesCS7A01G430800.1	4.30971530409716	0.0417100147762509	-	-	-	-	-	-	-	-	-	-
TraesCS4A01G078200.1	4.30275161418629	0.0417868845539569	-	-	-	-	-	-	-	-	-	-
TraesCS1A01G319500.1	4.29720837852971	0.0336742933443082	-	-	-	-	-	-	-	-	-	-
TraesCS6A01G351300.1	4.29600122675854	0.0496941240799404	-	-	-	-	-	-	-	-	-	-
TraesCS7D01G023600.1	4.26301920839729	0.0483840055211946	-	-	-	-	-	-	-	-	-	-
TraesCS7A01G053800.1	4.25414205496895	0.0388773811064012	-	-	-	-	-	-	-	-	-	-
TraesCS4B01G209600.1	4.23874143627701	0.0435034018934829	-	-	-	-	-	-	-	-	-	-
TraesCS5B01G413800.1	4.2290553369154	0.0379916191870962	-	-	-	-	-	-	-	-	-	-
TraesCS7D01G485300.1	4.20943852403625	0.0399860064377858	-	-	-	-	-	-	-	-	-	-
TraesCS5B01G394100.1	4.16506349134378	0.0308034637194701	-	-	-	-	-	-	-	-	0.197153599133907	0.0454643300178649
TraesCS7D01G442900.1	4.16212995984593	0.0483840055211946	-	-	-	-	-	-	-	-	-	-
TraesCS1D01G288800.1	4.13502816572049	0.0380151058213225	-	-	-	-	-	-	32.9381735532344	0.00174253264138839	-	-
TraesCS4B01G062900.1	4.13203104781146	0.0344709587839932	-	-	-	-	-	-	-	-	-	-
TraesCS1D01G325300.1	4.12871129248073	0.0336742933443082	-	-	-	-	-	-	-	-	-	-
TraesCS3A01G390000.1	4.11025199741166	0.0480359722575234	-	-	-	-	-	-	0.0882192045144847	0.0265239114693184	-	-
TraesCS7B01G276300.1	4.1029886526466	0.038289777129735	-	-	-	-	-	-	-	-	-	-
TraesCS7B01G191400.1	4.08824562066294	0.040895012767802	-	-	7.71870476690016	0.0109191887852675	5.83071603021666	0.0339153722526781	-	-	-	-
TraesCS5B01G224400.1	4.08716591626524	0.0328936468407485	-	-	-	-	-	-	-	-	-	-
TraesCS3D01G193200.1	4.08559640529781	0.0377613078570048	-	-	-	-	-	-	-	-	-	-
TraesCS1A01G249500.1	4.07696938868105	0.0309766752044097	-	-	-	-	-	-	-	-	-	-
TraesCS5A01G163600.1	4.06144934689565	0.0342203731594312	-	-	-	-	-	-	-	-	-	-
TraesCS4A01G053700.1	4.00706720833908	0.0362813547300968	-	-	-	-	-	-	-	-	-	-
TraesCS3D01G141100.1	26.7645105116169	0.0342203731594312	15.7404580016008	0.0416582097857351	-	-	-	-	-	-	-	-
TraesCS3A01G340800.1	26.1058007626977	0.0344709587839932	-	-	-	-	-	-	-	-	-	-
TraesCS4B01G107100.1	23.0007697171111	0.0496941240799404	-	-	-	-	-	-	-	-	-	-
TraesCS3B01G322100.1	22.6078619316041	0.0342203731594312	31.5911811234277	0.0277072266478419	-	-	-	-	-	-	-	-
TraesCS3D01G287000.1	21.4407117226429	0.0435034018934829	-	-	-	-	-	-	-	-	23.0192072737471	0.0388427679697416
TraesCS7B01G411400.1	21.2711693973641	0.0417868845539569	-	-	-	-	-	-	-	-	12.3088297553869	0.0356562675554146
TraesCS1D01G094700.1	20.8832783358989	0.0417868845539569	-	-	-	-	-	-	-	-	-	-
TraesCS7A01G456500.1	19.4731229992484	0.0406313493702247	10.4540785887413	0.0344265044668765	-	-	-	-	-	-	-	-
TraesCS3B01G322200.1	19.4548702424884	0.0319466313049053	21.6567669894765	0.0340500406197101	-	-	-	-	-	-	4.81301647590106	0.0117559203625629
TraesCS7B01G065100.1	19.3027167643585	0.0142747700327701	-	-	-	-	-	-	-	-	-	-
TraesCS2A01G510400.1	19.2724286712933	0.00895692457421663	-	-	-	-	-	-	-	-	-	-
TraesCS2D01G372000.1	18.8058998759339	0.0342203731594312	-	-	-	-	-	-	-	-	-	-
TraesCS6A01G257600.1	17.4038672299633	0.0389330522902932	-	-	-	-	-	-	-	-	-	-
TraesCS3D01G097100.1	16.3832041990695	0.0142747700327701	-	-	-	-	-	-	-	-	-	-
TraesCS4B01G194200.1	16.2403788796152	0.0388773811064012	6.09608640411402	0.0466977501007626	-	-	-	-	-	-	-	-
TraesCS2B01G627900.1	15.9671985662132	0.0328936468407485	-	-	-	-	-	-	-	-	-	-
TraesCS5A01G064500.1	15.4239710435693	0.038289777129735	18.4900689503486	0.0416582097857351	-	-	-	-	-	-	-	-
TraesCS3D01G464200.1	15.2628128051505	0.0366965092344567	-	-	-	-	-	-	-	-	-	-
TraesCS4A01G177600.1	15.1300217444462	0.0308034637194701	-	-	-	-	-	-	-	-	-	-
TraesCS2B01G417000.1	15.0310001001156	0.0380151058213225	-	-	-	-	-	-	-	-	-	-
TraesCS6D01G162800.1	14.0604836252596	0.0496941240799404	-	-	-	-	-	-	-	-	-	-
TraesCS7D01G220700.1	13.8174809097429	0.0457981704175268	-	-	-	-	-	-	-	-	-	-
TraesCS3D01G412300.1	12.8366881397667	0.0344709587839932	6.30488160263749	0.0466977501007626	-	-	-	-	-	-	-	-
TraesCS4A01G251900.1	12.636136390155	0.0336742933443082	-	-	-	-	-	-	-	-	-	-
TraesCS3B01G014800.1	12.6270937897587	0.0496941240799404	-	-	-	-	-	-	-	-	-	-
TraesCS3D01G010600.1	12.430751274439	0.0342203731594312	-	-	-	-	-	-	-	-	-	-
TraesCS1D01G403300.1	12.1530990208743	0.0464102523164623	-	-	-	-	-	-	-	-	-	-
TraesCS6A01G253500.1	11.3655993532974	0.0328936468407485	9.28160648185347	0.0277072266478419	-	-	-	-	11.528650235614	0.00594226786612849	-	-
TraesCS3A01G416800.1	11.2687351292297	0.0344709587839932	-	-	-	-	-	-	-	-	-	-
TraesCS7D01G445200.1	10.929316586997	0.038289777129735	-	-	-	-	-	-	-	-	-	-
TraesCS4A01G339700.1	10.7780332231591	0.0447785364823709	-	-	-	-	10.7382460758129	0.0336329055562901	-	-	-	-
TraesCS2A01G300500.1	10.4684946073639	0.0328936468407485	-	-	-	-	-	-	-	-	-	-
TraesCS3D01G416400.1	10.4080352735248	0.0205012523199904	-	-	-	-	-	-	-	-	-	-
TraesCS2D01G364800.1	10.4036868792421	0.0496941240799404	-	-	-	-	-	-	-	-	-	-
TraesCS5A01G130400.1	10.3006990474021	0.0342203731594312	-	-	-	-	-	-	-	-	-	-
TraesCS1A01G076900.1	10.052188425442	0.0380151058213225	7.21826652260276	0.0320585926195474	-	-	9.10956756753478	0.0163998152496128	-	-	-	-
TraesCS6B01G143000.1	0.2483210161578	0.0272546816572542	-	-	-	-	-	-	-	-	-	-
TraesCS7D01G235100.1	0.246408577009536	0.0144184076650986	0.176886860015823	0.0214810535746348	-	-	-	-	-	-	-	-
TraesCS2B01G507200.1	0.246318896055382	0.0272992514642486	-	-	-	-	-	-	-	-	10.2519609467264	0.0341633779848367
TraesCS2A01G581600.1	0.245999744281873	0.0493817252873371	-	-	-	-	-	-	13.4381781976317	0.00166803560424531	14.986245020858	0.0457333062646322
TraesCS1B01G136700.1	0.242067370145661	0.0144184076650986	-	-	-	-	0.112361946933339	0.0260244146982373	-	-	-	-
TraesCS4B01G360900.1	0.241570928159985	0.0186450908446966	-	-	-	-	-	-	14.7125899672303	0.0115936389799727	13.1986906947801	0.0153591536896383
TraesCS5A01G044400.1	0.237543281233945	0.0147175802468653	-	-	0.0378733590907412	0.0128231773903417	-	-	-	-	-	-
TraesCS2D01G113100.1	0.235002429602496	0.0444144592266328	-	-	-	-	-	-	-	-	-	-
TraesCS4A01G312600.1	0.231169965295508	0.0330975032397519	-	-	-	-	-	-	-	-	-	-
TraesCS3A01G438800.1	0.231156277389617	0.0234007035014723	-	-	-	-	-	-	-	-	-	-
TraesCS5D01G054900.1	0.227315030118229	0.0234007035014723	-	-	0.0230222269255849	0.0116682505464274	-	-	-	-	-	-
TraesCS3D01G115800.1	0.221062275701976	0.0328361860765875	-	-	-	-	0.213007511935895	0.0477469074625155	-	-	-	-
TraesCS6B01G227900.1	0.216648454792503	0.045434574700833	-	-	-	-	-	-	-	-	-	-
TraesCS7D01G354100.1	0.214521350801617	0.0470473419621081	-	-	-	-	-	-	-	-	-	-
TraesCS7A01G276400.1	0.21321456566101	0.0330975032397519	0.0965837111813416	0.0291485467677092	-	-	-	-	-	-	-	-
TraesCS5B01G407400.1	0.210235055738692	0.0330975032397519	-	-	-	-	-	-	-	-	-	-
TraesCS5B01G316400.1	0.209796339600752	0.0194328777325903	-	-	-	-	-	-	-	-	-	-
TraesCS5B01G202800.1	0.206381079090172	0.04152125777558	-	-	-	-	-	-	-	-	-	-
TraesCS5A01G257700.1	0.206105659421121	0.0112065981584507	-	-	-	-	-	-	-	-	-	-
TraesCS3B01G204300.1	0.202890300240359	0.0213575408519721	-	-	-	-	-	-	-	-	-	-
TraesCS1B01G268000.1	0.200062088908383	0.0352461215611717	-	-	-	-	-	-	-	-	-	-
TraesCS2D01G065200.1	0.197081390372647	0.0354902604146157	-	-	-	-	-	-	-	-	-	-
TraesCS7D01G040200.1	0.189796454567396	0.0144184076650986	-	-	-	-	-	-	-	-	-	-
TraesCS6A01G315500.1	0.189439178171943	0.0144184076650986	-	-	-	-	-	-	-	-	-	-
TraesCS3D01G483200.1	0.186906296274054	0.0194328777325903	-	-	-	-	-	-	-	-	-	-
TraesCS6D01G187800.1	0.183577598085049	0.0144184076650986	-	-	-	-	-	-	-	-	-	-
TraesCS5B01G275600.1	0.182152648448525	0.0330975032397519	-	-	-	-	-	-	-	-	-	-
TraesCS6B01G340300.1	0.179215696123193	0.0328361860765875	-	-	-	-	-	-	-	-	-	-
TraesCS6B01G075200.1	0.178611718330895	0.016416680871102	-	-	-	-	-	-	-	-	-	-
TraesCS3A01G290700.1	0.176702684566613	0.0255798414953626	-	-	0.0729964931912236	0.0234404371539141	-	-	-	-	-	-
TraesCS2B01G079400.1	0.173321560452274	0.0144184076650986	-	-	-	-	-	-	-	-	-	-
TraesCS5D01G472200.1	0.17264268247768	0.00243139561264556	-	-	-	-	-	-	-	-	-	-
TraesCS2A01G438200.1	0.172338710064787	0.0213575408519721	-	-	-	-	-	-	-	-	-	-
TraesCS3D01G027300.1	0.168924067751186	0.0330975032397519	-	-	-	-	0.0560784319872007	0.0356989198635811	-	-	-	-
TraesCS5D01G322200.1	0.165702236613186	0.0168637144618631	-	-	-	-	0.0509235330152598	0.0222026012654618	-	-	-	-
TraesCS1A01G035600.1	0.162207943307544	0.016416680871102	-	-	-	-	-	-	-	-	-	-
TraesCS2A01G066700.1	0.162103905089569	0.0213575408519721	0.17967878115125	0.00302710801423663	-	-	-	-	-	-	-	-
TraesCS7B01G415900.1	0.160429692739938	0.0114515509052612	-	-	-	-	-	-	-	-	-	-
TraesCS7D01G412900.1	0.156005513571092	0.0330975032397519	-	-	-	-	-	-	-	-	-	-
TraesCS5A01G401200.1	0.154749862171189	0.0255798414953626	-	-	-	-	-	-	-	-	-	-
TraesCS1B01G229000.1	0.15177799525606	0.0458587960871203	0.0574267169662056	0.00774178335114512	-	-	-	-	-	-	-	-
TraesCS2A01G066900.1	0.151442570659694	0.0144184076650986	-	-	-	-	-	-	-	-	-	-
TraesCS7B01G136000.1	0.151270850873076	0.0272992514642486	-	-	-	-	-	-	-	-	-	-
TraesCS5A01G185700.1	0.147716965640726	0.0316740460683903	-	-	0.102170777905228	0.0472383622476258	0.139533368863107	0.048581229876749	10.040732188802	0.00605201866081071	6.62834888430672	0.00790892384604951
TraesCSU01G009400.1	0.145349417021178	0.0428154809738751	-	-	-	-	-	-	-	-	-	-
TraesCS1D01G239000.1	0.143876999411815	0.0362998768438672	-	-	-	-	-	-	26.4188239897628	0.00447702565012627	74.6335620387031	0.0233193496769636
TraesCS6B01G347200.1	0.141995513325174	0.0489470034743528	-	-	-	-	-	-	87.1695240961069	0.00137550762775484	77.3279906868628	0.0392209188866081
TraesCS1B01G084700.1	0.141486628989629	0.0466894665091428	0.191668515539694	0.009333345555369	-	-	-	-	-	-	-	-
TraesCS7A01G196000.1	0.141031577863572	0.0385760012519516	-	-	-	-	-	-	-	-	-	-
TraesCS4D01G168800.1	0.141026444663297	0.00155805128784707	0.196218340686316	0.0142561777287429	-	-	-	-	-	-	-	-
TraesCS1A01G033200.1	0.140308852758503	0.0152864217606625	-	-	-	-	-	-	5.6119021402743	0.0319842901868671	-	-
TraesCS5A01G205500.1	0.13307197152088	0.0260335080158697	-	-	-	-	-	-	-	-	-	-
TraesCS2B01G533800.1	0.129205033325458	0.0194328777325903	-	-	-	-	-	-	-	-	-	-
TraesCS2D01G168800.1	0.127626942611581	0.0144184076650986	-	-	-	-	-	-	-	-	-	-
TraesCS1D01G013800.1	0.127387114084453	0.0144184076650986	-	-	-	-	-	-	-	-	-	-
TraesCS5B01G049200.1	0.122535040886087	0.0162774332504753	0.085587262291105	0.0373584202951047	0.0488676851539431	0.0223073972576315	0.00842425005797882	0.0244321603033969	0.0547398384621498	0.0388883361259109	0.078912715438644	0.034233702997617
TraesCS3B01G536200.1	0.122460401656371	0.0144184076650986	-	-	-	-	-	-	-	-	10.0867198328645	0.0420679170979079
TraesCS3D01G296800.1	0.121763654739977	0.0144184076650986	-	-	-	-	-	-	-	-	-	-
TraesCS7D01G126400.1	0.120839247037815	0.0272546816572542	-	-	-	-	-	-	-	-	0.0849325244884024	0.0278780095631471
TraesCS4D01G326500.1	0.115945331794084	0.0368451895852112	0.0659579229161475	0.00302710801423663	-	-	-	-	0.0533092500780928	0.00326330900066192	0.0878400960884051	0.00446542901494709
TraesCS7D01G518300.2	0.115018505288506	0.0330975032397519	-	-	-	-	-	-	-	-	-	-
TraesCS1A01G297400.1	0.112391734431993	0.0465012766752302	-	-	-	-	-	-	-	-	-	-
TraesCS7B01G448000.1	0.108129394871944	0.0222354912732859	-	-	0.197777140990541	0.0492500239631543	-	-	-	-	-	-
TraesCS6D01G248500.1	0.107776741900913	0.0144184076650986	-	-	-	-	-	-	-	-	-	-
TraesCS7D01G201600.1	0.107746419849166	0.0444144592266328	-	-	-	-	-	-	-	-	-	-
TraesCS2A01G067100.1	0.10265244925776	0.00608787449601466	0.212628761173949	0.00611807580265285	-	-	0.202009436409876	0.0244321603033969	-	-	-	-
TraesCS3B01G379200.1	0.102463760700326	0.00605283847256366	-	-	0.152472509093498	0.0139048118497604	0.141594199891677	0.0218570360023661	-	-	-	-
TraesCS1D01G294000.1	0.101948814339531	0.0255798414953626	-	-	0.0304812187719062	0.0299106689674914	-	-	-	-	-	-
TraesCS2B01G079200.1	0.100394757214962	0.0213575408519721	0.127533892741031	0.0359117592847402	-	-	0.143207647376289	0.0447345794027268	-	-	-	-
TraesCS2A01G542700.1	0.0982244594431813	0.0283689683577189	-	-	-	-	-	-	-	-	-	-
TraesCS2A01G235000.1	0.0982237491287915	0.0430567899932512	0.140609939335283	0.00611807580265285	-	-	-	-	-	-	-	-
TraesCS1A01G348500.1	0.0972604782434882	0.0328361860765875	-	-	-	-	-	-	-	-	-	-
TraesCS7A01G507700.1	0.0939491158057483	0.0328361860765875	-	-	-	-	-	-	-	-	-	-
TraesCS2A01G505500.1	0.0929398759867631	0.0301337654765753	-	-	-	-	-	-	-	-	-	-
TraesCS5B01G427600.1	0.0929030296460987	0.027567905783342	-	-	-	-	-	-	-	-	-	-
TraesCS2B01G038700.1	0.0915035183118716	0.00956128637124721	-	-	-	-	-	-	-	-	5.08837012070521	0.0283755012645947
TraesCS3A01G468100.1	0.0914366598446761	0.0144184076650986	-	-	-	-	0.2492366937701	0.0477469074625155	-	-	-	-
TraesCS3D01G536700.1	0.0846069827394053	0.0465012766752302	-	-	-	-	-	-	-	-	-	-
TraesCS2A01G209700.1	0.0827443791547055	0.0483355898902332	-	-	-	-	-	-	-	-	-	-
TraesCS2B01G110600.1	0.0818571107881101	0.00364409124172359	0.0681861958486236	0.038561046068108	0.225966335728331	0.0147630115503337	0.0404467740002318	0.0202059276076319	-	-	-	-
TraesCS4A01G033500.1	0.0797395329773538	0.0417340874396321	-	-	-	-	-	-	-	-	-	-
TraesCS7B01G449200.1	0.076448658048451	0.0144184076650986	-	-	-	-	-	-	-	-	-	-
TraesCS3D01G508800.1	0.0757947122925725	0.0144184076650986	-	-	0.0197494640667917	0.0147630115503337	0.0202563085275549	0.0222026012654618	-	-	-	-
TraesCS1D01G338100.1	0.075109565414969	0.0409174250371608	-	-	-	-	-	-	-	-	-	-
TraesCS5A01G262800.1	0.0736419825562483	0.0213575408519721	-	-	-	-	0.0326559557186473	0.0356989198635811	-	-	11.5588481724185	0.0232186720816771
TraesCS7D01G358200.1	0.0729453588944975	0.0192916258456483	-	-	-	-	-	-	-	-	5.5012999435544	0.0460317369260512
TraesCS2A01G583500.1	0.0727193497008631	0.00207928203731268	-	-	-	-	0.219663787569005	0.0474018995189708	7.15581815880839	0.0331046388057211	10.3583371753798	0.0234046210412734
TraesCS6A01G316700.1	0.071744011620269	0.0272992514642486	-	-	-	-	-	-	23.7300743756555	0.0130774393552774	-	-
TraesCS3B01G573800.1	0.0701651257355937	0.0112065981584507	-	-	-	-	-	-	-	-	-	-
TraesCS5B01G059900.1	0.0691583343655364	0.0144184076650986	-	-	-	-	0.0999663020689152	0.026852964410875	23.4719094364581	0.0113715230055488	-	-
TraesCS4A01G033600.1	0.0684370515184022	0.0144184076650986	-	-	-	-	-	-	-	-	-	-
TraesCS7A01G158200.1	0.0680228797304894	0.0194328777325903	-	-	0.131429861015238	0.0441742370968627	-	-	-	-	-	-
TraesCS1D01G428300.1	0.0674443000287707	0.0213575408519721	-	-	-	-	-	-	-	-	-	-
TraesCS7A01G528100.1	0.0658751378775224	0.0330975032397519	-	-	-	-	-	-	-	-	-	-
TraesCS7D01G055600.1	0.0653671921419519	0.011750393341184	-	-	0.0727145860259998	0.0186583197465714	0.021342271302344	0.0222026012654618	-	-	-	-
TraesCS4D01G285800.1	0.0615617050099415	0.0144184076650986	-	-	-	-	-	-	-	-	-	-
TraesCS1B01G440700.1	0.0581996389924346	0.0046167119625299	-	-	0.237393709057308	0.03324311401327	0.142748862637798	0.0356989198635811	-	-	-	-
TraesCS6D01G289800.1	0.0566429143224735	0.00956128637124721	-	-	0.0916752064191855	0.0250343100334908	0.0562050277919462	0.026852964410875	-	-	-	-
TraesCS1B01G136800.1	0.0560647740049706	0.0328361860765875	-	-	-	-	-	-	-	-	-	-
TraesCS3D01G536600.1	0.0556567955400774	0.00956128637124721	0.0498110966355386	0.0291485467677092	-	-	-	-	-	-	-	-
TraesCS7B01G350200.1	0.0517358849305635	0.0272546816572542	-	-	-	-	-	-	36.9066263146839	0.00260527226020816	-	-
TraesCS6A01G099000.1	0.0515204342948742	0.0154447044631238	-	-	-	-	-	-	-	-	-	-
TraesCS2B01G223100.1	0.0512943090324127	0.0398425913161954	-	-	-	-	-	-	-	-	-	-
TraesCS2D01G146800.1	0.049763270563538	0.0144184076650986	-	-	0.0662429569316375	0.0234404371539141	-	-	-	-	-	-
TraesCS3D01G513600.1	0.0489063846278561	0.00605283847256366	-	-	0.188590171142059	0.0116682505464274	-	-	-	-	-	-
TraesCS2A01G161700.1	0.0428399192780238	0.0144184076650986	-	-	-	-	-	-	56.9421901328895	0.0149433506385998	87.5703598828392	0.0234046210412734
TraesCS7B01G027700.1	0.0414161707291066	0.0330975032397519	0.161820530656882	0.0373584202951047	-	-	-	-	-	-	0.182580672895163	0.0320899078047612
TraesCS5D01G270400.1	0.0395477197636273	0.00155805128784707	-	-	0.200287573707122	0.0234404371539141	0.0511874682836368	0.0201553546309799	-	-	11.9946210386699	0.0474782826475362
TraesCS7A01G530600.1	0.0393538601107244	0.0422676738880382	-	-	-	-	-	-	-	-	-	-
TraesCS3D01G212000.1	0.0347310048552892	0.0144184076650986	-	-	-	-	0.108050367500609	0.0260244146982373	-	-	-	-
TraesCS5D01G235600.1	0.0337111894453486	0.00155805128784707	-	-	-	-	0.172846804332086	0.0244321603033969	5.34585071239984	0.0490284724183319	-	-
TraesCS7D01G439800.1	0.0330663644028567	0.00155805128784707	-	-	-	-	-	-	61.1593758722233	0.021001674221452	-	-
TraesCS7B01G418500.1	0.0317893544651577	0.0430567899932512	-	-	-	-	-	-	-	-	-	-
TraesCS7D01G197300.1	0.0292525249803321	0.0430567899932512	-	-	-	-	-	-	-	-	-	-
TraesCS2A01G143400.1	0.0282951325683458	0.0324416747774508	-	-	-	-	-	-	-	-	-	-
TraesCS6D01G083500.1	0.0272244010729193	0.0435585587956906	-	-	-	-	-	-	6.38559106675564	0.0162185049796424	-	-
TraesCS7D01G413400.1	0.0267774985523676	0.0144184076650986	0.0128119008216661	0.00302710801423663	-	-	-	-	-	-	0.243618078860912	0.0307630046445866
TraesCS2B01G187700.1	0.0154549277335358	0.00766018968724065	-	-	-	-	-	-	-	-	40.5079106127872	0.00616074897526604
TraesCS3A01G489400.1	0.015425054797535	0.00941452048661742	0.0576920916103169	0.0419956441929135	0.128482485265576	0.0224233530682679	0.165932800014667	0.026852964410875	-	-	-	-
TraesCS2A01G476000.1	0.0135017597966963	0.0144184076650986	-	-	0.0620561420774352	0.0234404371539141	0.0661125656341798	0.026852964410875	7.48148851053355	0.0294709302069041	-	-
TraesCS5A01G418400.1	0.0134348567703489	0.0166288297343408	-	-	-	-	0.0338535411858062	0.0356989198635811	-	-	-	-
TraesCS7A01G392200.1	0.0118884770374492	0.0144184076650986	0.0709204510976257	0.0291485467677092	-	-	-	-	-	-	-	-
TraesCS4D01G063900.1	0.00970660234508733	0.0144184076650986	-	-	-	-	0.103433428611299	0.0356989198635811	11.2760929686519	0.015428166375794	-	-
TraesCS4A01G017000.1	0.00934628271079692	0.00155805128784707	-	-	-	-	0.219897181811755	0.0244321603033969	-	-	-	-
TraesCS4A01G249700.1	0.00928543539007515	0.00155805128784707	-	-	-	-	0.099406748948919	0.0202059276076319	-	-	-	-
TraesCS5B01G312000.1	-	-	-	-	-	-	-	-	97.4870258377523	0.00585747667017575	-	-
TraesCS2A01G323200.1	-	-	-	-	-	-	961.240564575536	0.0490076877440979	-	-	-	-
TraesCS3B01G270700.1	-	-	-	-	-	-	95.9396348773085	0.0125446932335908	-	-	-	-
TraesCS7B01G084000.1	-	-	-	-	-	-	-	-	95.6913912242825	0.000912916048648661	-	-
TraesCS4B01G367400.1	-	-	-	-	-	-	92.6296893808394	0.0399989345332908	-	-	-	-
TraesCS3D01G451500.1	-	-	-	-	-	-	-	-	91.3880195328526	0.00896747638280194	-	-
TraesCS2D01G552700.1	-	-	-	-	-	-	-	-	-	-	9.98352221272082	0.0381551021774522
TraesCS4D01G186900.1	-	-	-	-	-	-	-	-	-	-	9.98084403190508	0.0154239208830208
TraesCS7D01G457000.1	-	-	-	-	-	-	-	-	-	-	9.96442089697491	0.0437227468100924
TraesCS5A01G220600.1	-	-	-	-	-	-	-	-	9.91990344465703	0.0398994356730067	-	-
TraesCS6A01G310400.1	-	-	-	-	-	-	-	-	-	-	9.9041987788505	0.0443507282477788
TraesCS7D01G387100.1	-	-	-	-	-	-	-	-	9.89716734825661	0.00584579221932179	-	-
TraesCS5D01G465200.1	-	-	-	-	-	-	-	-	9.88571661264693	0.0260102532312446	-	-
TraesCS4A01G094600.1	-	-	-	-	-	-	-	-	9.86876918263048	0.0343629411389552	-	-
TraesCS3D01G475000.1	-	-	-	-	-	-	-	-	9.84456756429016	0.00437357902283779	-	-
TraesCS5A01G050600.1	-	-	-	-	-	-	-	-	-	-	9.8314824243854	0.0422597465278134
TraesCS5A01G261900.1	-	-	-	-	-	-	-	-	9.82806180297167	0.0150020714790005	-	-
TraesCS4B01G020300.1	-	-	-	-	-	-	-	-	9.8255359053519	0.000737085763424642	-	-
TraesCS2A01G545800.1	-	-	-	-	-	-	-	-	9.80341636048835	0.0121349447579279	-	-
TraesCS7A01G337000.1	-	-	-	-	-	-	-	-	9.7695961735133	0.00152534136082309	-	-
TraesCS7A01G150100.1	-	-	-	-	9.75392170881077	0.022763357355643	-	-	-	-	-	-
TraesCS2B01G215800.1	-	-	-	-	-	-	-	-	-	-	9.73995912941493	0.00294517161556155
TraesCS4B01G203800.1	-	-	-	-	-	-	-	-	9.72131185053414	0.00984134096074567	-	-
TraesCS1D01G412700.1	-	-	-	-	-	-	9.71123502847348	0.0499358220017799	-	-	-	-
TraesCS1B01G440200.1	-	-	-	-	-	-	-	-	9.68656758656679	0.0304986251497827	-	-
TraesCS6A01G058500.1	-	-	9.67769939837772	0.0277072266478419	-	-	-	-	-	-	-	-
TraesCS1B01G407300.1	-	-	-	-	-	-	-	-	-	-	9.66223129251592	0.0181331453415731
TraesCS6A01G204800.1	-	-	-	-	-	-	-	-	9.64326149886185	0.0461133595105611	-	-
TraesCS1A01G295800.1	-	-	-	-	-	-	-	-	9.61720897952849	0.00693858836463676	-	-
TraesCS5D01G477100.1	-	-	9.57706144607761	0.0348167397536894	-	-	-	-	-	-	-	-
TraesCS7D01G199900.1	-	-	-	-	-	-	9.57410766626074	0.0476726593401367	-	-	-	-
TraesCS5D01G298700.1	-	-	-	-	-	-	9.55475835315381	0.0196927964425318	-	-	-	-
TraesCS7B01G183600.1	-	-	-	-	-	-	-	-	9.55426444177046	0.0115603211370935	-	-
TraesCS3A01G413700.1	-	-	-	-	-	-	9.94653944086641	0.0125446932335908	9.53908988409673	0.00105555674606598	-	-
TraesCS7B01G201700.1	-	-	-	-	-	-	-	-	9.50516730430182	0.00978751125853674	-	-
TraesCS6B01G249000.2	-	-	-	-	-	-	-	-	-	-	9.48549481352301	0.0132793651303268
TraesCS4D01G301400.1	-	-	-	-	-	-	-	-	9.46401471201006	0.0301540202464332	-	-
TraesCS7A01G255600.1	-	-	-	-	-	-	9.44462105154831	0.0393160979479719	-	-	-	-
TraesCS5A01G449400.1	-	-	-	-	-	-	-	-	-	-	9.44077144005606	0.0117559203625629
TraesCS5B01G157600.1	-	-	-	-	-	-	-	-	9.39278898950405	0.00782863661602452	-	-
TraesCS7B01G083300.1	-	-	-	-	-	-	-	-	-	-	9.39024346281361	0.0182704086041555
TraesCS7B01G423900.1	-	-	-	-	9.36217942318004	0.0452364082812489	-	-	-	-	-	-
TraesCS3B01G581700.1	-	-	-	-	-	-	-	-	9.35789038650671	0.00972624835215016	-	-
TraesCS1D01G094800.1	-	-	-	-	-	-	9.35164352930174	0.0446539443338653	-	-	-	-
TraesCS5A01G382400.1	-	-	-	-	-	-	9.30877292014421	0.0453998175402177	-	-	-	-
TraesCS4D01G331900.1	-	-	-	-	-	-	-	-	9.30297375078746	0.00264315891037037	-	-
TraesCS3B01G376500.1	-	-	-	-	-	-	9.24603215495278	0.0155442714538564	-	-	-	-
TraesCS3B01G016800.1	-	-	-	-	-	-	-	-	9.22745484776442	0.0287157113283785	-	-
TraesCS4A01G447600.1	-	-	-	-	-	-	-	-	9.17159509974572	0.0335467179286768	-	-
TraesCS7D01G173800.1	-	-	-	-	-	-	-	-	-	-	9.15867768672006	0.00569329448722153
TraesCS2A01G151800.1	-	-	-	-	-	-	9.14441938600734	0.0136695130324123	-	-	-	-
TraesCS4B01G100100.1	-	-	-	-	-	-	-	-	9.13752423013373	0.0194218751029487	-	-
TraesCS7D01G476700.1	-	-	-	-	-	-	-	-	9.12905233663943	0.0162185049796424	-	-
TraesCS7D01G159400.1	-	-	-	-	-	-	-	-	-	-	9.11597550985894	0.0132793651303268
TraesCS5B01G532300.1	-	-	-	-	-	-	-	-	9.07196037623149	0.0331046388057211	-	-
TraesCS5B01G403400.2	-	-	-	-	-	-	-	-	9.06971500254198	0.00543890887534337	-	-
TraesCS4A01G353500.1	-	-	-	-	-	-	-	-	-	-	9.06142965479073	0.0478470796318099
TraesCS2A01G432700.1	-	-	-	-	-	-	9.89486434751297	0.0338142222370757	9.05689283723173	0.0064643148468467	-	-
TraesCS6D01G250500.1	-	-	-	-	-	-	9.05460224591526	0.025757349503463	-	-	-	-
TraesCS3B01G372600.1	-	-	-	-	-	-	-	-	-	-	9.04219422033922	0.00733938821601144
TraesCS1A01G239300.1	-	-	-	-	-	-	9.03843390286741	0.0125446932335908	-	-	-	-
TraesCS7B01G084800.1	-	-	-	-	-	-	-	-	9.02568561036395	0.00824095950837318	-	-
TraesCS7D01G419300.1	-	-	-	-	-	-	89.4470277365466	0.0336182555857876	-	-	-	-
TraesCS7B01G120900.1	-	-	-	-	-	-	-	-	860.459579729996	0.0217034041101961	-	-
TraesCS3B01G524700.1	-	-	-	-	-	-	-	-	86.2286611717216	0.00174253264138839	-	-
TraesCS2B01G447600.1	-	-	-	-	-	-	-	-	829.580698618155	0.00564040891890888	-	-
TraesCS5D01G317400.1	-	-	-	-	-	-	-	-	82.669019676905	0.0181274329749199	-	-
TraesCS5D01G227400.1	-	-	-	-	-	-	-	-	82.5206330880844	0.0197009243973991	-	-
TraesCS7B01G308000.1	-	-	-	-	-	-	-	-	81.3363279129088	0.00207602473075528	-	-
TraesCS5A01G253200.1	-	-	-	-	-	-	-	-	8.96911633596308	0.0234285823096735	-	-
TraesCS2A01G542900.1	-	-	-	-	-	-	-	-	-	-	8.95501824558876	0.0341633779848367
TraesCS6A01G335100.1	-	-	-	-	9.73047144604623	0.0153923976377569	-	-	-	-	8.94479242331705	0.048185776307711
TraesCS1A01G384800.1	-	-	-	-	-	-	-	-	-	-	8.93233191799978	0.0117559203625629
TraesCS2B01G148000.1	-	-	-	-	-	-	-	-	8.91865034557737	0.025707946667977	-	-
TraesCS3D01G539900.1	-	-	-	-	-	-	-	-	-	-	8.87875116043096	0.0129339950389766
TraesCS7B01G152000.1	-	-	-	-	-	-	-	-	-	-	8.87419130851102	0.0301058694086324
TraesCS2D01G335300.1	-	-	-	-	-	-	8.84195008887739	0.0339153722526781	-	-	-	-
TraesCS6A01G000200.1	-	-	-	-	-	-	-	-	8.83435779241943	0.0309807390919667	-	-
TraesCS7D01G050800.1	-	-	-	-	-	-	-	-	8.82671575197828	0.0273079515627632	-	-
TraesCS3A01G374500.1	-	-	-	-	-	-	-	-	8.82136731623033	0.00490570989357769	-	-
TraesCS1D01G072900.1	-	-	-	-	-	-	-	-	8.79199888964445	0.0464326685891336	-	-
TraesCS5A01G063100.1	-	-	-	-	-	-	-	-	-	-	8.76193225543031	0.0215241832369633
TraesCS5D01G050100.1	-	-	-	-	-	-	-	-	8.75455511872684	0.0384364602005425	-	-
TraesCS6A01G306000.1	-	-	-	-	-	-	-	-	-	-	8.75161617220643	0.0489372533505533
TraesCS7A01G240200.1	-	-	-	-	-	-	-	-	-	-	8.75076192743826	0.00569329448722153
TraesCS4D01G356300.1	-	-	8.70061837832253	0.032544251554844	-	-	-	-	-	-	-	-
TraesCS7B01G327600.1	-	-	-	-	-	-	-	-	8.66882536687661	0.0130816284500154	-	-
TraesCS6D01G316600.1	-	-	-	-	-	-	-	-	-	-	8.6430853559631	0.0457333062646322
TraesCS3A01G244400.1	-	-	-	-	-	-	-	-	8.63769697222482	0.0245123621222673	-	-
TraesCS6D01G349000.1	-	-	-	-	-	-	-	-	8.5781088545297	0.0200489178987931	-	-
TraesCS1A01G134000.1	-	-	-	-	-	-	-	-	-	-	8.57679169212832	0.0409205290386985
TraesCS6D01G049100.1	-	-	-	-	-	-	-	-	8.57672641917323	0.0184600171553855	-	-
TraesCS6D01G202500.1	-	-	-	-	-	-	-	-	-	-	8.55482861745078	0.0381551021774522
TraesCS3D01G415400.1	-	-	-	-	-	-	-	-	8.55003437866374	0.00568630945605239	-	-
TraesCS3A01G167200.1	-	-	-	-	-	-	-	-	8.54619247315395	0.00664867912889201	-	-
TraesCS5D01G441300.1	-	-	8.54425713705676	0.0332913501367388	-	-	-	-	-	-	-	-
TraesCS2D01G540300.1	-	-	8.54425713705676	0.0332913501367388	-	-	-	-	-	-	-	-
TraesCS7A01G350400.1	-	-	-	-	-	-	-	-	8.53845092877745	0.00840804699862634	-	-
TraesCS7B01G211800.1	-	-	-	-	-	-	8.53808420398165	0.0394714814825615	-	-	-	-
TraesCS1A01G378000.1	-	-	-	-	-	-	-	-	8.52673412831907	0.00158555499437086	-	-
TraesCS6B01G272700.2	-	-	-	-	-	-	-	-	8.4913517313568	0.0170287460331535	-	-
TraesCS7B01G320500.1	-	-	-	-	-	-	-	-	8.47317883671952	0.0210923351880339	-	-
TraesCS5B01G166000.1	-	-	-	-	-	-	-	-	-	-	8.45045935589359	0.0185944272901074
TraesCS7D01G482600.1	-	-	-	-	-	-	8.43086637605868	0.026022322788417	-	-	-	-
TraesCS5A01G311100.1	-	-	-	-	-	-	-	-	8.40096236844422	0.0487677599435796	-	-
TraesCS7D01G491200.1	-	-	-	-	-	-	8.39684488176426	0.0497619677629455	-	-	-	-
TraesCS4B01G272400.1	-	-	-	-	-	-	8.3967509636706	0.0453998175402177	-	-	-	-
TraesCS1B01G022300.1	-	-	-	-	-	-	-	-	8.39596107068692	0.0380218269097155	-	-
TraesCS3B01G258400.1	-	-	-	-	-	-	-	-	8.35504096225518	0.0284098817955828	-	-
TraesCS7A01G477900.1	-	-	-	-	-	-	-	-	8.34575069536971	0.0198116587961556	-	-
TraesCS5A01G048400.1	-	-	-	-	-	-	8.33684408978953	0.0394714814825615	-	-	-	-
TraesCS5A01G445700.1	-	-	-	-	-	-	-	-	-	-	8.32535954100197	0.0274899833726071
TraesCS1A01G070400.1	-	-	-	-	-	-	-	-	-	-	8.32109834977279	0.0381911853594084
TraesCS1A01G404200.1	-	-	-	-	-	-	-	-	8.32010236554691	0.0126172278636607	-	-
TraesCS6D01G242000.2	-	-	-	-	-	-	-	-	8.28407029587783	0.00551243010316125	-	-
TraesCS7A01G424300.1	-	-	-	-	-	-	-	-	8.27556576578611	0.0396662692001439	-	-
TraesCS2D01G037600.1	-	-	-	-	-	-	-	-	-	-	8.2696911113512	0.013626533500678
TraesCS1D01G428600.1	-	-	-	-	8.26106596979211	0.0415917533940711	-	-	-	-	-	-
TraesCS1D01G052000.1	-	-	-	-	-	-	-	-	8.19817836907278	0.00693858836463676	-	-
TraesCS3B01G048800.1	-	-	-	-	-	-	-	-	8.19052622962772	0.00575883806382422	-	-
TraesCS2B01G218600.1	-	-	-	-	-	-	-	-	8.18260430192928	0.00166803560424531	-	-
TraesCS2D01G231100.1	-	-	-	-	8.14684135038551	0.0345420146416235	-	-	-	-	-	-
TraesCS1B01G386400.1	-	-	-	-	-	-	8.12799834114504	0.0339153722526781	-	-	-	-
TraesCS7A01G309700.1	-	-	-	-	-	-	-	-	8.1097940823905	0.00241101352650435	-	-
TraesCS5D01G012800.1	-	-	-	-	-	-	-	-	8.10267174412773	0.0156889169140226	-	-
TraesCS3D01G358700.1	-	-	-	-	-	-	-	-	-	-	8.0850832165702	0.0062222675844255
TraesCS2B01G311000.1	-	-	-	-	-	-	-	-	-	-	8.08454741309086	0.0360094827774831
TraesCS6A01G117200.1	-	-	-	-	-	-	-	-	-	-	8.02937574742719	0.0234046210412734
TraesCS6D01G143100.1	-	-	-	-	9.85963898496533	0.014401984965882	8.02314896376744	0.046519445793985	-	-	9.47029297646629	0.0262159796261525
TraesCS7B01G411200.1	-	-	-	-	-	-	8.02234836709013	0.0394714814825615	-	-	-	-
TraesCS7B01G130600.1	-	-	-	-	-	-	8.02006487433508	0.0155917140601223	-	-	-	-
TraesCS7D01G487600.1	-	-	-	-	-	-	-	-	8.01782649130477	0.0251291564914364	-	-
TraesCS4D01G081300.1	-	-	-	-	-	-	8.01531647950807	0.0450365869832523	-	-	-	-
TraesCS4D01G008500.1	-	-	-	-	-	-	-	-	8.00805612685754	0.0225572189650893	-	-
TraesCS3B01G375100.1	-	-	-	-	8.00197359086259	0.0188859660413204	-	-	-	-	-	-
TraesCS1D01G096400.1	-	-	75.3042769742132	0.0416582097857351	-	-	-	-	-	-	-	-
TraesCS2B01G447500.1	-	-	-	-	-	-	-	-	731.795992011118	0.00166803560424531	-	-
TraesCS7A01G272600.1	-	-	-	-	-	-	-	-	73.6432379727172	0.00917944733235941	-	-
TraesCS2A01G166600.1	-	-	-	-	-	-	-	-	73.0554367707139	0.00630152340782984	-	-
TraesCS3D01G368600.1	-	-	-	-	-	-	-	-	-	-	72.7336660478873	0.0486849909942661
TraesCS2A01G489500.1	-	-	-	-	-	-	-	-	70.6170061118035	0.035226974465682	-	-
TraesCS2B01G032000.1	-	-	-	-	-	-	-	-	-	-	70.439140166612	0.0130687172508306
TraesCS2D01G273100.1	-	-	-	-	-	-	-	-	7.99405451001327	0.00347861171549127	-	-
TraesCS7A01G196100.1	-	-	-	-	-	-	7.97634399806957	0.0362403170695699	-	-	-	-
TraesCS3A01G279100.1	-	-	-	-	-	-	-	-	-	-	7.96721512018656	0.00774753444603291
TraesCS7B01G275800.1	-	-	-	-	-	-	7.94555643122694	0.0409053191864903	-	-	8.31705444334044	0.0457333062646322
TraesCS2B01G592600.1	-	-	-	-	-	-	7.94383712360641	0.0177524673560073	-	-	-	-
TraesCS2D01G220200.1	-	-	-	-	-	-	-	-	-	-	7.9299456036254	0.022180711549017
TraesCS3D01G037900.1	-	-	-	-	-	-	-	-	7.92219275984746	0.00637731461743952	-	-
TraesCS2D01G097200.1	-	-	-	-	-	-	-	-	-	-	7.92009220300415	0.00485383800363963
TraesCS6B01G406300.1	-	-	-	-	-	-	-	-	8.60413074536293	0.0321987842120369	7.91667074060403	0.00627715275834745
TraesCS4A01G060900.1	-	-	-	-	-	-	-	-	7.90496713783571	0.0225348177933639	-	-
TraesCS5B01G426400.1	-	-	-	-	-	-	-	-	7.88703980402815	0.0119997470052981	-	-
TraesCS1A01G414600.1	-	-	-	-	-	-	-	-	7.88546868793379	0.0181955964222508	-	-
TraesCS7D01G322100.1	-	-	-	-	-	-	-	-	7.88388899698657	0.00501657360371437	-	-
TraesCS6A01G365500.1	-	-	-	-	-	-	-	-	7.85952076886663	0.0136279862931636	-	-
TraesCS3A01G342900.1	-	-	-	-	8.61979158620569	0.035020131482853	-	-	-	-	7.85420742931851	0.026140125169377
TraesCS1A01G278600.1	-	-	-	-	-	-	-	-	7.83340937646751	0.00299081231060481	-	-
TraesCS4B01G153700.1	-	-	-	-	-	-	7.80295646100077	0.0155442714538564	-	-	-	-
TraesCS3B01G433000.1	-	-	-	-	-	-	-	-	-	-	7.78296874148554	0.0186757650925433
TraesCS6B01G400500.1	-	-	7.76313036923144	0.0404415073818958	-	-	-	-	-	-	-	-
TraesCS1A01G186100.1	-	-	-	-	-	-	-	-	7.76223238215309	0.0409236082031102	-	-
TraesCS5B01G457000.1	-	-	-	-	-	-	-	-	9.81186352761363	0.020434208702214	7.76086397604574	0.0232992617031541
TraesCS7D01G435200.1	-	-	-	-	-	-	7.74552012485514	0.0320114540424679	-	-	-	-
TraesCS6A01G232200.1	-	-	-	-	-	-	-	-	-	-	7.71388038490674	0.0478470796318099
TraesCS3A01G446500.1	-	-	-	-	-	-	-	-	7.69477656894	0.0336598173895364	-	-
TraesCS7D01G107900.1	-	-	-	-	-	-	-	-	7.67517174531033	0.00874487871874207	-	-
TraesCS3A01G396100.1	-	-	-	-	-	-	-	-	7.65627339993502	0.00396257122588722	9.59023480606014	0.00954050071343529
TraesCS3D01G148000.1	-	-	-	-	-	-	-	-	7.65592602802799	0.020434208702214	-	-
TraesCS7B01G133300.1	-	-	-	-	-	-	-	-	7.62658294235794	0.0378120283262335	-	-
TraesCSU01G076400.1	-	-	-	-	-	-	-	-	-	-	7.54247663223093	0.0193122480506168
TraesCS4B01G037800.1	-	-	-	-	-	-	7.53766010252231	0.022205623595388	-	-	-	-
TraesCS3B01G457900.1	-	-	-	-	-	-	-	-	7.51992840341017	0.0059451625772824	-	-
TraesCS4D01G018500.1	-	-	-	-	-	-	-	-	7.51672113257936	0.0068169245646479	-	-
TraesCS6A01G273800.1	-	-	-	-	-	-	-	-	7.51426604557929	0.00637731461743952	-	-
TraesCS7A01G441900.1	-	-	-	-	-	-	7.46269124425343	0.0453998175402177	-	-	-	-
TraesCS3A01G239100.1	-	-	-	-	7.4384301583969	0.0260245837433786	-	-	-	-	-	-
TraesCS2A01G291000.1	-	-	-	-	-	-	-	-	-	-	7.4328765126622	0.00157890596634309
TraesCS5B01G372500.1	-	-	-	-	-	-	7.4296304434492	0.0446539443338653	-	-	-	-
TraesCS6A01G261100.1	-	-	-	-	-	-	-	-	-	-	7.42218436209858	0.00857384462161244
TraesCS6A01G257300.1	-	-	-	-	-	-	7.41053386160795	0.0446539443338653	-	-	-	-
TraesCS5B01G116100.1	-	-	-	-	-	-	-	-	7.39848957285795	0.00690820568993989	-	-
TraesCS3D01G238300.1	-	-	7.67693387261744	0.0277072266478419	-	-	-	-	7.39362652002493	0.0242745519557137	-	-
TraesCS5B01G184300.1	-	-	-	-	-	-	-	-	7.37659882649263	0.0121611730325056	-	-
TraesCS7D01G137900.1	-	-	7.3567846848458	0.0320954139588697	-	-	-	-	-	-	-	-
TraesCS7D01G491900.1	-	-	-	-	-	-	-	-	7.34198547844365	0.0130917133016758	-	-
TraesCS6A01G221000.1	-	-	-	-	-	-	-	-	7.3366436038307	0.0464405717417974	-	-
TraesCS2A01G218800.1	-	-	-	-	-	-	7.32633043858544	0.0435945445539847	-	-	-	-
TraesCS5D01G186200.1	-	-	-	-	-	-	7.30141946199436	0.0180873029514452	8.78578873124022	0.00589243927439218	-	-
TraesCS1D01G188000.1	-	-	7.29114693753072	0.0466977501007626	-	-	-	-	-	-	-	-
TraesCS5B01G471000.1	-	-	-	-	-	-	7.26934138642844	0.0453998175402177	-	-	-	-
TraesCS4A01G125500.1	-	-	-	-	-	-	-	-	7.26715933991099	0.0409281197157714	-	-
TraesCS1B01G276800.1	-	-	-	-	-	-	-	-	-	-	7.24769106924269	0.0387525543683187
TraesCS2D01G493500.1	-	-	-	-	-	-	-	-	7.24239222924701	0.00173775467954216	-	-
TraesCS6D01G164300.1	-	-	-	-	-	-	-	-	7.23605766066469	0.0145145291592803	-	-
TraesCS6D01G235400.1	-	-	-	-	-	-	7.22301460552137	0.0274273606458329	-	-	-	-
TraesCS1B01G201100.1	-	-	-	-	-	-	-	-	-	-	7.22017803055269	0.0182704086041555
TraesCS1D01G410200.1	-	-	-	-	-	-	-	-	7.21592895769426	0.0327052672080836	-	-
TraesCS2B01G181600.1	-	-	-	-	-	-	-	-	7.20002518136273	0.0084315432689041	-	-
TraesCS3A01G292000.1	-	-	-	-	-	-	-	-	-	-	7.19440973292122	0.0127255166139663
TraesCS6A01G123300.1	-	-	-	-	-	-	-	-	7.18693535795233	0.020434208702214	-	-
TraesCS2D01G180900.1	-	-	-	-	-	-	-	-	7.18353765382158	0.0464405717417974	-	-
TraesCS2A01G566700.1	-	-	-	-	-	-	7.18164978815498	0.0441457915195952	-	-	-	-
TraesCS3D01G329900.1	-	-	-	-	-	-	-	-	-	-	7.17105628529138	0.00925654707773609
TraesCS3D01G023800.1	-	-	-	-	-	-	-	-	7.17008824318154	0.0204705276968197	-	-
TraesCS5B01G383400.1	-	-	-	-	-	-	-	-	-	-	7.15730760275845	0.0460317369260512
TraesCS5A01G452700.1	-	-	7.15432637814347	0.0320585926195474	-	-	-	-	-	-	-	-
TraesCS1D01G333500.1	-	-	-	-	-	-	-	-	7.13564617765351	0.0261340188920705	8.58168811472739	0.021566462674323
TraesCS3B01G377300.1	-	-	-	-	-	-	-	-	-	-	7.12456922976576	0.0381551021774522
TraesCS2D01G224900.1	-	-	-	-	-	-	-	-	-	-	7.11907621889278	0.0184664932703313
TraesCS3D01G020600.1	-	-	7.11608474265255	0.0466977501007626	-	-	-	-	-	-	-	-
TraesCS1D01G310300.1	-	-	-	-	-	-	7.1140260372804	0.0409053191864903	-	-	-	-
TraesCS3D01G156100.1	-	-	-	-	-	-	-	-	-	-	7.11216324655459	0.0387525543683187
TraesCS3B01G441100.1	-	-	-	-	-	-	7.08501682088798	0.018331897383029	-	-	-	-
TraesCS2B01G275100.1	-	-	-	-	7.07119550419214	0.0103219633299842	-	-	-	-	-	-
TraesCS3B01G412500.1	-	-	-	-	7.06123069328848	0.0103219633299842	75.2120524519492	0.0402076394715881	-	-	-	-
TraesCS3B01G411300.1	-	-	-	-	-	-	7.05221118580701	0.0334673717509088	-	-	-	-
TraesCS4D01G102200.1	-	-	-	-	-	-	-	-	-	-	7.05061039000772	0.0131916419023259
TraesCS2A01G338800.1	-	-	-	-	-	-	-	-	-	-	7.026713421712	0.0449595097590981
TraesCS6D01G016100.1	-	-	-	-	-	-	-	-	-	-	7.02561852654532	0.0343139605137704
TraesCS7D01G265500.1	-	-	-	-	-	-	-	-	7.01689020341725	0.00528152672923659	-	-
TraesCS6A01G350600.1	-	-	-	-	-	-	7.0080247071125	0.0450365869832523	-	-	-	-
TraesCS1D01G034600.1	-	-	-	-	-	-	-	-	7.60308575508863	0.00479844025818112	7.00023628428476	0.022180711549017
TraesCS2A01G460600.1	-	-	-	-	-	-	-	-	68.4570815425061	0.00166803560424531	-	-
TraesCS7A01G430300.1	-	-	-	-	-	-	-	-	68.4283706925077	0.00527924595502556	-	-
TraesCS5D01G525700.1	-	-	-	-	-	-	-	-	67.7323930538713	0.00141290744652256	-	-
TraesCS5D01G413000.1	-	-	-	-	-	-	-	-	67.0344614990968	0.00664867912889201	83.7111645383027	0.0452294134037773
TraesCS3A01G347000.1	-	-	-	-	-	-	66.3049153742251	0.0302970554903044	-	-	-	-
TraesCS3A01G175400.1	-	-	-	-	-	-	-	-	657.470842294891	0.00907306272814848	-	-
TraesCS5D01G145400.1	-	-	-	-	-	-	-	-	-	-	65.8168572902679	0.027278096444281
TraesCS5D01G227600.1	-	-	-	-	-	-	-	-	64.3598977757676	0.0489013383752523	68.0530883825383	0.0457333062646322
TraesCS1A01G289900.1	-	-	-	-	-	-	-	-	63.4185647934766	0.00881294178472543	-	-
TraesCS6D01G348900.1	-	-	-	-	-	-	-	-	62.3282177285387	0.00194763961703454	-	-
TraesCS1B01G250900.1	-	-	-	-	-	-	-	-	-	-	60.6003105798887	0.0387525543683187
TraesCS1A01G314800.1	-	-	-	-	-	-	-	-	60.553796493804	0.00693858836463676	-	-
TraesCS5D01G444700.1	-	-	-	-	-	-	-	-	6.99544598010605	0.00413490637733008	-	-
TraesCS2A01G294600.1	-	-	-	-	-	-	-	-	-	-	6.99157714154574	0.00857402789789414
TraesCS3A01G422100.1	-	-	-	-	-	-	6.97150434548056	0.0290584576385055	-	-	-	-
TraesCS1A01G402500.1	-	-	-	-	-	-	-	-	6.97046653723709	0.0062853235683593	-	-
TraesCS2D01G563200.1	-	-	-	-	-	-	6.96723499080671	0.0218749711891463	-	-	-	-
TraesCS3B01G371200.1	-	-	-	-	-	-	-	-	6.96117633274324	0.0141303179618874	-	-
TraesCS6A01G266100.1	-	-	-	-	-	-	-	-	6.9501908128726	0.0120780889091417	-	-
TraesCS6B01G317100.1	-	-	-	-	-	-	-	-	6.93785280184037	0.0236335019124334	-	-
TraesCS5D01G557000.1	-	-	-	-	6.9355783186764	0.00990723528243655	-	-	-	-	8.05294219194314	0.00954050071343529
TraesCS4D01G275800.1	-	-	-	-	6.93517191003944	0.0194613273328226	-	-	-	-	-	-
TraesCS5D01G514700.1	-	-	-	-	6.92723814758562	0.0323173280485857	-	-	-	-	-	-
TraesCS2B01G326200.1	-	-	-	-	-	-	-	-	-	-	6.92382982333972	0.0432617898009275
TraesCS7A01G371400.1	-	-	-	-	-	-	-	-	6.90978049626047	0.0168315096034233	-	-
TraesCS7D01G421200.1	-	-	-	-	-	-	-	-	6.89344601359472	0.019453544756901	-	-
TraesCS1B01G314000.1	-	-	-	-	-	-	-	-	6.88972036754989	0.0282667981139683	-	-
TraesCS5B01G151000.1	-	-	-	-	-	-	-	-	-	-	6.88684021808488	0.00774753444603291
TraesCS5D01G485300.1	-	-	-	-	-	-	-	-	-	-	6.88446462347648	0.0219907561825045
TraesCS5D01G302700.1	-	-	-	-	-	-	7.57689980098569	0.0338142222370757	6.87412684565735	0.00573283230980264	-	-
TraesCS3B01G595200.1	-	-	-	-	-	-	-	-	9.2928504821479	0.0147136120378665	6.84424755581401	0.0234046210412734
TraesCS2B01G435900.1	-	-	-	-	-	-	-	-	6.84170994614559	0.0447914297533048	-	-
TraesCS7D01G456600.1	-	-	-	-	-	-	6.83824265554538	0.0230218376814561	-	-	-	-
TraesCS2B01G471800.1	-	-	-	-	-	-	6.8282685460968	0.0180873029514452	-	-	-	-
TraesCS1B01G347400.1	-	-	-	-	-	-	-	-	6.81964564504446	0.0250271763293816	-	-
TraesCS3A01G340700.1	-	-	-	-	-	-	-	-	-	-	6.80967260003989	0.0233828164538512
TraesCS5A01G052600.1	-	-	-	-	-	-	-	-	6.78863429420775	0.00551243010316125	-	-
TraesCS7A01G430500.1	-	-	-	-	6.78406852029804	0.0427256789467119	-	-	-	-	-	-
TraesCS5A01G008900.1	-	-	-	-	-	-	-	-	-	-	6.7677375556003	0.0107576813345976
TraesCS7A01G185500.1	-	-	-	-	-	-	6.73030820919895	0.0125446932335908	-	-	-	-
TraesCS5A01G375900.1	-	-	-	-	-	-	6.90966915231061	0.0211735477290387	6.72282159203517	0.0277820410362329	-	-
TraesCS5B01G227600.1	-	-	6.71752472248807	0.0447444584931607	-	-	-	-	-	-	-	-
TraesCS5A01G555100.1	-	-	-	-	-	-	6.697361232752	0.0177524673560073	7.1447072423939	0.00589243927439218	-	-
TraesCS5A01G533500.1	-	-	-	-	-	-	6.69545664921554	0.0446539443338653	9.18712531680045	0.00572937685463393	-	-
TraesCS7A01G182900.1	-	-	-	-	-	-	-	-	6.69412198415358	0.00664867912889201	-	-
TraesCS4A01G169500.1	-	-	-	-	-	-	-	-	6.67102378046283	0.0267530448149985	-	-
TraesCS7B01G101800.1	-	-	-	-	-	-	6.65689367771962	0.0453998175402177	-	-	-	-
TraesCS5D01G389300.1	-	-	-	-	-	-	6.64861800958787	0.0409053191864903	-	-	-	-
TraesCS6D01G355000.2	-	-	-	-	-	-	6.64333000001597	0.0163998152496128	-	-	-	-
TraesCS6D01G386300.1	-	-	-	-	-	-	-	-	6.62175227848382	0.0313193215665143	-	-
TraesCS1B01G197900.1	-	-	-	-	-	-	6.60136208968279	0.0288369930031447	-	-	-	-
TraesCS3D01G394200.1	-	-	-	-	-	-	-	-	-	-	6.59054242659562	0.0492841436903416
TraesCS1D01G254800.1	-	-	-	-	-	-	-	-	6.58098892716304	0.0122012452514294	-	-
TraesCS1A01G214000.1	-	-	-	-	-	-	6.57517039155845	0.0384494077740269	-	-	-	-
TraesCS3A01G286100.1	-	-	-	-	6.56509013501603	0.0355819552183196	6.66796052738022	0.0180873029514452	-	-	-	-
TraesCS4B01G302900.1	-	-	-	-	-	-	-	-	6.56011862414529	0.013787584137152	-	-
TraesCS6B01G309400.1	-	-	-	-	6.54379112848872	0.0236993370095488	-	-	-	-	7.02072438869372	0.031396397130241
TraesCS4A01G017200.1	-	-	-	-	-	-	-	-	-	-	6.53308208891642	0.015092062520778
TraesCS5D01G385400.1	-	-	-	-	-	-	-	-	6.51866487868057	0.0246206291674144	-	-
TraesCS3B01G406000.1	-	-	-	-	-	-	-	-	6.48924393140584	0.0465634088390625	-	-
TraesCS3B01G195600.1	-	-	-	-	-	-	-	-	6.47780554041728	0.00664867912889201	-	-
TraesCS5D01G455200.1	-	-	-	-	-	-	-	-	6.46182992034665	0.0438078490563847	-	-
TraesCS2B01G444500.1	-	-	-	-	-	-	-	-	6.46113043869002	0.0317935594848366	-	-
TraesCS7D01G207800.1	-	-	-	-	-	-	6.92005528707997	0.0496679289152439	6.79172593117672	0.0165682972336484	6.44768599512731	0.021566462674323
TraesCS5B01G370400.1	-	-	-	-	-	-	-	-	6.44524195753139	0.0318178695444121	-	-
TraesCS4D01G101900.1	-	-	-	-	-	-	-	-	6.44442955330043	0.00404907803727535	-	-
TraesCS5D01G173700.1	-	-	-	-	-	-	-	-	-	-	6.41680019524093	0.00485383800363963
TraesCS5B01G561000.1	-	-	6.40731666562801	0.0277072266478419	-	-	-	-	-	-	-	-
TraesCS7A01G549000.1	-	-	-	-	-	-	-	-	-	-	6.40086180256456	0.0387525543683187
TraesCS6B01G184400.1	-	-	-	-	-	-	-	-	6.37300493626422	0.0370868150467535	-	-
TraesCS6A01G162900.1	-	-	-	-	9.25964972505099	0.0344938353226865	-	-	6.36972664556391	0.0194691459367191	-	-
TraesCS2D01G207800.1	-	-	-	-	-	-	-	-	6.36900606706152	0.00481372712552154	-	-
TraesCS2B01G245300.1	-	-	-	-	-	-	-	-	-	-	6.3503204780436	0.0449595097590981
TraesCS5A01G323500.1	-	-	-	-	-	-	-	-	6.3418103073225	0.0459579451018902	-	-
TraesCS2D01G351700.1	-	-	-	-	-	-	6.34035615931362	0.0334673717509088	-	-	-	-
TraesCS1B01G219200.2	-	-	-	-	-	-	6.31146922770201	0.0435945445539847	-	-	-	-
TraesCS4A01G239800.1	-	-	-	-	-	-	-	-	6.30089495896721	0.036881707585337	-	-
TraesCS1A01G033500.1	-	-	-	-	-	-	-	-	6.29988326599929	0.0267340109218617	-	-
TraesCS7A01G449500.1	-	-	-	-	-	-	-	-	8.06868789291907	0.00732113692738512	6.29533122989966	0.0420679170979079
TraesCS2D01G351400.1	-	-	-	-	-	-	-	-	-	-	6.28396239675495	0.0492841436903416
TraesCS7B01G341900.1	-	-	-	-	-	-	6.28042378393653	0.0218163173919149	-	-	-	-
TraesCS6D01G328800.1	-	-	-	-	-	-	-	-	6.27919579470759	0.00589243927439218	-	-
TraesCS4A01G042700.1	-	-	-	-	-	-	-	-	6.27480259961667	0.00825130193772357	7.61516022749172	0.00954050071343529
TraesCS5A01G056500.1	-	-	-	-	-	-	-	-	6.27274190011791	0.00270717230437102	-	-
TraesCS2A01G152400.1	-	-	-	-	-	-	-	-	6.26871616704382	0.00630152340782984	-	-
TraesCS5A01G401600.1	-	-	-	-	-	-	-	-	-	-	6.25662229545421	0.0341432321930246
TraesCS2A01G104500.1	-	-	-	-	-	-	-	-	6.25000058518816	0.0117491978838195	-	-
TraesCS5D01G138100.1	-	-	-	-	-	-	-	-	-	-	6.24589166203747	0.0488452841197604
TraesCS1B01G180000.1	-	-	-	-	-	-	-	-	6.24544759244482	0.0320610869317217	-	-
TraesCS2D01G430700.1	-	-	-	-	-	-	-	-	6.2387894609141	0.0441009292004988	-	-
TraesCS1D01G442900.1	-	-	-	-	-	-	-	-	6.23877497735468	0.00347381092416469	-	-
TraesCS7B01G450100.1	-	-	-	-	-	-	-	-	6.22557294316067	0.0158904154196353	-	-
TraesCS4D01G001900.1	-	-	-	-	-	-	-	-	6.22538961028659	0.0338818862509689	-	-
TraesCS2D01G330200.1	-	-	-	-	-	-	-	-	-	-	6.22231891534263	0.0460317369260512
TraesCS1B01G117500.1	-	-	6.22231170302082	0.0454381085676546	-	-	-	-	9.99869706193851	0.00347381092416469	-	-
TraesCS7A01G427100.1	-	-	-	-	-	-	6.21980320707358	0.0393160979479719	-	-	-	-
TraesCS2B01G119100.1	-	-	-	-	-	-	6.19615408501664	0.0499358220017799	-	-	-	-
TraesCS6A01G389300.1	-	-	-	-	-	-	-	-	-	-	6.19552656545235	0.0332466101732124
TraesCS3D01G417800.1	-	-	-	-	-	-	-	-	6.18869236365198	0.00454189603301636	-	-
TraesCS3B01G472700.1	-	-	-	-	-	-	-	-	6.17064861716649	0.03837167385444	-	-
TraesCS1D01G186500.1	-	-	-	-	-	-	-	-	6.16174223607913	0.0341206168562513	-	-
TraesCS7B01G256700.1	-	-	-	-	6.15674499227947	0.0194258739662791	-	-	-	-	-	-
TraesCS4B01G118800.1	-	-	-	-	-	-	-	-	6.15592213389531	0.0234285823096735	-	-
TraesCS7B01G289200.1	-	-	-	-	-	-	-	-	6.15364326036167	0.00142911949979324	-	-
TraesCS6A01G376200.1	-	-	-	-	-	-	-	-	6.15241889620164	0.0136279862931636	-	-
TraesCS3D01G003900.1	-	-	-	-	-	-	-	-	6.14284977786897	0.0264466611725831	-	-
TraesCS1D01G388600.2	-	-	-	-	-	-	6.1373858683197	0.0454838791344166	-	-	-	-
TraesCS1D01G179900.1	-	-	-	-	6.13665414523468	0.0350669202435865	-	-	-	-	-	-
TraesCS6A01G217200.1	-	-	-	-	-	-	6.12513570543298	0.0379938710063221	-	-	-	-
TraesCS1A01G112600.1	-	-	-	-	-	-	-	-	6.11193244396603	0.00404907803727535	-	-
TraesCS7D01G156300.1	-	-	-	-	-	-	-	-	6.08327363082634	0.049328503163054	-	-
TraesCS5B01G001100.1	-	-	-	-	-	-	-	-	6.06816792320827	0.00664867912889201	-	-
TraesCS5A01G443300.1	-	-	-	-	-	-	-	-	6.06359260682214	0.0198432651644979	-	-
TraesCS3A01G365800.1	-	-	-	-	-	-	-	-	6.05831182144379	0.0084315432689041	-	-
TraesCS7B01G411800.1	-	-	-	-	-	-	6.04913323064564	0.0245476877527333	-	-	-	-
TraesCS6B01G047900.1	-	-	-	-	-	-	-	-	6.04239919489569	0.0292258765856628	-	-
TraesCS1D01G327100.1	-	-	-	-	7.18061192623598	0.0375369095859998	-	-	-	-	6.03779507342564	0.0117559203625629
TraesCS2A01G173400.1	-	-	-	-	-	-	-	-	-	-	6.03485350508198	0.0439292355076011
TraesCS4A01G402300.1	-	-	-	-	6.02827677277389	0.0487603558861442	-	-	-	-	-	-
TraesCS6D01G349300.1	-	-	-	-	-	-	-	-	6.02649841603877	0.00824095950837318	-	-
TraesCS3D01G330200.1	-	-	-	-	-	-	-	-	-	-	6.02341884207552	0.0232186720816771
TraesCS6A01G272700.1	-	-	-	-	-	-	-	-	-	-	6.02095443588885	0.00606604857967386
TraesCS5A01G263500.1	-	-	-	-	-	-	-	-	-	-	6.00328001390166	0.00867463924166319
TraesCS7A01G220100.1	-	-	-	-	-	-	-	-	6.00217319316035	0.00166803560424531	-	-
TraesCS7A01G174700.1	-	-	-	-	-	-	-	-	59.531794672738	0.00429319763829535	-	-
TraesCS5A01G403000.1	-	-	-	-	-	-	-	-	56.2588774413625	0.00624540066787126	-	-
TraesCS3D01G451400.1	-	-	-	-	-	-	-	-	56.084749700981	0.0133108677087452	-	-
TraesCS4D01G021000.1	-	-	-	-	-	-	-	-	53.7474692008392	0.000912916048648661	-	-
TraesCS3B01G361900.1	-	-	-	-	-	-	-	-	-	-	53.5075703229106	0.00651658134516364
TraesCS6D01G255000.1	-	-	51.5428780203173	0.0452236824583762	-	-	-	-	-	-	-	-
TraesCS6D01G307500.1	-	-	-	-	-	-	-	-	51.3277803932047	0.0317051073399029	-	-
TraesCS2D01G080400.1	-	-	-	-	-	-	51.1685595769238	0.0218163173919149	-	-	-	-
TraesCS7A01G213700.1	-	-	-	-	-	-	-	-	-	-	51.1357419057487	0.021566462674323
TraesCS4A01G263600.1	-	-	-	-	-	-	-	-	51.1165795307156	0.00454780433853787	83.4050756058489	0.0460317369260512
TraesCS4B01G291800.1	-	-	-	-	-	-	-	-	50.7712893979254	0.0186031909977299	-	-
TraesCS7D01G059700.1	-	-	-	-	-	-	-	-	50.5152627753662	0.039396722994403	-	-
TraesCS6B01G137700.1	-	-	-	-	-	-	-	-	5.98597015787221	0.00551301469983146	-	-
TraesCS3A01G224600.1	-	-	-	-	-	-	-	-	-	-	5.98332846031783	0.00279237221572177
TraesCS1B01G144300.1	-	-	-	-	-	-	-	-	5.95394542870515	0.0351617481824061	-	-
TraesCS3A01G336900.1	-	-	-	-	-	-	-	-	-	-	5.95094734114799	0.0358694406761428
TraesCS7D01G289200.1	-	-	-	-	-	-	-	-	5.94485713191322	0.0151296497215799	-	-
TraesCS4B01G393100.1	-	-	-	-	-	-	-	-	5.94388014166264	0.0416151461659297	-	-
TraesCS3B01G307300.1	-	-	-	-	-	-	-	-	5.94130009891002	0.00610392323927172	-	-
TraesCS6B01G077800.1	-	-	-	-	-	-	-	-	5.94058817095436	0.0206287341511029	-	-
TraesCS1D01G160800.1	-	-	-	-	-	-	-	-	5.93921422100874	0.00740555400663243	-	-
TraesCS5B01G133900.1	-	-	-	-	-	-	-	-	-	-	5.92857693558348	0.0460317369260512
TraesCS3B01G451900.1	-	-	-	-	-	-	-	-	5.92378756642639	0.0205421250062104	-	-
TraesCS1A01G078800.1	-	-	-	-	-	-	-	-	9.241859656041	0.00573283230980264	5.91620758054313	0.0228078676547592
TraesCS7D01G296300.1	-	-	-	-	-	-	5.91504613570866	0.0392227925598455	-	-	-	-
TraesCS6D01G190100.1	-	-	-	-	-	-	5.89867421810531	0.023257664074326	-	-	-	-
TraesCS2D01G117400.1	-	-	-	-	-	-	-	-	5.88172548360278	0.0338818862509689	-	-
TraesCS6D01G203000.1	-	-	-	-	-	-	-	-	5.88025841966375	0.00664329478441709	6.55732616039831	0.0087250406053276
TraesCS5D01G076400.1	-	-	-	-	-	-	-	-	5.87180288254798	0.0453120404267685	-	-
TraesCS5A01G363700.1	-	-	5.8694016128833	0.0416582097857351	-	-	-	-	-	-	-	-
TraesCS3B01G297200.1	-	-	-	-	-	-	-	-	-	-	5.86289434137027	0.0173271925017517
TraesCS6D01G212400.1	-	-	-	-	-	-	-	-	-	-	5.86162663845599	0.0387525543683187
TraesCS2D01G449400.1	-	-	-	-	5.85629454492781	0.0342426266163222	-	-	-	-	-	-
TraesCS1A01G212700.1	-	-	-	-	5.85018370100799	0.0149675023258195	-	-	7.93907202936637	0.00250701996697266	-	-
TraesCS4D01G219200.1	-	-	-	-	-	-	-	-	5.84659892636176	0.0122196408629219	-	-
TraesCS7A01G376800.1	-	-	-	-	-	-	-	-	5.84644632319608	0.00664867912889201	-	-
TraesCS4D01G006300.1	-	-	-	-	-	-	-	-	-	-	5.84463728696526	0.0234046210412734
TraesCS6D01G151900.1	-	-	-	-	-	-	-	-	-	-	5.83392168478415	0.0262159796261525
TraesCS6A01G252600.2	-	-	-	-	-	-	-	-	5.83277348942877	0.0124032011913368	-	-
TraesCS2D01G289800.1	-	-	-	-	-	-	-	-	5.83124890178579	0.0461133595105611	-	-
TraesCS6B01G384700.1	-	-	-	-	-	-	-	-	5.82884041550213	0.0229802308842913	-	-
TraesCS3D01G323100.1	-	-	-	-	-	-	5.8279163585614	0.0325920124428119	-	-	-	-
TraesCS3B01G079300.1	-	-	-	-	-	-	-	-	-	-	5.8173201569884	0.0460317369260512
TraesCS2D01G493600.1	-	-	-	-	-	-	-	-	5.81372467965855	0.00589243927439218	-	-
TraesCS6D01G301400.1	-	-	-	-	-	-	-	-	5.80754662717803	0.0059451625772824	-	-
TraesCS5D01G071000.1	-	-	-	-	-	-	-	-	5.79859548428655	0.0393001792403357	-	-
TraesCS4D01G034600.1	-	-	-	-	-	-	-	-	5.79490122163232	0.0237022589948686	-	-
TraesCS6D01G349200.1	-	-	-	-	-	-	-	-	5.7882293760223	0.0159713984367766	-	-
TraesCS7B01G026400.1	-	-	-	-	-	-	-	-	5.77286641418752	0.0334205139912702	-	-
TraesCS6A01G071100.1	-	-	-	-	-	-	-	-	5.77000201577802	0.00624540066787126	-	-
TraesCS3D01G256100.1	-	-	-	-	-	-	-	-	-	-	5.76711427092683	0.0175044331058495
TraesCS6A01G375800.1	-	-	5.76664082059049	0.0320585926195474	-	-	-	-	-	-	-	-
TraesCS7B01G228100.4	-	-	-	-	-	-	-	-	5.76030539856055	0.00476308385020163	-	-
TraesCS2B01G310300.1	-	-	-	-	-	-	5.75853485170253	0.0125446932335908	-	-	-	-
TraesCS2D01G097600.1	-	-	-	-	-	-	-	-	-	-	5.75837514255091	0.00883387740764994
TraesCS2D01G146500.1	-	-	-	-	-	-	-	-	5.75563515049697	0.0087642343306467	-	-
TraesCS1B01G351200.1	-	-	-	-	-	-	-	-	-	-	5.75395236403139	0.0486849909942661
TraesCS3B01G326600.1	-	-	-	-	-	-	-	-	-	-	5.75218763355188	0.022180711549017
TraesCS4D01G122900.1	-	-	-	-	-	-	-	-	5.75062817926271	0.0154441579651342	-	-
TraesCS6D01G338400.1	-	-	-	-	-	-	-	-	5.74954828664935	0.0313393705960397	-	-
TraesCS3B01G368200.1	-	-	-	-	-	-	5.74196220418508	0.0489839084962871	-	-	5.93881157232626	0.00790892384604951
TraesCS4D01G175100.2	-	-	-	-	-	-	-	-	5.73010856402171	0.00961045686257362	-	-
TraesCS2A01G193300.1	-	-	-	-	5.7295138376489	0.0127029137398836	-	-	-	-	-	-
TraesCS4D01G255800.1	-	-	-	-	-	-	-	-	5.72812623298429	0.00187757921911276	-	-
TraesCS7D01G367700.1	-	-	-	-	-	-	-	-	-	-	5.72426396059104	0.0243964436538404
TraesCS4B01G114600.1	-	-	-	-	-	-	-	-	5.72005998672683	0.0327052672080836	-	-
TraesCS2A01G314800.1	-	-	-	-	-	-	7.23357921925953	0.0288369930031447	5.71535980441172	0.0485948201485209	-	-
TraesCS4D01G206000.1	-	-	-	-	-	-	-	-	-	-	5.71463350096555	0.0282596467221808
TraesCS5B01G504900.1	-	-	-	-	-	-	-	-	5.69590320472648	0.00157542220979908	-	-
TraesCS1B01G452100.1	-	-	-	-	5.68887500055269	0.00764045543343918	-	-	-	-	-	-
TraesCS3B01G380400.1	-	-	-	-	-	-	-	-	5.68786926586176	0.0485427842522659	-	-
TraesCS6B01G246500.1	-	-	-	-	-	-	5.68225076904715	0.0125446932335908	5.90403739841631	0.00158555499437086	-	-
TraesCS3D01G276900.1	-	-	-	-	-	-	-	-	5.68169134624471	0.0282667981139683	-	-
TraesCS3B01G376300.1	-	-	-	-	-	-	-	-	5.67849655119542	0.0141303179618874	-	-
TraesCS7A01G455200.1	-	-	-	-	-	-	-	-	5.67496978253687	0.00141290744652256	-	-
TraesCS1B01G119000.1	-	-	-	-	-	-	5.65007051624087	0.0218163173919149	-	-	-	-
TraesCS7D01G335000.1	-	-	-	-	-	-	5.64844960618252	0.0339153722526781	-	-	-	-
TraesCS2A01G288800.1	-	-	-	-	-	-	5.64304436929432	0.0453998175402177	-	-	-	-
TraesCS4A01G071400.1	-	-	-	-	-	-	-	-	-	-	5.64131259647846	0.0462534812910807
TraesCS6B01G288600.1	-	-	-	-	-	-	-	-	-	-	5.62468125450507	0.0129339950389766
TraesCS4D01G228200.1	-	-	5.61566629204651	0.0447444584931607	-	-	-	-	-	-	-	-
TraesCS6D01G353500.1	-	-	-	-	-	-	-	-	5.6103718957308	0.0415919478121935	-	-
TraesCS1B01G277800.1	-	-	-	-	-	-	-	-	5.60704049149587	0.0353460317337285	-	-
TraesCS7A01G345500.1	-	-	-	-	-	-	-	-	5.59829184235359	0.00589243927439218	-	-
TraesCS1B01G187200.1	-	-	-	-	-	-	-	-	-	-	5.5873940964439	0.022180711549017
TraesCS2A01G158800.1	-	-	5.58698323053393	0.0340500406197101	-	-	-	-	-	-	-	-
TraesCS5D01G530800.1	-	-	-	-	-	-	-	-	5.58475204490439	0.0336275819858889	-	-
TraesCS7A01G277500.1	-	-	-	-	-	-	-	-	-	-	5.57882491153402	0.0293249095245269
TraesCS6A01G287700.1	-	-	-	-	-	-	-	-	5.57395791278058	0.0359660651909294	-	-
TraesCS3D01G236700.1	-	-	-	-	-	-	-	-	-	-	5.56438867341015	0.0469920147212769
TraesCS3A01G427500.1	-	-	-	-	-	-	-	-	5.56390906137399	0.0124032011913368	-	-
TraesCS2A01G227500.1	-	-	-	-	-	-	5.55490381842479	0.0138851326869752	-	-	-	-
TraesCS1D01G166600.1	-	-	-	-	-	-	-	-	5.55209247463821	0.00585747667017575	-	-
TraesCS2B01G319600.1	-	-	-	-	-	-	-	-	-	-	5.54138152732582	0.0310819675889022
TraesCS1D01G151500.1	-	-	-	-	-	-	5.53141122586598	0.0339153722526781	-	-	-	-
TraesCS5A01G225300.1	-	-	-	-	5.52520739195382	0.0249110981560451	-	-	-	-	-	-
TraesCS1D01G109100.1	-	-	-	-	-	-	-	-	5.52308873475612	0.00589243927439218	-	-
TraesCS3A01G392800.1	-	-	5.51896455216703	0.0454381085676546	-	-	-	-	-	-	-	-
TraesCS2D01G405500.1	-	-	-	-	-	-	-	-	-	-	5.51047229405082	0.00883387740764994
TraesCS2D01G528500.1	-	-	-	-	-	-	-	-	5.50366305783976	0.0284022081483182	-	-
TraesCS5D01G330500.1	-	-	-	-	-	-	-	-	5.50267794725482	0.00822417819900892	-	-
TraesCS3A01G108200.1	-	-	-	-	5.49285045539835	0.0188859660413204	-	-	-	-	-	-
TraesCSU01G017300.1	-	-	-	-	-	-	5.49063476574796	0.0177847121301592	6.33914250411086	0.00732513905769613	-	-
TraesCS7B01G279400.1	-	-	-	-	-	-	-	-	5.60728115281541	0.00568630945605239	5.47571386300338	0.0341432321930246
TraesCS2B01G247900.1	-	-	-	-	-	-	-	-	5.46957085562117	0.0209876445619001	-	-
TraesCS5A01G460500.1	-	-	-	-	-	-	-	-	-	-	5.46628477895731	0.0457838904668524
TraesCS6D01G344400.1	-	-	-	-	-	-	-	-	5.46535669497531	0.0118990363196576	-	-
TraesCS3A01G199000.1	-	-	-	-	-	-	5.45339700114644	0.0339153722526781	-	-	-	-
TraesCS6D01G003900.1	-	-	-	-	-	-	-	-	5.45017578220263	0.0495333505127067	-	-
TraesCS3A01G440900.1	-	-	-	-	-	-	-	-	5.44269269979028	0.0284022081483182	-	-
TraesCS5A01G491900.1	-	-	-	-	-	-	-	-	-	-	5.43755307320724	0.0242321963543779
TraesCS3B01G467900.1	-	-	-	-	5.61486594276573	0.0289306810458188	-	-	-	-	5.43683999474703	0.0184664932703313
TraesCS5A01G395200.1	-	-	-	-	-	-	-	-	5.43647729966287	0.0090070747341394	-	-
TraesCS5A01G196000.1	-	-	-	-	-	-	5.43639059068	0.0320114540424679	9.150211049908	0.0122196408629219	-	-
TraesCS6D01G069000.1	-	-	-	-	-	-	7.91613404571553	0.0339153722526781	7.21809269447295	0.00158702686787108	5.41921467000084	0.0481478940240072
TraesCS3D01G207900.1	-	-	-	-	-	-	-	-	5.41184924516088	0.0343629411389552	-	-
TraesCS4A01G319100.1	-	-	5.39660795733863	0.0340500406197101	-	-	-	-	-	-	-	-
TraesCS7D01G421100.1	-	-	-	-	-	-	-	-	5.39399492533876	0.0134941506128246	8.36885006612441	0.00968278565016904
TraesCS2B01G376800.1	-	-	-	-	-	-	9.14192393391638	0.0339153722526781	5.38879192816726	0.00732113692738512	-	-
TraesCS2B01G187400.1	-	-	-	-	-	-	5.38740117131263	0.0320114540424679	-	-	-	-
TraesCS3A01G288300.1	-	-	-	-	-	-	-	-	5.37747612832093	0.036881707585337	-	-
TraesCS7D01G483900.1	-	-	-	-	-	-	5.37732506594904	0.0125446932335908	-	-	-	-
TraesCS6A01G111600.1	-	-	-	-	-	-	-	-	-	-	5.37692605137458	0.0363400654375555
TraesCS6B01G056900.1	-	-	-	-	-	-	-	-	5.37632097229642	0.0119122805919432	-	-
TraesCS1A01G105400.1	-	-	-	-	-	-	5.37622429196512	0.0155442714538564	-	-	-	-
TraesCS1B01G198900.1	-	-	-	-	-	-	-	-	6.31761603048121	0.0197303311162995	5.3713659839168	0.0131916419023259
TraesCS1A01G182600.1	-	-	-	-	-	-	-	-	-	-	5.37049496673499	0.0243964436538404
TraesCS5A01G058600.1	-	-	-	-	-	-	5.36928548842627	0.023257664074326	-	-	-	-
TraesCS7D01G344700.1	-	-	-	-	-	-	-	-	5.35644889831258	0.0102743632992992	-	-
TraesCS7D01G517000.1	-	-	5.35377420745557	0.0416582097857351	-	-	-	-	-	-	-	-
TraesCS3D01G212100.1	-	-	-	-	-	-	5.35341769193311	0.0450365869832523	-	-	-	-
TraesCS1A01G372300.1	-	-	-	-	-	-	-	-	5.34412546770701	0.0194218751029487	-	-
TraesCS2D01G301300.1	-	-	-	-	-	-	5.33999780743598	0.0393160979479719	-	-	-	-
TraesCS2D01G422700.1	-	-	-	-	-	-	-	-	5.33612404411113	0.00664867912889201	-	-
TraesCS3D01G356900.1	-	-	-	-	-	-	5.33438468751823	0.00850820192334036	-	-	-	-
TraesCS4D01G337000.1	-	-	-	-	-	-	-	-	5.32847035737844	0.00158911257776955	-	-
TraesCS4D01G209100.1	-	-	-	-	-	-	5.32589622892186	0.0334673717509088	-	-	-	-
TraesCS5D01G408500.1	-	-	-	-	-	-	5.31637478737756	0.0453998175402177	-	-	-	-
TraesCS6A01G289600.1	-	-	-	-	-	-	-	-	5.29875411566094	0.0206827020859756	-	-
TraesCS2D01G281100.1	-	-	-	-	-	-	-	-	5.28803313648636	0.0103644090217661	-	-
TraesCS3D01G408000.1	-	-	-	-	-	-	5.28679833486533	0.015770812265353	9.33510068901936	0.00142911949979324	-	-
TraesCS2D01G596200.1	-	-	-	-	-	-	-	-	-	-	5.28396246614332	0.0363400654375555
TraesCS1A01G047000.1	-	-	-	-	-	-	5.28185679063855	0.043076858598645	5.77225558622586	0.00732113692738512	-	-
TraesCS1B01G316000.1	-	-	-	-	-	-	-	-	-	-	5.27961473319968	0.0103070778450617
TraesCS1D01G363500.1	-	-	6.79102144200109	0.0277072266478419	-	-	6.16727813800844	0.00850820192334036	5.27893076658075	0.0160898848709366	6.7805687063984	0.0225087374027793
TraesCS1A01G411600.1	-	-	-	-	-	-	5.27090166190429	0.0496675242682818	-	-	-	-
TraesCS2D01G147100.1	-	-	-	-	-	-	5.26333220316969	0.0320114540424679	-	-	-	-
TraesCS3A01G362200.1	-	-	5.26242781702207	0.0277072266478419	7.82743759776689	0.0344938353226865	-	-	-	-	8.80453338745141	0.0293827882323432
TraesCS2B01G556800.1	-	-	-	-	-	-	-	-	5.26122100575676	0.0163742291480795	-	-
TraesCS5D01G261000.1	-	-	-	-	-	-	-	-	5.23920854367974	0.0164678763668831	-	-
TraesCS3A01G396800.1	-	-	-	-	5.23616641713381	0.0109597897532408	-	-	-	-	-	-
TraesCS2A01G200700.1	-	-	-	-	-	-	-	-	-	-	5.23538180681622	0.00433075501680554
TraesCS4A01G276700.1	-	-	-	-	-	-	-	-	5.23378353804291	0.0234285823096735	-	-
TraesCS2A01G539400.1	-	-	-	-	-	-	-	-	5.23281130280627	0.00299081231060481	-	-
TraesCS3B01G149100.1	-	-	-	-	-	-	5.2321576454308	0.0453998175402177	-	-	-	-
TraesCS3D01G153500.1	-	-	-	-	-	-	5.22837913525985	0.0243399234995631	-	-	-	-
TraesCS2D01G454900.1	-	-	-	-	5.22026991924752	0.0149675023258195	-	-	-	-	-	-
TraesCS2D01G446900.1	-	-	-	-	5.21658291125834	0.0494142377434599	-	-	-	-	-	-
TraesCS3A01G042700.1	-	-	-	-	-	-	-	-	5.2132819370545	0.0416651103569503	-	-
TraesCS5D01G087900.1	-	-	-	-	-	-	5.21316679315978	0.0451388569793704	-	-	-	-
TraesCS7B01G238600.1	-	-	-	-	-	-	-	-	5.21202083668335	0.0207662410728672	-	-
TraesCS2D01G161700.1	-	-	-	-	-	-	5.21156366794672	0.046519445793985	-	-	-	-
TraesCS7D01G353100.1	-	-	-	-	-	-	-	-	5.20777465231163	0.00342129740009325	-	-
TraesCS5A01G049600.1	-	-	5.20327661351772	0.0320585926195474	-	-	-	-	-	-	-	-
TraesCS7A01G264500.1	-	-	-	-	-	-	-	-	5.2029636172898	0.00182783287183205	-	-
TraesCS2B01G287400.1	-	-	-	-	-	-	6.34297351112914	0.0130030605398438	5.19910614140869	0.00693858836463676	-	-
TraesCS4D01G340200.1	-	-	-	-	-	-	-	-	-	-	5.19866300559008	0.0117559203625629
TraesCS2D01G094200.1	-	-	-	-	-	-	-	-	-	-	5.19356742473138	0.0460480097891047
TraesCS4D01G210300.1	-	-	-	-	-	-	-	-	5.19054883787653	0.00166803560424531	-	-
TraesCS3D01G467600.1	-	-	5.1888450850304	0.0320954139588697	-	-	-	-	-	-	-	-
TraesCS6B01G438800.1	-	-	-	-	-	-	-	-	5.18806915545531	0.0221918314153243	-	-
TraesCS4D01G092000.1	-	-	-	-	-	-	-	-	-	-	5.18803509608547	0.0478941833855562
TraesCS7A01G266000.1	-	-	-	-	-	-	5.18383906740971	0.0125446932335908	-	-	-	-
TraesCS5A01G392900.1	-	-	-	-	-	-	-	-	5.18278036188659	0.00818206378266713	-	-
TraesCS3D01G141000.1	-	-	-	-	-	-	5.17419148661474	0.0382726752223491	-	-	-	-
TraesCS4D01G096400.2	-	-	-	-	-	-	-	-	5.16659901128226	0.00823012468339004	-	-
TraesCS7D01G466700.1	-	-	-	-	-	-	-	-	5.16548644419273	0.0324702717567759	-	-
TraesCS3B01G362900.1	-	-	-	-	-	-	-	-	5.1597007939285	0.00226156315654876	-	-
TraesCS2A01G222500.1	-	-	5.15520064717307	0.0466977501007626	-	-	-	-	-	-	-	-
TraesCS1A01G089500.1	-	-	5.15415789986155	0.0277072266478419	-	-	-	-	-	-	-	-
TraesCS2B01G229900.1	-	-	-	-	-	-	5.14321189521731	0.0490009838294765	-	-	-	-
TraesCS1D01G307200.1	-	-	-	-	-	-	5.14069162927583	0.026022322788417	-	-	-	-
TraesCS2B01G374700.1	-	-	-	-	-	-	5.1399421946304	0.0125446932335908	-	-	-	-
TraesCS4B01G396800.1	-	-	-	-	5.13903998968445	0.00764045543343918	-	-	-	-	-	-
TraesCS3A01G090100.1	-	-	-	-	-	-	-	-	5.13899744912398	0.0136279862931636	-	-
TraesCS1A01G391600.1	-	-	-	-	-	-	5.13857144303676	0.0290499543623116	-	-	-	-
TraesCS7D01G160400.1	-	-	-	-	-	-	-	-	5.12439626438216	0.0320610869317217	-	-
TraesCS4A01G012400.1	-	-	-	-	-	-	5.12245053115435	0.0125446932335908	8.97557315913901	0.00399655642272165	-	-
TraesCS1B01G159800.2	-	-	-	-	-	-	-	-	5.11312198455689	0.0119555933247043	-	-
TraesCS7B01G329000.1	-	-	-	-	-	-	-	-	-	-	5.1116533709006	0.0332466101732124
TraesCS1B01G372900.1	-	-	-	-	-	-	-	-	-	-	5.10599971892337	0.00569329448722153
TraesCS5D01G156300.1	-	-	-	-	-	-	5.10436738114844	0.0387693194055055	-	-	-	-
TraesCS7B01G077600.1	-	-	-	-	-	-	-	-	-	-	5.09921931688741	0.0332466101732124
TraesCS3A01G255300.1	-	-	-	-	-	-	-	-	-	-	5.09644707316059	0.00774753444603291
TraesCS6D01G219700.1	-	-	-	-	-	-	-	-	5.09381880901002	0.035097707135172	-	-
TraesCS2B01G302800.1	-	-	-	-	-	-	-	-	5.09142506401892	0.0109057164995692	-	-
TraesCS6B01G313400.1	-	-	-	-	-	-	-	-	-	-	5.08719654616601	0.0225109176183555
TraesCS3D01G277000.1	-	-	5.07466382804264	0.0320954139588697	-	-	-	-	-	-	-	-
TraesCS7D01G336000.1	-	-	5.05905706075021	0.0391007794769263	-	-	-	-	-	-	-	-
TraesCS7A01G355300.1	-	-	-	-	-	-	-	-	-	-	5.05654395579294	0.0384978477224741
TraesCS5D01G312200.1	-	-	-	-	5.05198930506076	0.0234625296855548	-	-	6.85795113062228	0.00824534247388162	-	-
TraesCS2B01G317600.1	-	-	-	-	-	-	-	-	5.70533377622691	0.0184600171553855	5.04480506084174	0.0375407350283352
TraesCS5B01G436400.1	-	-	-	-	-	-	-	-	5.03505566039712	0.00825130193772357	6.85379690128727	0.0437227468100924
TraesCS3B01G156900.1	-	-	-	-	-	-	-	-	5.03112915551738	0.0498241501835694	-	-
TraesCS3A01G363000.1	-	-	-	-	-	-	-	-	-	-	5.03056065954941	0.00294517161556155
TraesCS7B01G254000.2	-	-	-	-	-	-	-	-	-	-	5.0238047974005	0.0133340694852011
TraesCS1A01G421000.1	-	-	-	-	6.47207715610681	0.0149675023258195	-	-	5.01834259347425	0.00400907379648565	6.19537786724037	0.0115541294133184
TraesCS2A01G320400.1	-	-	-	-	-	-	-	-	5.01111956943378	0.0366956739465711	-	-
TraesCS2A01G101400.1	-	-	-	-	-	-	-	-	-	-	5.00927137528168	0.0175044331058495
TraesCS5A01G181800.1	-	-	-	-	-	-	5.56781392631406	0.0125446932335908	5.00601321637194	0.017254811991049	-	-
TraesCS1A01G290100.1	-	-	-	-	-	-	-	-	49.7371918001912	0.0121308063577932	-	-
TraesCS7A01G339900.1	-	-	-	-	-	-	-	-	-	-	49.7292278733272	0.0353892020557744
TraesCS3D01G325300.1	-	-	-	-	-	-	-	-	-	-	48.9562575877353	0.00294517161556155
TraesCS5A01G535300.1	-	-	-	-	-	-	-	-	48.5307758131502	0.00346149486256078	-	-
TraesCS7B01G330600.1	-	-	-	-	-	-	-	-	48.3175755511127	0.0100308203274686	-	-
TraesCS5A01G320300.1	-	-	-	-	7.98694546201131	0.0411147250884377	-	-	48.2112141025418	0.00194763961703454	-	-
TraesCS5B01G010300.1	-	-	-	-	-	-	-	-	474.209980182888	0.00818206378266713	-	-
TraesCS2B01G541900.1	-	-	-	-	-	-	-	-	471.99858880442	0.0245688437001432	-	-
TraesCS4A01G234200.1	-	-	-	-	46.8698282096944	0.0344938353226865	-	-	-	-	-	-
TraesCS4B01G328900.1	-	-	-	-	-	-	-	-	46.3302179400132	0.015869696437968	-	-
TraesCS4D01G197700.1	-	-	-	-	98.9955227546999	0.0149675023258195	-	-	455.088354200901	0.0090070747341394	-	-
TraesCS6A01G137400.1	-	-	-	-	-	-	-	-	45.8883885409859	0.0409281197157714	-	-
TraesCS2D01G425200.1	-	-	-	-	-	-	442.895869302244	0.0393160979479719	454.144489737579	0.00126593917782956	6.18447791110094	0.0476830200093297
TraesCS1B01G183500.1	-	-	-	-	-	-	-	-	-	-	44.1439419781266	0.0158671311637261
TraesCS3D01G103900.1	-	-	-	-	-	-	8.84802377298517	0.0412026239839115	43.9917765320422	0.0120809443443782	53.1665651000205	0.0420679170979079
TraesCS6D01G361400.1	-	-	-	-	-	-	7.78839132524031	0.0125446932335908	42.5102102087442	0.00226156315654876	-	-
TraesCS5A01G488500.1	-	-	-	-	-	-	-	-	42.442041422154	0.00232123959049718	-	-
TraesCS5D01G068800.1	-	-	-	-	-	-	-	-	41.7589531435247	0.00811284459745485	6.54416098964035	0.0489262673711532
TraesCS2A01G424800.1	-	-	-	-	-	-	-	-	41.7485935878856	0.00572937685463393	-	-
TraesCS2B01G236600.1	-	-	-	-	-	-	-	-	-	-	41.435575573503	0.031383787067906
TraesCS7A01G407800.1	-	-	-	-	-	-	-	-	41.3230233529053	0.017337367379465	-	-
TraesCS3A01G242600.1	-	-	-	-	-	-	40.0827758817642	0.0385463892133118	8.96074002460527	0.00572937685463393	-	-
TraesCS4A01G203900.1	-	-	-	-	-	-	-	-	-	-	4.99779088822948	0.046565033981922
TraesCS5D01G485500.1	-	-	-	-	-	-	4.9966201240944	0.0390710193648396	9.61403315474039	0.00351093054776107	-	-
TraesCS1D01G322100.1	-	-	-	-	-	-	-	-	4.99624078440217	0.0392545994944903	-	-
TraesCS6D01G281200.1	-	-	-	-	-	-	-	-	-	-	4.98738178601659	0.0147039886422055
TraesCS3B01G492900.1	-	-	-	-	-	-	-	-	-	-	4.98618586729338	0.0387525543683187
TraesCS1D01G015400.1	-	-	-	-	-	-	4.9839127001111	0.0489839084962871	-	-	-	-
TraesCS4D01G207500.1	-	-	-	-	-	-	7.68726246751961	0.0263100506084885	4.98371761000284	0.00861159813286294	-	-
TraesCS6A01G059600.1	-	-	-	-	-	-	4.97851783893691	0.0453998175402177	-	-	-	-
TraesCS6B01G321100.1	-	-	-	-	-	-	4.97346754138898	0.0177847121301592	-	-	-	-
TraesCS4D01G362900.1	-	-	-	-	-	-	-	-	-	-	4.96764689355007	0.0132793651303268
TraesCS3A01G256200.1	-	-	4.96521678608296	0.0471351081060858	-	-	-	-	-	-	-	-
TraesCS2A01G213200.1	-	-	-	-	-	-	4.9643328959783	0.0177524673560073	-	-	-	-
TraesCS7B01G336700.1	-	-	4.96262497565916	0.0466977501007626	-	-	-	-	-	-	-	-
TraesCS7B01G193200.1	-	-	-	-	-	-	-	-	4.95728564794587	0.00538456566435755	-	-
TraesCS2B01G440600.1	-	-	4.95104951239893	0.032544251554844	-	-	-	-	-	-	-	-
TraesCS6D01G388700.1	-	-	-	-	-	-	-	-	4.94202931566052	0.0331046388057211	-	-
TraesCS7D01G382700.1	-	-	-	-	-	-	4.93749656919386	0.0155442714538564	-	-	-	-
TraesCS5A01G305200.1	-	-	-	-	-	-	-	-	4.93640874920816	0.00178760295180901	-	-
TraesCS3A01G446200.1	-	-	-	-	-	-	-	-	4.93191917054435	0.00528152672923659	-	-
TraesCS5A01G131600.1	-	-	-	-	4.93050735577529	0.0344938353226865	-	-	-	-	-	-
TraesCS2A01G066400.1	-	-	-	-	4.92060462830619	0.0457019089950555	-	-	-	-	-	-
TraesCS5A01G263800.1	-	-	-	-	-	-	-	-	-	-	4.91419753650551	0.031396397130241
TraesCS6A01G327800.1	-	-	-	-	-	-	-	-	4.91100382175074	0.00907354512557511	-	-
TraesCS1D01G004500.1	-	-	4.91041192499763	0.0466977501007626	-	-	-	-	-	-	-	-
TraesCS5D01G417200.1	-	-	-	-	-	-	-	-	4.90979524864273	0.00572937685463393	-	-
TraesCS1D01G432400.1	-	-	-	-	-	-	-	-	9.28751794770125	0.00158911257776955	4.89740831206789	0.0387525543683187
TraesCS3D01G332800.1	-	-	-	-	-	-	-	-	4.88845009459321	0.0159713984367766	-	-
TraesCS5D01G440900.1	-	-	5.84620092367012	0.0277072266478419	-	-	-	-	-	-	4.88602889406628	0.025240190287023
TraesCS4B01G364800.1	-	-	-	-	-	-	4.8804717625096	0.0392227925598455	-	-	-	-
TraesCS6A01G222800.1	-	-	-	-	4.87879074033692	0.0188859660413204	-	-	-	-	-	-
TraesCS5A01G361100.1	-	-	-	-	4.87463059022089	0.0342426266163222	-	-	-	-	-	-
TraesCS3B01G311700.1	-	-	-	-	6.31619477706123	0.0127498043084084	4.87450787303954	0.0339153722526781	7.12001629783162	0.000776025272205398	6.55588086793972	0.0238171556365382
TraesCS4D01G057400.1	-	-	-	-	-	-	-	-	4.87135808871968	0.0126812383092289	-	-
TraesCS4D01G228900.1	-	-	-	-	-	-	-	-	4.87128246776424	0.0373741198637232	-	-
TraesCS5B01G448100.1	-	-	-	-	-	-	4.92234294183427	0.0136695130324123	4.86359218126104	0.0240411726557192	-	-
TraesCS1D01G081200.1	-	-	-	-	-	-	-	-	4.86132977647405	0.0194793961039696	-	-
TraesCS7B01G486800.1	-	-	-	-	-	-	-	-	4.86042800644486	0.0357600697915869	5.2789583766306	0.0237765975320195
TraesCS2A01G511000.1	-	-	-	-	-	-	-	-	-	-	4.84864716516614	0.00883387740764994
TraesCS6A01G325200.1	-	-	-	-	-	-	-	-	6.67983569323112	0.0090070747341394	4.84415769843857	0.0193908614328686
TraesCS5D01G326200.1	-	-	-	-	4.84093725177016	0.0342426266163222	-	-	68.7933458801467	0.00543890887534337	5.61766269040425	0.0130948610414928
TraesCS3B01G564200.1	-	-	-	-	-	-	-	-	4.84084721080183	0.00825261556026837	-	-
TraesCS6D01G097500.1	-	-	-	-	-	-	-	-	4.83539329181828	0.0070442387763837	-	-
TraesCS5B01G397800.1	-	-	-	-	-	-	-	-	7.52533097950079	0.00824534247388162	4.8352197590749	0.00284770776038551
TraesCS1A01G187700.1	-	-	-	-	-	-	-	-	-	-	4.83420155696453	0.0262159796261525
TraesCS6B01G265600.1	-	-	-	-	-	-	-	-	4.83048589380289	0.0080771792579209	4.90903006865919	0.036102408541367
TraesCS4D01G303000.1	-	-	-	-	-	-	4.82699868908146	0.0218749711891463	-	-	-	-
TraesCS1D01G137000.1	-	-	-	-	-	-	4.82611511945413	0.0398629992493684	-	-	-	-
TraesCS3B01G392800.1	-	-	-	-	-	-	-	-	-	-	4.81804525077219	0.0182704086041555
TraesCS7D01G536400.1	-	-	-	-	-	-	-	-	4.81334652314506	0.049328503163054	-	-
TraesCS2A01G351300.1	-	-	-	-	-	-	4.81277868594062	0.0339153722526781	-	-	-	-
TraesCS2A01G489600.2	-	-	-	-	-	-	-	-	-	-	4.81246384514508	0.0452941364947189
TraesCS2A01G493700.1	-	-	-	-	-	-	-	-	4.80812852746899	0.0165682972336484	-	-
TraesCS3D01G058400.1	-	-	-	-	4.80523469317997	0.0402400746204063	-	-	8.17698116373783	0.0470999344099211	7.59514691269899	0.0185431922559843
TraesCS5D01G455900.1	-	-	-	-	-	-	-	-	4.80366731942728	0.00744717038224207	-	-
TraesCS1D01G218500.1	-	-	-	-	-	-	-	-	-	-	4.80282210804988	0.0231351737587692
TraesCS3B01G274400.1	-	-	-	-	-	-	-	-	4.79581004397772	0.0490284724183319	-	-
TraesCS5B01G448500.1	-	-	-	-	-	-	-	-	-	-	4.79102045034018	0.0460317369260512
TraesCS2B01G428500.2	-	-	-	-	-	-	-	-	4.78994184910082	0.0445596606836075	-	-
TraesCS5A01G391900.1	-	-	-	-	-	-	-	-	4.78866437109824	0.0418628648147269	-	-
TraesCS2D01G421300.1	-	-	-	-	-	-	-	-	4.78022681575412	0.00418739727817988	-	-
TraesCS2D01G506700.1	-	-	-	-	-	-	-	-	4.76977132182345	0.0303315043200309	-	-
TraesCS3D01G032400.1	-	-	-	-	-	-	-	-	-	-	4.76549001743267	0.0266134929026205
TraesCS5D01G137900.1	-	-	-	-	-	-	-	-	4.7542643095166	0.0476888919809746	-	-
TraesCS1B01G176100.1	-	-	-	-	-	-	4.75006572495906	0.0453998175402177	-	-	-	-
TraesCS6D01G048400.1	-	-	-	-	-	-	-	-	4.74788827569199	0.00310353326673568	-	-
TraesCS3A01G482300.1	-	-	4.74533976340177	0.0277072266478419	-	-	-	-	-	-	-	-
TraesCS3A01G176900.1	-	-	-	-	-	-	-	-	4.74432582113339	0.0234437712001119	-	-
TraesCS6B01G104600.1	-	-	-	-	-	-	4.74345618709892	0.0320114540424679	-	-	-	-
TraesCS2A01G109900.1	-	-	-	-	-	-	4.74266241715177	0.0403940347575089	-	-	-	-
TraesCS3B01G127700.1	-	-	-	-	-	-	4.74066010809999	0.0339153722526781	-	-	-	-
TraesCS7A01G386300.1	-	-	-	-	-	-	-	-	4.74016815592702	0.00322588436056519	-	-
TraesCS5D01G282200.1	-	-	-	-	-	-	-	-	6.74591623750683	0.00637731461743952	4.73995031375938	0.0217832551247541
TraesCS1D01G164300.1	-	-	-	-	-	-	4.7392716369945	0.0496675242682818	-	-	-	-
TraesCS4A01G136500.2	-	-	-	-	-	-	4.72804441326128	0.0453998175402177	-	-	-	-
TraesCS2D01G374500.1	-	-	-	-	-	-	-	-	4.72689511789294	0.0378120283262335	-	-
TraesCS2D01G267800.1	-	-	-	-	-	-	-	-	-	-	4.72091199902198	0.00569329448722153
TraesCS3B01G385700.1	-	-	-	-	-	-	4.71140100734639	0.0334673717509088	-	-	-	-
TraesCS1A01G086200.1	-	-	-	-	-	-	-	-	4.71011695866335	0.00404907803727535	-	-
TraesCS3B01G493700.1	-	-	-	-	-	-	-	-	7.21762686615566	0.0165682972336484	4.70600012538124	0.0192286685003722
TraesCS7D01G445300.1	-	-	-	-	-	-	-	-	4.7027152956693	0.00157542220979908	-	-
TraesCS1A01G395100.1	-	-	4.69959772556745	0.0277072266478419	-	-	-	-	-	-	-	-
TraesCS3A01G287500.1	-	-	-	-	-	-	-	-	4.69863638134305	0.0118990363196576	-	-
TraesCS1A01G351900.1	-	-	-	-	-	-	-	-	-	-	4.69846266308206	0.0471992412482526
TraesCS4A01G005500.1	-	-	4.68803443174173	0.0288770168401563	-	-	-	-	-	-	-	-
TraesCS4A01G269900.1	-	-	-	-	-	-	4.68568514279156	0.0499358220017799	-	-	-	-
TraesCS6D01G144600.1	-	-	-	-	-	-	4.68531930894469	0.0453998175402177	-	-	-	-
TraesCS3B01G282500.1	-	-	-	-	4.68281539974425	0.0103219633299842	-	-	-	-	-	-
TraesCS5B01G179800.1	-	-	-	-	-	-	-	-	4.67747621339908	0.0084315432689041	-	-
TraesCS4A01G353300.1	-	-	-	-	-	-	-	-	4.67688279236044	0.0129713124642409	-	-
TraesCS4B01G363700.1	-	-	-	-	-	-	-	-	4.67598757935817	0.010160838644315	-	-
TraesCS7D01G475600.1	-	-	4.66392186394765	0.0489415832345025	-	-	-	-	-	-	-	-
TraesCS7A01G127600.1	-	-	-	-	4.66214263841647	0.0325466264573922	-	-	8.01239033326017	0.0485427842522659	-	-
TraesCS7D01G037700.1	-	-	-	-	-	-	-	-	5.04026078971293	0.00605201866081071	4.65692766110676	0.0214974475647786
TraesCS2D01G170700.1	-	-	-	-	-	-	-	-	-	-	4.65427068357938	0.0464865245352608
TraesCS2D01G321900.1	-	-	-	-	-	-	4.65395393378244	0.0409053191864903	-	-	-	-
TraesCS1A01G420500.1	-	-	-	-	-	-	5.11937469358448	0.0273718458869972	4.65174170613791	0.0134473379013305	-	-
TraesCS7A01G511600.1	-	-	-	-	-	-	-	-	-	-	4.65002013697125	0.0230610086115478
TraesCS5B01G397100.1	-	-	-	-	-	-	4.6491522567974	0.0218163173919149	-	-	-	-
TraesCS3A01G454300.1	-	-	-	-	-	-	-	-	-	-	4.64789379493672	0.00790892384604951
TraesCS6B01G370900.1	-	-	-	-	-	-	-	-	5.68251631628312	0.00584579221932179	4.6402265006742	0.0156149292389538
TraesCS6D01G100200.1	-	-	-	-	-	-	-	-	-	-	4.6395347547521	0.036102408541367
TraesCS3B01G022900.2	-	-	-	-	-	-	4.63640500828776	0.0125446932335908	5.04669963901621	0.00166803560424531	-	-
TraesCS7A01G325500.1	-	-	-	-	-	-	-	-	6.09437436588288	0.00152534136082309	4.63597478489016	0.00867463924166319
TraesCS7D01G024400.1	-	-	-	-	-	-	4.63592921796341	0.0393452581419945	5.68594528675443	0.00157542220979908	-	-
TraesCS5D01G233900.1	-	-	-	-	6.65556744917089	0.0493998948700516	5.40469300305241	0.0488199008659179	4.63568154737791	0.0091547918877506	-	-
TraesCS6A01G008400.1	-	-	-	-	-	-	-	-	4.63463282588878	0.0461547369706015	-	-
TraesCS2A01G508900.1	-	-	-	-	-	-	-	-	-	-	4.63303079897761	0.0233759342073169
TraesCS3D01G257100.1	-	-	-	-	-	-	-	-	4.7855975342857	0.0447766029431827	4.63139555989947	0.0363705552495008
TraesCS3B01G435100.1	-	-	-	-	-	-	-	-	4.62492537765416	0.00874487871874207	-	-
TraesCS1A01G220300.1	-	-	-	-	-	-	-	-	-	-	4.62292958731616	0.0117559203625629
TraesCS5B01G166800.1	-	-	-	-	-	-	-	-	4.61560609026113	0.0225145921466629	-	-
TraesCS4B01G317800.1	-	-	-	-	-	-	5.73435240086462	0.0125446932335908	7.50402780218798	0.0084315432689041	4.59780797083716	0.0444790580238111
TraesCS5D01G417700.1	-	-	-	-	-	-	6.93794367804217	0.0125446932335908	4.58821249996431	0.0364523638439427	-	-
TraesCS4D01G347800.2	-	-	-	-	-	-	-	-	-	-	4.58546307918553	0.00294517161556155
TraesCS4B01G008400.1	-	-	-	-	-	-	4.58417932776132	0.0196927964425318	-	-	-	-
TraesCS7D01G016500.1	-	-	-	-	-	-	-	-	4.58182122592561	0.0125549390853948	-	-
TraesCS2D01G196800.1	-	-	-	-	-	-	-	-	4.57987437974064	0.0433823430820592	-	-
TraesCS4B01G249700.1	-	-	-	-	-	-	4.57602198960245	0.0480303698653529	-	-	-	-
TraesCS6A01G276700.1	-	-	-	-	-	-	-	-	4.56907079971632	0.0287157113283785	-	-
TraesCS5D01G271100.1	-	-	-	-	-	-	-	-	4.56182570516624	0.000912916048648661	-	-
TraesCS3D01G183700.1	-	-	-	-	-	-	-	-	4.55930915969368	0.0246342221950837	-	-
TraesCS5A01G319900.1	-	-	-	-	4.558849486751	0.0419007415446307	-	-	-	-	-	-
TraesCS6A01G339600.1	-	-	-	-	-	-	-	-	4.55698852816197	0.0060926730436008	-	-
TraesCS5D01G312000.1	-	-	4.55651935547972	0.044812760775888	-	-	-	-	-	-	-	-
TraesCS3A01G528800.1	-	-	-	-	-	-	-	-	4.55599338581684	0.0409281197157714	-	-
TraesCS6A01G289700.1	-	-	-	-	-	-	-	-	4.55393280766554	0.0453801567879132	-	-
TraesCS3D01G328100.1	-	-	-	-	-	-	-	-	4.55041848491098	0.0092085182829636	-	-
TraesCS5A01G170300.1	-	-	-	-	-	-	-	-	4.54817501136946	0.0266315146994554	-	-
TraesCS7A01G120300.1	-	-	-	-	-	-	-	-	4.5464643254933	0.0185062954584504	-	-
TraesCS1B01G287400.1	-	-	-	-	-	-	-	-	4.54417049839411	0.0129713124642409	-	-
TraesCS4A01G211600.1	-	-	-	-	-	-	-	-	4.54311271450425	0.0366718861214685	-	-
TraesCS7A01G430000.1	-	-	-	-	5.38222056623931	0.026903012417193	-	-	5.15536281937101	0.00605201866081071	4.54259476198905	0.0458197080186907
TraesCS5B01G120400.1	-	-	-	-	-	-	4.54214687226387	0.028819340017048	-	-	-	-
TraesCS7A01G017600.1	-	-	-	-	-	-	4.54178496078731	0.0125446932335908	-	-	-	-
TraesCS3D01G299700.1	-	-	-	-	-	-	-	-	4.54035251760123	0.0275607443254557	-	-
TraesCS6A01G280000.1	-	-	-	-	4.5396494244553	0.0127498043084084	-	-	-	-	6.01742634487355	0.0191718682454428
TraesCS4B01G260600.1	-	-	-	-	-	-	4.53771495835727	0.0412026239839115	-	-	-	-
TraesCS6D01G269700.1	-	-	-	-	-	-	-	-	4.5299219967455	0.0331046388057211	-	-
TraesCS1D01G403500.1	-	-	-	-	-	-	4.52795897725293	0.0403982295743319	-	-	-	-
TraesCS1D01G407500.1	-	-	-	-	-	-	-	-	4.523455945829	0.0388032097605358	-	-
TraesCS5D01G040500.1	-	-	-	-	-	-	4.52054889951478	0.0339153722526781	-	-	-	-
TraesCS2B01G044400.1	-	-	-	-	-	-	-	-	4.51856615820558	0.0210923351880339	-	-
TraesCS2D01G577000.1	-	-	-	-	-	-	-	-	4.51743291307447	0.00501657360371437	-	-
TraesCS4A01G162200.1	-	-	-	-	-	-	4.51113642334526	0.0453998175402177	-	-	-	-
TraesCS2B01G291800.1	-	-	-	-	-	-	-	-	4.50980301345446	0.00342129740009325	-	-
TraesCS7D01G432300.1	-	-	-	-	-	-	-	-	4.50835634990977	0.0158904154196353	-	-
TraesCS3D01G507900.1	-	-	-	-	-	-	-	-	4.50260135002035	0.0149433506385998	-	-
TraesCS6B01G273400.1	-	-	-	-	4.500402542344	0.0224152960608494	-	-	9.85222428056148	0.00166198932844296	-	-
TraesCS3A01G500500.1	-	-	-	-	-	-	-	-	4.49972761633011	0.0387057229371331	-	-
TraesCS1B01G074300.1	-	-	-	-	-	-	4.49906065685584	0.0125446932335908	-	-	-	-
TraesCS1A01G249000.1	-	-	-	-	-	-	-	-	-	-	4.49704148844411	0.0214974475647786
TraesCS5D01G432700.1	-	-	-	-	-	-	-	-	4.49572789408404	0.00408616555040517	-	-
TraesCS5B01G323300.1	-	-	-	-	4.49405137725684	0.0419007415446307	-	-	-	-	8.76506488510445	0.0340954771606337
TraesCS1A01G362100.1	-	-	-	-	-	-	-	-	4.49155230579337	0.0285427612962142	-	-
TraesCS3B01G105600.1	-	-	-	-	-	-	-	-	4.48524829434346	0.0054386662859454	-	-
TraesCS3D01G347100.1	-	-	-	-	-	-	4.47982419379185	0.0450365869832523	-	-	-	-
TraesCS3D01G142100.1	-	-	-	-	-	-	-	-	4.47969406820433	0.0117832077814668	-	-
TraesCS2A01G117700.1	-	-	-	-	-	-	-	-	4.47483781982832	0.0387576809846578	-	-
TraesCS4B01G052300.1	-	-	-	-	-	-	-	-	4.47134059449976	0.0409276512483725	-	-
TraesCS1D01G398700.1	-	-	-	-	-	-	-	-	4.46931390245723	0.0163742291480795	4.91474626322422	0.00790892384604951
TraesCS4D01G363900.1	-	-	-	-	-	-	4.46464651388668	0.0409053191864903	-	-	-	-
TraesCS5D01G370000.1	-	-	-	-	-	-	-	-	4.46416876713786	0.00832844623241239	-	-
TraesCS1B01G233600.1	-	-	-	-	-	-	-	-	-	-	4.45979811101586	0.0234046210412734
TraesCS5D01G211900.1	-	-	-	-	-	-	4.45693810331321	0.0339153722526781	-	-	-	-
TraesCSU01G141300.1	-	-	-	-	-	-	4.44049289328582	0.0496675242682818	-	-	-	-
TraesCS5A01G373600.2	-	-	-	-	-	-	-	-	4.43858993022323	0.021775625826112	-	-
TraesCS3B01G426900.1	-	-	-	-	-	-	-	-	4.43372271127386	0.0125341072012572	-	-
TraesCS6D01G356300.1	-	-	-	-	-	-	-	-	4.43005319308264	0.00351093054776107	-	-
TraesCS2D01G129200.1	-	-	-	-	-	-	4.42975598057781	0.0339153722526781	-	-	-	-
TraesCS5A01G479300.1	-	-	-	-	-	-	4.4291018565129	0.0488221668359357	-	-	-	-
TraesCS4D01G222700.1	-	-	-	-	-	-	4.42880969261077	0.018331897383029	-	-	-	-
TraesCS1D01G342000.1	-	-	-	-	-	-	8.51912516020175	0.0125446932335908	-	-	4.42533854887272	0.0237765975320195
TraesCS2D01G442000.1	-	-	-	-	-	-	-	-	4.42102743209396	0.0152868615800766	-	-
TraesCS3D01G093300.1	-	-	-	-	-	-	-	-	4.42054825686076	0.0278628311907631	-	-
TraesCS6B01G201500.1	-	-	-	-	-	-	-	-	-	-	4.41861907668151	0.0460317369260512
TraesCS4A01G454800.1	-	-	-	-	-	-	4.41380593068768	0.0338142222370757	-	-	-	-
TraesCS5B01G262700.1	-	-	4.41165145482293	0.0320585926195474	-	-	-	-	-	-	-	-
TraesCS6A01G227900.1	-	-	-	-	-	-	-	-	4.4107463527401	0.00528152672923659	4.63501955910328	0.0344300665241046
TraesCS3B01G395400.1	-	-	-	-	-	-	-	-	4.4091458315123	0.00811284459745485	-	-
TraesCS5D01G191300.1	-	-	-	-	-	-	-	-	4.40848315199572	0.016599834897649	-	-
TraesCS6D01G260200.1	-	-	-	-	-	-	-	-	-	-	4.40374452464926	0.0297691486113094
TraesCS4B01G336100.1	-	-	-	-	-	-	4.40191244050101	0.0155442714538564	-	-	-	-
TraesCS2B01G336000.1	-	-	-	-	-	-	-	-	-	-	4.40034345961856	0.0185431922559843
TraesCSU01G095600.1	-	-	-	-	-	-	-	-	4.39824913259043	0.0154672182577467	-	-
TraesCS1A01G350900.1	-	-	-	-	-	-	4.3927743740746	0.0412026239839115	-	-	-	-
TraesCS1D01G053700.2	-	-	-	-	-	-	-	-	4.39243620342952	0.00676949099566487	-	-
TraesCS6B01G393700.1	-	-	-	-	-	-	-	-	-	-	4.39182168558381	0.0304393678574962
TraesCS4B01G299600.1	-	-	4.38980601794294	0.0452236824583762	-	-	-	-	-	-	-	-
TraesCS7A01G228600.1	-	-	-	-	-	-	4.38440553140917	0.047115757498876	-	-	-	-
TraesCS4B01G196800.1	-	-	-	-	-	-	-	-	4.38371586518722	0.0351617481824061	-	-
TraesCS4B01G001000.1	-	-	-	-	-	-	8.52978909477456	0.0496675242682818	4.38181264627729	0.0245123621222673	-	-
TraesCS5D01G554100.1	-	-	-	-	-	-	-	-	4.38086721066206	0.00404907803727535	-	-
TraesCS7A01G355900.1	-	-	-	-	-	-	4.37358307773492	0.0392227925598455	5.09695883102358	0.00675184312020308	7.46999018077661	0.0387525543683187
TraesCS5B01G412700.1	-	-	-	-	-	-	-	-	4.3712348660316	0.0145145291592803	-	-
TraesCS2B01G521700.1	-	-	-	-	-	-	-	-	5.32021382942512	0.00396257122588722	4.37040956706256	0.0478470796318099
TraesCS2A01G390700.1	-	-	-	-	-	-	4.3695546279119	0.0320114540424679	-	-	-	-
TraesCS7B01G255500.1	-	-	-	-	-	-	4.36160122737326	0.0138851326869752	-	-	-	-
TraesCS1D01G274800.1	-	-	-	-	-	-	-	-	4.36016320441546	0.0482929998329738	-	-
TraesCS4A01G094900.1	-	-	-	-	-	-	-	-	4.35645327263091	0.00664867912889201	-	-
TraesCS4D01G170700.1	-	-	-	-	-	-	-	-	4.35000364824335	0.00210046948765569	-	-
TraesCS6B01G255900.1	-	-	-	-	-	-	4.34897880106726	0.0218163173919149	-	-	-	-
TraesCS3B01G175900.1	-	-	-	-	-	-	-	-	4.34478297619941	0.0117811398440804	-	-
TraesCS4A01G065700.1	-	-	-	-	-	-	4.34215363213895	0.00598903483430069	-	-	-	-
TraesCS1D01G087800.1	-	-	-	-	-	-	-	-	4.34130911400682	0.01092418583665	-	-
TraesCS6D01G105400.1	-	-	-	-	-	-	-	-	-	-	4.33826408680928	0.0346718586676472
TraesCS6B01G440500.1	-	-	-	-	-	-	-	-	-	-	4.33786309013616	0.0452294134037773
TraesCS7D01G268700.1	-	-	-	-	-	-	-	-	4.33773771420219	0.0205421250062104	-	-
TraesCS6A01G360900.1	-	-	-	-	-	-	-	-	4.3349458427334	0.00558895135728653	-	-
TraesCS5D01G553600.1	-	-	-	-	-	-	-	-	4.32339824103128	0.0280895682978857	-	-
TraesCS1D01G114100.1	-	-	-	-	-	-	4.31689653663172	0.0441457915195952	-	-	-	-
TraesCS6A01G166000.1	-	-	-	-	-	-	4.31455908778805	0.0339153722526781	6.71572991799663	0.0181336108095328	-	-
TraesCS1B01G388700.2	-	-	-	-	-	-	-	-	-	-	4.31249899176317	0.0243780557271921
TraesCS6D01G109000.1	-	-	-	-	-	-	6.06974036778162	0.0386862123939445	4.31058226494418	0.0158460198367307	-	-
TraesCS7A01G415400.1	-	-	-	-	-	-	-	-	4.31017609518212	0.0183503112246311	-	-
TraesCS4D01G180700.1	-	-	-	-	4.30977904025061	0.0203627810778749	5.42997103924167	0.0177524673560073	-	-	7.56233521895247	0.0318568268366136
TraesCS7A01G376200.1	-	-	-	-	-	-	4.30864962682697	0.0330754836469723	-	-	5.38725158750884	0.0356562675554146
TraesCS3B01G153400.1	-	-	-	-	4.30591557409874	0.0480057602855715	-	-	6.33219251938175	0.0146814593709342	-	-
TraesCS3A01G448800.1	-	-	-	-	4.30484011114281	0.0224152960608494	5.26693089823756	0.0334673717509088	-	-	-	-
TraesCS3A01G438900.1	-	-	-	-	-	-	4.30405543589753	0.0393452581419945	-	-	-	-
TraesCS3B01G287200.1	-	-	-	-	-	-	-	-	-	-	4.30116731556319	0.0233828164538512
TraesCS3D01G354300.1	-	-	-	-	-	-	-	-	4.29707986858183	0.00142911949979324	5.62082454819556	0.0131916419023259
TraesCS1B01G171800.1	-	-	-	-	-	-	-	-	-	-	4.29330931710757	0.0381551021774522
TraesCS3D01G544000.1	-	-	-	-	-	-	-	-	4.28948561173359	0.0261723453757091	-	-
TraesCS3B01G356600.1	-	-	-	-	-	-	-	-	4.28716576867421	0.000912916048648661	-	-
TraesCS3D01G328300.1	-	-	-	-	-	-	4.28559493710799	0.0125446932335908	-	-	-	-
TraesCS3A01G108400.1	-	-	-	-	-	-	-	-	-	-	4.28403361696087	0.00356759708992362
TraesCS3B01G107200.1	-	-	-	-	-	-	4.28345165570854	0.0301052058764613	-	-	-	-
TraesCS4A01G423000.1	-	-	-	-	-	-	-	-	4.28277463863429	0.0444499210374098	-	-
TraesCS7B01G502200.1	-	-	-	-	-	-	-	-	-	-	4.28245907815761	0.0185431922559843
TraesCS6A01G215300.1	-	-	-	-	4.27856900241471	0.0480057602855715	-	-	-	-	8.69061403893243	0.0488452841197604
TraesCS1B01G201800.1	-	-	-	-	4.27734472511838	0.0224152960608494	-	-	-	-	-	-
TraesCS6A01G386000.1	-	-	-	-	-	-	4.27658211972461	0.0213396722953367	-	-	-	-
TraesCS6D01G189500.1	-	-	-	-	-	-	-	-	4.27505959307817	0.0393001792403357	-	-
TraesCS7B01G262300.1	-	-	-	-	-	-	-	-	4.27089208550759	0.0426405152493453	-	-
TraesCS3A01G359000.1	-	-	-	-	-	-	-	-	4.26825435301839	0.0170753276074722	-	-
TraesCS5B01G340800.1	-	-	4.26451957531917	0.0466977501007626	-	-	-	-	-	-	-	-
TraesCS3D01G089900.1	-	-	4.26288376935012	0.00882931825404625	-	-	-	-	-	-	-	-
TraesCS3A01G146400.1	-	-	-	-	-	-	4.26005250094672	0.0282780540518987	-	-	-	-
TraesCS6A01G247900.1	-	-	-	-	-	-	-	-	4.25859640250093	0.0176640969342298	-	-
TraesCS1B01G207100.1	-	-	-	-	-	-	-	-	4.25635100802339	0.0225445689077858	-	-
TraesCS7A01G312300.1	-	-	-	-	-	-	-	-	4.25621166310234	0.00657171728965921	-	-
TraesCS7D01G444100.1	-	-	-	-	-	-	-	-	4.25526645028861	0.0269409972572288	-	-
TraesCS4A01G091700.1	-	-	4.25497898950594	0.0340500406197101	-	-	-	-	-	-	-	-
TraesCS3A01G516200.1	-	-	-	-	-	-	-	-	-	-	4.25486646718468	0.0457838904668524
TraesCS2B01G630000.1	-	-	-	-	-	-	-	-	4.25266218534114	0.0165682972336484	-	-
TraesCS4D01G205200.1	-	-	-	-	-	-	-	-	-	-	4.24978729656945	0.00968278565016904
TraesCS2D01G528800.1	-	-	-	-	-	-	-	-	4.23850727801898	0.0198423427982858	-	-
TraesCS5B01G418200.1	-	-	-	-	-	-	-	-	4.2365279072283	0.00839388378783781	-	-
TraesCS1B01G168200.2	-	-	-	-	-	-	-	-	4.23486820721825	0.0120052884520826	-	-
TraesCS1B01G295700.1	-	-	-	-	-	-	-	-	4.23448119841391	0.0282667981139683	-	-
TraesCS2D01G271700.1	-	-	-	-	-	-	-	-	4.23348612541904	0.0152943821844799	-	-
TraesCS5A01G496900.1	-	-	-	-	-	-	-	-	4.23171777598935	0.00447702565012627	-	-
TraesCS4D01G035100.1	-	-	-	-	-	-	4.23097487795641	0.0407130346210986	-	-	-	-
TraesCS5D01G168600.1	-	-	4.23056070091495	0.0466977501007626	-	-	-	-	-	-	-	-
TraesCS2D01G506300.1	-	-	-	-	-	-	-	-	4.23011016692507	0.0331232206918683	-	-
TraesCS2D01G492400.1	-	-	-	-	-	-	-	-	4.22765802677822	0.0088442230336041	-	-
TraesCS7A01G172700.1	-	-	-	-	-	-	-	-	-	-	4.22685822112946	0.0263526414460543
TraesCS7B01G299200.1	-	-	-	-	-	-	-	-	4.22484930387127	0.0259290268473402	-	-
TraesCS2B01G359300.1	-	-	-	-	4.25203736478663	0.0188859660413204	-	-	4.22034906588982	0.00584579221932179	5.6118573612678	0.022180711549017
TraesCS4B01G047700.1	-	-	-	-	-	-	4.21793889265444	0.0329828414442211	-	-	-	-
TraesCS5A01G031000.1	-	-	-	-	-	-	4.21643013968526	0.00850820192334036	-	-	-	-
TraesCS6A01G187700.1	-	-	-	-	-	-	-	-	4.21339969794949	0.0215855592000731	-	-
TraesCS6A01G057400.1	-	-	4.20853798961113	0.0320585926195474	-	-	-	-	-	-	-	-
TraesCS3D01G285900.1	-	-	-	-	-	-	-	-	4.20444225568791	0.0197009243973991	-	-
TraesCS6A01G328700.1	-	-	-	-	-	-	-	-	4.19980763308459	0.0234031946070094	8.98587437064819	0.0341432321930246
TraesCS6B01G425000.1	-	-	-	-	-	-	-	-	-	-	4.1994752994841	0.0333783221358254
TraesCS7A01G235500.1	-	-	-	-	4.44969259447438	0.022763357355643	8.26358058936106	0.0125446932335908	4.19882800251226	0.0284022081483182	-	-
TraesCS7B01G320100.3	-	-	-	-	-	-	-	-	4.19377214464532	0.0228469431132396	-	-
TraesCS1A01G410300.1	-	-	-	-	-	-	-	-	4.18336100556015	0.0129713124642409	-	-
TraesCS6A01G219500.1	-	-	-	-	4.1825986353382	0.0251900749425122	-	-	-	-	7.66516856834447	0.00954050071343529
TraesCS1A01G288800.1	-	-	-	-	-	-	4.18227295994956	0.0308053775143759	-	-	-	-
TraesCS1D01G368700.1	-	-	-	-	-	-	4.17840019416909	0.0125446932335908	-	-	-	-
TraesCS2A01G323300.1	-	-	-	-	-	-	-	-	-	-	4.17217258571719	0.0363705552495008
TraesCS7D01G240700.1	-	-	-	-	-	-	4.1675731729809	0.0393033916530646	-	-	-	-
TraesCS2D01G456900.1	-	-	-	-	-	-	-	-	4.16644864105973	0.0384364602005425	-	-
TraesCS6B01G139000.1	-	-	-	-	-	-	4.16413092695695	0.0221623346355251	-	-	-	-
TraesCS7B01G302800.1	-	-	-	-	-	-	-	-	4.16147952085876	0.0266315146994554	-	-
TraesCS7B01G216300.1	-	-	-	-	-	-	-	-	-	-	4.15996150006642	0.0326216370666783
TraesCS4D01G178100.1	-	-	-	-	-	-	-	-	4.15665212376674	0.0393001792403357	4.40874080963104	0.0233828164538512
TraesCS2D01G281300.1	-	-	-	-	-	-	4.15660720455464	0.0177524673560073	-	-	-	-
TraesCS1D01G411000.1	-	-	-	-	-	-	4.15632154179515	0.0329828414442211	-	-	-	-
TraesCS1B01G417200.1	-	-	-	-	-	-	-	-	-	-	4.15372473010654	0.0489372533505533
TraesCS2A01G192900.1	-	-	-	-	-	-	-	-	4.1529217088323	0.00847717742442387	-	-
TraesCS2D01G275100.1	-	-	-	-	-	-	4.15253360155817	0.0339153722526781	-	-	-	-
TraesCS7A01G375800.1	-	-	-	-	4.61874404321217	0.0103219633299842	-	-	-	-	4.15038896980685	0.00420190317368451
TraesCS4B01G111500.1	-	-	-	-	-	-	-	-	4.15008922135019	0.0464405717417974	-	-
TraesCS5A01G314000.1	-	-	-	-	-	-	-	-	-	-	4.14677793975385	0.0196184466521331
TraesCS3D01G149000.1	-	-	-	-	4.18545537595288	0.021716718856892	4.14121057503284	0.0423510544749318	7.90077917094135	0.00210046948765569	8.63808058562197	0.0234641095721086
TraesCS4B01G341100.1	-	-	-	-	-	-	-	-	-	-	4.14044807760898	0.00569329448722153
TraesCS3A01G286800.1	-	-	-	-	-	-	-	-	4.12812282279358	0.00822417819900892	-	-
TraesCS4B01G209100.1	-	-	-	-	-	-	-	-	-	-	4.12601527496447	0.0219907561825045
TraesCS1B01G347100.1	-	-	-	-	-	-	4.12482622008443	0.0339153722526781	-	-	-	-
TraesCS3A01G360500.1	-	-	-	-	-	-	-	-	4.12463241684179	0.00664329478441709	8.11350819978147	0.0332466101732124
TraesCS2A01G352800.1	-	-	-	-	-	-	-	-	4.12311046621108	0.0409276512483725	5.85663132515762	0.0117559203625629
TraesCS3B01G406800.1	-	-	-	-	-	-	-	-	4.1158476213155	0.00572937685463393	-	-
TraesCS1A01G278800.1	-	-	-	-	4.11495191460358	0.0371967327979426	-	-	4.4261744552962	0.0162185049796424	6.81712298991471	0.0196184466521331
TraesCS2D01G583000.1	-	-	-	-	-	-	4.11300922008212	0.0302982559788115	4.17104971676678	0.0304613691756879	-	-
TraesCS4B01G344400.1	-	-	-	-	-	-	-	-	4.11226601514365	0.0336897499979102	-	-
TraesCS5A01G407800.1	-	-	-	-	-	-	-	-	4.11164411101133	0.0345722268822663	-	-
TraesCS2A01G268800.2	-	-	-	-	-	-	-	-	-	-	4.11144239149086	0.014026864373984
TraesCS7B01G434300.1	-	-	-	-	-	-	4.10734938909799	0.0383925687697978	-	-	-	-
TraesCS3A01G353000.1	-	-	-	-	-	-	4.1052637104814	0.03228115485983	-	-	-	-
TraesCS7A01G418600.1	-	-	-	-	-	-	-	-	4.10286443608706	0.0368700003254671	-	-
TraesCS3A01G134200.1	-	-	4.10249490250181	0.00882931825404625	-	-	-	-	-	-	-	-
TraesCS3A01G132700.1	-	-	-	-	-	-	-	-	4.10123328828351	0.0119997470052981	5.81115356325154	0.0182586668712257
TraesCS7B01G399800.1	-	-	-	-	-	-	4.10036349788213	0.0446539443338653	-	-	-	-
TraesCS3B01G463800.1	-	-	-	-	-	-	-	-	4.10009859621213	0.0170287460331535	-	-
TraesCS7D01G354600.1	-	-	-	-	-	-	-	-	4.09884838780209	0.0351617481824061	-	-
TraesCS1B01G258400.1	-	-	-	-	-	-	-	-	4.09435292217875	0.0282667981139683	-	-
TraesCS4B01G186500.1	-	-	-	-	-	-	-	-	-	-	4.09191382268374	0.0457838904668524
TraesCS5D01G239000.1	-	-	-	-	-	-	-	-	-	-	4.08527814798399	0.0131916419023259
TraesCS6A01G068500.1	-	-	-	-	-	-	-	-	-	-	4.07989953245141	0.00883387740764994
TraesCS5D01G470000.1	-	-	-	-	-	-	4.43336851752185	0.0409053191864903	4.07884644114312	0.0256424042036808	-	-
TraesCS2B01G370600.1	-	-	-	-	-	-	-	-	-	-	4.07863238393065	0.022180711549017
TraesCS7D01G414400.1	-	-	-	-	-	-	-	-	-	-	4.07856325139627	0.0269414162023089
TraesCS2D01G276900.1	-	-	-	-	-	-	4.07819311328098	0.0409053191864903	-	-	-	-
TraesCS3D01G540600.1	-	-	4.20100899570187	0.0320585926195474	-	-	4.07731361466574	0.0383925687697978	-	-	-	-
TraesCS5D01G148300.1	-	-	-	-	4.0760444251286	0.0344938353226865	-	-	-	-	-	-
TraesCS6A01G209000.1	-	-	-	-	-	-	-	-	4.58637396473812	0.0201202294603689	4.07134546822854	0.036102408541367
TraesCS5B01G470300.1	-	-	-	-	-	-	-	-	4.07093905922279	0.00764611794589001	-	-
TraesCS7B01G122800.1	-	-	-	-	-	-	-	-	4.06907663179777	0.0062853235683593	-	-
TraesCS3A01G313500.1	-	-	-	-	-	-	4.06763319275411	0.0257112168664398	-	-	-	-
TraesCS2D01G478700.1	-	-	4.06589203053864	0.0447444584931607	-	-	-	-	-	-	-	-
TraesCS6A01G246400.1	-	-	-	-	-	-	4.1339343338567	0.0394714814825615	4.05984493182661	0.00141290744652256	5.09501223542442	0.0132351325740991
TraesCS6B01G033300.1	-	-	-	-	-	-	-	-	4.05973135248224	0.0158904154196353	-	-
TraesCS4A01G044700.1	-	-	-	-	-	-	-	-	4.05541029526167	0.0384364602005425	-	-
TraesCS5D01G505700.1	-	-	-	-	-	-	-	-	4.05483995132311	0.00585747667017575	-	-
TraesCS4A01G293500.1	-	-	-	-	4.1533935870308	0.0355108025752995	-	-	4.05190871535776	0.0305350760208914	-	-
TraesCS6B01G139700.1	-	-	-	-	4.0479246145209	0.0250551746703831	-	-	-	-	6.93689477358578	0.00569329448722153
TraesCS4D01G211100.1	-	-	-	-	-	-	-	-	-	-	4.04672137899058	0.0338246314600112
TraesCS4B01G324400.1	-	-	-	-	-	-	4.90298315869188	0.0196927964425318	5.27587403501166	0.0110986078282781	4.04360424451282	0.0118084028855772
TraesCS2B01G569400.1	-	-	-	-	-	-	-	-	-	-	4.04173836019705	0.031396397130241
TraesCS2D01G036600.1	-	-	-	-	-	-	-	-	4.04008498055687	0.0391927079279333	4.1388252961103	0.0409205290386985
TraesCS6D01G005500.1	-	-	-	-	-	-	-	-	4.0393286784093	0.0107765012428049	-	-
TraesCS1B01G226500.1	-	-	-	-	4.03452593125936	0.0475977564761347	-	-	5.10599251377749	0.00488604893102606	-	-
TraesCS4A01G066500.1	-	-	-	-	-	-	-	-	4.03148702942294	0.0467695971636435	-	-
TraesCS1A01G120200.1	-	-	-	-	-	-	-	-	4.0306213199357	0.00605201866081071	-	-
TraesCS5B01G007100.1	-	-	-	-	-	-	-	-	4.0296396534197	0.0313393705960397	-	-
TraesCS1B01G469200.1	-	-	-	-	-	-	4.02779595946839	0.0450365869832523	4.43746085969452	0.0440586313799828	-	-
TraesCS4D01G271500.1	-	-	-	-	-	-	4.02504752158141	0.0302565172261416	-	-	-	-
TraesCS7A01G254400.1	-	-	-	-	-	-	-	-	4.02494657113699	0.0126172278636607	-	-
TraesCS7B01G044200.1	-	-	4.02211259340844	0.0353482763320662	-	-	-	-	-	-	-	-
TraesCS2A01G433000.1	-	-	-	-	-	-	-	-	-	-	4.01878729757314	0.0156149292389538
TraesCS5A01G178100.1	-	-	-	-	-	-	-	-	4.01876795166812	0.017337367379465	-	-
TraesCS4B01G217100.1	-	-	-	-	-	-	4.0183661936125	0.0336182555857876	-	-	-	-
TraesCS1A01G111000.1	-	-	-	-	-	-	-	-	-	-	4.01304389516659	0.0342358626432513
TraesCS4A01G131500.1	-	-	-	-	-	-	-	-	4.01134755941718	0.0147136120378665	-	-
TraesCS1A01G170000.1	-	-	-	-	4.10802275577328	0.0179845696374827	-	-	4.01104803008467	0.0324702717567759	7.1821871293397	0.00627715275834745
TraesCS4A01G238300.1	-	-	-	-	-	-	-	-	4.00922936759579	0.0387576809846578	-	-
TraesCS1A01G323600.1	-	-	-	-	-	-	-	-	-	-	4.00810227395386	0.036102408541367
TraesCS5A01G127800.1	-	-	-	-	4.0063346821501	0.026168514076239	-	-	7.25556132050585	0.00299081231060481	5.54261723292002	0.0341432321930246
TraesCS3D01G371600.1	-	-	-	-	-	-	4.00221358672503	0.0499358220017799	-	-	-	-
TraesCS7D01G160900.1	-	-	-	-	-	-	39.7998263516199	0.0125446932335908	-	-	-	-
TraesCS5A01G396900.1	-	-	-	-	-	-	7.13662538818625	0.0177847121301592	39.6500104599503	0.007183757673646	-	-
TraesCS3A01G124700.1	-	-	-	-	-	-	-	-	39.2627888820034	0.00142911949979324	-	-
TraesCS2B01G049000.1	-	-	-	-	-	-	-	-	39.1300237042336	0.0273247497796464	-	-
TraesCS2B01G077100.1	-	-	-	-	-	-	-	-	38.5236182802732	0.00907306272814848	-	-
TraesCS7D01G549900.1	-	-	-	-	-	-	-	-	38.3969869315833	0.00936049375541717	-	-
TraesCS3B01G355900.1	-	-	-	-	44.0678316215012	0.0153923976377569	-	-	-	-	38.3552460642407	0.0324348627403995
TraesCS5B01G232700.1	-	-	-	-	-	-	-	-	38.233182339	0.0379295754339621	-	-
TraesCS4D01G303200.1	-	-	-	-	38.0142681460889	0.0321093030374988	-	-	-	-	-	-
TraesCS4B01G075200.1	-	-	-	-	-	-	37.9822104862912	0.0177524673560073	-	-	-	-
TraesCS2B01G490400.1	-	-	-	-	-	-	-	-	-	-	37.824007629808	0.0344300665241046
TraesCS3D01G041400.1	-	-	-	-	-	-	-	-	-	-	37.23519144733	0.00883387740764994
TraesCS3B01G045500.1	-	-	-	-	-	-	-	-	36.5996668619878	0.0265108915812217	-	-
TraesCS7A01G065000.1	-	-	-	-	-	-	-	-	36.5910754692969	0.00815998434731094	-	-
TraesCS1A01G166200.1	-	-	36.3147093856639	0.0429523996816393	-	-	-	-	-	-	-	-
TraesCS5D01G360500.1	-	-	-	-	-	-	-	-	36.3059189030874	0.0200461670311883	-	-
TraesCS4D01G360100.1	-	-	-	-	-	-	36.206361285129	0.0450365869832523	-	-	-	-
TraesCS5A01G503800.1	-	-	-	-	-	-	-	-	355.906294604983	0.000157873456770489	47.9784835096088	0.0172532951111505
TraesCS5D01G317100.1	-	-	-	-	-	-	-	-	355.073555943485	0.0103460114279717	-	-
TraesCS4A01G445800.1	-	-	-	-	-	-	-	-	351.641285020953	0.000737085763424642	-	-
TraesCS3B01G293000.1	-	-	-	-	-	-	-	-	35.6406882311963	0.0132522582286007	-	-
TraesCS7B01G326400.1	-	-	-	-	-	-	35.0141521236756	0.0218163173919149	-	-	-	-
TraesCS7B01G337800.1	-	-	-	-	-	-	-	-	34.5482502829291	0.00404907803727535	-	-
TraesCS3A01G376100.1	-	-	-	-	-	-	-	-	34.3172913150946	0.0100904953773157	-	-
TraesCS2A01G009500.1	-	-	-	-	-	-	-	-	34.0867765483625	0.00573283230980264	-	-
TraesCS5A01G219300.1	-	-	-	-	-	-	-	-	59.6235164482579	0.0244351240008947	34.0587139942635	0.00418498737708596
TraesCS5D01G481200.1	-	-	-	-	-	-	-	-	34.0329309245131	0.00404907803727535	8.44950313017353	0.022180711549017
TraesCS5A01G336600.1	-	-	-	-	-	-	-	-	33.3022164340984	0.0165070231954415	-	-
TraesCS2A01G443300.1	-	-	-	-	-	-	-	-	33.2556266195169	0.0380218269097155	-	-
TraesCS4A01G290800.1	-	-	-	-	-	-	-	-	32.4966007695369	0.0226791849343497	-	-
TraesCS7D01G401500.1	-	-	-	-	-	-	-	-	313.199264857745	0.00211893889489829	-	-
TraesCS1D01G430700.1	-	-	-	-	-	-	-	-	31.8235830187336	0.00579609894936397	-	-
TraesCS5A01G211200.1	-	-	-	-	-	-	-	-	31.7204088619017	0.00646245973601584	-	-
TraesCS4B01G227600.1	-	-	-	-	-	-	-	-	31.7161487045722	0.000776025272205398	-	-
TraesCS5D01G449400.1	-	-	-	-	-	-	-	-	-	-	31.4758967550551	0.0120233526742317
TraesCS2B01G195900.1	-	-	87.1319988259521	0.0320954139588697	-	-	-	-	-	-	31.3952574047261	0.048185776307711
TraesCS2B01G478700.1	-	-	-	-	-	-	-	-	31.393964366625	0.0119997470052981	-	-
TraesCS4B01G155800.1	-	-	-	-	-	-	-	-	31.3202113160398	0.0203227472501406	-	-
TraesCS7A01G336200.1	-	-	-	-	31.296463651676	0.0419007415446307	-	-	-	-	46.5441346204333	0.040174762319028
TraesCS1A01G415100.1	-	-	-	-	-	-	31.2352803934846	0.0334673717509088	-	-	-	-
TraesCS5D01G369400.1	-	-	-	-	-	-	-	-	31.2347775558125	0.00351093054776107	-	-
TraesCS4A01G123100.1	-	-	-	-	-	-	-	-	31.019909344022	0.00462305317147771	-	-
TraesCS1A01G289800.1	-	-	-	-	-	-	57.8541293688795	0.0286225763191045	300.272327349511	0.00152534136082309	-	-
TraesCS1D01G296500.1	-	-	-	-	-	-	30.8936809150996	0.0125446932335908	37.7550738284893	0.024346087107491	-	-
TraesCS3D01G444600.1	-	-	-	-	-	-	-	-	-	-	30.8440066316958	0.0209795495340599
TraesCS4A01G440200.1	-	-	-	-	-	-	30.8025635031316	0.0176610549034613	-	-	-	-
TraesCS3B01G146500.1	-	-	-	-	-	-	30.0985629058321	0.0335703776156374	-	-	-	-
TraesCS2D01G549300.1	-	-	-	-	-	-	30.0954405616179	0.0177847121301592	30.6369732271479	0.0361791336378232	-	-
TraesCS2D01G536100.1	-	-	-	-	-	-	-	-	29.6569688398531	0.00404907803727535	-	-
TraesCS7D01G373200.1	-	-	-	-	-	-	-	-	29.6037449101369	0.0406078330096432	-	-
TraesCS3A01G259900.1	-	-	8.99985584078395	0.0466977501007626	-	-	-	-	29.480268512777	0.0370221670582271	-	-
TraesCS3B01G272600.1	-	-	-	-	-	-	-	-	29.4179995949961	0.0261340188920705	-	-
TraesCS1A01G171300.1	-	-	-	-	-	-	29.4112167054637	0.0450365869832523	-	-	-	-
TraesCS5D01G222600.1	-	-	-	-	-	-	-	-	29.2948371027482	0.0245688437001432	-	-
TraesCS5D01G012500.1	-	-	-	-	-	-	-	-	28.9704567014014	0.0125549390853948	-	-
TraesCS6D01G065100.1	-	-	-	-	-	-	-	-	28.7285906410978	0.00997515178120129	-	-
TraesCS6B01G454300.1	-	-	-	-	-	-	-	-	-	-	28.7280377440063	0.0456949249275216
TraesCS2B01G474600.1	-	-	-	-	8.15784381894362	0.0344938353226865	-	-	28.5020350026734	0.00572937685463393	-	-
TraesCS4D01G182800.1	-	-	-	-	-	-	-	-	-	-	28.4539466909378	0.0449595097590981
TraesCS2B01G482300.1	-	-	-	-	-	-	-	-	28.105550557047	0.00917999459378622	-	-
TraesCS5B01G407800.1	-	-	-	-	-	-	-	-	27.1836963185861	0.00572937685463393	-	-
TraesCS5B01G218600.1	-	-	-	-	-	-	-	-	269.959126049134	0.0206642113371584	-	-
TraesCS5A01G219000.1	-	-	-	-	-	-	-	-	619.350381236642	0.00690820568993989	265.522841615262	0.0384978477224741
TraesCS4D01G303300.1	-	-	-	-	26.9867426611004	0.0188859660413204	-	-	-	-	-	-
TraesCS6D01G015600.1	-	-	-	-	-	-	-	-	-	-	26.8855388595493	0.0351990072654815
TraesCS1D01G048300.1	-	-	-	-	-	-	26.6756452192943	0.0415296110062651	-	-	-	-
TraesCS2B01G605800.1	-	-	-	-	26.3558609384162	0.0263336601255235	34.8812404546549	0.0123011653834647	7.49868312968727	0.00551243010316125	5.35773149744237	0.00790892384604951
TraesCS2B01G517400.1	-	-	-	-	-	-	-	-	26.2523699811254	0.00637731461743952	7.36723638944997	0.0478470796318099
TraesCS6D01G103400.1	-	-	-	-	-	-	26.1375888188863	0.0182542990210459	64.5936054948203	0.00861159813286294	-	-
TraesCS1A01G334100.1	-	-	-	-	-	-	25.9741399065657	0.043076858598645	-	-	-	-
TraesCS1D01G256700.1	-	-	-	-	-	-	25.7264349526772	0.0285282498055519	-	-	-	-
TraesCS1D01G372400.1	-	-	-	-	-	-	-	-	-	-	25.5982322756227	0.025789754629092
TraesCS5B01G059200.1	-	-	-	-	-	-	8.15228989679591	0.015770812265353	25.5169119417796	0.00168846304028041	5.28075862202909	0.00954050071343529
TraesCS3D01G019300.1	-	-	-	-	-	-	-	-	25.4931531949406	0.0129690589992689	38.2652958029017	0.0293827882323432
TraesCS7B01G394000.1	-	-	-	-	-	-	-	-	-	-	25.3414800012713	0.0387525543683187
TraesCS2A01G266000.1	-	-	-	-	-	-	25.2590447954354	0.046519445793985	-	-	-	-
TraesCS3B01G218700.1	-	-	-	-	9.88241954838307	0.0341248319228306	-	-	-	-	25.1654844413139	0.0247375131928777
TraesCS3B01G611800.1	-	-	-	-	-	-	9.54400357825034	0.0496675242682818	25.0048571081224	0.000776025272205398	-	-
TraesCS1A01G334700.1	-	-	-	-	7.7573507335359	0.0205862020771194	-	-	248.840604762537	0.000737085763424642	49.7609033200046	0.00569329448722153
TraesCS1B01G326900.1	-	-	-	-	-	-	-	-	242.392840431982	0.0125712062754104	260.910064254108	0.00569329448722153
TraesCS7A01G053900.1	-	-	-	-	-	-	24.9703788957602	0.0359553918864507	-	-	-	-
TraesCS2B01G189100.1	-	-	-	-	-	-	-	-	24.9455104390398	0.0149402328693448	-	-
TraesCS3D01G128500.1	-	-	-	-	-	-	24.9063165644704	0.0177847121301592	-	-	-	-
TraesCS5D01G121500.1	-	-	-	-	-	-	-	-	24.8473954316479	0.00824534247388162	-	-
TraesCS1D01G315100.1	-	-	-	-	-	-	-	-	24.8093398916546	0.0249928410307164	48.3362971790892	0.0157176682469542
TraesCS5D01G484000.1	-	-	-	-	-	-	-	-	24.4278530691421	0.0127268785047489	-	-
TraesCS5A01G219400.1	-	-	-	-	24.3702710590816	0.0188859660413204	28.9373939280913	0.0288369930031447	60.8089938082238	0.00408616555040517	54.2494657169656	0.00279237221572177
TraesCS4A01G455000.1	-	-	-	-	-	-	24.300491624137	0.0125446932335908	-	-	-	-
TraesCS6D01G384500.1	-	-	-	-	-	-	-	-	24.023971187655	0.0213578853307232	-	-
TraesCS1A01G168600.1	-	-	-	-	-	-	23.8016234484	0.0218749711891463	-	-	31.2815728109656	0.0225087374027793
TraesCS6D01G304900.1	-	-	-	-	-	-	-	-	23.7399093406965	0.00124789821178982	-	-
TraesCS1A01G257500.1	-	-	-	-	-	-	-	-	-	-	23.6194083036803	0.0117559203625629
TraesCS6B01G268700.1	-	-	-	-	-	-	-	-	-	-	23.5636976976516	0.0232186720816771
TraesCS3D01G256600.1	-	-	-	-	-	-	-	-	-	-	23.4923537015901	0.0103070778450617
TraesCS5D01G242300.1	-	-	-	-	23.3278348518126	0.0240784743198783	-	-	-	-	-	-
TraesCS6D01G346300.1	-	-	-	-	-	-	-	-	23.2598347739629	0.0116422451223555	-	-
TraesCS6B01G359000.1	-	-	-	-	-	-	-	-	24.5451977402413	0.0181274329749199	23.1322563030198	0.0234046210412734
TraesCS2B01G451000.1	-	-	-	-	-	-	23.0743758879279	0.0182542990210459	-	-	-	-
TraesCS5B01G212600.1	-	-	-	-	-	-	-	-	-	-	23.0584342028651	0.0459661201797548
TraesCS5B01G311900.1	-	-	-	-	-	-	226.28863160442	0.0453998175402177	-	-	-	-
TraesCS7D01G328700.1	-	-	-	-	-	-	-	-	22.8147940648522	0.00299081231060481	-	-
TraesCS7D01G531800.1	-	-	-	-	22.7864098548429	0.022763357355643	-	-	-	-	-	-
TraesCS6D01G162700.1	-	-	-	-	27.8743313619357	0.0461875701277401	-	-	-	-	22.5365284290796	0.0224833648306541
TraesCS5B01G399800.1	-	-	-	-	-	-	22.4561200777026	0.0462980911615473	-	-	-	-
TraesCS5B01G381500.1	-	-	4.95507079346841	0.0320585926195474	-	-	-	-	22.4540588295411	0.0054386662859454	5.84635281493855	0.00279237221572177
TraesCS2A01G389400.1	-	-	24.828179449202	0.0277072266478419	5.81369682748034	0.0341248319228306	28.8965639730697	0.0302970554903044	22.2230981375157	0.00180481268309125	-	-
TraesCS1A01G374300.1	-	-	-	-	-	-	-	-	22.0705604683838	0.0237335365673867	-	-
TraesCS4D01G006600.1	-	-	-	-	-	-	-	-	-	-	22.0625367743023	0.0212795584109051
TraesCS3B01G359800.1	-	-	-	-	-	-	22.0295241197095	0.0191646055850107	5.87433475245054	0.00624540066787126	5.37430828902553	0.00968278565016904
TraesCS3B01G289500.1	-	-	-	-	-	-	-	-	-	-	21.9505808749551	0.0460317369260512
TraesCS1A01G021200.1	-	-	-	-	-	-	-	-	21.8282320950197	0.0266315146994554	-	-
TraesCS3B01G096600.1	-	-	21.684569084049	0.0320954139588697	-	-	-	-	-	-	-	-
TraesCS7D01G358000.1	-	-	-	-	-	-	-	-	-	-	21.6760217569866	0.00606604857967386
TraesCS5A01G433200.1	-	-	-	-	-	-	-	-	21.6470982141523	0.0168050717619677	-	-
TraesCS1A01G383800.1	-	-	-	-	-	-	-	-	21.4987240808705	0.00528152672923659	-	-
TraesCS5D01G387900.1	-	-	-	-	-	-	-	-	21.4940855867391	0.000912916048648661	-	-
TraesCS1A01G190100.1	-	-	-	-	-	-	21.2520769210047	0.0125446932335908	-	-	-	-
TraesCS4A01G390400.1	-	-	-	-	-	-	7.55966659933758	0.0499358220017799	21.1629580256606	0.00322588436056519	-	-
TraesCS1A01G186800.1	-	-	-	-	-	-	-	-	21.0111220417312	0.00393695082848792	-	-
TraesCS4B01G332900.1	-	-	-	-	30.4066247384065	0.0145894568739034	-	-	208.653674927091	0.00404907803727535	-	-
TraesCS2A01G427200.1	-	-	-	-	-	-	347.698043855963	0.0304917527815367	2036.63174223933	0.00631658374752203	62.1499033898538	0.0107576813345976
TraesCS6A01G336600.1	-	-	-	-	-	-	-	-	4.12460472144407	0.0409236082031102	20.8914580355084	0.0184664932703313
TraesCS4D01G167300.1	-	-	-	-	-	-	6.86601000355428	0.0180873029514452	20.8905483901797	0.000912916048648661	-	-
TraesCS3A01G150800.1	-	-	-	-	20.8770671034374	0.00758751886099189	-	-	27.6519014864007	0.00815216930787373	-	-
TraesCS3D01G038400.1	-	-	-	-	20.8364609399382	0.0409705063134516	44.0261023905856	0.0155917140601223	85.384441621492	0.00105555674606598	-	-
TraesCS5B01G256600.1	-	-	-	-	-	-	-	-	-	-	20.7122977179707	0.00569329448722153
TraesCS1D01G288700.1	-	-	-	-	-	-	20.6981187194519	0.0196927964425318	78.8920369134511	0.00104835907999719	-	-
TraesCS4B01G342900.1	-	-	-	-	8.3701100251622	0.0143194734413809	-	-	-	-	20.6504599591312	0.00968278565016904
TraesCS2A01G522100.1	-	-	-	-	-	-	-	-	20.5688287190889	0.00843300157486614	26.316317932977	0.0251609066731367
TraesCS3B01G394600.1	-	-	-	-	-	-	20.5173336550673	0.0125446932335908	-	-	-	-
TraesCS3A01G101900.1	-	-	-	-	-	-	-	-	55.6273008279679	0.00210046948765569	20.479216368616	0.0233828164538512
TraesCS7B01G259700.1	-	-	-	-	-	-	-	-	20.4695836434528	0.00539993732962822	-	-
TraesCS5B01G064100.1	-	-	-	-	-	-	-	-	20.4622993322938	0.00752060649173317	-	-
TraesCS5B01G337500.1	-	-	-	-	-	-	22.9501178330713	0.0339153722526781	20.461634281646	0.00299081231060481	27.8197808523954	0.0116212317015744
TraesCS5B01G491200.1	-	-	-	-	-	-	-	-	20.4499642867373	0.00608604989403348	-	-
TraesCS5A01G295200.1	-	-	-	-	-	-	-	-	20.3447103945313	0.00950559526581449	-	-
TraesCS1B01G433700.1	-	-	-	-	20.3251613709988	0.0149675023258195	-	-	49.7420544124959	0.00420425702105461	-	-
TraesCS5A01G159900.1	-	-	-	-	-	-	20.3006726216984	0.0336182555857876	22.8312959617701	0.00736591823166989	-	-
TraesCS5D01G464500.1	-	-	20.2851034014665	0.0489415832345025	-	-	-	-	-	-	-	-
TraesCS7A01G235100.1	-	-	-	-	-	-	-	-	20.0669499554185	0.0266315146994554	-	-
TraesCS2B01G459000.1	-	-	-	-	-	-	-	-	20.0626088743363	0.0114141439711716	-	-
TraesCS3D01G133900.1	-	-	-	-	9.99088940990456	0.0402400746204063	20.0153429852242	0.0453998175402177	24.3292560776548	0.00104835907999719	7.64653127844546	0.0185431922559843
TraesCS3A01G131500.1	-	-	-	-	76.295842062819	0.000185296792075416	199.744098100491	0.0339153722526781	-	-	-	-
TraesCS2A01G427100.1	-	-	-	-	-	-	196.886308031665	0.0398629992493684	365.431202718374	0.000776025272205398	-	-
TraesCS7D01G333100.1	-	-	-	-	-	-	-	-	19.9479434895265	0.012396056487932	8.87941870031028	0.00458211793034448
TraesCS7A01G241600.1	-	-	-	-	-	-	-	-	19.9278991448355	0.00568630945605239	-	-
TraesCS5B01G336000.1	-	-	-	-	-	-	-	-	-	-	19.9064193382085	0.0358694406761428
TraesCS6B01G246800.1	-	-	-	-	-	-	-	-	19.8697892676112	0.00722068911521522	-	-
TraesCS3A01G413600.1	-	-	-	-	-	-	-	-	19.8578715470535	0.00744717038224207	-	-
TraesCS1D01G119000.1	-	-	-	-	-	-	-	-	-	-	19.8239432721621	0.0476977226803426
TraesCS7B01G330700.1	-	-	-	-	-	-	-	-	19.7272730392736	0.0386887706204699	-	-
TraesCS2A01G453300.1	-	-	-	-	19.6239602019583	0.0224152960608494	-	-	-	-	-	-
TraesCS7B01G233100.1	-	-	-	-	-	-	-	-	19.5213114705443	0.0205244489839387	-	-
TraesCS4B01G394700.1	-	-	-	-	-	-	19.504666334588	0.0174629314717374	-	-	-	-
TraesCS1B01G196600.1	-	-	-	-	-	-	-	-	-	-	19.4790689135195	0.0296084604277074
TraesCS5B01G426300.1	-	-	-	-	-	-	-	-	19.2656584720018	0.0433823430820592	-	-
TraesCS1D01G337200.1	-	-	-	-	-	-	-	-	19.1617939459007	0.00404907803727535	-	-
TraesCS5D01G516500.1	-	-	-	-	-	-	-	-	19.0370392004725	0.012396056487932	-	-
TraesCS5B01G491500.1	-	-	-	-	20.1280274756624	0.00461176066676169	68.3181047995214	0.0220633890102494	183.882873625716	1.33918590536881e-05	32.5209369613939	0.0217832551247541
TraesCS6B01G383200.1	-	-	-	-	-	-	97.1154645759873	0.0453998175402177	181.163844121213	0.00404907803727535	20.2649400135626	0.0357131723330837
TraesCS5A01G328600.1	-	-	-	-	-	-	-	-	18.8576345905268	0.00447702565012627	-	-
TraesCS7D01G347600.1	-	-	-	-	-	-	-	-	-	-	18.7744734653295	0.00627715275834745
TraesCS6D01G016900.1	-	-	-	-	9.20364064103901	0.0384679226358624	18.6990487843133	0.0222189330313482	-	-	-	-
TraesCS4D01G094400.1	-	-	-	-	-	-	18.682839696058	0.0125446932335908	19.6971346735388	0.00404907803727535	8.78591255867184	0.00279237221572177
TraesCS6A01G146900.1	-	-	-	-	-	-	-	-	70.9268448643654	0.00528152672923659	18.6587672079692	0.0215241832369633
TraesCS5B01G309500.1	-	-	-	-	-	-	8.53302579019383	0.0450365869832523	18.526554139818	0.00105555674606598	6.26583584563507	0.00857384462161244
TraesCS1D01G020800.1	-	-	-	-	-	-	-	-	18.5185484506413	0.0455791219533925	-	-
TraesCS3D01G283700.1	-	-	-	-	-	-	-	-	18.4943570157141	0.0121308063577932	-	-
TraesCS3A01G452100.1	-	-	-	-	-	-	-	-	-	-	18.472539568877	0.00769524649709759
TraesCS3D01G440100.1	-	-	-	-	-	-	18.4684989030952	0.0125446932335908	-	-	-	-
TraesCS5A01G461100.1	-	-	-	-	34.0538424119968	0.0413976490945656	35.3459401917935	0.0177847121301592	18.4496892269723	0.00180481268309125	26.2663503651063	0.0460317369260512
TraesCS7B01G004800.1	-	-	-	-	-	-	18.4367956314103	0.0412026239839115	-	-	-	-
TraesCS5D01G355500.1	-	-	-	-	7.17149798512597	0.0145894568739034	-	-	18.4149086500845	0.00105555674606598	-	-
TraesCS3B01G397400.1	-	-	-	-	18.7824593595701	0.0375067299403049	-	-	9.10180781166711	0.000912916048648661	18.3832587199615	0.0127255166139663
TraesCS6B01G117300.1	-	-	-	-	18.2864753286163	0.0179845696374827	-	-	-	-	-	-
TraesCS7A01G490800.1	-	-	-	-	7.56333110342944	0.0249110981560451	-	-	-	-	18.1554409443566	0.00677739193474898
TraesCS5D01G013400.1	-	-	-	-	-	-	-	-	18.0878121643241	0.0292694892417389	8.02172941226794	0.00968278565016904
TraesCS2A01G514200.1	-	-	-	-	-	-	18.0866512744417	0.0352058669021893	-	-	-	-
TraesCS4A01G071700.1	-	-	-	-	-	-	6.54261346593655	0.0393160979479719	18.053811723781	0.0073465301159736	-	-
TraesCS4B01G097200.1	-	-	-	-	-	-	17.9924243233231	0.0409053191864903	4.70090020577621	0.0108242323454714	-	-
TraesCS3A01G109300.1	-	-	-	-	-	-	17.9791233707875	0.0499358220017799	-	-	-	-
TraesCS7D01G366800.1	-	-	-	-	-	-	-	-	-	-	17.9074806067552	0.00883387740764994
TraesCS1B01G149900.1	-	-	-	-	-	-	17.8741081425579	0.0453998175402177	-	-	-	-
TraesCS1B01G351500.1	-	-	-	-	-	-	17.8741080888611	0.0453998175402177	-	-	-	-
TraesCS4B01G023200.1	-	-	-	-	-	-	-	-	17.8419301254115	0.00657171728965921	-	-
TraesCS2D01G162300.1	-	-	-	-	-	-	-	-	17.820563044847	0.0136279862931636	-	-
TraesCS6A01G350100.1	-	-	-	-	17.8165981262619	0.0118664401645611	-	-	326.684933155018	0.000776025272205398	-	-
TraesCS5D01G164600.1	-	-	-	-	-	-	-	-	17.8080639618639	0.00226156315654876	18.7113556540239	0.00485383800363963
TraesCS1B01G194100.1	-	-	17.7931211252026	0.0454381085676546	-	-	-	-	-	-	-	-
TraesCS7B01G137200.1	-	-	-	-	5.67376440342949	0.0161872238363337	-	-	-	-	17.737670028347	0.0231250032006945
TraesCS2A01G462300.1	-	-	-	-	-	-	-	-	17.5726803013897	0.00528152672923659	-	-
TraesCS4A01G307500.1	-	-	-	-	-	-	-	-	17.4853677468969	0.0147136120378665	-	-
TraesCS3B01G160500.1	-	-	-	-	17.3556811071427	0.022763357355643	-	-	-	-	-	-
TraesCS7B01G461900.1	-	-	-	-	-	-	-	-	-	-	17.345528333769	0.0117559203625629
TraesCS7A01G189500.1	-	-	-	-	-	-	-	-	4.09260878221635	0.0251291564914364	17.2601330302352	0.022180711549017
TraesCS7B01G170400.1	-	-	-	-	-	-	-	-	17.2311482002181	0.00554911001055055	-	-
TraesCS2A01G548200.1	-	-	-	-	-	-	-	-	44.8416247113146	0.0103460114279717	17.198059709978	0.00569329448722153
TraesCS3B01G119400.1	-	-	-	-	17.0759834812842	0.0289306810458188	-	-	87.4355675314343	0.00105555674606598	29.9054747721608	0.0234046210412734
TraesCS5D01G068400.1	-	-	-	-	-	-	17.0578289586873	0.042394086942015	-	-	-	-
TraesCS4A01G224300.1	-	-	-	-	-	-	-	-	17.0497425044528	0.00181524342591719	7.20264729845148	0.00774753444603291
TraesCS6D01G296200.1	-	-	-	-	47.8123971980871	0.00510045647252303	-	-	169.861114997556	0.00657171728965921	256.529173805954	0.0234046210412734
TraesCS5D01G017600.1	-	-	-	-	-	-	-	-	168.588454782316	0.00152534136082309	-	-
TraesCS5D01G017500.1	-	-	-	-	19.3956458863539	0.00461176066676169	70.2763518878648	0.026022322788417	163.249054388925	0.00584579221932179	-	-
TraesCS4D01G225400.1	-	-	-	-	20.3947615021774	0.018112641293146	-	-	-	-	161.008042525854	0.0488452841197604
TraesCS4D01G299100.1	-	-	-	-	-	-	-	-	16.8941275267295	0.0130307406578396	-	-
TraesCS1A01G380900.1	-	-	-	-	-	-	16.8907015835675	0.0409053191864903	-	-	-	-
TraesCS2D01G194200.1	-	-	-	-	-	-	8.78828650605789	0.0155442714538564	16.7730611293383	0.00994371115109632	-	-
TraesCS1A01G074800.1	-	-	-	-	-	-	16.7403151468215	0.0336182555857876	-	-	-	-
TraesCS7A01G454600.1	-	-	-	-	-	-	-	-	16.6583235632013	0.00250701996697266	8.65818202720961	0.0182704086041555
TraesCS5D01G409500.1	-	-	-	-	-	-	-	-	16.5386229705849	0.0238062195854992	-	-
TraesCS4A01G419400.1	-	-	-	-	-	-	-	-	16.4563333001603	0.00828031352223751	35.9986846055569	0.00883387740764994
TraesCS5D01G473500.1	-	-	-	-	33.2052351820528	0.0185744753787394	16.3925616482874	0.0163998152496128	32.4277362888698	0.0045472323407999	20.1687929388481	0.00294517161556155
TraesCS2D01G452900.1	-	-	-	-	-	-	16.3697385093183	0.0446539443338653	53.236273268856	0.00568630945605239	-	-
TraesCS5D01G165000.1	-	-	-	-	-	-	-	-	16.361678083807	0.00105555674606598	-	-
TraesCS1A01G183000.1	-	-	-	-	-	-	-	-	16.3507491761709	0.0436837435793784	-	-
TraesCS5A01G152400.1	-	-	-	-	-	-	-	-	16.3351993074949	0.010160838644315	17.0047482005224	0.00279237221572177
TraesCS2D01G596300.1	-	-	-	-	-	-	-	-	16.2675090600533	0.00528152672923659	-	-
TraesCS7D01G044100.1	-	-	-	-	-	-	-	-	16.2148266385792	0.0283165412400659	-	-
TraesCS4A01G293000.1	-	-	-	-	-	-	4.16087937281104	0.0409053191864903	16.1359194405226	0.00182278977405295	-	-
TraesCS4B01G297100.1	-	-	-	-	-	-	-	-	-	-	16.048520195825	0.0182586668712257
TraesCS7A01G009800.1	-	-	-	-	-	-	-	-	159.479199699166	0.0129690589992689	-	-
TraesCS5A01G146900.1	-	-	-	-	-	-	-	-	-	-	156.404104824927	0.0452941364947189
TraesCS4A01G107100.1	-	-	-	-	-	-	-	-	153.516528050685	0.00528152672923659	17.0020683101623	0.0300324502464605
TraesCS2D01G460800.1	-	-	-	-	-	-	-	-	152.872537930926	0.00104835907999719	-	-
TraesCS4B01G367500.1	-	-	-	-	-	-	152.598661289682	0.018027222927525	850.015889493807	0.00105555674606598	-	-
TraesCS3B01G409000.1	-	-	15.9513262076964	0.0348167397536894	-	-	-	-	-	-	-	-
TraesCS5A01G058700.1	-	-	-	-	-	-	-	-	17.3650904046059	0.0416651103569503	15.9277785276405	0.0185944272901074
TraesCS7A01G423900.1	-	-	-	-	-	-	15.9151481834292	0.0336182555857876	-	-	-	-
TraesCS2D01G425300.1	-	-	-	-	-	-	-	-	861.116435883268	0.00181524342591719	15.8634540582941	0.0209129455635095
TraesCS3A01G181000.1	-	-	-	-	-	-	-	-	-	-	15.8410800955985	0.0225109176183555
TraesCS3B01G344800.1	-	-	-	-	15.7549830864729	0.0355108025752995	-	-	-	-	-	-
TraesCS5A01G503900.1	-	-	-	-	-	-	-	-	15.7405974131755	0.000912916048648661	-	-
TraesCS4A01G315000.1	-	-	-	-	-	-	-	-	15.7090199973464	0.00731956367422066	-	-
TraesCS7D01G477100.1	-	-	-	-	15.6904106966219	0.0173925501645821	-	-	-	-	21.452806912939	0.0457333062646322
TraesCS3B01G205100.1	-	-	-	-	-	-	-	-	15.6135173372333	0.00572937685463393	-	-
TraesCS2A01G539500.1	-	-	-	-	-	-	-	-	8.08969677326818	0.0087642343306467	15.5871618076847	0.0182704086041555
TraesCS7D01G271900.1	-	-	-	-	-	-	-	-	15.5466125073127	0.00551243010316125	-	-
TraesCS4D01G050800.1	-	-	-	-	-	-	15.4419540740708	0.0125446932335908	-	-	-	-
TraesCS4B01G193700.1	-	-	-	-	15.4377224317468	0.0143194734413809	-	-	-	-	28.8260603510763	0.0204258992103442
TraesCS3D01G130300.1	-	-	-	-	15.4188581209556	0.0118664401645611	-	-	-	-	-	-
TraesCS7B01G248500.1	-	-	-	-	-	-	-	-	15.3833941292219	0.00246148751988795	7.53416171663595	0.00569329448722153
TraesCS1B01G326600.1	-	-	-	-	-	-	-	-	15.3350137119204	0.0483705480398587	-	-
TraesCS3A01G311900.1	-	-	-	-	-	-	-	-	-	-	15.3338036517971	0.0163826637766808
TraesCS4B01G182900.1	-	-	-	-	-	-	6.96824328999242	0.034337026033403	15.3300057404724	0.00232123959049718	47.6787717216352	0.022180711549017
TraesCS7A01G069300.1	-	-	-	-	-	-	-	-	9.96425030395699	0.0243100807941553	15.2879425703551	0.00954050071343529
TraesCS4B01G248900.1	-	-	-	-	-	-	-	-	-	-	15.2750919137683	0.0107236916748743
TraesCS4B01G115100.1	-	-	-	-	-	-	-	-	15.2505415964051	0.0165682972336484	-	-
TraesCS5D01G159700.1	-	-	-	-	-	-	-	-	15.1827859997501	0.00404907803727535	-	-
TraesCS7D01G126000.1	-	-	-	-	-	-	-	-	15.1480151458492	0.0373741198637232	-	-
TraesCS6A01G177700.1	-	-	-	-	-	-	-	-	15.0994548182397	0.00677785698706527	6.59743183666053	0.0185256794274087
TraesCS5B01G470100.1	-	-	16.5339858062633	0.0288770168401563	-	-	-	-	15.0851389592868	0.0045472323407999	-	-
TraesCS3B01G167200.1	-	-	-	-	-	-	-	-	15.0315746771623	0.00693858836463676	-	-
TraesCS7D01G428800.1	-	-	-	-	-	-	81.9323111696392	0.0257683887070891	147.185703366144	0.0115299073938009	-	-
TraesCS7D01G008800.1	-	-	-	-	36.0403155852663	0.0118664401645611	-	-	87.0140049062963	0.0165682972336484	146.166217614937	0.00857402789789414
TraesCS5D01G318100.1	-	-	-	-	-	-	146.084685589415	0.0394714814825615	309.82294647976	0.00158555499437086	-	-
TraesCS5A01G311300.1	-	-	-	-	-	-	-	-	143.807360081432	0.0396615008299098	-	-
TraesCS2A01G159100.1	-	-	-	-	-	-	-	-	143.705245219754	0.00103120435521881	-	-
TraesCS5B01G218200.1	-	-	-	-	-	-	-	-	142.479773441544	0.0314446054371668	58.9530215462608	0.0344300665241046
TraesCS5D01G227000.1	-	-	-	-	-	-	-	-	79.4574200464724	0.0331232206918683	141.01289388964	0.0332466101732124
TraesCS1A01G358400.1	-	-	-	-	-	-	-	-	140.258547159944	0.0431915965926208	-	-
TraesCS5D01G315900.1	-	-	-	-	-	-	9.84927535624194	0.0177847121301592	14.9937377042557	0.00693858836463676	5.03528908071464	0.0124543196070089
TraesCS1A01G423100.1	-	-	-	-	14.9509781451866	0.0384679226358624	19.8027838050336	0.0339153722526781	-	-	4.72969591530843	0.0117559203625629
TraesCS7B01G094400.1	-	-	-	-	4.84668821877556	0.0350669202435865	-	-	5.24381600603455	0.0199352066308662	14.8829849820127	0.022180711549017
TraesCS5A01G221200.1	-	-	14.8461839597447	0.0416582097857351	-	-	-	-	-	-	-	-
TraesCS2D01G290000.1	-	-	-	-	-	-	-	-	14.8446959856379	0.0088442230336041	-	-
TraesCS2D01G088400.1	-	-	-	-	-	-	-	-	14.8031642961615	0.0340585852791229	-	-
TraesCS6B01G092000.1	-	-	-	-	-	-	-	-	14.7976071300776	0.0168050717619677	-	-
TraesCS4B01G354900.1	-	-	-	-	-	-	-	-	19.3999607182934	0.00217379392750952	14.7864091308342	0.0137419765129565
TraesCS3A01G347400.1	-	-	-	-	14.7853710031727	0.0103219633299842	-	-	-	-	-	-
TraesCS3A01G532700.1	-	-	-	-	-	-	-	-	14.7818240287831	0.0108242323454714	-	-
TraesCS1D01G286200.1	-	-	-	-	-	-	-	-	-	-	14.7744028310341	0.0117559203625629
TraesCS1B01G304800.1	-	-	-	-	14.6768664742897	0.0342426266163222	-	-	164.226406899855	0.00664867912889201	-	-
TraesCS6B01G117400.1	-	-	-	-	-	-	14.6415131394935	0.0125446932335908	-	-	-	-
TraesCS4B01G305000.1	-	-	-	-	-	-	-	-	-	-	14.5796450836465	0.0464865245352608
TraesCS6B01G271900.1	-	-	14.5209566334833	0.0320954139588697	-	-	-	-	7.51802247960706	0.0287157113283785	-	-
TraesCS1B01G241400.1	-	-	-	-	-	-	14.5176044943375	0.0155917140601223	-	-	-	-
TraesCS2D01G348900.1	-	-	-	-	-	-	-	-	16.6443171062531	0.00270717230437102	14.4862103689945	0.027106277858157
TraesCS5A01G360000.1	-	-	-	-	7.76363784881957	0.0109597897532408	14.4528159936266	0.0351914354061562	5.94950268969572	0.00823476486601198	4.09498253680943	0.00968278565016904
TraesCS7A01G178800.1	-	-	-	-	-	-	-	-	14.4378865342053	0.00292623662009557	-	-
TraesCS6D01G166600.1	-	-	-	-	-	-	-	-	-	-	14.4241528319659	0.0207603446853973
TraesCS7D01G503400.1	-	-	-	-	-	-	-	-	14.4175705959598	0.0165682972336484	-	-
TraesCS4B01G332700.1	-	-	-	-	7.42413042592477	0.0188859660413204	-	-	14.4164873806317	0.00158555499437086	-	-
TraesCS2D01G396700.1	-	-	-	-	-	-	-	-	-	-	14.4129936898285	0.0107576813345976
TraesCS7A01G370400.1	-	-	-	-	-	-	-	-	-	-	14.3961262455307	0.0263526414460543
TraesCS2D01G540100.1	-	-	-	-	-	-	-	-	33.9300520456298	0.0109057164995692	14.3520224646513	0.022180711549017
TraesCS5B01G568600.1	-	-	-	-	-	-	-	-	14.3499312189772	0.0165682972336484	-	-
TraesCS5D01G031300.1	-	-	-	-	5.57668593488768	0.0289306810458188	14.3421406997501	0.0280041183260086	9.64793648577467	0.00859586129934862	5.30933779417487	0.0471737790277955
TraesCS3D01G279700.1	-	-	-	-	9.098348955734	0.0234625296855548	-	-	14.3366830025676	0.00180481268309125	36.4817197316616	0.0109187985729158
TraesCS5D01G238700.1	-	-	-	-	-	-	-	-	14.3306439796582	0.00661910098707319	-	-
TraesCS7D01G225700.1	-	-	-	-	-	-	14.8414620956406	0.0450365869832523	14.3135034278928	0.00589243927439218	-	-
TraesCS5D01G472000.1	-	-	-	-	-	-	-	-	14.2685708884994	0.00631658374752203	-	-
TraesCS3A01G338900.1	-	-	-	-	-	-	14.2659538111962	0.0480303698653529	-	-	-	-
TraesCS7B01G391400.1	-	-	-	-	-	-	14.260258311896	0.0339153722526781	-	-	-	-
TraesCS5A01G403600.1	-	-	-	-	14.2259614805345	0.0499007322373203	165.110306127955	0.0282780540518987	52.6964352619421	0.00396257122588722	7.53255297389612	0.0387525543683187
TraesCS6B01G058300.1	-	-	-	-	-	-	7.84297830208709	0.0271928174080898	14.2012311765473	0.00420425702105461	-	-
TraesCS3D01G501100.1	-	-	-	-	-	-	-	-	14.1002216923861	0.0162685627728347	4.34752529996634	0.00883387740764994
TraesCS6D01G076400.1	-	-	-	-	14.0625174076449	0.0415917533940711	46.4936577694668	0.0184126874385975	-	-	-	-
TraesCS1B01G287800.1	-	-	-	-	-	-	-	-	9.84023534437744	0.00664867912889201	14.0044281928172	0.0293249095245269
TraesCS5A01G310100.1	-	-	-	-	-	-	-	-	134.73443557136	0.00630152340782984	-	-
TraesCS5A01G310500.1	-	-	-	-	-	-	-	-	133.853495942546	0.00404907803727535	-	-
TraesCS5D01G226900.1	-	-	-	-	-	-	-	-	307.616777197509	0.0163742291480795	132.724598857647	0.0460317369260512
TraesCS3D01G332500.1	-	-	-	-	-	-	-	-	13.9883137812582	0.0478223812136566	-	-
TraesCS3B01G370300.1	-	-	-	-	-	-	-	-	5.73529084739303	0.0342949439583109	13.9765933833758	0.0316116148748261
TraesCS4D01G130600.2	-	-	-	-	-	-	5.00323843359986	0.026022322788417	13.9674234957751	0.00404907803727535	-	-
TraesCS6D01G054400.1	-	-	-	-	-	-	13.914245076857	0.0125446932335908	21.9537450899042	0.00152534136082309	-	-
TraesCS2B01G213400.1	-	-	-	-	18.3585493365107	0.0146871179634957	24.0541110835629	0.0339153722526781	13.9141297786319	0.00568630945605239	17.3994343180665	0.00883387740764994
TraesCS4D01G194700.1	-	-	-	-	-	-	-	-	13.7897087213195	0.00335747309640856	38.0498464218922	0.022180711549017
TraesCS5B01G557100.1	-	-	-	-	-	-	13.7562598263097	0.0125446932335908	-	-	-	-
TraesCS3D01G120200.1	-	-	-	-	-	-	-	-	4.79967983546308	0.0282667981139683	13.7139377933007	0.023894696941548
TraesCS7A01G236400.1	-	-	-	-	-	-	13.6396915112389	0.0453998175402177	-	-	-	-
TraesCS3B01G455200.1	-	-	-	-	-	-	-	-	13.6197960835683	0.00299081231060481	-	-
TraesCS5A01G524200.1	-	-	-	-	4.13943190054865	0.0179845696374827	7.03089565101235	0.0382726752223491	13.607113375789	0.00555267675223653	6.06141243359623	0.0163826637766808
TraesCS4B01G391800.1	-	-	-	-	-	-	-	-	13.5667824751052	0.0280895682978857	-	-
TraesCS5D01G180900.1	-	-	-	-	-	-	-	-	13.5340433248635	0.00166803560424531	-	-
TraesCS5B01G401900.1	-	-	-	-	-	-	8.17983762378642	0.0339153722526781	13.5214677061834	0.00693858836463676	-	-
TraesCS6D01G320200.1	-	-	7.55207295829925	0.0454381085676546	-	-	96.7388677742694	0.0451388569793704	13.515982560332	0.0318188060313073	-	-
TraesCS1D01G106700.1	-	-	-	-	-	-	-	-	13.4923244027944	0.0165070231954415	-	-
TraesCS4A01G095100.1	-	-	-	-	13.4867107795504	0.0178522889387653	-	-	-	-	8.82402520913191	0.0173271925017517
TraesCS5D01G026400.1	-	-	-	-	-	-	-	-	-	-	13.4790783231771	0.0185431922559843
TraesCS1D01G018000.1	-	-	-	-	-	-	-	-	13.4671248744694	0.00637731461743952	-	-
TraesCS3D01G430100.1	-	-	-	-	-	-	13.4054211558351	0.0160242078832911	-	-	-	-
TraesCS3A01G228200.1	-	-	-	-	-	-	4.09690637588855	0.0339153722526781	13.4012652552322	0.0314446054371668	-	-
TraesCS3B01G041800.1	-	-	-	-	-	-	223.414128272284	0.0180873029514452	265.282248512181	0.000737085763424642	13.4002707903634	0.0184664932703313
TraesCS4D01G088800.1	-	-	-	-	-	-	-	-	13.3334393979615	0.00543890887534337	-	-
TraesCS4D01G014300.1	-	-	-	-	-	-	14.9611094670443	0.0339153722526781	16.7243286209565	0.00210046948765569	13.3124542639049	0.0200773156443464
TraesCS7D01G184400.1	-	-	-	-	-	-	4.13395294738847	0.0288369930031447	13.3055810562234	0.00335747309640856	-	-
TraesCS2A01G525400.2	-	-	-	-	-	-	13.2956694153747	0.0453998175402177	4.16322477691069	0.0242265851467069	-	-
TraesCS5D01G157600.1	-	-	-	-	-	-	-	-	24.9670375064201	0.0406078330096432	13.2865589758213	0.0457333062646322
TraesCS3B01G001500.1	-	-	-	-	13.2855050616136	0.012486409944353	-	-	-	-	-	-
TraesCS3A01G038300.1	-	-	-	-	-	-	-	-	13.2662031561911	0.0165682972336484	-	-
TraesCS7B01G123100.1	-	-	-	-	-	-	13.2359071078757	0.0339153722526781	-	-	-	-
TraesCS3A01G209800.1	-	-	-	-	-	-	-	-	13.2198996241999	0.00568630945605239	8.46600149756907	0.0362195112422012
TraesCS3D01G425600.1	-	-	-	-	-	-	-	-	-	-	13.2197014626511	0.0358694406761428
TraesCS4D01G329400.1	-	-	-	-	6.54942720933809	0.0473713690730525	-	-	13.2107648008162	0.00264315891037037	5.26025175674416	0.0262159796261525
TraesCS6A01G321300.1	-	-	-	-	-	-	-	-	42.8516495742936	0.00264315891037037	13.1851247425094	0.0124543196070089
TraesCS1A01G444200.1	-	-	-	-	-	-	13.1689533181272	0.0221623346355251	-	-	-	-
TraesCS3B01G314600.1	-	-	-	-	-	-	30.6212282433274	0.0174134225416811	33.8856932377883	0.0281081899767585	13.1613629081749	0.0326216370666783
TraesCS5D01G491900.1	-	-	-	-	13.1535715596682	0.0402400746204063	-	-	272.551510041016	0.00166198932844296	33.0438205215695	0.00774753444603291
TraesCS1D01G422600.1	-	-	-	-	-	-	-	-	16.6334348439364	0.0194793961039696	13.1410388420593	0.00627715275834745
TraesCS4B01G057200.1	-	-	-	-	-	-	17.4240497566042	0.0409053191864903	13.1328801789247	0.00103120435521881	-	-
TraesCS4D01G348400.1	-	-	-	-	-	-	-	-	23.4601300061746	0.00158555499437086	13.1051426116954	0.0153591536896383
TraesCS6A01G114900.1	-	-	-	-	-	-	13.0923238322974	0.0453998175402177	46.3640592334278	0.00352081263800582	-	-
TraesCS5B01G073000.1	-	-	-	-	-	-	-	-	13.0836664263075	0.0117491978838195	-	-
TraesCS7A01G238900.1	-	-	-	-	-	-	13.0354025480465	0.0394714814825615	-	-	-	-
TraesCS2A01G590700.1	-	-	-	-	-	-	13.0248277571133	0.0339153722526781	-	-	-	-
TraesCS2A01G157400.1	-	-	13.0190084345746	0.0340442264315945	-	-	-	-	-	-	-	-
TraesCS6D01G249100.1	-	-	-	-	-	-	-	-	13.0112604220903	0.00664867912889201	-	-
TraesCS3D01G346300.1	-	-	-	-	-	-	129.231993970839	0.0390710193648396	8.96136089960567	0.0197852209765003	-	-
TraesCS7D01G215700.1	-	-	-	-	-	-	-	-	147.373419950651	0.0181274329749199	124.354685376473	0.0326216370666783
TraesCS1B01G326800.1	-	-	-	-	-	-	-	-	124.141144058886	0.0130774393552774	151.239166475147	0.023894696941548
TraesCS4B01G197300.1	-	-	-	-	73.2519870324443	0.0203627810778749	-	-	1231.75548379543	0.00223697284513774	94.1867373295019	0.025661097626676
TraesCS4B01G096800.1	-	-	-	-	-	-	-	-	123.940707195192	0.0030435314337131	-	-
TraesCS4A01G485900.1	-	-	-	-	-	-	123.840084352605	0.0453998175402177	-	-	-	-
TraesCS5B01G059300.1	-	-	-	-	-	-	123.041547536465	0.0177847121301592	-	-	-	-
TraesCS1B01G299300.1	-	-	-	-	-	-	18.852501421079	0.0393160979479719	122.619979246535	0.00040522747688355	8.52273239946839	0.0344300665241046
TraesCS5B01G217900.1	-	-	-	-	120.786354148641	0.0146871179634957	-	-	-	-	-	-
TraesCS2D01G556900.1	-	-	-	-	-	-	12.9870699650166	0.0499358220017799	-	-	-	-
TraesCS2B01G333900.1	-	-	-	-	-	-	-	-	-	-	12.9654182902339	0.0234046210412734
TraesCS3A01G226600.1	-	-	-	-	-	-	-	-	-	-	12.9564470057689	0.00569329448722153
TraesCS3A01G447400.1	-	-	-	-	12.954843852297	0.00764045543343918	-	-	-	-	14.1995661872133	0.0417505598931645
TraesCS6B01G181400.1	-	-	8.97705929109303	0.0466977501007626	-	-	18.918563006471	0.0339153722526781	12.9019275670184	0.0319141042930288	27.4713695964478	0.00616074897526604
TraesCS2D01G288900.1	-	-	-	-	-	-	-	-	-	-	12.8514259570977	0.0229983255747308
TraesCS7B01G073000.1	-	-	-	-	-	-	-	-	12.8460735019828	0.0084315432689041	-	-
TraesCS1B01G429300.1	-	-	-	-	12.829519329928	0.0372586167121567	-	-	-	-	-	-
TraesCS6D01G149300.1	-	-	-	-	8.1268432856482	0.0146871179634957	5.86205279818609	0.0383925687697978	-	-	12.8143186417664	0.00954050071343529
TraesCS5B01G463500.1	-	-	-	-	-	-	-	-	19.6634617266132	0.0199352066308662	12.7911648271552	0.0363400654375555
TraesCS5B01G202700.1	-	-	-	-	-	-	12.7840097116364	0.0453998175402177	-	-	-	-
TraesCS7A01G427000.1	-	-	-	-	-	-	-	-	12.7721688518081	0.0199352066308662	-	-
TraesCS1D01G141000.1	-	-	-	-	-	-	-	-	12.7713585841707	0.0234143176454026	-	-
TraesCS5B01G040700.1	-	-	-	-	12.7597466027641	0.0270430178398165	-	-	-	-	-	-
TraesCS3A01G279800.1	-	-	-	-	-	-	-	-	12.7372612717998	0.00664867912889201	-	-
TraesCS2B01G124100.1	-	-	-	-	7.40003492060102	0.0249110981560451	-	-	4.37407900107889	0.0205421250062104	12.7251573165261	0.00294517161556155
TraesCS3A01G122000.1	-	-	-	-	-	-	-	-	7.25859718397379	0.00372296090659377	12.7064670593141	0.0214974475647786
TraesCS2A01G141600.1	-	-	-	-	-	-	12.6915710171643	0.0282780540518987	-	-	-	-
TraesCS7B01G088000.1	-	-	-	-	-	-	-	-	12.6736213561045	0.00241101352650435	-	-
TraesCS7D01G240600.1	-	-	-	-	-	-	21.3026644000213	0.0125446932335908	12.6286514199728	0.00616185189085976	-	-
TraesCS1B01G188300.1	-	-	-	-	-	-	12.625713436767	0.0155917140601223	5.92277021636451	0.0223188790154189	-	-
TraesCS1D01G397300.1	-	-	-	-	-	-	-	-	8.29923356631476	0.00664867912889201	12.5999592355085	0.0196184466521331
TraesCS2B01G579100.1	-	-	-	-	12.5936332087573	0.0487603558861442	32.2727774829765	0.0329828414442211	66.8186964420162	0.00341936161901012	-	-
TraesCS5A01G468300.1	-	-	-	-	-	-	-	-	48.7022048707236	0.00244295248390281	12.5799984157729	0.0458197080186907
TraesCS5A01G312700.1	-	-	-	-	-	-	12.5025682124241	0.0254374572970106	-	-	-	-
TraesCS1B01G018900.1	-	-	-	-	-	-	12.4801924196266	0.0393033916530646	-	-	-	-
TraesCS2D01G438200.1	-	-	-	-	-	-	12.4550760179271	0.0292966824197426	-	-	-	-
TraesCS2D01G115100.1	-	-	-	-	-	-	-	-	12.4529394218088	0.0445596606836075	-	-
TraesCS4A01G110300.1	-	-	-	-	-	-	-	-	12.4437891891289	0.0464291489944752	27.8275295897585	0.00279237221572177
TraesCS2A01G064900.1	-	-	-	-	-	-	-	-	12.4163809133212	0.0280370603669568	-	-
TraesCS6D01G260100.1	-	-	-	-	-	-	-	-	-	-	12.3970915866023	0.0301823804277242
TraesCS2D01G106800.1	-	-	-	-	17.2722693517079	0.0475977564761347	-	-	-	-	12.3823790491509	0.00883387740764994
TraesCS5A01G007900.1	-	-	-	-	-	-	-	-	22.0114252095379	0.0198792541260168	12.313355468095	0.0157196607032282
TraesCS3B01G102600.1	-	-	-	-	16.2352507905831	0.0480057602855715	7.16295163240455	0.0409053191864903	12.3060232688647	0.00404907803727535	16.2701532421705	0.0114547413097564
TraesCS1A01G188900.1	-	-	-	-	-	-	-	-	-	-	12.2940364299865	0.022180711549017
TraesCS3D01G505400.1	-	-	-	-	-	-	-	-	12.2764863582149	0.0271296562472277	-	-
TraesCS1B01G322100.1	-	-	-	-	-	-	12.272201100762	0.0177847121301592	5.13184971333302	0.0313193215665143	4.16855532038275	0.0432617898009275
TraesCS3D01G149600.1	-	-	-	-	-	-	-	-	12.271804733205	0.0225348177933639	27.3375647902213	0.00651658134516364
TraesCS7D01G049100.1	-	-	-	-	-	-	12.2438285207091	0.0125446932335908	16.0001080487459	0.00528152672923659	-	-
TraesCS7B01G372500.1	-	-	-	-	5.26761183186686	0.0342426266163222	-	-	-	-	12.2390522142268	0.0153591536896383
TraesCS7B01G355200.1	-	-	-	-	-	-	-	-	-	-	12.2384862972372	0.0363400654375555
TraesCS2D01G477900.1	-	-	-	-	-	-	12.2127963566627	0.0450365869832523	-	-	-	-
TraesCS1D01G301700.1	-	-	-	-	-	-	-	-	-	-	12.2003479898303	0.0492841436903416
TraesCS5D01G160900.1	-	-	-	-	-	-	-	-	12.1928827672793	0.0170287460331535	-	-
TraesCS4D01G251000.1	-	-	-	-	-	-	12.1704040515678	0.0450365869832523	-	-	-	-
TraesCS4B01G015500.1	-	-	-	-	-	-	-	-	12.1181474386978	0.015669984627425	5.02128179044685	0.0283755012645947
TraesCS4B01G228400.1	-	-	-	-	-	-	-	-	12.1003149664121	0.043935132087726	-	-
TraesCS5A01G300800.1	-	-	-	-	-	-	-	-	7.31162929651059	0.0263110535625718	12.0938811264195	0.0471249274358954
TraesCS3A01G056400.1	-	-	-	-	-	-	8.90292651599924	0.0409053191864903	12.0216717958748	0.0410325208375976	-	-
TraesCS7D01G059600.1	-	-	-	-	-	-	18.1845615151909	0.0177847121301592	119.839180924918	0.00141290744652256	-	-
TraesCS5A01G478500.1	-	-	-	-	12.2811214152797	0.0103219633299842	34.4752480072593	0.0282780540518987	119.45578008726	0.00207370419628355	-	-
TraesCS7A01G439200.1	-	-	-	-	14.0896921562675	0.0288767381758766	118.9858127475	0.0411652619860956	-	-	-	-
TraesCS5B01G145800.1	-	-	-	-	-	-	-	-	-	-	117.109733748046	0.0125975410711923
TraesCS4B01G332800.1	-	-	-	-	-	-	33.7498686888021	0.0180873029514452	115.328849121075	0.00264315891037037	7.99893246486231	0.00485383800363963
TraesCS4D01G360000.1	-	-	-	-	-	-	54.2294113184722	0.018331897383029	1111.03150936355	0.00238845637345067	-	-
TraesCS5B01G320500.1	-	-	-	-	-	-	80.8322972854309	0.0155442714538564	111.969805375388	0.00264315891037037	13.08661873562	0.0147039886422055
TraesCS3D01G439100.1	-	-	-	-	-	-	-	-	16.5875527719901	0.00180481268309125	11.9916093824629	0.00931040666480233
TraesCS2D01G176800.1	-	-	-	-	-	-	-	-	-	-	11.9886151837678	0.0271529142392372
TraesCS1D01G083900.1	-	-	-	-	-	-	-	-	11.9772503307617	0.0125418116594976	-	-
TraesCS7B01G455100.1	-	-	-	-	-	-	-	-	-	-	11.9688524670211	0.0233759342073169
TraesCS5B01G408300.1	-	-	-	-	-	-	67.5901309848088	0.0454838791344166	129.192203170423	0.0209795711401864	11.9655814223239	0.0185928281510788
TraesCS6B01G370600.1	-	-	-	-	-	-	-	-	11.9480041257766	0.0331232206918683	-	-
TraesCS5D01G413600.1	-	-	-	-	11.9225500636921	0.0179845696374827	-	-	94.0030880870921	0.00565784827626059	-	-
TraesCS5A01G377900.1	-	-	-	-	-	-	-	-	11.9200924325826	0.00572937685463393	-	-
TraesCS3B01G166900.1	-	-	-	-	4.51541962417413	0.0149675023258195	5.51487688919115	0.0339153722526781	11.8697282627001	0.00584579221932179	9.63586213345802	0.0214974475647786
TraesCS7B01G394600.1	-	-	-	-	9.22217243866356	0.00461176066676169	-	-	-	-	11.8622214326107	0.00968278565016904
TraesCS6D01G234700.1	-	-	-	-	6.87298474501011	0.0188859660413204	11.8278525828281	0.0494613802240841	14.380230212721	0.00166198932844296	7.17749602571583	0.00954050071343529
TraesCS2B01G123900.1	-	-	-	-	-	-	-	-	-	-	11.8274998810723	0.0247382701984915
TraesCS2A01G292000.1	-	-	-	-	-	-	-	-	11.7923901019596	0.0163742291480795	-	-
TraesCS5D01G302800.1	-	-	-	-	-	-	-	-	11.7840657438748	0.0165682972336484	-	-
TraesCS1B01G384900.1	-	-	-	-	11.7828528194189	0.022763357355643	-	-	-	-	-	-
TraesCS5A01G322200.1	-	-	-	-	-	-	-	-	-	-	11.774229318081	0.0344300665241046
TraesCS6B01G276700.1	-	-	-	-	11.7678667558295	0.026903012417193	11.7538743377034	0.0453998175402177	-	-	-	-
TraesCS1A01G423800.1	-	-	-	-	-	-	4.56737399360416	0.0453998175402177	11.7225436283577	0.00157542220979908	-	-
TraesCS6A01G369800.1	-	-	-	-	-	-	11.72113746	0.0450365869832523	-	-	-	-
TraesCS2A01G153700.1	-	-	-	-	-	-	6.16034225215026	0.0403940347575089	11.7151093270514	0.00565784827626059	5.82634098703113	0.0367191885250636
TraesCS4A01G405300.1	-	-	-	-	11.7092898768516	0.0385239967949782	6.13776006725675	0.0457508407979794	-	-	-	-
TraesCS6D01G314600.1	-	-	-	-	-	-	-	-	11.6692295646723	0.0409276512483725	-	-
TraesCS2D01G107100.1	-	-	-	-	-	-	-	-	-	-	11.6670360946678	0.00954050071343529
TraesCS7D01G220300.1	-	-	-	-	-	-	7.67498674610541	0.0253092233544227	11.6464842513982	0.00142911949979324	-	-
TraesCS7A01G356600.1	-	-	11.6384981938968	0.044812760775888	-	-	-	-	-	-	-	-
TraesCS3B01G277900.1	-	-	-	-	-	-	11.6364085994848	0.0320114540424679	-	-	-	-
TraesCS3D01G484900.1	-	-	-	-	-	-	-	-	-	-	11.5925582498372	0.0363705552495008
TraesCS7A01G496600.1	-	-	-	-	-	-	11.5842577979832	0.0177847121301592	-	-	-	-
TraesCS3B01G165400.1	-	-	-	-	-	-	-	-	11.5813756124345	0.00828901385816002	-	-
TraesCS5B01G157300.1	-	-	-	-	-	-	-	-	11.5370724606921	0.0158904154196353	-	-
TraesCS2A01G220400.1	-	-	-	-	-	-	-	-	11.4866022814842	0.00637731461743952	-	-
TraesCS6B01G400200.1	-	-	-	-	-	-	11.441075593798	0.0176610549034613	-	-	-	-
TraesCS5D01G115100.1	-	-	-	-	11.4351644412073	0.0145894568739034	8.37621161891389	0.0450365869832523	-	-	-	-
TraesCS7B01G315300.1	-	-	-	-	-	-	-	-	11.4132707639351	0.0092085182829636	-	-
TraesCS3D01G182500.1	-	-	-	-	-	-	-	-	11.3380358453931	0.00351093054776107	-	-
TraesCS5A01G033900.1	-	-	-	-	11.7905998729628	0.0325466264573922	-	-	34.7674686494685	0.0110287555703339	11.3251545261549	0.0387525543683187
TraesCS7D01G422500.1	-	-	-	-	-	-	-	-	11.2955886384269	0.00413731158688041	-	-
TraesCS2D01G349000.1	-	-	-	-	-	-	-	-	11.2717012259638	0.0088663385499802	8.63333617477306	0.00819494003979119
TraesCS2A01G301400.1	-	-	-	-	-	-	-	-	11.2714403447006	0.00351093054776107	-	-
TraesCS4D01G329500.1	-	-	-	-	11.2705648503103	0.022763357355643	-	-	26.4496321904763	0.00528152672923659	4.82581965002967	0.0194013139147918
TraesCS5A01G493800.1	-	-	-	-	-	-	11.2446242108601	0.0493112758225585	-	-	-	-
TraesCS4B01G091800.1	-	-	-	-	-	-	-	-	11.2251909417782	0.0465921566304164	-	-
TraesCS4D01G211600.2	-	-	-	-	-	-	11.1927312377863	0.0254374572970106	-	-	-	-
TraesCS7D01G520300.1	-	-	-	-	4.24580279618369	0.0372586167121567	-	-	15.4709951329718	0.00158555499437086	11.1901232844019	0.00941489171809323
TraesCS3A01G365600.1	-	-	-	-	-	-	-	-	6.24785239833544	0.0213201070653792	11.1842839201103	0.022180711549017
TraesCS7D01G492500.1	-	-	-	-	-	-	11.159312699166	0.0125446932335908	-	-	-	-
TraesCS7B01G395400.1	-	-	-	-	11.1592383623582	0.0409705063134516	6.99505969481516	0.0383055887426807	-	-	-	-
TraesCS1D01G189800.2	-	-	-	-	-	-	-	-	11.1577423260025	0.00178760295180901	-	-
TraesCS2A01G583400.1	-	-	-	-	-	-	-	-	11.1355499151088	0.0225145921466629	-	-
TraesCS4B01G210900.1	-	-	-	-	11.1300585791125	0.0345146187062253	20.5284807704304	0.0392227925598455	4.1783880770909	0.00411850959722047	-	-
TraesCS1A01G367200.1	-	-	-	-	-	-	-	-	11.1231426638864	0.0455454885246247	-	-
TraesCS6D01G192500.1	-	-	-	-	-	-	-	-	-	-	11.0986899667327	0.026119753313555
TraesCS7D01G190600.1	-	-	-	-	11.0981323362424	0.014401984965882	7.02313258229558	0.0335703776156374	8.35329432833231	0.00508121713782496	66.8104477609465	0.0163536724261874
TraesCS3D01G340600.1	-	-	-	-	13.0122728719642	0.0450262354392541	34.8368066073996	0.0224626497884446	11.0637592929368	0.00180481268309125	-	-
TraesCS1A01G433300.1	-	-	-	-	-	-	-	-	11.0262588280593	0.00182783287183205	-	-
TraesCS3D01G023100.1	-	-	-	-	-	-	16.0884180902401	0.0330169369708076	11.0217681583017	0.0377287237917197	-	-
TraesCS7B01G059500.1	-	-	-	-	-	-	-	-	-	-	11.011314379932	0.0185431922559843
TraesCS2A01G322500.1	-	-	-	-	-	-	-	-	11.0043470396426	0.0415258622795261	-	-
TraesCS3A01G283800.1	-	-	-	-	-	-	-	-	103.524341819439	0.013549226903685	-	-
TraesCS4D01G055700.1	-	-	-	-	-	-	-	-	100.53448490806	0.0106099005921207	-	-
TraesCS4A01G140500.1	-	-	-	-	-	-	16.7315483802902	0.0338142222370757	10.994113649391	0.00404907803727535	5.39186423095369	0.0363991858478757
TraesCS2D01G598500.1	-	-	-	-	-	-	-	-	10.9641571547476	0.00157542220979908	5.89877837070222	0.0266134929026205
TraesCS3A01G498700.1	-	-	-	-	-	-	-	-	10.9419788523373	0.00637731461743952	-	-
TraesCS2D01G226000.2	-	-	-	-	6.31103905950472	0.0342426266163222	-	-	16.2916863797325	0.0147136120378665	10.9303367022183	0.0393920908423714
TraesCS4B01G206700.1	-	-	-	-	-	-	10.9249433752304	0.0339153722526781	6.9507828702044	0.0355957486863613	-	-
TraesCS3B01G151600.1	-	-	-	-	5.69960433754448	0.0341248319228306	-	-	35.0753528746441	0.00109294445784692	10.9225705990843	0.00677739193474898
TraesCS5B01G362500.1	-	-	-	-	10.914467483372	0.0355819552183196	-	-	5.9536278079902	0.0181336108095328	-	-
TraesCS6B01G406000.1	-	-	-	-	-	-	-	-	10.904941963975	0.0162185049796424	-	-
TraesCS2A01G454700.1	-	-	-	-	-	-	10.876611949772	0.0259156082632666	39.6538272578711	0.00232973685923444	-	-
TraesCS2B01G443500.1	-	-	-	-	-	-	10.8643710030928	0.0453998175402177	-	-	-	-
TraesCS4B01G209400.1	-	-	-	-	-	-	10.8547136853912	0.0218163173919149	7.08757364997716	0.0091547918877506	-	-
TraesCS1B01G245100.1	-	-	-	-	-	-	10.8445822367873	0.0125446932335908	7.98268185282646	0.0134277188199675	-	-
TraesCS6D01G026400.1	-	-	-	-	-	-	-	-	-	-	10.7779826356158	0.0461033511306084
TraesCS3D01G219400.1	-	-	-	-	-	-	10.7751623777334	0.0180873029514452	-	-	-	-
TraesCS6A01G153700.1	-	-	-	-	10.7688018523553	0.0155684352524874	-	-	7.19466601760167	0.00300751713446167	20.4039233631502	0.0132351325740991
TraesCS5D01G018000.1	-	-	-	-	8.86011034532274	0.014401984965882	15.8312009514838	0.0218163173919149	10.7534502202106	0.0217370065697712	12.5022726697684	0.0121342931581661
TraesCS5A01G471700.1	-	-	-	-	-	-	10.7346920152352	0.0339153722526781	33.7013084147641	0.00310353326673568	-	-
TraesCS5D01G407400.1	-	-	-	-	-	-	-	-	10.7338812632893	0.0377287237917197	-	-
TraesCS7D01G374500.1	-	-	-	-	-	-	37.1276787338081	0.0125446932335908	-	-	10.7289417332831	0.0387525543683187
TraesCS3B01G395600.1	-	-	-	-	-	-	-	-	10.7253106202437	0.00158555499437086	6.3884025402533	0.0196184466521331
TraesCS5A01G439300.1	-	-	-	-	-	-	10.7216250047967	0.0334673717509088	-	-	-	-
TraesCS5A01G308900.1	-	-	-	-	-	-	-	-	10.7192827465005	0.00393695082848792	-	-
TraesCS5A01G004400.1	-	-	-	-	-	-	10.7062709755949	0.043076858598645	20.5929324409913	0.00441460445631345	-	-
TraesCS5B01G008800.1	-	-	-	-	-	-	7.66690483583689	0.0496675242682818	10.6702763566776	0.0190335127859296	4.48871015883127	0.0460317369260512
TraesCS7D01G030700.1	-	-	-	-	-	-	-	-	10.6572694176306	0.00954578087684782	-	-
TraesCS2B01G428300.1	-	-	-	-	-	-	-	-	10.6539170471845	0.024249827893257	-	-
TraesCS6A01G254100.1	-	-	-	-	-	-	10.6381021920825	0.0218163173919149	-	-	-	-
TraesCS1A01G015900.1	-	-	-	-	-	-	-	-	10.6127548240437	0.00166803560424531	-	-
TraesCS1D01G278100.1	-	-	-	-	-	-	-	-	6.00488980198688	0.00176101824698598	10.5869170490122	0.0231250032006945
TraesCS5D01G042600.1	-	-	-	-	-	-	10.574997702486	0.0446539443338653	12.1697768241461	0.00564040891890888	-	-
TraesCS6A01G181500.1	-	-	-	-	-	-	18.3275394247522	0.0434755107783714	-	-	10.5712565370023	0.0312372232783147
TraesCS3D01G445400.1	-	-	-	-	-	-	-	-	10.5419183832022	0.00752247526566524	-	-
TraesCS1D01G268900.1	-	-	-	-	-	-	-	-	10.5324352430273	0.0136279862931636	-	-
TraesCS5B01G355800.1	-	-	-	-	-	-	-	-	34.8709989842113	0.0163105866040686	10.5320362102072	0.00569329448722153
TraesCS6A01G223500.1	-	-	-	-	-	-	-	-	7.78219695996699	0.000737085763424642	10.5300388480856	0.0393355092258638
TraesCS7A01G391500.1	-	-	-	-	-	-	10.5089379175418	0.0394714814825615	17.3186147250335	0.0246334768040878	9.61496431424132	0.0157196607032282
TraesCS6B01G365700.1	-	-	-	-	10.496900232267	0.0355819552183196	-	-	28.0995319183726	0.00933515102782456	-	-
TraesCS6A01G400300.1	-	-	-	-	-	-	-	-	34.6830573273155	0.00408616555040517	10.4877307770146	0.0420438817448046
TraesCS5B01G532400.1	-	-	-	-	-	-	-	-	10.4701315359336	0.0019882380195913	-	-
TraesCS6A01G248000.1	-	-	-	-	10.4577977326411	0.00461176066676169	-	-	6.52324099764543	0.00268348734851804	8.08901631771057	0.00569329448722153
TraesCS4D01G061600.1	-	-	-	-	-	-	-	-	-	-	10.4546040924789	0.00774753444603291
TraesCS3A01G165700.1	-	-	-	-	-	-	10.4416355742763	0.0493112758225585	-	-	-	-
TraesCS3A01G345200.1	-	-	-	-	-	-	-	-	-	-	10.4349588584702	0.0460317369260512
TraesCS7A01G215900.1	-	-	-	-	-	-	-	-	10.4273350655258	0.0197009243973991	14.6519529914309	0.0311721242801499
TraesCS2D01G064900.1	-	-	-	-	-	-	-	-	-	-	10.4148035367979	0.00569329448722153
TraesCS2D01G168500.1	-	-	-	-	-	-	-	-	10.4127000542671	0.0282667981139683	-	-
TraesCS6A01G262900.1	-	-	-	-	-	-	-	-	10.4060123548752	0.00624540066787126	-	-
TraesCS3B01G203700.1	-	-	-	-	-	-	-	-	10.384271907849	0.00882404509551131	-	-
TraesCS2B01G077200.1	-	-	-	-	-	-	-	-	10.3694983031432	0.0150020714790005	-	-
TraesCS7D01G524300.1	-	-	-	-	-	-	-	-	-	-	10.3327013123629	0.00790892384604951
TraesCS7D01G532500.1	-	-	-	-	-	-	-	-	10.3147834865447	0.00815216930787373	-	-
TraesCS3A01G215000.1	-	-	-	-	-	-	12.4953741864183	0.0496675242682818	10.3121608464867	0.0331046388057211	-	-
TraesCS2D01G506200.1	-	-	-	-	-	-	-	-	10.2795595226782	0.00100962545383026	5.2909250967613	0.0163826637766808
TraesCS1D01G412000.1	-	-	-	-	-	-	-	-	10.2737869020388	0.0100306566345616	7.9768132551088	0.0452941364947189
TraesCS5A01G234200.1	-	-	-	-	-	-	-	-	10.2713668018315	0.00825130193772357	-	-
TraesCS7D01G063900.1	-	-	-	-	-	-	-	-	4.85243519823003	0.0266315146994554	10.2580033121422	0.0234046210412734
TraesCS3A01G367200.1	-	-	-	-	-	-	-	-	10.2499076591219	0.00351093054776107	4.17733973882634	0.0224723000765385
TraesCS2B01G050900.1	-	-	-	-	-	-	-	-	10.2379686240848	0.0245688437001432	8.84737690244026	0.015639564137279
TraesCS3B01G048700.1	-	-	-	-	-	-	10.2357469133883	0.0450365869832523	-	-	-	-
TraesCS4A01G196500.1	-	-	-	-	-	-	-	-	10.232315906768	0.0125341072012572	-	-
TraesCS3A01G217400.1	-	-	-	-	-	-	-	-	10.2319824655307	0.0423028622637443	-	-
TraesCS7A01G422200.1	-	-	-	-	5.17917493042725	0.0149675023258195	10.1883676319606	0.0292711753860741	-	-	-	-
TraesCS6D01G250600.1	-	-	-	-	-	-	7.37030118904651	0.0450365869832523	10.1870213868877	0.0225572189650893	-	-
TraesCS5A01G512000.1	-	-	-	-	10.1855231329615	0.0188859660413204	-	-	-	-	15.2285421370386	0.0104223566743278
TraesCS1D01G426000.1	-	-	-	-	-	-	10.1832273457212	0.0125446932335908	-	-	-	-
TraesCS6A01G248400.1	-	-	-	-	-	-	-	-	-	-	10.182750227694	0.0471249274358954
TraesCS3D01G325500.1	-	-	-	-	-	-	-	-	10.1543275279105	0.0249376182219439	-	-
TraesCS2A01G107000.1	-	-	-	-	18.3197191768181	0.0188859660413204	30.1773718960888	0.0412026239839115	-	-	10.1512540768386	0.00420190317368451
TraesCS4A01G434800.1	-	-	-	-	-	-	-	-	10.1492204156715	0.0438935380885741	-	-
TraesCS2A01G510900.1	-	-	-	-	-	-	10.1369675541911	0.0383116357819508	-	-	-	-
TraesCS7B01G327400.1	-	-	-	-	-	-	10.0934113375569	0.0382726752223491	-	-	-	-
TraesCS2B01G177500.1	-	-	-	-	-	-	-	-	10.0902902190572	0.00528152672923659	-	-
TraesCS5A01G257100.1	-	-	-	-	-	-	-	-	10.0732964393803	0.0261714267944236	-	-
TraesCS3A01G308600.1	-	-	-	-	6.50600939736489	0.0103219633299842	-	-	33.9436441774368	0.00217379392750952	10.0600776526749	0.0297691486113094
TraesCS2D01G313700.1	-	-	7.79905070134332	0.0320954139588697	-	-	10.0486543929812	0.0412026239839115	6.99997440806292	0.0364466621398996	-	-
TraesCS5A01G155800.1	-	-	-	-	7.6914528174734	0.0450262354392541	-	-	10.0482371267079	0.00861159813286294	12.0431084249237	0.0262159796261525
TraesCS5B01G232600.1	-	-	-	-	10.0400818667341	0.0224152960608494	-	-	-	-	-	-
TraesCS2A01G098800.1	-	-	-	-	-	-	-	-	-	-	10.0337432829203	0.031445768085155
TraesCS4D01G098400.1	-	-	-	-	-	-	-	-	10.0242205435303	0.0104107874439849	-	-
TraesCS7B01G237100.1	-	-	-	-	-	-	-	-	10.0027705144017	0.00158555499437086	4.24450862924978	0.0326216370666783
TraesCS2D01G365100.1	-	-	-	-	-	-	-	-	0.249931857892431	0.00750841361116112	-	-
TraesCS6D01G104800.1	-	-	-	-	-	-	-	-	0.249214127107993	0.026393487143014	-	-
TraesCS7D01G427900.1	-	-	-	-	-	-	-	-	0.249096912825063	0.0331003211967354	-	-
TraesCS4A01G232300.1	-	-	-	-	-	-	-	-	0.248821682100012	0.038425307236332	-	-
TraesCS3A01G535300.1	-	-	-	-	-	-	-	-	0.248733008564592	0.0485238596791875	-	-
TraesCS2B01G624200.1	-	-	-	-	-	-	-	-	-	-	0.248539713288852	0.0363912378872745
TraesCS3A01G455000.1	-	-	-	-	-	-	-	-	0.247697115849113	0.00728205932702777	-	-
TraesCS2B01G172100.1	-	-	-	-	-	-	-	-	0.246819326645995	0.0068346367870872	-	-
TraesCS6D01G136200.1	-	-	-	-	-	-	0.246470892754533	0.0298518928678315	17.3249736899987	0.00351093054776107	-	-
TraesCS2A01G221100.1	-	-	-	-	-	-	-	-	0.245239419021377	0.0324028244572268	-	-
TraesCS3D01G083700.1	-	-	-	-	-	-	-	-	0.248601992690349	0.0152588697958208	0.243941430560808	0.0104563165102806
TraesCS7A01G435500.1	-	-	-	-	-	-	-	-	0.243402520951223	0.0177865965423791	-	-
TraesCS2D01G417800.1	-	-	-	-	-	-	-	-	0.243162105764295	0.0326065792834136	-	-
TraesCS5B01G237500.1	-	-	-	-	-	-	-	-	0.243099261977453	0.0208413627080521	-	-
TraesCS5D01G084200.1	-	-	-	-	-	-	-	-	0.242491738001355	0.0276029789780503	-	-
TraesCS7A01G263100.1	-	-	-	-	-	-	-	-	0.242126935729638	0.00772091188594796	-	-
TraesCS2A01G296400.1	-	-	-	-	-	-	-	-	0.241506013504082	0.0429025586461499	-	-
TraesCS3D01G131000.1	-	-	-	-	-	-	-	-	-	-	0.240732508922738	0.00907149045120558
TraesCS2A01G376600.2	-	-	-	-	-	-	-	-	0.24032691871726	0.0209994337341935	-	-
TraesCS2A01G045000.1	-	-	-	-	-	-	0.238848960892192	0.0202059276076319	-	-	-	-
TraesCS4A01G245100.1	-	-	-	-	0.238793732476182	0.0299106689674914	-	-	-	-	-	-
TraesCS2D01G381100.1	-	-	-	-	-	-	-	-	0.238553025417426	0.0448762817805526	-	-
TraesCS1D01G120300.1	-	-	-	-	-	-	-	-	0.238213840772009	0.00595422304653932	-	-
TraesCS7B01G008300.1	-	-	-	-	-	-	-	-	0.244959114428193	0.0177865965423791	0.238064505616177	0.0182600266614428
TraesCS6B01G259400.1	-	-	-	-	-	-	-	-	0.23799133641798	0.0262243137681546	-	-
TraesCS1A01G058400.1	-	-	-	-	-	-	-	-	-	-	0.237809560086326	0.034156985756805
TraesCS2A01G337300.1	-	-	-	-	-	-	0.236593015046369	0.048581229876749	-	-	-	-
TraesCS1A01G343700.1	-	-	-	-	-	-	-	-	0.236520435652363	0.0174138812607494	-	-
TraesCS2D01G373000.1	-	-	-	-	-	-	-	-	0.23557119580638	0.0278268305816015	-	-
TraesCS3A01G292800.1	-	-	-	-	-	-	-	-	0.235243033936882	0.0406900529851327	-	-
TraesCS4D01G073600.1	-	-	0.234846639566844	0.00611807580265285	-	-	-	-	-	-	-	-
TraesCS6B01G160600.1	-	-	-	-	-	-	0.232623680886408	0.0326354063612852	-	-	-	-
TraesCS2D01G301600.1	-	-	-	-	-	-	-	-	0.232405638049578	0.0116546946604231	-	-
TraesCS6B01G061900.1	-	-	-	-	-	-	-	-	0.23168870175434	0.0459527395306173	-	-
TraesCS2D01G151400.1	-	-	-	-	-	-	-	-	0.230913597530764	0.0331003211967354	-	-
TraesCS2D01G294300.1	-	-	-	-	-	-	-	-	0.230580459487546	0.0345592844600655	-	-
TraesCS1A01G119500.1	-	-	-	-	-	-	-	-	0.22852405919928	0.0326065792834136	-	-
TraesCS4B01G287100.1	-	-	-	-	-	-	0.22765423428203	0.026852964410875	-	-	-	-
TraesCS3A01G490300.1	-	-	-	-	-	-	-	-	0.227386954030601	0.0315953597859497	-	-
TraesCS6D01G216000.1	-	-	0.226908170859946	0.0217476827070708	-	-	-	-	-	-	-	-
TraesCS7D01G403200.1	-	-	-	-	-	-	-	-	0.226496655310454	0.0345592844600655	-	-
TraesCS7D01G263800.1	-	-	-	-	-	-	-	-	-	-	0.226424974911776	0.0355148256680894
TraesCS3D01G522000.1	-	-	0.225685858199832	0.0291485467677092	-	-	-	-	-	-	-	-
TraesCS3B01G256800.1	-	-	-	-	-	-	0.225233341734708	0.0474229554496438	-	-	-	-
TraesCS7A01G019400.1	-	-	-	-	-	-	0.224755095018979	0.0356989198635811	-	-	-	-
TraesCS4A01G349400.1	-	-	-	-	0.224745879545694	0.031621481572242	-	-	-	-	0.245045387122824	0.0422553913489645
TraesCS6B01G454500.1	-	-	-	-	-	-	0.224704280210823	0.0356989198635811	-	-	-	-
TraesCS3A01G299500.1	-	-	-	-	-	-	-	-	0.222944886800223	0.0406900529851327	-	-
TraesCS5A01G384600.1	-	-	-	-	-	-	-	-	0.222779741331003	0.0174138812607494	-	-
TraesCS4A01G324400.1	-	-	-	-	-	-	-	-	0.220971525168967	0.0299999724625146	-	-
TraesCS5A01G449200.1	-	-	-	-	-	-	-	-	0.220710819338436	0.0389126205508311	-	-
TraesCS5D01G428400.1	-	-	-	-	-	-	-	-	-	-	0.220389657434568	0.0102475051139541
TraesCS7A01G161900.1	-	-	-	-	-	-	-	-	-	-	0.219436828822695	0.0291453486923355
TraesCS6D01G218600.1	-	-	-	-	-	-	-	-	0.219197110362112	0.0445354792394666	-	-
TraesCS6B01G326000.1	-	-	-	-	-	-	0.217927623804685	0.0222026012654618	-	-	-	-
TraesCS4A01G140800.1	-	-	-	-	-	-	-	-	0.217338461844936	0.0267689196540695	-	-
TraesCS3D01G357900.1	-	-	-	-	-	-	-	-	0.216783957282378	0.00583566736810201	-	-
TraesCS2A01G309100.1	-	-	-	-	-	-	-	-	0.216757617921677	0.0396286529681279	4.00012434215741	0.0478470796318099
TraesCS4B01G221100.1	-	-	-	-	-	-	-	-	0.216254889265379	0.00655476538525142	-	-
TraesCS7A01G211100.1	-	-	-	-	-	-	-	-	0.215694656793258	0.0459793078235904	-	-
TraesCS2A01G267000.1	-	-	-	-	-	-	-	-	0.215534590023461	0.0278268305816015	-	-
TraesCS4D01G169100.1	-	-	-	-	-	-	-	-	-	-	0.215381134210757	0.0164521351030742
TraesCS7A01G438500.1	-	-	-	-	-	-	0.213043651397633	0.0437647849382143	-	-	-	-
TraesCS3B01G173800.1	-	-	-	-	0.239906877439606	0.0244468149602568	-	-	-	-	0.212428010760105	0.0100078069246021
TraesCS1B01G381600.1	-	-	-	-	-	-	-	-	0.211620943877134	0.00655476538525142	-	-
TraesCS2D01G567400.1	-	-	-	-	-	-	0.210778442529435	0.0488857560626608	-	-	-	-
TraesCS6B01G189300.1	-	-	-	-	-	-	-	-	-	-	0.210249621083789	0.0291453486923355
TraesCS7D01G140400.1	-	-	-	-	-	-	-	-	0.208935281324965	0.0343363201352401	-	-
TraesCS4A01G237400.1	-	-	-	-	-	-	0.208734495356712	0.0274004150331243	-	-	-	-
TraesCS6B01G122600.1	-	-	-	-	-	-	-	-	-	-	0.208345699501555	0.0123979289870885
TraesCS6A01G214800.1	-	-	-	-	-	-	-	-	-	-	0.207843635036147	0.0304475326503901
TraesCS6B01G370300.1	-	-	-	-	-	-	-	-	0.206438100781183	0.0276029789780503	-	-
TraesCS6A01G151200.1	-	-	-	-	0.216795127747515	0.0339131991317447	0.206379117877297	0.0356989198635811	-	-	-	-
TraesCS1A01G056200.1	-	-	-	-	-	-	-	-	0.206026656189085	0.0177865965423791	-	-
TraesCS5B01G242000.1	-	-	-	-	-	-	-	-	0.204979861214556	0.0406900529851327	-	-
TraesCS5B01G076600.1	-	-	-	-	-	-	0.204465390228113	0.026852964410875	-	-	-	-
TraesCS1B01G376300.1	-	-	-	-	-	-	-	-	0.202277562676178	0.0455044982340495	-	-
TraesCS3D01G497700.1	-	-	-	-	-	-	-	-	0.202277562676177	0.0455044982340495	-	-
TraesCS2D01G453700.1	-	-	-	-	-	-	-	-	0.202275265672808	0.00753190534192591	-	-
TraesCS1B01G470800.1	-	-	-	-	-	-	-	-	0.201795075945571	0.0455044982340495	-	-
TraesCS6B01G415000.1	-	-	-	-	-	-	-	-	0.20092771439592	0.0276029789780503	-	-
TraesCS3B01G347700.1	-	-	-	-	-	-	-	-	0.199023362448482	0.0445354792394666	-	-
TraesCS7A01G262200.1	-	-	-	-	-	-	-	-	0.199019587383104	0.0354925754806483	0.211502543954887	0.0307630046445866
TraesCS7B01G227800.1	-	-	-	-	-	-	-	-	0.198668428460704	0.0428467916608058	0.227695707064317	0.0408403845467684
TraesCS7A01G476300.1	-	-	-	-	0.198542153162348	0.0250343100334908	-	-	-	-	-	-
TraesCS4A01G227800.1	-	-	-	-	-	-	-	-	-	-	0.198400449986216	0.0342253483214706
TraesCS5D01G463600.1	-	-	-	-	-	-	-	-	0.198317583889356	0.0407039665638696	-	-
TraesCS5D01G107500.1	-	-	-	-	-	-	-	-	0.197287800611771	0.0406900529851327	-	-
TraesCS5B01G315600.1	-	-	-	-	-	-	-	-	-	-	0.196799160323894	0.0415533495570072
TraesCS5A01G106500.1	-	-	-	-	-	-	-	-	-	-	0.196695332497006	0.0320899078047612
TraesCS4B01G043000.1	-	-	-	-	-	-	-	-	0.1965539201519	0.0455044982340495	0.233041525585724	0.0350284394289913
TraesCS6B01G183000.1	-	-	-	-	-	-	-	-	-	-	0.195392250846144	0.0345095723385124
TraesCS2D01G219800.1	-	-	-	-	-	-	-	-	-	-	0.194493257434616	0.0363762627454591
TraesCS3B01G132700.1	-	-	-	-	0.19442507663494	0.0492500239631543	-	-	-	-	-	-
TraesCS1D01G317300.1	-	-	-	-	-	-	-	-	-	-	0.193091893186894	0.0386750441593044
TraesCS5B01G273000.1	-	-	-	-	-	-	-	-	0.192669619570894	0.00574220250136354	-	-
TraesCS7B01G280100.1	-	-	-	-	-	-	0.192623295894157	0.0335467826495034	-	-	-	-
TraesCS7B01G194600.1	-	-	-	-	0.19200138246209	0.0186583197465714	-	-	-	-	0.193793913669028	0.0168156433941831
TraesCS2A01G002700.1	-	-	-	-	0.191584388634457	0.0250343100334908	-	-	-	-	-	-
TraesCS4A01G111600.1	-	-	-	-	-	-	-	-	-	-	0.190560129856406	0.0191202621958181
TraesCS6D01G141400.1	-	-	-	-	0.19031814092137	0.0250343100334908	-	-	-	-	-	-
TraesCS2B01G496600.1	-	-	0.189490807809929	0.0397044830716008	-	-	-	-	-	-	-	-
TraesCS7B01G074100.1	-	-	0.18879578258573	0.048711083366478	-	-	-	-	-	-	-	-
TraesCS5D01G246000.1	-	-	-	-	-	-	-	-	0.187016605389656	0.0278268305816015	-	-
TraesCS3B01G579200.1	-	-	-	-	-	-	-	-	0.186817167039754	0.0444714390055529	-	-
TraesCS7B01G026100.1	-	-	-	-	-	-	-	-	0.185919664410646	0.0145116483929379	-	-
TraesCS6D01G090900.1	-	-	-	-	-	-	-	-	0.18403216854701	0.0455044982340495	-	-
TraesCS1A01G352500.1	-	-	-	-	-	-	-	-	0.18382145091744	0.0255021370007576	-	-
TraesCS6D01G156800.1	-	-	-	-	-	-	-	-	0.179970930369537	0.0191019464860142	-	-
TraesCS7B01G354000.1	-	-	-	-	0.179412821039662	0.0453491139098754	-	-	-	-	-	-
TraesCS7A01G411300.1	-	-	-	-	-	-	0.179112932994608	0.0356989198635811	-	-	-	-
TraesCS5B01G104100.1	-	-	-	-	-	-	-	-	0.179052722654109	0.0388883361259109	-	-
TraesCS3D01G254700.1	-	-	-	-	-	-	-	-	-	-	0.178277716224898	0.0164521351030742
TraesCS5B01G174200.1	-	-	-	-	-	-	-	-	-	-	0.174096166456183	0.0440934489116676
TraesCS5A01G201900.1	-	-	-	-	-	-	-	-	0.173488187837529	0.0459527395306173	-	-
TraesCS4D01G295200.1	-	-	-	-	-	-	-	-	0.173469449176946	0.0497880244532522	-	-
TraesCS2B01G489900.1	-	-	-	-	-	-	-	-	0.17326279038456	0.00806358698095856	-	-
TraesCS1A01G158600.2	-	-	-	-	-	-	-	-	-	-	0.172837858329954	0.0144548751284326
TraesCS6A01G094200.1	-	-	-	-	-	-	-	-	-	-	0.172691738794527	0.0163412148937137
TraesCS5B01G224800.1	-	-	-	-	-	-	-	-	-	-	0.17231754694588	0.04571994182641
TraesCS1B01G011400.1	-	-	-	-	-	-	-	-	0.172049279812714	0.0455752663759747	-	-
TraesCS5B01G196900.1	-	-	-	-	-	-	-	-	0.17049383753466	0.0357191801730112	0.21540689306782	0.034233702997617
TraesCS7A01G545200.1	-	-	-	-	0.169037291976586	0.0234404371539141	-	-	-	-	-	-
TraesCS2D01G368600.1	-	-	-	-	-	-	-	-	0.168879261207039	0.0455044982340495	-	-
TraesCS6D01G088600.1	-	-	-	-	-	-	-	-	-	-	0.166807032248601	0.0373250246948015
TraesCS6A01G044800.1	-	-	-	-	-	-	-	-	0.208080163428911	0.0485238596791875	0.166173707948542	0.0291453486923355
TraesCS7A01G115300.1	-	-	-	-	-	-	-	-	-	-	0.165689467194437	0.00551138274798501
TraesCS2B01G329600.1	-	-	-	-	-	-	-	-	0.183452946433934	0.0244857204647753	0.165649657773367	0.0185608695223247
TraesCS5D01G311200.1	-	-	-	-	-	-	-	-	0.16546241277946	0.0306028778290148	-	-
TraesCS1A01G364200.1	-	-	-	-	-	-	-	-	0.163717465858636	0.0485238596791875	-	-
TraesCSU01G130400.1	-	-	-	-	-	-	-	-	-	-	0.163190147523215	0.0216534628238887
TraesCSU01G176800.1	-	-	-	-	-	-	0.163067921615354	0.0218570360023661	-	-	-	-
TraesCS6D01G151500.1	-	-	-	-	-	-	-	-	0.162889674725677	0.0102318245320471	-	-
TraesCS4D01G120400.1	-	-	-	-	-	-	-	-	0.162663473470645	0.00655476538525142	-	-
TraesCS4D01G177600.1	-	-	-	-	-	-	-	-	0.161848903803801	0.0304136311015956	-	-
TraesCS1D01G444100.1	-	-	-	-	-	-	-	-	0.160063982893381	0.0437338857883985	-	-
TraesCS1B01G019300.1	-	-	-	-	-	-	0.159438974729966	0.0381188435698848	-	-	-	-
TraesCS2A01G202600.1	-	-	-	-	-	-	-	-	0.159335673595864	0.0104134803190975	-	-
TraesCS7B01G300300.1	-	-	-	-	-	-	-	-	0.158066291329339	0.0445354792394666	-	-
TraesCS6B01G261400.1	-	-	-	-	-	-	-	-	0.15785597983171	0.0304136311015956	-	-
TraesCS2A01G248000.1	-	-	-	-	-	-	-	-	0.156095721584953	0.0381711646219657	-	-
TraesCS5D01G368500.1	-	-	-	-	-	-	-	-	0.154659131944401	0.00326330900066192	-	-
TraesCS6B01G248400.1	-	-	-	-	-	-	-	-	0.154003998753368	0.00583566736810201	-	-
TraesCS3A01G308100.1	-	-	-	-	0.238930721699606	0.0400809645609494	-	-	0.187950975769304	0.0102318245320471	0.153617462742502	0.0278780095631471
TraesCS4D01G115400.1	-	-	-	-	-	-	-	-	0.153493509049865	0.0468731884414793	-	-
TraesCS7A01G374800.1	-	-	0.153203066420484	0.0291485467677092	-	-	-	-	-	-	-	-
TraesCS4B01G243700.1	-	-	-	-	-	-	-	-	0.152588264979866	0.0255337102267242	-	-
TraesCS5A01G050000.1	-	-	-	-	-	-	-	-	0.152397178896366	0.0081474574292232	0.206988340593469	0.00907149045120558
TraesCS3A01G116700.1	-	-	-	-	-	-	-	-	-	-	0.152256976065691	0.0397326362529524
TraesCS6A01G093700.1	-	-	-	-	-	-	-	-	0.151292365586737	0.0278268305816015	0.199940844955699	0.0291453486923355
TraesCS5B01G072300.1	-	-	-	-	-	-	0.151132454712977	0.0395230237268379	-	-	-	-
TraesCS5D01G234600.1	-	-	-	-	-	-	-	-	0.148056542080749	0.0381711646219657	-	-
TraesCS6D01G094700.1	-	-	4.97382282590146	0.0277072266478419	-	-	-	-	-	-	0.147493846594444	0.0350284394289913
TraesCSU01G020500.1	-	-	-	-	-	-	0.147157228661077	0.0376727378335602	-	-	-	-
TraesCS4B01G211600.1	-	-	-	-	-	-	-	-	0.146975704241804	0.0389577438664969	0.165983026028732	0.0363912378872745
TraesCS3B01G468800.1	-	-	-	-	-	-	-	-	-	-	0.146968488286671	0.0101208651916043
TraesCS2A01G492500.1	-	-	6.21633830820268	0.0277072266478419	-	-	-	-	0.145380411449466	0.0354925754806483	-	-
TraesCS7B01G105600.1	-	-	-	-	-	-	0.144800432898535	0.0377825522644815	-	-	-	-
TraesCS3D01G134400.1	-	-	-	-	-	-	-	-	0.144430325458057	0.0196601808276373	-	-
TraesCS2B01G457600.1	-	-	0.143978132479538	0.00780471328876762	-	-	-	-	-	-	-	-
TraesCS1B01G433300.1	-	-	-	-	-	-	0.187327517058794	0.0474018995189708	0.143173234956486	0.0486855477787227	-	-
TraesCS2A01G513500.1	-	-	-	-	-	-	-	-	-	-	0.14285674225776	0.0363912378872745
TraesCS4B01G101300.1	-	-	-	-	-	-	-	-	0.14255611348534	0.0479508102621835	-	-
TraesCS1D01G333200.1	-	-	-	-	-	-	-	-	0.142544296154204	0.00481006716223122	-	-
TraesCS4D01G319100.1	-	-	-	-	0.14127166262399	0.0223073972576315	0.235742537732722	0.0477469074625155	-	-	-	-
TraesCS1B01G344300.1	-	-	-	-	0.221694900163616	0.0234404371539141	-	-	0.181946700446341	0.0102318245320471	0.140916005033036	0.00907149045120558
TraesCS4D01G223400.1	-	-	-	-	-	-	-	-	0.140703239153371	0.0452870687361016	-	-
TraesCS1D01G288600.1	-	-	-	-	0.140643121576629	0.0186583197465714	-	-	-	-	-	-
TraesCS1D01G212400.1	-	-	-	-	-	-	-	-	0.140331084034507	0.0367495973520179	-	-
TraesCS4B01G156500.1	-	-	-	-	0.148218897395555	0.0469615929987855	-	-	0.13967542247644	0.00474712291829264	-	-
TraesCS5D01G023600.1	-	-	-	-	-	-	-	-	0.138913044780023	0.0331003211967354	-	-
TraesCS6B01G078200.1	-	-	-	-	-	-	-	-	0.137803081475154	0.0396815794400997	-	-
TraesCS6D01G242600.1	-	-	-	-	-	-	-	-	0.136678240009922	0.0326065792834136	-	-
TraesCS4D01G156100.1	-	-	-	-	-	-	-	-	0.136198390275922	0.0324028244572268	0.171551195800184	0.0304475326503901
TraesCS2B01G456100.1	-	-	-	-	-	-	-	-	0.136102264165735	0.0221359517656107	0.228032618904605	0.0223411891852
TraesCS6B01G047800.1	-	-	-	-	-	-	-	-	0.135363782935558	0.00655476538525142	-	-
TraesCS1A01G071500.1	-	-	-	-	-	-	-	-	0.13448308809605	0.00326330900066192	-	-
TraesCS6B01G221100.1	-	-	-	-	-	-	-	-	0.133686817354136	0.0304946759795014	-	-
TraesCS1D01G426800.1	-	-	-	-	-	-	-	-	-	-	0.132965507739675	0.039252824352006
TraesCS6A01G094300.1	-	-	-	-	-	-	-	-	-	-	0.132587459708659	0.00446542901494709
TraesCS5A01G071900.1	-	-	-	-	-	-	-	-	0.132504843528976	0.0258231324198575	-	-
TraesCS3D01G501700.1	-	-	-	-	-	-	-	-	0.131494254999582	0.029248939060833	-	-
TraesCS5B01G266200.1	-	-	-	-	-	-	-	-	0.130628302036727	0.0304136311015956	-	-
TraesCS1D01G086300.1	-	-	-	-	-	-	-	-	-	-	0.130125556143822	0.0164521351030742
TraesCS5B01G027300.1	-	-	-	-	0.12979720070521	0.0250343100334908	-	-	-	-	-	-
TraesCS7A01G506100.1	-	-	-	-	0.208433087878375	0.0492500239631543	0.129451686101831	0.0377825522644815	-	-	-	-
TraesCS6A01G296200.1	-	-	-	-	0.129222431515276	0.0116682505464274	0.13582168871036	0.026852964410875	-	-	-	-
TraesCS6B01G264500.1	-	-	-	-	-	-	-	-	0.128160583919264	0.0304136311015956	-	-
TraesCS7D01G352400.1	-	-	-	-	-	-	-	-	-	-	0.12766746702805	0.00907149045120558
TraesCS6D01G122800.1	-	-	-	-	-	-	-	-	0.126890001007237	0.0255021370007576	-	-
TraesCS2B01G301800.1	-	-	-	-	-	-	-	-	0.125940411473936	0.0306028778290148	-	-
TraesCS3A01G359900.1	-	-	-	-	-	-	-	-	-	-	0.125937581539604	0.0291453486923355
TraesCS1B01G174600.1	-	-	-	-	-	-	-	-	-	-	0.125220419141489	0.00907149045120558
TraesCS1A01G089600.1	-	-	-	-	-	-	0.122191690046778	0.0356989198635811	-	-	-	-
TraesCS1D01G155900.1	-	-	-	-	-	-	-	-	-	-	0.120269609986074	0.00907149045120558
TraesCS1D01G362900.1	-	-	-	-	-	-	0.120227890550766	0.0356989198635811	-	-	-	-
TraesCS7D01G220100.1	-	-	-	-	-	-	-	-	0.118932784801493	0.0406900529851327	-	-
TraesCS5D01G017700.1	-	-	-	-	-	-	0.118196944731912	0.0356989198635811	-	-	-	-
TraesCS6D01G297900.1	-	-	-	-	-	-	-	-	0.117767938047305	0.0311849141149039	-	-
TraesCS7A01G324100.1	-	-	-	-	-	-	0.1177601839333	0.0360744632652642	-	-	-	-
TraesCS2A01G026600.1	-	-	-	-	-	-	-	-	0.117173433214654	0.0344074587000683	-	-
TraesCS1B01G187500.1	-	-	-	-	-	-	-	-	-	-	0.116791383983391	0.039252824352006
TraesCS2B01G040000.1	-	-	-	-	-	-	-	-	0.116724261394287	0.0139529061065084	-	-
TraesCS4B01G356300.1	-	-	-	-	0.116233953839295	0.0448431479676272	-	-	-	-	-	-
TraesCS7A01G357800.1	-	-	-	-	-	-	0.115877740125933	0.0380869479518536	0.117254474007527	0.0208413627080521	0.168786143314433	0.0218908486573392
[truncated: 168 more rows]
