# Supplementary material for: Comparative transcriptome profiling of a resistant vs susceptible bread wheat (Triticum aestivum L.) cultivar in response to water deficit and cold stress
Source: PeerJ. 2021 May 12;9:e11428. doi: 10.7717/peerj.11428 (PMC8123233; doi:10.7717/peerj.11428)
Supplement: Supplemental Information 4 [file peerj-09-11428-s004.xlsx]

## Sheet: S4_all genes expression_
Table S3
Summary expression all gene Triticum aestivum
The value of gene expression is calculated by the formula ((x / sum_red) * 1,000,000) where
x - the number of reads mapped to the gene
sum_red - the total number of mapped reads in the library
Geneid	Chr	S29 control replic 1	S29 control replic 2	S29 control replic 3	S29 cold 24h replic 1	S29 cold 24h replic 2	S29 cold 24h replic 3	S29 cold 6h replic 1	S29 cold 6h replic 2	S29 cold 6h replic 3	S29 WD replic 1	S29 WD replic 2	S29 WD replic 3	YP control replic 1	YP control replic 2	YP control replic 3	YP cold 24h replic 1	YP cold 24h replic 2	YP cold 24h replic 3	YP cold 6h replic 1	YP cold 6h replic 2	YP cold 6h replic 3	YP WD replic 1	YP WD replic 2	YP WD replic 3
TraesCS1A01G000100.1	chr1A	2.473483553289027e-09	6.347521304481738e-09	7.1184896943792975	5.914176035215026e-09	61.42619064355897	11.350941954838477	5.766194116988381	11.002670661507038	9.198546275496152e-09	8.017641040068964e-09	3.0471408681585497	37.06083487196847	2.269075847732672e-09	16.938229422909217	5.6804072338155415e-09	4.640101779475899	23.620175290123562	5.7353956663200974e-09	41.00450418589636	4.928709395712528	6.714414427517966	5.7701962301825125	29.394360011047826	4.500508380097159e-09
TraesCS1A01G000200.1	chr1A	1.00557508942124e-09	18.063740537297253	2.893965433606029e-09	4.808722573093213	34.33695353030485	4.614635280705362	2.344200412046678	8.946096701612113	3.739595915739089e-09	3.2595082732990643e-09	1.2387909124518344e-09	18.080145609834283	9.224747605268337e-10	2.295367540148784	2.3093244384866702	3.7727930337622313	12.003243283516365	13.99007728186014	20.004066527405996	2.0037276495242625e-09	4.09453776936942	4.6916548764007	17.925065332346158	1.8296459302264149e-09
TraesCS1A01G000300.1	chr1A	2.173667365011569e-09	5.578124782726376e-09	6.255642452441316e-09	5.197306212764718e-09	6.747573971365683e-09	4.987535098874654e-09	5.067261491680103e-09	9.669013601958383e-09	8.083570969375405e-09	7.045805762484846e-09	2.6777904572191165e-09	6.5137224913462595e-09	1.9940363510378022e-09	4.961703566673042e-09	4.99187302365608e-09	4.077665196067822e-09	5.189280933654068e-09	5.040196191614631e-09	7.2068522494131415e-09	4.33129007068881e-09	2.9502730045554843e-09	5.070778500241126e-09	6.457851818994529e-09	3.954992212812655e-09
TraesCS1A01G000400.1	chr1A	2.173667367185237	5.578124788304501	6.255642452441316e-09	5.197306212764718e-09	6.747573971365683e-09	4.987535098874654e-09	5.067261491680103e-09	9.669013601958383e-09	8.083570969375405e-09	7.045805762484846e-09	2.6777904572191165e-09	6.513722497859982	1.9940363530318386	9.923407138307786	4.99187302365608e-09	4.077665196067822e-09	5.189280938843349	5.040196191614631e-09	7.2068522494131415e-09	4.33129007068881e-09	2.9502730045554843e-09	5.070778500241126e-09	6.457851818994529e-09	3.954992212812655e-09
TraesCS1A01G000500.1	chr1A	1.273331770036363e-10	3.267658896390007e-10	0.7329095894690468	0.30445758318239086	3.1621766781003733	2.045184511250829	1.1873583143236566	5.664096725407573e-10	1.420603892724715	0.4127424681559376	0.4705939444137153	0.3815730930699043	1.1681041346316123e-10	1.162624031298067	1.1696933241787004	1.6720840125909402	2.127912241145567	2.066778675318295	3.377412415531767	0.7611793795404581	0.5184799305592047	1.4852280225570205	4.161302148830988	2.3168297578014962e-10
TraesCS1A01G000600.1	chr1A	0.42458349725079303	1.9067611681921797	0.9164382484352414	1.2689904188587977	4.613024099793249	1.7048808734037657	2.227028932713892	1.8886531012821859	0.3947419566434258	1.7203258071987177	0.7845811567839148	3.4989035483661306	0.19474804227370657	0.9691719563763891	1.2188312136816617	1.3938615494633455	2.534061883343275	1.9690079172596677	3.5192948344126047	1.4805577208563676	1.8729043195437285	2.9714328471498512	4.0995997821532155	0.38626527056648297
TraesCS1A01G000700.1	chr1A	1.7078815010805185e-09	4.382812329285009e-09	4.915147641203892e-09	4.08359773860085e-09	5.3016652632158945e-09	3.918777577687229e-09	3.981419743462938e-09	7.597082115824443e-09	6.351377190223531e-09	5.53599024195238e-09	2.1039782163864486e-09	5.1179248146292036e-09	1.5667428472439876e-09	3.898481373814533e-09	3.922185947158349e-09	3.2038798001143114	4.077292162156768e-09	3.960154150554352e-09	5.66252676739604e-09	3.4031564841126362e-09	2.3180716464364523e-09	3.984183107332313e-09	5.074026434284014	3.107493881495657e-09
TraesCS1A01G000800.1	chr1A	1.7078815010805185e-09	4.382812329285009e-09	4.915147641203892e-09	4.08359773860085e-09	5.301665268517559	3.918777577687229e-09	3.981419743462938e-09	7.597082115824443e-09	6.351377190223531e-09	5.53599024195238e-09	2.103978218490427	5.11792481974713	1.5667428472439876e-09	3.898481373814533e-09	3.922185947158349e-09	3.2038797969104314e-09	8.154584328390827	7.920308305068858	5.662526773058566	3.4031564841126362e-09	2.3180716464364523e-09	3.984183107332313e-09	5.074026434284014	3.107493881495657e-09
TraesCS1A01G000900.1	chr1A	1.3979627707612643	0.7174980780105832	2.4139356548216275	2.0055434547929685	2.603762845600196	1.9245966975221374	3.9107232480203207	1.2436972900187688	2.0795327666564796	3.6251265690448684	0.34443645153286334	5.864889156103703	0.25648713592484024	4.467467179119479	1.9262706217237568	3.1469897707249563	2.669928865622455	4.538141136363688	2.780989760228473	4.456970640642271	4.553821129974871	2.6089583628377992	4.983928949054237	1.0174384476333258
TraesCS1A01G001000.1	chr1A	2.173667367185237	5.578124782726376e-09	6.255642452441316e-09	5.197306212764718e-09	6.747573971365683e-09	4.987535098874654e-09	5.067261491680103e-09	9.669013601958383e-09	8.083570969375405e-09	7.045805762484846e-09	2.6777904572191165e-09	6.5137224913462595e-09	1.9940363510378022e-09	4.961703566673042e-09	4.99187302365608e-09	4.077665196067822e-09	5.189280933654068e-09	5.040196191614631e-09	7.2068522494131415e-09	4.33129007068881e-09	2.9502730045554843e-09	5.070778500241126e-09	6.457851818994529e-09	3.954992212812655e-09
TraesCS1A01G001100.1	chr1A	2.173667365011569e-09	11.156249571030875	6.255642458696959	5.197306217962025	13.495147949478941	14.962605301611497	5.067261496747365	9.669013611627395	8.083570969375405e-09	14.091611532015499	2.6777904572191165e-09	26.054889971898763	1.9940363530318386	4.961703571634745	9.983746052304035	4.077665200145487	5.189280933654068e-09	5.040196191614631e-09	7.206852256619993	8.66258014570891	8.850819016616727	5.070778505311905	19.37355546344144	3.9549922167676472
TraesCS1A01G001200.1	chr1A	4.946967109051538	6.347521310829259	7.1184896943792975	11.828352076344226	30.713095325618625	5.675470974581503e-09	5.766194116988381	11.002670661507038	9.198546275496152e-09	8.017641048086606	6.094281733269958	22.23650092614595	6.80722754546709	5.646076472421048e-09	5.680407239495948	4.6401017748357975e-09	23.620175290123562	5.7353956663200974e-09	32.80360335035727	4.928709390783818e-09	3.3572072154375863	5.7701962301825125	7.34859000092481e-09	4.500508384597667
TraesCS1A01G001300.1	chr1A	1.6681633266367857e-09	8.56177292660509	4.800841882106126e-09	7.9772607026507565	5.178370722210873e-09	3.827643215415431e-09	3.8888285905270474	14.840811582519319	6.203670750142935	5.407246282837208e-09	2.0550484904239734e-09	4.9989033073122464e-09	1.5303069686058297	3.807819016283962e-09	3.8309723204802475e-09	3.129370964424142e-09	3.982471414199633e-09	3.8680575424019255e-09	5.53084010391767	3.3240133100635048e-09	2.2641630034960692e-09	3.8915276901230893	4.956025814577197e-09	3.0352265819259905e-09
TraesCS1A01G001400.1	chr1A	2.173667365011569e-09	5.578124782726376e-09	6.255642452441316e-09	5.197306212764718e-09	6.747573971365683e-09	4.987535103862189	5.067261491680103e-09	9.669013601958383e-09	8.083570969375405e-09	7.045805762484846e-09	2.6777904572191165e-09	6.513722497859982	1.9940363510378022e-09	4.961703566673042e-09	4.99187302365608e-09	4.077665200145487	5.189280933654068e-09	5.040196191614631e-09	7.2068522494131415e-09	4.33129007068881e-09	2.9502730075057575	5.070778500241126e-09	6.457851818994529e-09	3.954992212812655e-09
TraesCS1A01G001500.1	chr1A	1.5370933509724668e-09	3.944531096356509e-09	4.423632881507135	3.675237964740766e-09	9.542997478560109	3.5268998199185057e-09	3.583277769116644e-09	6.837373911079373	5.716239476917418	4.982391217757142e-09	1.8935803966413842	23.030661670437553	1.410068562519589e-09	7.017266476374792	3.5299673524425146e-09	2.8834918201028796	3.6695629496106537	3.564138739063056	5.096274090656436e-09	3.062840838764213	4.172528965671877	10.75729439338301	9.133247577144601	2.7967444933460915e-09
TraesCS1A01G001600.1	chr1A	10.459805694009384	9.66320644580966	7.224598089506385	2.0007776357264047	27.274542359955795	10.560127783217624	0.9753575272417156	3.722225588097846	7.779716715439596	8.137152217006221	9.793111828180674	26.329285275736357	3.454348131507631	9.55039507096083	4.804232949845669	4.709267258978564	15.981505507624982	8.731331446327184	5.548762459133666	2.501088434394117	3.4072498347337032	5.856206927372462	12.430213807084726	3.0450620544368547
TraesCS1A01G001700.1	chr1A	2.173667365011569e-09	5.578124782726376e-09	6.255642452441316e-09	10.394612430726744	6.747573971365683e-09	4.987535098874654e-09	5.067261496747365	9.669013601958383e-09	8.083570977458976	7.045805762484846e-09	2.6777904572191165e-09	6.513722497859982	1.9940363510378022e-09	4.961703566673042e-09	4.99187302365608e-09	4.077665196067822e-09	5.189280933654068e-09	5.0401961966548265	7.2068522494131415e-09	4.33129007068881e-09	2.9502730075057575	5.070778500241126e-09	6.457851818994529e-09	3.954992212812655e-09
TraesCS1A01G001800.1	chr1A	113.1191885553238	95.29707870105254	108.51602066779876	76.49698843561627	62.071709233938314	70.78768842233008	61.26453672640578	96.57034293325131	65.86321939596475	83.33380001566599	117.53604326407633	83.88867559158999	129.97587740940938	108.23978285268211	174.49909407869154	110.3892531098423	92.74576790939714	123.19934425671208	64.40247258116311	81.96487333884592	73.6654449773533	111.95201949161206	123.90503122967998	134.09523597404058
TraesCS1A01G001900.1	chr1A	2.1021791188812636e-10	5.394669685671552e-10	6.049904944236637e-10	5.026375594891311e-10	6.52565766686945e-10	4.823503498423224e-10	4.900607824907166e-10	9.351016085254444e-10	7.817715981453908e-10	6.814081118391401e-10	2.5897224545557723e-10	6.299497166818103e-10	1.9284558653800958e-10	4.798521521660349e-10	4.827698756189697e-10	3.94355767903661e-10	5.018614253647862e-10	4.874432656820402e-10	6.969831058533713e-10	4.1888412601581783e-10	2.853243511406639e-10	4.904009165000374e-10	6.245463986458402e-10	3.824919202882965e-10
TraesCS1A01G001900.2	chr1A	2.1021791188812636e-10	5.394669685671552e-10	6.049904944236637e-10	5.026375594891311e-10	6.52565766686945e-10	4.823503498423224e-10	4.900607824907166e-10	9.351016085254444e-10	7.817715981453908e-10	6.814081118391401e-10	2.5897224545557723e-10	6.299497166818103e-10	1.9284558653800958e-10	4.798521521660349e-10	4.827698756189697e-10	3.94355767903661e-10	5.018614253647862e-10	4.874432656820402e-10	6.969831058533713e-10	4.1888412601581783e-10	2.853243511406639e-10	4.904009165000374e-10	6.245463986458402e-10	3.824919202882965e-10
TraesCS1A01G001900.3	chr1A	2.1021791188812636e-10	5.394669685671552e-10	6.049904944236637e-10	5.026375594891311e-10	6.52565766686945e-10	4.823503498423224e-10	4.900607824907166e-10	9.351016085254444e-10	7.817715981453908e-10	6.814081118391401e-10	2.5897224545557723e-10	6.299497166818103e-10	1.9284558653800958e-10	4.798521521660349e-10	4.827698756189697e-10	3.94355767903661e-10	5.018614253647862e-10	4.874432656820402e-10	6.969831058533713e-10	4.1888412601581783e-10	2.853243511406639e-10	4.904009165000374e-10	6.245463986458402e-10	3.824919202882965e-10
TraesCS1A01G001900.4	chr1A	2.1021791188812636e-10	5.394669685671552e-10	6.049904944236637e-10	5.026375594891311e-10	6.52565766686945e-10	4.823503498423224e-10	4.900607824907166e-10	9.351016085254444e-10	7.817715981453908e-10	6.814081118391401e-10	2.5897224545557723e-10	6.299497166818103e-10	1.9284558653800958e-10	4.798521521660349e-10	4.827698756189697e-10	3.94355767903661e-10	5.018614253647862e-10	4.874432656820402e-10	6.969831058533713e-10	4.1888412601581783e-10	2.853243511406639e-10	4.904009165000374e-10	6.245463986458402e-10	3.824919202882965e-10
TraesCS1A01G001900.5	chr1A	2.1021791188812636e-10	5.394669685671552e-10	6.049904944236637e-10	5.026375594891311e-10	6.52565766686945e-10	4.823503498423224e-10	4.900607824907166e-10	9.351016085254444e-10	7.817715981453908e-10	6.814081118391401e-10	2.5897224545557723e-10	6.299497166818103e-10	1.9284558653800958e-10	4.798521521660349e-10	4.827698756189697e-10	3.94355767903661e-10	5.018614253647862e-10	4.874432656820402e-10	6.969831058533713e-10	4.1888412601581783e-10	2.853243511406639e-10	4.904009165000374e-10	6.245463986458402e-10	3.824919202882965e-10
TraesCS1A01G001900.6	chr1A	2.1021791188812636e-10	5.394669685671552e-10	6.049904944236637e-10	5.026375594891311e-10	6.52565766686945e-10	4.823503498423224e-10	4.900607824907166e-10	9.351016085254444e-10	7.817715981453908e-10	6.814081118391401e-10	2.5897224545557723e-10	6.299497166818103e-10	1.9284558653800958e-10	4.798521521660349e-10	4.827698756189697e-10	3.94355767903661e-10	5.018614253647862e-10	4.874432656820402e-10	6.969831058533713e-10	4.1888412601581783e-10	2.853243511406639e-10	4.904009165000374e-10	6.245463986458402e-10	3.824919202882965e-10
TraesCS1A01G001900.7	chr1A	2.1021791188812636e-10	5.394669685671552e-10	6.049904944236637e-10	5.026375594891311e-10	6.52565766686945e-10	4.823503498423224e-10	4.900607824907166e-10	9.351016085254444e-10	7.817715981453908e-10	6.814081118391401e-10	2.5897224545557723e-10	6.299497166818103e-10	1.9284558653800958e-10	4.798521521660349e-10	4.827698756189697e-10	3.94355767903661e-10	5.018614253647862e-10	4.874432656820402e-10	6.969831058533713e-10	4.1888412601581783e-10	2.853243511406639e-10	4.904009165000374e-10	6.245463986458402e-10	3.824919202882965e-10
TraesCS1A01G001900.8	chr1A	2.1021791188812636e-10	5.394669685671552e-10	6.049904944236637e-10	5.026375594891311e-10	6.52565766686945e-10	4.823503498423224e-10	4.900607824907166e-10	9.351016085254444e-10	7.817715981453908e-10	6.814081118391401e-10	2.5897224545557723e-10	6.299497166818103e-10	1.9284558653800958e-10	4.798521521660349e-10	4.827698756189697e-10	3.94355767903661e-10	5.018614253647862e-10	4.874432656820402e-10	6.969831058533713e-10	4.1888412601581783e-10	2.853243511406639e-10	4.904009165000374e-10	6.245463986458402e-10	3.824919202882965e-10
TraesCS1A01G001900.9	chr1A	2.1021791188812636e-10	5.394669685671552e-10	6.049904944236637e-10	5.026375594891311e-10	6.52565766686945e-10	4.823503498423224e-10	4.900607824907166e-10	9.351016085254444e-10	7.817715981453908e-10	6.814081118391401e-10	2.5897224545557723e-10	6.299497166818103e-10	1.9284558653800958e-10	4.798521521660349e-10	4.827698756189697e-10	3.94355767903661e-10	5.018614253647862e-10	4.874432656820402e-10	6.969831058533713e-10	4.1888412601581783e-10	2.853243511406639e-10	4.904009165000374e-10	6.245463986458402e-10	3.824919202882965e-10
TraesCS1A01G001900.10	chr1A	2.1021791188812636e-10	5.394669685671552e-10	6.049904944236637e-10	5.026375594891311e-10	6.52565766686945e-10	4.823503498423224e-10	4.900607824907166e-10	9.351016085254444e-10	7.817715981453908e-10	6.814081118391401e-10	2.5897224545557723e-10	6.299497166818103e-10	1.9284558653800958e-10	4.798521521660349e-10	4.827698756189697e-10	3.94355767903661e-10	5.018614253647862e-10	4.874432656820402e-10	6.969831058533713e-10	4.1888412601581783e-10	2.853243511406639e-10	4.904009165000374e-10	6.245463986458402e-10	3.824919202882965e-10
TraesCS1A01G002000.1	chr1A	0.3423915182875766	0.8786545008210476	4.926878303832062e-10	4.093343795256223e-10	5.314318402268916e-10	3.928130268803427e-10	3.9909219385547353e-10	7.6152135767214e-10	6.366535608338624e-10	5.549202629164677e-10	0.8435998578551084	5.130139432325217e-10	1.5704820903161692e-10	3.90778562530335e-10	0.39315467767394385	3.2115262880725085e-10	4.087023169703681e-10	3.9696055924411176e-10	5.676041151089109e-10	0.3411278579371439	2.3236040370007394e-10	3.99369189756461e-10	5.086136277489725e-10	0.31149103377883613
TraesCS1A01G002100.1	chr1A	0.6915156009953529	0.5070246553322372	0.8529116185131045	0.47241008292667835	1.8399658483515955	0.9066857993794012	0.6908844668082552	0.8788667302884433	1.1021364554115234	0.9606446727569398	1.2169912255143198	1.4801649428590316	0.0906241464193506	0.22549746913167856	0.45373719625620484	0.37064011135047475	0.23584031198721878	2.29064769534743e-10	0.9826021968427763	0.39369338994270026	1.340827976056586e-10	0.2304546619858662	0.880481403617767	1.0784691850660724
TraesCS1A01G002200.1	chr1A	15.123378211932897	22.639182867159217	24.48218488432642	106.97471557768806	49.88067493717912	94.70474772737798	34.52118260803687	42.045344654134155	80.84754508433919	20.425615535018345	15.137553375678051	23.6038992192194	22.833613911660414	28.048517527695196	31.836894423923983	73.29050943972513	64.68746393798605	69.40416571395986	47.0080919060747	58.38680480418838	77.4025504669426	42.630175913450294	40.25047612606008	24.65066156710836
TraesCS1A01G002300.1	chr1A	0.2575106533921082	0.660830898335236	7.410952566314603e-10	6.157159733510657e-10	1.5987470845613263	0.5908647490415119	6.003097977778184e-10	1.1454714957246269e-09	0.957646821023261	8.347045518380532e-10	1.2689330131518206	7.716695572117428e-10	0.23623007453149428	0.587804531621667	5.913786549764085e-10	1.4492220546100898	0.6147652328825188	5.971034179934365e-10	8.537834535603123e-10	5.131205229336164e-10	3.4951379431710364e-10	6.007264517637074e-10	7.650506542646091e-10	1.4056234793740359
TraesCS1A01G002400.1	chr1A	1.515444148846094e-09	3.888974320351487e-09	4.361328188673875e-09	3.6234740497444166e-09	4.7042945293324125e-09	3.4772251745675406e-09	3.5328090681431703e-09	6.741072863337182e-09	5.635729056113838e-09	4.9122166935633784e-09	1.866910248342905e-09	4.541257229882251e-09	1.3902084419207214e-09	3.4592158669058527e-09	3.4802495024081123e-09	2.8428792564134814e-09	3.617878960786991e-09	3.513939598379214e-09	5.024495582337331e-09	3.0197022323816346e-09	2.0568804750069923e-09	3.5352610670695175e-09	4.502305141411678e-09	2.7573537258341746e-09
TraesCS1A01G002500.1	chr1A	0.12564795797080872	0.32244123435703315	3.6160486733652605e-10	0.3004281718051229	3.9004076868345814e-10	0.2883024378838206	0.2929109895939991	5.589133981669209e-10	4.672675317058184e-10	4.072799360564421e-10	1.5478858812652348e-10	3.765230790054183e-10	1.1526446015146503e-10	0.5736185130551601	2.885531895729576e-10	0.23570777821004468	2.9996427351017093e-10	2.913464906402385e-10	0.4165891631405485	2.5036846068403587e-10	0.34107866204402276	2.9311428855033363e-10	3.7329349751681103e-10	0.2286167163059539
TraesCS1A01G002600.1	chr1A	0.49507607954848587	6.352389035543457e-10	2.8495794614103565	0.5918711452203685	0.7684162083971002	5.67982332962336e-10	0.5770616044992206	1.1011108292382425	9.205600375400672e-10	0.8023789545822867	2.4395821039677625	0.7417851157455578	0.6812447811989688	1.1300812576983945	0.5684763380017034	0.4643660139736233	0.5909572234802433	0.5739793981619952	8.207189869922174e-10	4.932489075899449e-10	0.3359781760848197	5.774621221516926e-10	0.7354225430058885	4.503959690204595e-10
TraesCS1A01G002600.2	chr1A	1.763877615870044e-10	4.5265110941796006e-10	5.076300022882707e-10	4.21748618904678e-10	5.475490353813136e-10	4.047262088431072e-10	4.111958095707625e-10	7.846166775359671e-10	6.559619065312828e-10	5.717498118737704e-10	2.1729611087269882e-10	5.285725628223605e-10	1.6181114651864135e-10	4.0263004352510753e-10	4.050782207720918e-10	3.3089250361533964e-10	4.210973872391416e-10	4.0899952702446596e-10	5.8481833827205e-10	3.5147353852310834e-10	2.3940739954999426e-10	4.114812061671078e-10	5.240387951479167e-10	3.2093789267905974e-10
TraesCS1A01G002600.3	chr1A	1.7519110106063394e-10	4.4958020636899146e-10	5.041861081072105e-10	4.1888736640193257e-10	5.438343200802192e-10	4.0198044080482284e-10	4.0840615007570983e-10	7.792936335906757e-10	6.515116900690624e-10	5.678709122002712e-10	2.158219174475109e-10	5.249865888547732e-10	1.6071337754633034e-10	3.9989849641842424e-10	4.023300645931767e-10	3.2864764266815283e-10	4.1824055286167115e-10	4.062247676823732e-10	5.808507783109099e-10	3.490890504734264e-10	2.3778319738208386e-10	4.0868961046719526e-10	5.204835794413501e-10	3.1876056640579606e-10
TraesCS1A01G002700.1	chr1A	4.717175837069782	5.908561715458922	6.7878291539327495	7.385003217384766	5.578370130990212	7.602346689201623	3.011000630756068	3.4971954209998826	3.550273993282641	5.096809387866787	4.012492903344798	7.909277336346295	4.636446734849747	6.2811127354963805	5.932408598701458	4.003177575159403	3.753832658821193	4.817911965131358	2.420464208170196	3.021278277499996	3.8872464510158444	5.240157322927157	7.174080165474696	6.130650768397367
TraesCS1A01G002800.1	chr1A	5.131790201974849e-10	1.3169340703257022e-09	1.4768885599165905e-09	1.227026983458761e-09	1.5930281951475419e-09	1.1775023246150813e-09	1.1963248513743963e-09	2.282748044341526e-09	1.908442430766689e-09	1.6634374494896658e-09	6.321969521415561e-10	1.5378184260173603e-09	4.707701083133762e-10	1.17140378322885e-09	1.1785264610698378e-09	9.626920216471724e-10	1.2251323030963897e-09	1.1899350309296862e-09	1.701458758406759e-09	1.0225700723327316e-09	6.965270924904442e-10	1.1971551785147969e-09	1.5246279731648451e-09	9.337302759979003e-10
TraesCS1A01G002900.1	chr1A	2.0462098491551062e-10	5.251039811314527e-10	5.888829820523204e-10	4.892551331826059e-10	6.351915909653273e-10	4.695080584360609e-10	4.770132053974614e-10	9.102050839244499e-10	7.609573939475419e-10	6.632660258187003e-10	2.520772633261736e-10	6.131776798509791e-10	1.8771118740355858e-10	4.670763737882388e-10	4.699164145882269e-10	3.838562799467965e-10	4.884996631680691e-10	4.744653784182394e-10	6.784263448734398e-10	4.07731585101292e-10	2.777277598583134e-10	4.773442835409238e-10	6.079182219465531e-10	3.7230830022356847e-10
TraesCS1A01G002900.2	chr1A	6.581498699239842e-11	1.6889622392392024e-10	1.8941031790958007e-10	1.5736567898777873e-10	2.0430517580748374e-10	1.5101416294890126e-10	1.5342814385044254e-10	2.9276144762785603e-10	2.4475691486435877e-10	2.1333513217025178e-10	8.107898519666405e-11	1.9722454683758173e-10	6.037606241800667e-11	1.5023202765846603e-10	1.5114550800549047e-10	1.2346483466532193e-10	1.571226870522233e-10	1.526086521469615e-10	2.1821134856516497e-10	1.311441687220488e-10	8.932929782373116e-11	1.5353463294643844e-10	0.19553287716988044	1.1975050333421944e-10
TraesCS1A01G003000.1	chr1A	4.5785759390669227e-10	1.1749667107279693	1.317677878280192e-09	1.0947517341781005e-09	1.4212974960961758e-09	1.0505659038055124e-09	1.0673593354815537e-09	2.036664567221021e-09	1.7027096297195002e-09	1.4841165329489358e-09	5.640452239674309e-10	1.3720394183899569e-09	4.2002042287817543e-10	1.04512479383113e-09	1.0514796368977704e-09	8.589124561930092e-10	1.0930613030462824e-09	1.0616583467443583e-09	1.5180390908338317e-09	9.123355680812598e-10	6.214404839382828e-10	1.06810015217845e-09	1.360270915064805e-09	1.6661456564435102
TraesCS1A01G003100.1	chr1A	1.4655600622211941e-10	3.7609604096929253e-10	4.2177657397844974e-10	3.504199648561002e-10	4.549442609524649e-10	3.362764868026725e-10	3.4165190988172324e-10	6.51917602674606e-10	5.450216975946641e-10	4.750520570846764e-10	1.8054569030512547e-10	4.391772031622791e-10	1.3444467565453517e-10	3.34534837525969e-10	3.3656896436455303e-10	2.7492998030241616e-10	3.4987887339279416e-10	3.39827075802394e-10	4.85910355976323e-10	2.920302272405395e-10	1.989173853241723e-10	3.418890384952587e-10	4.3541021344866637e-10	2.6665895282755016e-10
TraesCS1A01G003200.1	chr1A	4.772523156712029e-11	1.2247379762473083e-10	1.3734943508354187e-10	1.1411251165750879e-10	1.4815032671661181e-10	1.0950675865792654e-10	1.112572383402817e-10	2.1229371181944554e-10	1.7748359413798294e-10	1.5469833011443777e-10	0.05879380251270654	1.4301586308345082e-10	4.378123724833499e-11	1.0893959926827038e-10	1.0960200251540299e-10	8.952957516316575e-11	1.1393630792454042e-10	1.1066299023505177e-10	1.5823428092523863e-10	9.509818518478424e-11	6.4776453193833e-11	1.1133445808912653e-10	1.4178916169449067e-10	8.683615636914014e-11
TraesCS1A01G003300.1	chr1A	2.7452764390561154e-11	7.045003659082044e-11	7.900688077798396e-11	6.564041270586501e-11	8.521982775538391e-11	6.299106669356065e-11	6.399798703133997e-11	1.221167307272342e-10	1.0209306760947844e-10	8.898640548809319e-11	3.3819687267991054e-11	8.226635396878037e-11	2.518407876587121e-11	6.266482221899529e-11	6.304585337752406e-11	5.149968375710763e-11	6.553905584688119e-11	6.365616044010653e-11	9.10203741314723e-11	5.4702889564321164e-11	3.726105980408993e-11	6.404240579059425e-11	8.156072419805133e-11	4.995036091194754e-11
TraesCS1A01G003400.1	chr1A	4.0885320291857886e-10	1.0492102979542327e-09	1.1766471237334206e-09	9.775807125972904e-10	1.2691763581352804e-09	9.381240812956126e-10	9.531201159144969e-10	1.8186808358338442e-09	1.5204690170389455e-09	1.325271888193793e-09	5.036755958163887e-10	1.2251903609435332e-09	3.750657354390293e-10	9.332653320467975e-10	9.389400177491172e-10	7.669832572717815e-10	9.760712079133996e-10	9.480293026659564e-10	1.35556372265719e-09	8.146885060130313e-10	5.549278545617345e-10	9.537816431739167e-10	1.2146814377716118e-09	7.439092382554518e-10
TraesCS1A01G003500.1	chr1A	6.107655699228345e-10	1.5673633495456325e-09	1.7577349180464249e-09	1.4603594561883838e-09	1.8959597630043596e-09	1.4014171469874856e-09	1.4238189811059516e-09	2.716837312943841e-09	2.271353432265369e-09	1.9797580997710497e-09	7.52416050893167e-10	1.8302512582117685e-09	5.602921440475188e-10	1.394158901893939e-09	1.4026360340831183e-09	1.1457583379679688e-09	1.4581044818308971e-09	1.4162140670856627e-09	2.0250095724462657e-09	1.217022848623062e-09	8.289792642885325e-10	1.4248072039466552e-09	1.8145524978631744e-09	1.1112892026540762e-09
TraesCS1A01G003600.1	chr1A	8.458847057238418e-11	2.1707325215798395e-10	2.4343891619170217e-10	2.022536615816459e-10	2.6258247765927777e-10	1.940903988948863e-10	1.9719295899226816e-10	3.76270576491305e-10	3.145729268742787e-10	2.7418819594575466e-10	1.0420646826442317e-10	2.534821252528615e-10	7.759811271727297e-11	1.9308516238232357e-10	1.942592096469937e-10	1.5868272579037514e-10	2.0194135708795314e-10	1.9613971028689013e-10	2.8045533517763407e-10	1.6855256171312585e-10	1.1481015229991863e-10	1.9732982371221364e-10	2.5130791276747577e-10	1.5390889507407736e-10
TraesCS1A01G003700.1	chr1A	1.0118796354364202e-09	2.5967132609243473e-09	2.9121094175157852e-09	2.419435650769783e-09	3.1411120211529905e-09	2.321783580510615e-09	2.358897590954531e-09	4.501092538842696e-09	3.763041658157516e-09	3.279944061846394e-09	1.2465576266364854e-09	3.0322501252818798e-09	9.282583013451839e-10	2.3097585568995197e-09	2.3238029592881757e-09	1.898223453341917e-09	2.415699744976894e-09	2.346298227130949e-09	3.354913978175083e-09	2.0162902053206527e-09	1.3734029503965187e-09	2.3605348190777655e-09	3.0062413640146946e-09	1.8411170645852016e-09
TraesCS1A01G003800.1	chr1A	4.511385097193823e-10	1.1577240115092478e-09	1.2983408863557449e-09	1.0786861951021113e-09	1.4004398808494815e-09	1.0351487941060603e-09	1.051695781292097e-09	2.0067764079536266e-09	1.67772227666282e-09	1.462337045044025e-09	5.557678307435903e-10	1.3519046680152616e-09	4.138566011587892e-10	1.0297875327057255e-09	1.0360491181172999e-09	8.463078708820007e-10	1.0770205711357501e-09	1.0460784548634139e-09	1.4957617876140483e-09	8.98946995803338e-10	6.123208122662326e-10	1.0524257264651395e-09	1.3403088680932042e-09	8.208474403950793e-10
TraesCS1A01G003900.1	chr1A	3.231127164206387e-10	8.291807109458127e-10	9.298927969845199e-10	7.725725451407014e-10	1.0030177525003042e-09	7.413903525354216e-10	7.53241573087583e-10	1.4372858056965164e-09	1.2016119008531007e-09	1.0473495052342338e-09	3.9804993282986866e-10	9.682560460109305e-10	2.9641080893805173e-10	7.375505301811278e-10	7.420351791921202e-10	6.061394210371086e-10	7.71379598245875e-10	7.492183528075803e-10	1.0712888478857373e-09	6.438404159132014e-10	4.385540952717612e-10	7.537643716574647e-10	9.599509460667542e-10	5.879042478505297e-10
TraesCS1A01G004000.1	chr1A	2.5346651252785084e-10	6.504527131801074e-10	7.294565403906835e-10	6.060463074955325e-10	7.868195796998853e-10	5.815853648864438e-10	5.908820820687046e-10	1.1274821514651116e-09	9.42607215510206e-10	8.215957249540634e-10	3.122511840573528e-10	7.595506792029208e-10	2.32520139873666e-10	5.78573207421238e-10	0.5820912012204328	4.754874610255764e-10	6.05110497563902e-10	0.5877260582671706	8.40374997281391e-10	5.050620930485184e-10	3.4402476731565717e-10	5.912921926076225e-10	7.530357244763938e-10	0.46118283799764076
TraesCS1A01G004100.1	chr1A	1.195295699700863e-10	3.067400593352589e-10	3.4399663180430863e-10	0.28579891626267756	3.710478558592127e-10	2.74263640874981e-10	2.7864778060155356e-10	5.31697285647406e-10	4.4451408589233385e-10	3.874475673871504e-10	1.4725120640512452e-10	3.5818840583777805e-10	1.0965169343792396e-10	2.728431696541183e-10	2.745021825635727e-10	2.242300616982305e-10	2.853576073496127e-10	2.7715946471200616e-10	3.9630348418361464e-10	2.381768470643541e-10	1.6223497173726696e-10	2.788411802576586e-10	3.551160878062165e-10	2.1748429683491176e-10
TraesCS1A01G004200.1	chr1A	13.79442751010671	7.079927612384979	15.879707767859422	16.49145240918634	8.564228506400095	3.165166508220236	3.2157621037050585	6.136104785858205e-09	5.129958499795929e-09	8.942753472240604	20.39240425282956	20.668542524751647	18.98169218902914	3.1487734204605116	3.1679194220265865	2.587749066735348e-09	6.586395034469514	3.198586047877102	4.573579316701149	5.497406630930653	3.744577276885019	12.871976196137775	12.294756351799373	25.09898904535944
TraesCS1A01G004300.1	chr1A	3.366951118224868e-11	8.640362263845487e-11	9.689818547903781e-11	8.050484745963919e-11	1.0451806975569041e-10	7.725555045195434e-11	7.849049040518362e-11	1.4977036819555855e-10	1.2521229675104283e-10	1.0913759838625219e-10	4.1478239584545617e-11	1.0089577448262434e-10	3.0887076053939053e-11	7.685542710451097e-11	7.73227437167965e-11	6.316191526192464e-11	8.038053808778859e-11	7.807125633198839e-11	1.1163216428891744e-10	6.709049499293712e-11	4.569891949269734e-11	7.854496790297353e-11	1.0003035309488763e-10	6.126174440415973e-11
TraesCS1A01G004400.1	chr1A	1.2557463672601363e-10	3.2225307536855347e-10	3.613938549650012e-10	3.0025285843048465e-10	3.898131627106804e-10	2.8813420042127457e-10	2.9274006283388265e-10	5.585872475747209e-10	4.669948605143931e-10	4.0704227026998633e-10	1.5469826216574162e-10	3.7630336120012436e-10	1.151971982606939e-10	2.8664189054695457e-10	2.883848060738876e-10	2.3557023210117543e-10	2.9978923114087887e-10	2.9117647712692965e-10	4.1634606459360106e-10	2.502223596565992e-10	1.7043981372359053e-10	2.929432434490594e-10	3.7307566431460325e-10	2.2848330815120765e-10
TraesCS1A01G004500.1	chr1A	1.3605462748333743e-10	3.4914711495674047e-10	3.9155443801371357e-10	3.2531084197916156e-10	4.223455151729416e-10	3.1218080597803423e-10	3.171710564866155e-10	6.052048555914941e-10	5.059685095689136e-10	4.410124997804003e-10	1.676088020640838e-10	4.077082360231484e-10	1.2481112671406265e-10	3.10563953488281e-10	3.1245232624359456e-10	2.5523004493828095e-10	3.2480852208540743e-10	3.1547697974911387e-10	4.510927540728562e-10	2.7110498440349344e-10	1.8466408479514834e-10	3.17391193798022e-10	4.0421116759565333e-10	2.475516727513927e-10
TraesCS1A01G004600.1	chr1A	9.263584551706644e-11	2.3772464635811936e-10	2.665986236727035e-10	2.214951851328916e-10	2.875634193565229e-10	2.1255530554825258e-10	2.1595302956363766e-10	4.1206730374252256e-10	3.4450001117871934e-10	3.002732546216099e-10	1.1412021320047033e-10	2.775972994590098e-10	8.49804557695835e-11	2.11454435256406e-10	2.1274017621263542e-10	1.7377910220004922e-10	2.2115316936364733e-10	2.1479957941018014e-10	3.0713662190783514e-10	1.8458791089031088e-10	1.2573268508437062e-10	2.1610291499090465e-10	2.7521624196317624e-10	1.6855111023179202e-10
TraesCS1A01G004700.1	chr1A	2.087226664754077e-10	5.35629828797198e-10	6.006872965971778e-10	4.990623812451088e-10	6.479241737780821e-10	4.789194711819503e-10	4.865750607917848e-10	9.284503846691366e-10	7.762109854201406e-10	6.765613680756546e-10	2.5713021849145735e-10	6.254689880148203e-10	1.9147390761662698e-10	4.76439042774618e-10	4.793360129407876e-10	3.9155078022377724e-10	4.982917676350657e-10	4.839761619494165e-10	6.920255797205635e-10	4.159046721611951e-10	2.8329488598544416e-10	4.869127754838715e-10	6.201041028908422e-10	3.7977131820412493e-10
TraesCS1A01G004800.1	chr1A	1.8439851682617424e-10	4.732085291258879e-10	5.306843211582607e-10	4.4090258360214835e-10	5.7241630091277e-10	4.2310709065003493e-10	4.298705121476694e-10	8.202505112201198e-10	6.857528071706641e-10	5.97716170082262e-10	2.2716474315740577e-10	5.525780005512251e-10	1.6915989610346394e-10	4.2091572673575927e-10	4.23475089410413e-10	3.459201837281185e-10	4.4022177586268445e-10	4.275744841215496e-10	6.113782113898037e-10	3.674359185931381e-10	2.5028022917822877e-10	4.30168870200404e-10	5.478383291177878e-10	3.3551347820775734e-10
TraesCS1A01G004900.1	chr1A	0.2163469195891472	5.551953955997766e-10	6.226292923508951e-10	5.172922068334857e-10	6.71591645273327e-10	4.964135135274035e-10	5.043487476638708e-10	9.623649597123456e-10	8.045645368312651e-10	0.701274904004894	0.5330454196995507	6.483162131132168e-10	1.9846809526080002e-10	4.938424796588115e-10	4.968452707861448e-10	4.0585340590889507e-10	5.164934441337997e-10	5.016549158544053e-10	7.17303993993198e-10	4.3109690046735134e-10	2.9364312411292856e-10	5.046987984489324e-10	6.427553586599782e-10	3.936436619320906e-10
TraesCS1A01G005000.1	chr1A	4.0833599456574073e-10	1.0478830237000214e-09	1.1751586390734161e-09	9.76344051354283e-10	1.267570821945356e-09	9.369373335646883e-10	9.519143978677993e-10	1.8163801643147629e-09	1.5185455900724193e-09	1.3235953899165083e-09	5.030384350373674e-10	1.2236404680138136e-09	3.74591268980536e-10	9.320847307412354e-10	9.377522378405162e-10	7.660130064719438e-10	9.748364562272349e-10	9.468300246107182e-10	1.3538489045387116e-09	8.136579070174424e-10	5.542258585407836e-10	9.525750882805912e-10	1.2131448388623498e-09	7.429681766004798e-10
TraesCS1A01G005100.1	chr1A	0.2909324957431344	7.465989456826199e-10	8.372806707413568e-10	6.956286368594509e-10	9.03122789317534e-10	6.675520163883606e-10	6.782229215993648e-10	1.294140171149905e-09	1.0819380702588982e-09	1.8860786953621465	1.0752191519502194	8.718231545425143e-10	2.66889948741878e-10	6.640946188832327e-10	6.681326219134096e-10	5.457713218711775e-10	6.945545008090392e-10	6.746003915770821e-10	9.645944651084736e-10	0.5797175089143621	3.9487655806803915e-10	6.786936523531386e-10	8.643451961430262e-10	0.5293522705633128
TraesCS1A01G005200.1	chr1A	0.18982040813114243	4.871223347455846e-10	5.462880942002561e-10	4.5386649373452554e-10	4.713976994404261	0.4355477582614144	4.425100449952927e-10	8.443684327496736e-10	7.059160770080843e-10	7.38349066144916	4.443037797966121	4.550604128601379	0.5224011729982095	4.332919609826208e-10	4.359265768967527e-10	3.560913152696686e-10	0.4531656685787929	4.4014650658910476e-10	2.5174185458521747	0.7564793599751679	0.2576392482297001	0.44281717614749655	0.5639464840221574	1.0361358608617195
TraesCS1A01G005300.1	chr1A	4.418748852898262e-10	1.1339514445378053e-09	1.2716809092231835e-09	1.0565365812396451e-09	1.3716834151236194e-09	1.0138931720504945e-09	1.0301003853723414e-09	1.9655695001927717e-09	1.643272127244692e-09	1.432309590320328e-09	5.443557602971099e-10	1.324144818569363e-09	4.0535851899947114e-10	1.0086419981532467e-09	1.0147750089157126e-09	8.289298858536229e-10	1.0549051589974389e-09	1.024598404455541e-09	1.4650479932071889e-09	8.804881252529613e-10	5.997474896324291e-10	1.0308153419381345e-09	1.3127871254218858e-09	8.039922568140715e-10
TraesCS1A01G005400.1	chr1A	0.5043587562921995	1.2942992672862788	1.4515045377930242e-09	1.2059374571805637e-09	1.5656480230434435e-09	1.1572640034107595e-09	1.1757630179913988e-09	2.243513312329406e-09	1.875641076487887e-09	3.2696942382879715	3.7279864027810694	6.045548688792135	4.626787470767401e-10	1.1512702807046043e-09	1.1582705386784706	0.9461457534712575	1.2040753416369205e-09	1.1694830225855821e-09	1.6722149359966427e-09	1.0049946492145127e-09	6.845555330882648e-10	1.1765790750606528	1.4984234298760743e-09	0.9176817877968682
TraesCS1A01G005500.1	chr1A	4.657858639310505e-10	1.1953124534413663e-09	1.3404948112374249e-09	1.1137084741638683e-09	1.4459087081497894e-09	1.068757521187426e-09	1.085841748217165e-09	2.071931486133939e-09	1.7321937791518726e-09	1.5098155205324673e-09	5.738122408326679e-10	1.3957976767170559e-09	4.272935037938149e-10	1.063222192858509e-09	1.0696870764977316e-09	8.737853991573904e-10	1.1119887714973004e-09	1.0800420410602782e-09	1.5443254820171017e-09	9.281335865761736e-10	6.322013581190324e-10	1.0865953929088128e-09	1.383825389784542e-09	8.474983313169975e-10
TraesCS1A01G005600.1	chr1A	1.0362427085207642e-10	2.659234446981916e-10	2.982224411516968e-10	2.4776885155555725e-10	3.2167407215017786e-10	2.3776852718551726e-10	2.4156928780561646e-10	4.609465553421572e-10	3.8536445873266373e-10	3.358915427701444e-10	1.2765710526389688e-10	3.1052577526963716e-10	9.506080196761274e-11	2.3653707211908403e-10	2.3797532713095607e-10	1.9439270677883517e-10	2.4738626601850053e-10	2.4027901587633156e-10	3.43569039819535e-10	2.0648365184503635e-10	1.40647043716369e-10	2.4173695257971344e-10	3.0786227772734756e-10	1.8854457258512976e-10
TraesCS1A01G005600.2	chr1A	1.0362427085207642e-10	2.659234446981916e-10	2.982224411516968e-10	2.4776885155555725e-10	3.2167407215017786e-10	2.3776852718551726e-10	2.4156928780561646e-10	4.609465553421572e-10	3.8536445873266373e-10	3.358915427701444e-10	1.2765710526389688e-10	3.1052577526963716e-10	9.506080196761274e-11	2.3653707211908403e-10	2.3797532713095607e-10	1.9439270677883517e-10	2.4738626601850053e-10	2.4027901587633156e-10	3.43569039819535e-10	2.0648365184503635e-10	1.40647043716369e-10	2.4173695257971344e-10	3.0786227772734756e-10	1.8854457258512976e-10
TraesCS1A01G005600.3	chr1A	1.0362427085207642e-10	2.659234446981916e-10	2.982224411516968e-10	2.4776885155555725e-10	3.2167407215017786e-10	2.3776852718551726e-10	2.4156928780561646e-10	4.609465553421572e-10	3.8536445873266373e-10	3.358915427701444e-10	1.2765710526389688e-10	3.1052577526963716e-10	9.506080196761274e-11	2.3653707211908403e-10	2.3797532713095607e-10	1.9439270677883517e-10	2.4738626601850053e-10	2.4027901587633156e-10	3.43569039819535e-10	2.0648365184503635e-10	1.40647043716369e-10	2.4173695257971344e-10	3.0786227772734756e-10	1.8854457258512976e-10
TraesCS1A01G005600.4	chr1A	1.0362427085207642e-10	2.659234446981916e-10	2.982224411516968e-10	2.4776885155555725e-10	3.2167407215017786e-10	2.3776852718551726e-10	2.4156928780561646e-10	4.609465553421572e-10	3.8536445873266373e-10	3.358915427701444e-10	1.2765710526389688e-10	3.1052577526963716e-10	9.506080196761274e-11	2.3653707211908403e-10	2.3797532713095607e-10	1.9439270677883517e-10	2.4738626601850053e-10	2.4027901587633156e-10	3.43569039819535e-10	2.0648365184503635e-10	1.40647043716369e-10	2.4173695257971344e-10	3.0786227772734756e-10	1.8854457258512976e-10
TraesCS1A01G005600.5	chr1A	1.0362427085207642e-10	2.659234446981916e-10	2.982224411516968e-10	2.4776885155555725e-10	3.2167407215017786e-10	2.3776852718551726e-10	2.4156928780561646e-10	4.609465553421572e-10	3.8536445873266373e-10	3.358915427701444e-10	1.2765710526389688e-10	3.1052577526963716e-10	9.506080196761274e-11	2.3653707211908403e-10	2.3797532713095607e-10	1.9439270677883517e-10	2.4738626601850053e-10	2.4027901587633156e-10	3.43569039819535e-10	2.0648365184503635e-10	1.40647043716369e-10	2.4173695257971344e-10	3.0786227772734756e-10	1.8854457258512976e-10
TraesCS1A01G005600.6	chr1A	1.0362427085207642e-10	2.659234446981916e-10	2.982224411516968e-10	2.4776885155555725e-10	3.2167407215017786e-10	2.3776852718551726e-10	2.4156928780561646e-10	4.609465553421572e-10	3.8536445873266373e-10	3.358915427701444e-10	1.2765710526389688e-10	3.1052577526963716e-10	9.506080196761274e-11	2.3653707211908403e-10	2.3797532713095607e-10	1.9439270677883517e-10	2.4738626601850053e-10	2.4027901587633156e-10	3.43569039819535e-10	2.0648365184503635e-10	1.40647043716369e-10	2.4173695257971344e-10	3.0786227772734756e-10	1.8854457258512976e-10
TraesCS1A01G005700.1	chr1A	0.11889119853665107	0.30510185306195886	3.421594490561825e-10	2.842725497589542e-10	3.6906620064375835e-10	0.8183966435688057	2.771596064510111e-10	5.288576500518673e-10	4.4214006959567126e-10	0.3853783266207374	0.5858591278032439	3.562754290846849e-10	0.21813215342701353	0.27138599645958	0.2730361490807445	2.2303251624901343e-10	0.8515007943696117	0.2756792394855403	3.941869462386193e-10	0.9476192643213074	0.1613685236149558	0.27735197349496055	3.532195193814687e-10	1.0816138926706123
TraesCS1A01G005800.1	chr1A	1.4484613134584612e-10	3.7170811318593975e-10	4.168556895613801e-10	3.4633160089547267e-10	4.4963640778452054e-10	3.3235313537486476e-10	3.376658431745548e-10	6.443116535296477e-10	5.386629073153455e-10	4.695096054426744e-10	1.7843925640432525e-10	4.340533048978773e-10	1.3287610416383833e-10	3.3063180599100146e-10	3.3264220058915327e-10	2.717223610572455e-10	3.4579682236824284e-10	3.358622995085361e-10	4.802412201201936e-10	2.88623098719896e-10	1.9659660811150524e-10	3.379002051989263e-10	4.3033026480623185e-10	2.6354783199581744e-10
TraesCS1A01G005800.2	chr1A	1.1691039612612026e-10	3.000186636127732e-10	3.3645885700381584e-10	2.7953638992957653e-10	3.629173251531344e-10	0.26825388008820544	2.725419527397665e-10	5.200465483125027e-10	4.3477373739668513e-10	0.3789576808313299	1.4402458634445448e-10	0.3503396562594015	1.0724896708769058e-10	0.26686453472935884	2.684871944994307e-10	2.1931665397177527e-10	0.27910475169077775	0.2710862496208772	3.8761954329512915e-10	0.23295783272020457	1.5868002215736668e-10	0.2727311148275327	0.3473346599346898	2.127187046731906e-10
TraesCS1A01G005900.1	chr1A	4.131359023713663	8.370005358269689	6.88352438328855	7.2786794322058945	6.074861982978949	6.485979460503987	8.110349144482596	7.737816207856118	9.703552353403422	7.048178887393937	2.6786923741111757	5.212733122725931	3.5904743459886563	7.941399579085187	3.495488049061495	5.710654054045493	4.152823004346003	7.562840698935708	9.372063501894432	8.665497817843693	8.853800091433342	6.086983690254427	7.7520322953231675	3.9563243089350677
TraesCS1A01G006000.1	chr1A	1.824185384030619e-10	0.46812745468393235	5.249861001342388e-10	4.3616839366801964e-10	5.662699829035343e-10	4.1856397975862456e-10	4.252547790418171e-10	8.114430742530771e-10	6.783895388257968e-10	5.912981948171798e-10	0.22472556275484074	5.466446962220512e-10	1.673435423165378e-10	4.163961456066384e-10	4.1892802713361293e-10	3.422058669771526e-10	4.354948960992535e-10	4.22983404608518e-10	6.048135400044371e-10	3.634905767150541e-10	0.24759284634902792	0.42554993390156415	5.419559169938895e-10	3.3191090342055905e-10
TraesCS1A01G006100.1	chr1A	2.1320317285615457e-10	5.471278271036108e-10	6.135818389613841e-10	5.097754112256016e-10	6.618327177990779e-10	4.892001071221177e-10	4.970200340254263e-10	9.483807925302642e-10	7.928733744730829e-10	6.910846471129456e-10	2.626498566030639e-10	6.388955019583353e-10	1.9558414671671973e-10	4.866664330587495e-10	4.896255904973105e-10	3.9995593237521237e-10	5.089882553815252e-10	4.943653464034165e-10	7.068808183869561e-10	4.248326126137967e-10	2.893761830756205e-10	4.973649982072702e-10	6.334154525235718e-10	3.879236087203958e-10
TraesCS1A01G006200.1	chr1A	0.18658358614277898	0.4788159139093748	0.5369727775239875	0.89225430402481	0.5791992692195483	0.4281207878170723	4.34964353476587e-10	0.8299702435414268	0.6938787804350623	6.047989339473987e-10	2.29856579709271e-10	0.5591258907122586	0.17116439215331103	0.8518069133171712	4.2849314682828214e-10	1.0500577141351144	0.8908765537952985	0.43264111861459065	6.18622866495868e-10	0.37178992840490455	1.266229888046568	4.3526624698601573e-10	5.543300549830564e-10	3.3948921595530593e-10
TraesCS1A01G006300.1	chr1A	1.8556458965462374e-10	4.762009371858963e-10	5.340401863682296e-10	4.4369069996870405e-10	5.760360648162138e-10	4.2578267443684166e-10	0.43258886591950774	8.254374934698591e-10	6.900892721772046e-10	6.014959216608219e-10	0.22860125512773252	0.5560723144192052	1.7022960513314955e-10	4.235774530905126e-10	4.261530002948709e-10	3.481076640506303e-10	4.4300558703514176e-10	0.4302783185991617	6.152443570208976e-10	3.697594570263226e-10	2.5186291530697867e-10	4.328891102534103e-10	5.513026703769403e-10	3.376351501021438e-10
TraesCS1A01G006400.1	chr1A	4.427840928727271e-10	1.1362846779627802e-09	1.2742975366084162e-09	1.0587105248224427e-09	1.3745058089818984e-09	1.0159793719929851e-09	1.0322199334903915e-09	1.9696138818804116e-09	1.6466533456135085e-09	1.4352567293950615e-09	5.454758338779682e-10	1.3268693963853494e-09	4.0619259002621907e-10	1.010717393211175e-09	1.0168630233373499e-09	8.306355029027044e-10	1.0570757457443472e-09	1.0267066316252026e-09	1.468062495250825e-09	8.822998292143872e-10	6.009815379650061e-10	1.0329363611602294e-09	1.3154883334988857e-09	8.056465618692445e-10
TraesCS1A01G006500.1	chr1A	1.8482084380430464e-10	4.742923161951713e-10	5.318997447394993e-10	4.4191238052995175e-10	5.737273030333833e-10	0.4240761310755998	4.3085504237875485e-10	8.22129126762565e-10	6.87323383310763e-10	5.990851163635842e-10	2.2768501740454558e-10	5.538435671141824e-10	1.6954732214664397e-10	4.2187974786770495e-10	4.244449722375769e-10	3.467124429522311e-10	4.4123001354001097e-10	4.2855375577141293e-10	6.127784477743209e-10	0.36827745556283126	2.508534447045459e-10	4.311540837594087e-10	5.490930404355497e-10	3.362819030075461e-10
TraesCS1A01G006600.1	chr1A	4.969816839171949e-10	1.2753680219166542e-09	1.4302739094496312e-09	1.1882986491078689e-09	1.5427478595039322e-09	1.1403371242230734e-09	1.1585655604534186e-09	2.2106982600320552e-09	1.8482067574322517e-09	1.6109348048175516e-09	6.122430837521768e-10	1.4892806619937175e-09	4.5591131351672624e-10	1.134431069516469e-09	1.1413289361246006e-09	9.323068231194327e-10	1.1864637700502373e-09	1.1523774202536915e-09	1.6477560570251755e-09	0.9902949594156809	6.745427885704226e-10	1.1593696801936987e-09	1.476506535982583e-09	0.9042591904387922
TraesCS1A01G006700.1	chr1A	1.7858345986402102e-10	4.5828577053104665e-10	5.139490479599089e-10	4.2699860171262e-10	5.543649984773466e-10	4.0976429443036574e-10	4.1631442960691304e-10	7.943836901194023e-10	6.641274074424605e-10	5.788670294489625e-10	2.2000104171343776e-10	5.351523042682819e-10	1.6382539315580287e-10	4.0764203576815855e-10	4.101206882505826e-10	3.3501149743627743e-10	4.263392634288404e-10	4.140908074438576e-10	5.920982345990879e-10	3.5584872779932956e-10	2.4238757464812696e-10	4.1660337885798457e-10	5.305620996518327e-10	3.249329701812886e-10
TraesCS1A01G006800.1	chr1A	1.7774757913227865e-10	4.561407104817548e-10	0.5115434499540189	4.2499998490944974e-10	1.1035404573224792	0.40784634522221097	4.143658213185547e-10	7.906654845213765e-10	6.610188815816341e-10	1.1523151500574347	0.8758852048379995	0.5326474619670746	0.32611717871935114	4.0573401963157854e-10	4.082010704917004e-10	3.3344343701325523e-10	0.42434373315982227	4.1215260707861926e-10	5.893268496904468e-10	3.54183136287053e-10	0.4825061028585321	4.1465341810892465e-10	0.5280787423346247	3.234120834816515e-10
TraesCS1A01G006900.1	chr1A	1.3215541608389576	1.69570425926109	1.901664083218049	7.899692657068175e-10	1.0256036189865083	0.7580849159913359	7.702030005266073e-10	1.4696504809527326e-09	1.2286696918651458e-09	1.0709336302715475	0.4070131865861727	9.900591504246873e-10	3.030853614422862e-10	7.541586280971819e-10	7.587442620398444e-10	1.2395768309495152	0.7887494569275715	7.660891857264818e-10	1.0954120369581053	0.6583383583833008	4.484294177855573e-10	7.707375714286665e-10	9.815670369710211e-10	6.011426239536122e-10
TraesCS1A01G007000.1	chr1A	3.914973968516895e-10	1.004671352619608e-09	1.126698489008533e-09	9.36082440989158e-10	1.2152998602156507e-09	8.983007424898557e-10	9.126601958938694e-10	1.741477889497659e-09	1.455925153368402e-09	1.2690141367240748e-09	4.822945820461356e-10	1.1731810672709757e-09	3.591442063421633e-10	8.936482469993289e-10	8.990820424656495e-10	7.344248412566058e-10	9.346370147333282e-10	9.077854875133689e-10	1.2980200837329914e-09	7.801050036352798e-10	5.313711839617822e-10	9.132936413411852e-10	1.163118247569057e-09	7.123303136478825e-10
TraesCS1A01G007100.1	chr1A	3.3311620609310427e-10	8.548519403868594e-10	9.586820476651552e-10	0.7964912005855116	1.0340709336922641e-09	1.528687229211993	7.765617456289941e-10	1.48178381825678e-09	1.2388135076906578e-09	1.0797751865108358e-09	4.103734601620628e-10	9.982330133796901e-10	3.0558761416833193e-10	7.603849119204816e-10	7.650084045541054e-10	0.6249053480099122	7.952613195537967e-10	0.7724139682179999	1.1044556852815806e-09	6.637735557247557e-10	0.4521316218932972	0.7771007306902146	9.896707895982328e-10	6.06105617753023e-10
TraesCS1A01G007200.1	chr1A	1.039580044135968e-09	2.667798809130006e-09	2.9918289989936733e-09	2.485668188713561e-09	3.227100595000979e-09	2.3853428733748346e-09	2.4234728873252668e-09	4.624310853110531e-09	3.866055681005629e-09	3.3697331907536224e-09	1.2806823925830558e-09	3.115258582817777e-09	9.536695591919926e-10	2.3729886623218897e-09	2.3874175330529085e-09	1.950187702467219e-09	2.481830011747598e-09	2.4105286133809103e-09	3.446755423632372e-09	2.071486555546822e-09	1.4110001326134926e-09	2.42515493489793e-09	3.088537826475644e-09	1.8915180148234437e-09
TraesCS1A01G007300.1	chr1A	4.719146252985644e-10	1.2110402488813843e-09	1.35813290085897e-09	1.1283625330344456e-09	1.4649338227307075e-09	1.0828201201504184e-09	1.100129139641075e-09	2.0991937425304383e-09	1.7549858025617654e-09	1.5296815142236838e-09	5.813624018962556e-10	1.4141634356212274e-09	4.3291578673847027e-10	1.0772119585540156e-09	1.0837619064516491e-09	8.852825754620928e-10	1.1266202027012121e-09	1.0942531205479131e-09	1.5646455541489055e-09	9.403458706100705e-10	6.405197970416512e-10	1.1008927007102445e-09	1.4020336185974964e-09	8.586496251501158e-10
TraesCS1A01G007400.1	chr1A	7.300454680633677e-11	1.8734626941871918e-10	2.101013014107284e-10	1.7455613990626726e-10	2.26623257887098e-10	1.6751079094942579e-10	1.7018847258045805e-10	3.2474239961343885e-10	2.7149390228480103e-10	2.366396371658939e-10	8.99359680870833e-11	2.187691484710889e-10	6.69714798437439e-11	1.6664321602418787e-10	1.676564840015669e-10	1.3695200307951408e-10	1.7428660378777092e-10	1.6927946046698467e-10	2.4204852630054315e-10	1.4547021949503295e-10	9.908753617018872e-11	1.7030659443306732e-10	2.168926823749152e-10	1.328319221084879e-10
TraesCS1A01G007500.1	chr1A	16.86965947621326	16.15350098026523	16.66626115229507	26.489234629466825	28.137699260470324	20.220525489190063	8.21750128077646	13.440079750488053	20.599864553939046	15.506818221448748	26.055193575467168	19.617381076486115	13.165772771962239	17.816850522555505	16.19048988541597	17.476389563494678	20.43734745303432	21.601683288280075	15.026455587949721	11.037694743824913	15.378470634461884	13.509550677321824	14.960857958949097	10.536876679757363
TraesCS1A01G007600.1	chr1A	1.986397561256726e-09	5.097547878368411e-09	5.716694795000218e-09	4.749538292895758e-09	6.166244521524947e-09	4.557839767279299e-09	4.630697424704587e-09	8.835990891635814e-09	7.387140239706138e-09	6.438782496793844e-09	2.447088510135623e-09	5.952540245937967e-09	1.8222424500253147e-09	4.534233720928902e-09	4.56180396315648e-09	3.726358656098902e-09	4.742204422446948e-09	4.605963904337062e-09	6.585954209463701e-09	3.9581327722910045e-09	2.6960956380091655e-09	4.633911429451121e-09	5.901483046896539e-09	3.6142544221703336e-09
TraesCS1A01G007700.1	chr1A	8.843550786416933e-10	2.269456247218813e-09	2.5451038470891384e-09	2.11452047286455e-09	2.7452458486241204e-09	2.0291752388572224e-09	2.061611867163001e-09	3.933831561344712e-09	3.2887953121979385e-09	2.866581248572602e-09	1.0894572134165449e-09	2.6501035341504647e-09	8.112723236414073e-10	2.018665697673827e-09	2.0309401205833643e-09	1.6589952920988261e-09	2.111255393555148e-09	2.05060036836924e-09	2.9321029014735655e-09	1.7621823986227076e-09	1.2003165511684644e-09	2.063042759687143e-09	2.6273725893717468e-09	1.6090858728840528e-09
TraesCS1A01G007800.1	chr1A	14.739251313642736	22.69456247975299	8.483679490297127e-09	7.048401576215166e-09	9.150819495413734e-09	6.763917462857407e-09	13.744079121292046	13.11277188426181	10.962651051622446	9.55527083813061	36.31524045084968	26.501035350338327	148.73325933696222	127.84882752607123	128.62620764371619	5.529984312526071	7.037517978517161e-09	6.8353345612308e-09	29.321029024509333	5.873941334616299	36.009496539054986	96.27532879227681	52.54745179619284	64.36343492072572
TraesCS1A01G007900.1	chr1A	169.0802686100455	142.00311947672336	159.25078358385332	80.85523523164731	114.51596969500629	119.91459388428297	136.16455523359903	109.39798248154672	137.18974732026075	99.64782436510761	185.57087868907192	119.75944067153564	188.94918738044507	98.24173062714347	148.25862880964553	51.902852715715966	51.3738812505144	71.28277471710662	173.27331909251134	110.26227009137509	150.2110426932546	78.88682553235132	91.332475734913	212.5525814998964
TraesCS1A01G008000.1	chr1A	4.698538627426754e-10	1.20575186351509e-09	1.3522021895015072e-09	1.1234351857286183e-09	1.4585367318017523e-09	1.0780916480100235e-09	1.0953250822627296e-09	2.0900269576285586e-09	1.747322109100797e-09	1.5230016822838424e-09	5.788237014512938e-10	1.4079880494394755e-09	4.3102532478764725e-10	1.0725079762022514e-09	1.079029322786348	8.814167126871492e-10	1.1217004638247878e-09	1.0894747226415906e-09	1.5578130408120109e-09	9.362395567646116e-10	6.377227673602466e-10	1.0960853090040862e-09	1.3959112010490358e-09	8.549000634682376e-10
TraesCS1A01G008100.1	chr1A	0.14533525620306514	3.7296331843082703e-10	4.1826335172784133e-10	3.4750111328030654e-10	4.511547657576785e-10	0.33347544481023644	3.3880609253241577e-10	6.46487402021981e-10	0.5404818956112823	4.710950723678522e-10	0.3580836407887121	0.4355190413922591	0.26664961573810975	0.3317483027409994	3.337654858230203e-10	0.27263992896065053	3.469645288823184e-10	3.3699645855685394e-10	0.4818629266582931	2.8959773772953095e-10	1.972604867971587e-10	0.678082492266828	0.8635668578119614	0.26443779567311826
TraesCS1A01G008200.1	chr1A	1.1759184105800293e-09	3.0176740627864e-09	3.3842000152551386e-09	2.81165745936452e-09	3.650326902542091e-09	2.6981747256207145e-09	2.7413053971384163e-09	5.230777850239781e-09	4.373079376875219e-09	3.8116654124918026e-09	1.4486407391513254e-09	3.523817085482403e-09	1.0787409767909422e-09	2.6842002901673835e-09	2.7005214718139457e-09	2.2059500241022644e-09	2.807315914927611e-09	2.7266635134964394e-09	3.898788921813666e-09	2.343156923487389e-09	1.596049330333295e-09	2.7432080411140523e-09	3.4935919676527782e-09	2.1395859511937312e-09
TraesCS1A01G008300.1	chr1A	1.3712387583016907e-10	3.5189104937759843e-10	3.946316500371858e-10	3.2786744800151266e-10	4.256647131469006e-10	3.1463422352713945e-10	3.1966369223215604e-10	6.099611384412999e-10	5.099448976007849e-10	4.4447840090441794e-10	1.6892603351615924e-10	4.109124001550211e-10	1.257920127991137e-10	3.1300466425273863e-10	3.149078776605472e-10	2.5723588853698873e-10	3.2736118039406505e-10	3.1795630180746503e-10	4.5463787554709073e-10	2.7323558857149034e-10	1.8611535309111702e-10	3.198855595946505e-10	4.073878483945147e-10	2.494971723036021e-10
TraesCS1A01G008400.1	chr1A	5.99980676030145e-10	1.5396868591726148e-09	1.726696847932222e-09	1.4345724397687e-09	1.8624809196055835e-09	1.3766709334254388e-09	1.3986771961235973e-09	2.6688634198714125e-09	2.231245890245813e-09	1.9447995459646833e-09	7.391298938606669e-10	1.7979326951020808e-09	5.503985095336685e-10	1.3695408543697893e-09	1.3778682974217994e-09	1.1255265457547797e-09	1.4323572837316525e-09	1.3912065696185364e-09	1.9892519684718428e-09	1.195532668210573e-09	8.143411546031402e-10	1.3996479689327272e-09	1.7825111433470027e-09	1.0916660661759836e-09
TraesCS1A01G008500.1	chr1A	4.5495363453730513e-10	1.167514489407846e-09	1.309320513301671e-09	1.08780827709029e-09	1.412282924239329e-09	1.0439026951132997e-09	1.060589614537696e-09	2.0237470329680336e-09	1.6919102028925264e-09	1.4747035316828749e-09	1.1209355407917259	1.3633372656306126e-09	4.1735644556605166e-10	1.0384960953501716e-09	1.0448106328582496e-09	8.534648084793115e-10	1.086128567508991e-09	1.0549247842914344e-09	1.5084109359236806e-09	9.065490845627741e-10	6.174990009534735e-10	1.0613257326086078e-09	1.351643403975599e-09	8.277890677979975e-10
TraesCS1A01G008600.1	chr1A	1.241021159954702e-10	3.1847425230098687e-10	3.5715605697329316e-10	2.967320156076743e-10	3.8524211255202e-10	2.847554641226014e-10	2.8930731699903704e-10	5.520371087623298e-10	4.615187577671079e-10	4.022691871314878e-10	1.5288423025645478e-10	3.7189073047478646e-10	1.138463660627119e-10	2.832806534605716e-10	2.8500313110839217e-10	2.3280787451598293e-10	2.9627382493180664e-10	2.877620663032575e-10	4.1146388275196136e-10	2.4728818742686976e-10	1.684411923016107e-10	2.8950811506566986e-10	3.6870088239934166e-10	2.2580405367269483e-10
TraesCS1A01G008700.1	chr1A	4.194796669320572e-10	1.076480221227897e-09	1.2072292452079733e-09	1.0029889182528405e-09	1.302163397982851e-09	9.625067734670385e-10	9.778925685698443e-10	1.8659499933603897e-09	1.5599873800549025e-09	1.3597169015321635e-09	5.167665794633383e-10	1.2570341649966466e-09	3.84814032656418e-10	9.575217409369027e-10	9.633439168459103e-10	7.869178448551936e-10	1.0014401801788552e-09	9.726694404870341e-10	1.3907960481323606e-09	8.358629960978405e-10	5.6935093070369e-10	9.785712895202173e-10	1.2462521054199967e-09	7.632441112445474e-10
TraesCS1A01G008800.1	chr1A	1.0312766891508562e-09	2.6464905119324817e-09	2.9679326012381323e-09	2.4658146089315038e-09	3.2013250311431435e-09	2.3662906140028313e-09	2.4041160751261833e-09	4.587375462909967e-09	3.8351766420199605e-09	3.3428183889105422e-09	1.2704532999905394e-09	3.0903763257665163e-09	9.460523901888616e-10	2.3540350787570183e-09	2.368348702916703e-09	1.9346111233740302e-09	2.4620070883310836e-09	2.39127518995135e-09	3.419225428235947e-09	2.0549411357740836e-09	1.399730163503161e-09	2.4057846878140805e-09	3.0638689939958067e-09	1.8764100434590393e-09
TraesCS1A01G008900.1	chr1A	3.3346033440518393e-10	8.557350518955236e-10	9.596724216813384e-10	7.973140212764058e-10	1.0351391887890538e-09	7.651332253955435e-10	7.773639788372886e-10	1.4833145866640702e-09	1.2400932737109995e-09	1.0808906567448344e-09	4.1079739968702357e-10	9.992642458315286e-10	3.0590330385239013e-10	7.611704335237053e-10	7.657987024926943e-10	6.255509107604044e-10	7.960828705037491e-10	7.732119157590627e-10	1.105596651898607e-09	6.644592722079424e-10	4.525986995624891e-10	7.779035199233546e-10	9.906931767775698e-10	6.067317599201232e-10
TraesCS1A01G009000.1	chr1A	2.0320403129003337e-10	5.214677558922674e-10	5.848051017862987e-10	4.858671530346621e-10	6.30793034150333e-10	4.66256822274401e-10	4.737099978057887e-10	9.039021214295372e-10	7.556879376469924e-10	6.586730599490083e-10	2.503316858023537e-10	6.089315643468175e-10	1.8641133026699003e-10	4.638419764878481e-10	4.666623506534013e-10	3.8119816280520713e-10	4.851169144775758e-10	4.711798139469769e-10	6.737283972539197e-10	4.0490813691991703e-10	2.758045584995212e-10	4.740387833086605e-10	6.037085269881572e-10	3.6973015020628217e-10
TraesCS1A01G009000.2	chr1A	1.792279865098379e-10	4.599397724791042e-10	5.1580394457942e-10	4.285396849503391e-10	5.563657605484753e-10	4.112431772253671e-10	4.1781695253442274e-10	7.972507051031759e-10	6.665243136880886e-10	5.809562219483618e-10	2.2079504880457458e-10	5.370837256884617e-10	1.644166563737444e-10	4.091132591065779e-10	4.116008573086774e-10	3.3622058945922907e-10	4.2787796704476913e-10	4.1558530508316084e-10	5.942351799210724e-10	3.5713302359649543e-10	2.432623771107659e-10	4.1810694463398515e-10	5.324769545367505e-10	3.2610568773052706e-10
TraesCS1A01G009000.3	chr1A	0.17624330004204622	4.52280387788625e-10	0.5072142534078615	4.214032064403826e-10	5.471005922728932e-10	4.0439473774659355e-10	4.108590398659543e-10	7.839740758344634e-10	6.554246731926003e-10	5.712815483095821e-10	0.2171181453970465	5.281396614605076e-10	0.3233572462759169	0.40230028959200637	4.047464613775201e-10	0.6612430050983764	0.4207525085548661	0.4086645564855265	1.1686787437324162	0.35118568175838644	2.3921132469368794e-10	0.8222884058556511	5.236096069455022e-10	0.3206750446027822
TraesCS1A01G009100.1	chr1A	1.1759184105800293e-09	3.0176740627864e-09	3.3842000152551386e-09	2.81165745936452e-09	3.650326902542091e-09	2.6981747256207145e-09	2.7413053971384163e-09	5.230777850239781e-09	4.373079376875219e-09	3.8116654124918026e-09	1.4486407391513254e-09	3.523817085482403e-09	1.0787409767909422e-09	2.6842002901673835e-09	2.7005214718139457e-09	2.2059500241022644e-09	2.807315914927611e-09	2.7266635134964394e-09	3.898788921813666e-09	2.343156923487389e-09	1.596049330333295e-09	2.7432080411140523e-09	3.4935919676527782e-09	2.1395859511937312e-09
TraesCS1A01G009200.1	chr1A	1.1759184105800293e-09	3.0176740627864e-09	3.3842000152551386e-09	2.81165745936452e-09	3.650326902542091e-09	2.6981747256207145e-09	2.7413053971384163e-09	5.230777850239781e-09	4.373079376875219e-09	3.8116654124918026e-09	1.4486407391513254e-09	3.523817085482403e-09	1.0787409767909422e-09	2.6842002901673835e-09	2.7005214718139457e-09	2.2059500241022644e-09	2.807315914927611e-09	2.7266635134964394e-09	3.898788921813666e-09	2.343156923487389e-09	1.596049330333295e-09	2.7432080411140523e-09	3.4935919676527782e-09	2.1395859511937312e-09
TraesCS1A01G009300.1	chr1A	1.7092380392068733e-10	4.386293514614068e-10	4.91905165045028e-10	4.086841263413083e-10	5.305876276133459e-10	3.9218901889482983e-10	3.984582110217079e-10	7.603116335138045e-10	6.356421969564456e-10	5.540387374789513e-10	2.1056493666774625e-10	5.121989885967273e-10	1.5679872815944595e-10	3.9015778641829317e-10	3.9253012656231296e-10	3.206424578321798e-10	4.0805306785683297e-10	3.963299626448359e-10	5.667024405813351e-10	3.4058595472453705e-10	2.3199128471087603e-10	3.9873476689743565e-10	5.078056632886881e-10	3.109962105388823e-10
TraesCS1A01G009300.2	chr1A	1.7092380392068733e-10	4.386293514614068e-10	4.91905165045028e-10	4.086841263413083e-10	5.305876276133459e-10	3.9218901889482983e-10	3.984582110217079e-10	7.603116335138045e-10	6.356421969564456e-10	5.540387374789513e-10	2.1056493666774625e-10	5.121989885967273e-10	1.5679872815944595e-10	3.9015778641829317e-10	3.9253012656231296e-10	3.206424578321798e-10	4.0805306785683297e-10	3.963299626448359e-10	5.667024405813351e-10	3.4058595472453705e-10	2.3199128471087603e-10	3.9873476689743565e-10	5.078056632886881e-10	3.109962105388823e-10
TraesCS1A01G009400.1	chr1A	1.4559747573487505e-10	0.3736362341286506	4.1901799918246974e-10	3.4812808867639184e-10	0.4519687576679381	3.340771142006703e-10	0.33941738036399804	6.476538204288767e-10	5.414570541056597e-10	0.9438900823203885	0.8968242737405709	1.3089144658827454	1.3356535774881087e-10	3.3234685595441887e-10	3.3436767885111774e-10	2.731318365431085e-10	3.475905361513889e-10	3.376044810350801e-10	4.827323225249668e-10	2.9012024154140197e-10	1.976163920507395e-10	3.3965295772927705e-10	4.3256246960788795e-10	2.649149046471264e-10
TraesCS1A01G009500.1	chr1A	1.9652335080926517e-10	5.043236104930697e-10	5.655786326864752e-10	4.698934384143444e-10	6.100546330275824e-10	4.509278308571606e-10	4.5813597048066687e-10	8.74184791409936e-10	7.308434027106531e-10	6.37018055238356e-10	2.4210160298145435e-10	5.889118964778811e-10	1.8028273858697942e-10	4.4859237726085034e-10	4.5132002679630325e-10	3.686656204664058e-10	4.691678652344774e-10	4.556889707487201e-10	6.515784225496813e-10	3.915960885828239e-10	2.667370113707698e-10	4.584539465971429e-10	5.838605754159438e-10	3.575746384186784e-10
TraesCS1A01G009600.1	chr1A	1.7892993553448895e-10	4.5917490589515895e-10	5.149461774875475e-10	4.278270358068519e-10	5.554405403258337e-10	4.105592916756575e-10	4.171221349858622e-10	7.959249001612084e-10	6.654159029668779e-10	5.799901084972283e-10	2.2042787300279314e-10	5.36190570933991e-10	1.6414323621347766e-10	4.084329155493053e-10	4.109163769472994e-10	3.3566146431046097e-10	4.2716641831908494e-10	4.148941986999849e-10	5.93246983945594e-10	3.5653912167255444e-10	2.428578387896283e-10	4.17411644836922e-10	5.315914607099155e-10	3.2556338337177344e-10
TraesCS1A01G009700.1	chr1A	1.1111518199800965e-09	2.8514682624263916e-09	3.197806899096508e-09	2.6567985287282644e-09	3.44927619534528e-09	2.5495661348808473e-09	2.590321278879502e-09	4.942679930777349e-09	4.13222130448278e-09	3.6017285911497408e-09	1.368853297408051e-09	3.3297342167467115e-09	1.0193266717009078e-09	2.536361375734756e-09	2.5517836282716974e-09	2.084451916062208e-09	2.6526961054995837e-09	2.5764858328907835e-09	3.6840535595106764e-09	2.2141018089407514e-09	1.5081429988863664e-09	2.5921191300716256e-09	3.3011738214137267e-09	2.0217430072381387e-09
TraesCS1A01G009800.1	chr1A	2.113188894953964e-10	5.422923274860011e-10	6.08159020744704e-10	5.052700311591232e-10	6.559834597366965e-10	4.848765709871594e-10	4.926273856068709e-10	9.399990310250866e-10	7.858659829474615e-10	6.849768613610472e-10	2.6032856490804506e-10	6.332489623338262e-10	1.938555797899271e-10	4.823652894605216e-10	4.852982939528171e-10	3.964211336275427e-10	5.044898321752073e-10	4.899961600358577e-10	7.006334265386916e-10	4.2107795449904303e-10	2.868186848945921e-10	4.929693010054384e-10	6.278173454145254e-10	3.8449515129471635e-10
TraesCS1A01G009900.1	chr1A	1.1497403515733501e-10	2.9504952100974776e-10	3.3088616355744805e-10	2.749064906840822e-10	3.569064059653798e-10	2.6381085028775996e-10	2.680279008065878e-10	5.114331326414319e-10	4.2757267638548444e-10	3.726810884163846e-10	1.41639139055045e-10	3.445370578681815e-10	1.0547262622586418e-10	2.624445163494022e-10	2.640403006279352e-10	2.1568416086057756e-10	2.7448200129924456e-10	2.665963079090909e-10	3.811994867454502e-10	2.290994035609219e-10	1.560518401341013e-10	2.6821392957642286e-10	3.4158183263426094e-10	2.0919549193327844e-10
TraesCS1A01G009900.2	chr1A	1.1474923700825385e-10	2.9447263783678166e-10	3.3023921229560455e-10	2.7436899132440834e-10	3.562085797183804e-10	2.6329504521254397e-10	2.6750385052061687e-10	5.104331745079345e-10	4.26736682883842e-10	3.719524193846427e-10	1.4136220508248802e-10	3.4386341626907916e-10	1.052664053071858e-10	2.6193138274118265e-10	2.63524046929587e-10	2.1526245347176378e-10	2.7394533190459623e-10	2.6607505668495297e-10	3.8045416247346306e-10	2.2865146658275447e-10	1.5574672633362581e-10	2.6768951556551986e-10	3.409139691150685e-10	2.0878647124162077e-10
TraesCS1A01G010000.1	chr1A	2.5022449899551787e-09	6.4213296917431535e-09	7.201262823159189e-09	5.982945523996595e-09	7.76755608331631e-09	5.741464823123148e-09	5.833242879957328e-09	1.1130608681324186e-08	9.305506115908896e-09	8.110869424255813e-09	3.08257273563596e-09	7.498354960968369e-09	2.295460450613284e-09	5.711728524425943e-09	5.7464584807203724e-09	4.694056446636213e-09	5.97370712129945e-09	5.802086313602889e-09	8.296260147580245e-09	4.9860199650952576e-09	3.396244505244104e-09	5.837291529347342e-09	7.4340387218657946e-09	4.552839872888986e-09
TraesCS1A01G010100.1	chr1A	9.45211138226114e-10	2.4256267356804297e-09	2.7202427648244085e-09	2.260029202329607e-09	2.9341573491882985e-09	2.168811016640955e-09	2.2034797408916407e-09	4.204534465273265e-09	3.5151106557898905e-09	3.0638423300995597e-09	1.1644271827146084e-09	2.8324679061930297e-09	8.67099262457141e-10	2.1575782713058467e-09	2.1706973470363925e-09	1.7731574864306632e-09	2.256539439670949e-09	2.1917104962072406e-09	3.133872793668672e-09	1.883445316243889e-09	1.282915201102458e-09	2.2050090989335497e-09	2.80817275291563e-09	1.7198135976652393e-09
TraesCS1A01G010200.1	chr1A	1.0060452040025497e-10	2.5817407830290376e-10	2.8953183861229095e-10	2.4054853439163497e-10	3.123000575807399e-10	2.3083963290724208e-10	2.3452963425728393e-10	4.4751395352682563e-10	3.741344207424802e-10	3.2610321200841507e-10	1.2393700573384412e-10	3.014766370468816e-10	9.229060250245089e-11	2.2964406409566674e-10	2.3104040642447502e-10	1.8872784217424703e-10	2.401770979110579e-10	2.332769625852494e-10	3.335569764805521e-10	2.004664408593699e-10	1.36548399930338e-10	2.346924130546384e-10	2.9889075740086887e-10	1.8305013046678488e-10
TraesCS1A01G010300.1	chr1A	1.1759184105800293e-09	3.0176740627864e-09	3.3842000152551386e-09	2.81165745936452e-09	3.650326902542091e-09	2.6981747256207145e-09	2.7413053971384163e-09	5.230777850239781e-09	4.373079376875219e-09	3.8116654124918026e-09	1.4486407391513254e-09	3.523817085482403e-09	1.0787409767909422e-09	2.6842002901673835e-09	2.7005214718139457e-09	2.2059500241022644e-09	2.807315914927611e-09	2.7266635134964394e-09	3.898788921813666e-09	2.343156923487389e-09	1.596049330333295e-09	2.7432080411140523e-09	3.4935919676527782e-09	2.1395859511937312e-09
TraesCS1A01G010400.1	chr1A	1.3709475629824508e-10	3.518163220364692e-10	3.9454784633150794e-10	3.2779782229584233e-10	0.85114863898816	3.145674080199134e-10	3.1959580867041636e-10	6.098316075136207e-10	5.09836606053195e-10	1.3331520357754516	1.182231123668262	0.4108251394912752	1.2576529969382615e-10	3.1293819479759897e-10	3.148410040403177e-10	0.2571812623578699	3.2729166219903553e-10	3.178887808259812e-10	4.5454132896065045e-10	2.7317756444989945e-10	1.8607582976279017e-10	3.1981762891731036e-10	0.4073013361986318	2.494441892557567e-10
TraesCS1A01G010400.2	chr1A	1.5182954078279304e-10	3.8962912993173416e-10	4.3695338861125844e-10	3.6302914985680183e-10	4.71314550680999e-10	3.4837674608790506e-10	3.5394559337464503e-10	6.753755973145908e-10	5.646332497423553e-10	4.921458869844778e-10	1.870422779384002e-10	4.549801457972341e-10	1.3928240739845423e-10	3.4657242692894954e-10	3.4867974788942995e-10	2.848228041467881e-10	3.6246858826323103e-10	3.5205509616875475e-10	5.033949007703911e-10	3.0253837041264737e-10	2.0607504288640141e-10	3.541912546029197e-10	4.5107760824115124e-10	2.7625415973785475e-10
TraesCS1A01G010500.1	chr1A	5.051480496153647e-10	1.2963247734504957e-09	1.453776062891292e-09	1.207824683248139e-09	1.5680981764441379e-09	1.1590750581891803e-09	1.1776030227143902e-09	2.2470242877790613e-09	1.878576352037946e-09	1.6374055645211264e-09	6.223034161143017e-10	1.5137524099607505e-09	4.634028139735738e-10	1.1530719556352844e-09	1.160083167469371e-09	9.476264188044938e-10	1.2059596535956637e-09	1.1713131994597383e-09	1.6748318607791104e-09	1.0065674107938783e-09	6.85626825002331e-10	1.1784203556898392e-09	1.5007683804705597e-09	9.191179086113917e-10
TraesCS1A01G010600.1	chr1A	7.911509894711226e-10	2.030273358418791e-09	2.276869863204744e-09	1.8916665994989234e-09	2.4559184675191273e-09	1.8153160837815838e-09	1.8443341458688611e-09	3.5192365683598524e-09	2.9421820807653125e-09	2.5644660679632344e-09	9.74636967884899e-10	2.3708034067767636e-09	7.257705836497884e-10	1.8059141658111437e-09	1.8168949608160001e-09	1.484150200039391e-09	1.8887456339402673e-09	1.8344831726832663e-09	2.6230822525437536e-09	1.5764621948462947e-09	1.0738126009227682e-09	1.8456142335436453e-09	2.350468125295803e-09	1.4395008421634293e-09
TraesCS1A01G010700.1	chr1A	2.938457930853146e-10	7.540751299361555e-10	8.45664910502991e-10	7.025944220259998e-10	9.121663493380101e-10	6.742366519643934e-10	6.850144119385484e-10	1.3070992443248248e-09	1.0927722248086004e-09	9.52482617868912e-10	3.61995341736039e-10	8.805532908192259e-10	2.6956249260729513e-10	6.707446332735064e-10	6.748230714728521e-10	5.51236487588595e-10	7.015095299477734e-10	6.813556071504532e-10	9.742535812816128e-10	5.855225994513321e-10	3.988307156818293e-10	6.854898564276807e-10	8.730004507243402e-10	5.346530210311146e-10
TraesCS1A01G010800.1	chr1A	2.910636642959585e-10	7.469355547654344e-10	8.376581642809156e-10	6.95942265640722e-10	9.035299682126275e-10	6.67852986639212e-10	6.785287028985531e-10	1.2947236428231016e-09	1.082425869208519e-09	9.434645227493234e-10	3.585679737574741e-10	8.722162217898282e-10	2.670102778441061e-10	6.643940303435046e-10	6.6843385393411e-10	5.46017386488793e-10	6.948676453089533e-10	6.749045396346012e-10	9.650293589160067e-10	5.799788778154087e-10	3.95054590781325e-10	6.789996458844069e-10	8.64734891903235e-10	5.295909320132365e-10
TraesCS1A01G010900.1	chr1A	1.4404141266169172e-11	3.696430220374693e-11	4.145397729478728e-11	3.444074935163929e-11	4.471383720064276e-11	3.305066878702721e-11	3.357898799680918e-11	6.407320644774849e-11	5.3567026883788024e-11	4.669011605475355e-11	1.7744790508357563e-11	4.3164184384520835e-11	1.3213788711444417e-11	3.287949216407982e-11	3.3079414713087224e-11	2.7021275870326046e-11	3.438756860472698e-11	3.339963562126655e-11	4.7757315381327186e-11	2.8701960128395914e-11	1.9550438036390345e-11	3.360229399521663e-11	4.2793948777111835e-11	2.620836447054505e-11
TraesCS1A01G011000.1	chr1A	1.3648609036119156e-09	3.5025434682235384e-09	3.927961539905013e-09	3.2634248312708705e-09	4.236848772717988e-09	3.1317080853398995e-09	3.1817688436130886e-09	6.071241098904101e-09	5.07573060867758e-09	4.424110595048625e-09	1.6814033103468871e-09	4.0900117968918384e-09	1.2520693366981553e-09	3.1154882860505145e-09	3.134431898574749e-09	2.560394425437935e-09	3.2583857025269733e-09	3.1647743528743035e-09	4.525232807771042e-09	2.7196472536883224e-09	1.8524970028604204e-09	3.1839771978258235e-09	4.054930211926798e-09	2.483367203393993e-09
TraesCS1A01G011100.1	chr1A	1.0071438503182766	2.584560156739054e-09	2.8984802002731216e-09	2.408112238987709e-09	3.1264110319807137	2.310917198698553e-09	2.347857508625571e-09	4.480026583122683e-09	3.7454299187277615e-09	3.264593312871457	1.2407235035789044e-09	3.0180586270356305e-09	9.239138787179835e-10	2.2989484544491317e-09	2.3129271264053916e-09	1.8893394141079711	2.40439381793332e-09	2.335317112183378e-09	3.3392123526922045e-09	2.006853589695127e-09	1.3669751674773462e-09	2.3494870742146874e-09	2.992171591640211e-09	1.8325002938845416
TraesCS1A01G011200.1	chr1A	1.262376236621893e-10	3.2395445061981494e-10	3.6330187883751875e-10	3.018380807960738e-10	3.9187122985835117e-10	2.8965544082240366e-10	2.942856204593255e-10	5.615363785259366e-10	4.694604180493732e-10	4.0919130063707456e-10	1.55515010910066e-10	3.782901016679388e-10	1.1580539621787785e-10	2.8815525211222e-10	2.8990736957877513e-10	2.3681395448418906e-10	3.013720057284431e-10	2.9271377960687233e-10	4.1854421550170173e-10	2.515434397721112e-10	1.7133967195013274e-10	2.944898737918683e-10	3.7504536375466857e-10	2.2968961423647993e-10
TraesCS1A01G011200.2	chr1A	1.262376236621893e-10	3.2395445061981494e-10	3.6330187883751875e-10	3.018380807960738e-10	3.9187122985835117e-10	2.8965544082240366e-10	2.942856204593255e-10	5.615363785259366e-10	4.694604180493732e-10	4.0919130063707456e-10	1.55515010910066e-10	3.782901016679388e-10	1.1580539621787785e-10	2.8815525211222e-10	2.8990736957877513e-10	2.3681395448418906e-10	3.013720057284431e-10	2.9271377960687233e-10	4.1854421550170173e-10	2.515434397721112e-10	1.7133967195013274e-10	2.944898737918683e-10	3.7504536375466857e-10	2.2968961423647993e-10
TraesCS1A01G011300.1	chr1A	0.9947291341356167	2.552701171756138e-09	2.8627516307782296e-09	2.3784282668584305e-09	3.0878728343537874e-09	2.282431316434164e-09	2.3189162758536067e-09	4.4248028347945145e-09	3.699261291070101e-09	3.2243517896117097e-09	1.2254295312697652e-09	2.9808560553618476e-09	9.125251097969605e-10	2.270610106782578e-09	2.284416468452783e-09	1.866050174471715e-09	2.374755681502709e-09	2.3065304605694074e-09	3.2980510293924545e-09	1.9821157950609807e-09	1.3501249342881032e-09	2.320525754347634e-09	2.9552881205568186e-09	1.8099116906091812e-09
TraesCS1A01G011400.1	chr1A	1.9906851908986616e-10	5.10855091110001e-10	5.72903425339214e-10	4.759790148600436e-10	6.179554330852937e-10	4.567677842632662e-10	4.6406927629632763e-10	8.855063335743569e-10	7.403085346606521e-10	6.452680578038851e-10	2.45237053898883e-10	5.965388775608508e-10	1.8261757516442408e-10	4.5440208427440434e-10	4.5716505952076966e-10	3.734401983447866e-10	4.752440448027315e-10	4.615905855410253e-10	6.600169960147095e-10	3.9666763829619997e-10	2.7019151475577513e-10	4.6439137051236946e-10	5.914221369846978e-10	3.6220557730661684e-10
TraesCS1A01G011500.1	chr1A	3.030888297692188e-09	7.777948640702974e-09	8.72265637734775e-09	7.246948099488833e-09	9.408589068073415	6.954450349135081e-09	7.065618136286341e-09	1.3482145726674364e-08	1.1271458112227676e-08	9.824433387126757e-09	7.467640997105442	9.082514459764502e-09	2.780416883841443e-09	6.9184317338117055e-09	6.9604990048162246e-09	5.685758518512721	7.235757921573982e-09	7.027879196758428e-09	1.0048991164674661e-08	6.039404464763269e-09	4.113760950013985e-09	7.070522134139035e-09	9.004610282823356e-09	5.514707451668349e-09
TraesCS1A01G011600.1	chr1A	161.3948018550978	122.71874522765016	129.02262559020366	107.19444064541862	213.39202685371765	137.15721522591082	27.86993821120805	79.76936222945154	144.49383108870026	174.3836926311879	342.4224547205765	188.08373694657962	139.83179911926769	156.91387530285726	102.95738111977049	67.28147574072584	135.5699643988478	62.37242787816132	89.18479659639704	136.97704849148914	109.52888529817898	188.25265182842412	159.83183252899414	277.3438289289255
TraesCS1A01G011700.1	chr1A	1.2658415831537963e-09	3.2484373734700658e-09	3.64299178112759e-09	3.0266665591982778e-09	3.929469548030604e-09	2.904505734050534e-09	2.950934633390178e-09	5.6307785093757645e-09	4.7074913292245e-09	4.103145708741175e-09	1.5594191486158387e-09	3.793285450842822e-09	1.1612329338396615e-09	2.8894626652978304e-09	2.9070319373056e-09	2.3746403200630255e-09	3.021993014304428e-09	2.9351730762932262e-09	4.1969316040700065e-09	2.5223395117540715e-09	1.7181001614764293e-09	2.9529827736698327e-09	3.7607490004732846e-09	2.303201347461487e-09
TraesCS1A01G011800.1	chr1A	1.3591141208598652e-10	3.4877959167783867e-10	3.9114227544738333e-10	3.249684095139203e-10	4.2190094094644373e-10	3.118521946033205e-10	3.168371922166296e-10	6.045677978487662e-10	5.054359111377884e-10	4.4054827609642093e-10	1.674323717461216e-10	0.40727906986619256	1.2467974658067942e-10	3.102370440635565e-10	3.1212342905807494e-10	2.549613817330827e-10	3.244666183779491e-10	3.1514489871779904e-10	4.506179195948848e-10	2.708196107357003e-10	1.8446970154799556e-10	3.170570978045504e-10	0.40378568255986463	2.4729109204323333e-10
TraesCS1A01G011900.1	chr1A	1.8497971558980975e-10	4.747000173265712e-10	5.323569651504501e-10	0.8845844962538232	1.148440957305228	0.8488813324392099	4.3122540487936695e-10	8.228358280176618e-10	6.879142057032937e-10	5.996000892429798e-10	0.2278807354124302	5.54319650409696e-10	1.6969306483043763e-10	4.2224239521544224e-10	4.2480982464924244e-10	3.4701047657081466e-10	0.44160929479555155	0.8578442806063121	0.6133051920390081	3.6859402607294456e-10	0.25106907828917197	4.3152470331564887e-10	5.495650401837751e-10	3.36570970545948e-10
TraesCS1A01G012000.1	chr1A	0.36774662929719487	4.718607406635528e-10	5.291728306394392e-10	4.396468086559731e-10	5.707859497281709e-10	4.219020006738172e-10	4.28646158652518e-10	8.179142807694787e-10	6.837996519238096e-10	0.5960137606239259	2.2651773448991104e-10	5.510041526430758e-10	1.6867809634241735e-10	4.1971687818339317e-10	4.222689513032914e-10	3.4493493683626975e-10	4.389679399872567e-10	4.2635667015367286e-10	6.096368892269163e-10	3.663893907703152e-10	2.495673831822783e-10	4.289436669244131e-10	5.462779807010467e-10	3.3455787160505796e-10
TraesCS1A01G012100.1	chr1A	3.3174676639693526e-10	8.513376466956493e-10	9.54740908723058e-10	7.932168269224673e-10	1.029819871272152e-09	7.612013999824112e-10	7.733693026870455e-10	1.4756922095486328e-09	1.2337207491801106e-09	1.075336234048304e-09	4.086864161326195e-10	9.941292805394858e-10	3.0433134442868824e-10	7.572589718920315e-10	7.618634573616938e-10	6.223363634286449e-10	0.7919920035130908	7.692385760069605e-10	1.0999152713646982e-09	6.610447846837495e-10	4.5027290973945473e-10	7.739060712084349e-10	9.856022560335946e-10	6.03613919427214e-10
TraesCS1A01G012200.1	chr1A	8.665492716891759e-10	2.22376249727481e-09	2.493860145469894e-09	2.0719462351558677e-09	2.689972442275984e-09	1.988319361564795e-09	2.0201029033946183e-09	3.854626899035758e-09	3.2225779569187856e-09	2.80886484759463e-09	1.067521833280641e-09	2.5967457448722673e-09	7.949379815546676e-10	1.978021421881736e-09	1.990048708759538e-09	1.6255927023250242e-09	2.0687468956983334e-09	2.0093131126302623e-09	2.873067272584836e-09	1.7267022161001027e-09	1.1761491038295018e-09	2.021504986002167e-09	2.574472470122651e-09	1.5766881707454477e-09
TraesCS1A01G012300.1	chr1A	1.4978635902747936e-09	3.8438586089784996e-09	4.310732734048889e-09	3.581438387914435e-09	4.649720346857559e-09	3.436886135419425e-09	3.491825204243598e-09	6.6628701619063565e-09	5.570349368687923e-09	4.855230421016239e-09	1.8452523568308066e-09	4.488574431391738e-09	1.3740807337777895e-09	3.4190857524405876e-09	3.439875378250246e-09	2.8098992186360625e-09	3.575908207181573e-09	3.4731746378411722e-09	4.966206770477269e-09	2.9846708839781353e-09	2.0330187525591153e-09	3.4942487577067624e-09	4.450074223297854e-09	2.7253658635855184e-09
TraesCS1A01G012400.1	chr1A	5.23584109820305e-10	1.343635896569127e-09	1.5068335834347696e-09	1.251905876067414e-09	1.6253280368983032e-09	1.201377067612143e-09	1.2205812352222146e-09	2.3290324734644283e-09	1.947137532769258e-09	1.6971648916934302e-09	6.450152196221229e-10	1.568998848280486e-09	4.803153254324634e-10	1.1951548749193184	1.2024219692018298e-09	9.822113246002783e-10	1.2499727796393012e-09	1.2140618563743272e-09	1.7359571111725085e-09	1.0433034476841658e-09	7.106497018272334e-10	1.2214283978683004e-09	1.555540949100872e-09	9.526623578307855e-10
TraesCS1A01G012500.1	chr1A	1.1446439847667307e-10	2.9374167738825063e-10	3.29419469570048e-10	2.736879335445251e-10	3.5532437402404394e-10	2.626414759513781e-10	2.668398338703884e-10	5.091661418052553e-10	4.2567740742987504e-10	3.7102913323723395e-10	1.4101130599185773e-10	3.430098545974892e-10	1.0500510571954386e-10	2.612811984577825e-10	2.628699092244426e-10	2.147281140482523e-10	2.732653257615706e-10	2.6541458668608957e-10	3.7950977270845793e-10	2.2808389202031496e-10	1.553601209845707e-10	2.670250380446125e-10	3.4006772876620125e-10	2.082682069513047e-10
TraesCS1A01G012500.2	chr1A	1.1446439847667307e-10	2.9374167738825063e-10	3.29419469570048e-10	2.736879335445251e-10	3.5532437402404394e-10	2.626414759513781e-10	2.668398338703884e-10	5.091661418052553e-10	4.2567740742987504e-10	3.7102913323723395e-10	1.4101130599185773e-10	3.430098545974892e-10	1.0500510571954386e-10	2.612811984577825e-10	2.628699092244426e-10	2.147281140482523e-10	2.732653257615706e-10	2.6541458668608957e-10	3.7950977270845793e-10	2.2808389202031496e-10	1.553601209845707e-10	2.670250380446125e-10	3.4006772876620125e-10	2.082682069513047e-10
TraesCS1A01G012500.3	chr1A	1.1031770461524882e-10	2.8310031792032356e-10	3.174856131878112e-10	2.6377305967038987e-10	3.4245206245652905e-10	2.53126781333864e-10	2.571730456303812e-10	4.907206151369856e-10	4.1025642137807506e-10	3.5758788644190013e-10	1.3590289914457922e-10	3.305836602750921e-10	1.0120109300379825e-10	2.5181578251912053e-10	2.533469391705154e-10	2.0694917348464507e-10	2.6336576167041326e-10	2.557994307774343e-10	3.6576129837247147e-10	2.1982111261014638e-10	1.4973190060713924e-10	2.5735154042577145e-10	3.27748118633181e-10	2.0072328899613098e-10
TraesCS1A01G012500.4	chr1A	2.215175558860153	2.9659013467542152	4.157673747200357	4.375413838605834	5.979500133062238	2.2099029158793106	2.245228499447245	3.855777019380345	3.581710544747989	5.931595094703057	4.034063559271064	5.772267880132979	3.0039950877774064	2.8579945505591886	4.202467473366231	1.6260777368790622	3.448940259729985	2.0099126393678723	2.8739245210833597	1.7272174191015337	2.483722298311626	2.92082288392317	3.71979201477784	3.1543172267449027
TraesCS1A01G012600.1	chr1A	5.746995912286354	1.6386776067949885e-09	7.350843951887448	1.5268050907366186	3.9644499910932196	2.9303618696467284	8.931612244984096	8.521356203972914	11.873494452940946	2.0698361142017795e-09	1.5733012189747368	1.9135267852916314e-09	18.159339945200074	2.9151848863278067	2.932910561359346	1.1978897768973389	1.5244475161587285	1.4806511082161065	14.820025547646246	21.63074536913372	13.86715857420761	1.4896352270738028e-09	1.8971137391111526e-09	1.1618523117758245e-09
TraesCS1A01G012700.1	chr1A	1.354835693035101	1.7384082481319347e-09	1.949554888116549e-09	1.6197271198227928e-09	2.102864081317532e-09	1.5543524914646091e-09	1.5791990168195076e-09	3.0133232316701366e-09	2.5192241111274875e-09	10.979036263780275	8.34526511934531	6.089954608314893	0.6214363030959665	1.5463021624087296	4.667113185267738	2.541587752020307	1.6172260622195787e-09	1.5707641872051243	2.245996978191121	1.3498354155242147e-09	9.194449972224333e-10	1.580295083495923e-09	4.025145836726897	1.2325631555145421e-09
TraesCS1A01G012800.1	chr1A	0.9157151887290997	2.349933419106005e-09	2.635355756560384e-09	2.189503468356201e-09	2.8425949921923515e-09	2.101131807611025e-09	2.1347186709631074e-09	4.073329134442042e-09	3.4054192594390003e-09	2.9682330658978716e-09	1.1280904479348618e-09	2.7440788367799138e-09	8.400408457563509e-10	2.09024958766226e-09	2.1029592737955408e-09	1.7178249123860183e-09	2.1861226060925648e-09	2.1233166934887165e-09	3.0360781816676634e-09	1.8246711361625197e-09	1.2428809678765657e-09	2.1362003043569e-09	2.72054183012961e-09	1.6661456556104376e-09
TraesCS1A01G012900.1	chr1A	1.0429389460801761	0.8921395057223677	1.0004985505520036e-09	8.312331422677014e-10	2.1583516106597984	7.976833195292259e-10	8.104343904302589e-10	1.5464173612178997e-09	1.2928489918710259e-09	2.253747240176954	1.2848203005802568	1.041774679552956e-09	0.318916961147257	0.7935519444133114	7.98377107176013e-10	6.521629311966306e-10	8.299496162063857e-10	8.061056913890928e-10	1.152630650552344e-09	6.927265218064494e-10	4.718530330387608e-10	8.109968845296792e-10	2.0656779657516062	6.325431810475813e-10
TraesCS1A01G013000.1	chr1A	5.388358295705168e-11	1.3827752779148098e-10	1.5507268244512737e-10	1.2883732119114613e-10	1.672672956761212e-10	1.2363725268055857e-10	1.2561361013512985e-10	2.396875920024739e-10	2.003856587851177e-10	1.7466023799833066e-10	6.638041614173087e-11	1.6147029295800347e-10	4.943066490762268e-11	1.2299690838009294e-10	1.237447865809078e-10	1.0108226051516093e-10	1.2863838054379921e-10	1.2494268165508266e-10	1.7865245956729013e-10	1.0736943084839133e-10	7.313505403163165e-11	1.257007941383536e-10	1.600853009132272e-10	9.804128930851837e-11
TraesCS1A01G013000.2	chr1A	2.2549046713532518e-10	5.786598185364071e-10	6.48943698349658e-10	5.39154713653902e-10	6.999753648255703e-10	5.173936166139616e-10	5.256642204083097e-10	1.0030377365636183e-09	8.38568137584525e-10	7.309131370792872e-10	2.7778685497522794e-10	6.757162346943203e-10	2.0685602384150447e-10	5.147139222151216e-10	5.178436213852099e-10	4.2300613455541143e-10	5.383221925585953e-10	5.228565382150001e-10	7.476196710009441e-10	4.493165040148713e-10	3.0605346921165866e-10	5.260290655157577e-10	6.699203598467953e-10	4.1028036577204274e-10
TraesCS1A01G013100.1	chr1A	1.1325951007165546e-09	2.906496597315322e-09	3.2595189620615283e-09	2.7080700792826695e-09	3.515841174553698e-09	2.598768288361004e-09	2.6403099351385802e-09	5.038064982073052e-09	4.211965926148237e-09	3.671235634136841e-09	1.3952697645510134e-09	3.3939922454909463e-09	1.0389978881723287e-09	2.5853087005296376e-09	2.601028575483958e-09	2.124678181109023e-09	2.703888486482909e-09	2.626207489314992e-09	3.755149329957373e-09	2.2568300894641695e-09	1.537247512899963e-09	2.642142481704587e-09	3.3648806846339917e-09	2.060759100360278e-09
TraesCS1A01G013200.1	chr1A	6.264110298936892e-11	1.6075131578398346e-10	1.8027613122211052e-10	1.4977682371347965e-10	1.944526944979243e-10	1.4373160531396976e-10	1.4602917359101403e-10	2.7864322140322527e-10	2.329536753254895e-10	2.0304718721696092e-10	7.716900502562368e-11	1.8771352415387535e-10	5.7464466937534184e-11	1.4298718797806068e-10	1.4385661634250493e-10	1.17510825075892e-10	1.4954554990250903e-10	1.452492013302489e-10	2.0768825131726206e-10	1.248198283518898e-10	8.50214518099145e-11	1.4613052732113472e-10	1.8610343394540803e-10	1.1397561490445938e-10
TraesCS1A01G013300.1	chr1A	3.3106626020945436e-09	8.495913130614018e-09	9.527824658333698e-09	7.915897154826264e-09	1.0277074202541579e-08	7.596399612132164e-09	7.717829041174311e-09	1.4726651486059689e-08	1.231190039951023e-08	1.0731304161323074e-08	4.078480850226039e-09	9.92090040989661e-09	3.037070750042191e-09	7.55705620154817e-09	7.6030066052608e-09	6.2105977601648356e-09	7.90367403741158e-09	7.676606507228437e-09	1.0976590349106167e-08	6.59688795381834e-09	4.493492730015276e-09	7.723185715751868e-09	9.835805078160897e-09	6.023757370283889e-09
TraesCS1A01G013400.1	chr1A	1.08318658961147e-09	2.7797031215935126e-09	3.1173251818373676e-09	2.589932793944835e-09	3.36246555284498e-09	2.4853992019559937e-09	2.525128629243273e-09	4.818283623794698e-09	4.028222446148482e-09	3.5110810594932878e-09	1.3344022916008014e-09	3.2459321810903344e-09	9.936724769433346e-10	2.4725267773521705e-09	2.487560885949423e-09	2.0319908779062805e-09	2.5859336196229165e-09	2.511641390787828e-09	3.5913340907310453e-09	2.1583777701251284e-09	1.4701863797868774e-09	2.5268812325027087e-09	3.218090587653314e-09	1.9708602134318097e-09
TraesCS1A01G013500.1	chr1A	1.065312223446264e-09	2.733833433118372e-09	3.0658841722360904e-09	2.547194629028253e-09	3.306979322600013e-09	2.4443860138049046e-09	2.4834598399818324e-09	4.738773993039009e-09	3.961750128555272e-09	3.4531424281485136e-09	1.3123824518054085e-09	3.1923689437786124e-09	9.7727524135021e-10	2.4317260054486687e-09	2.446512026445307e-09	1.998459675300566e-09	2.543261447681944e-09	2.4701951632170712e-09	3.5320711519401035e-09	2.1227609752385747e-09	1.445925878470262e-09	2.4851835223954032e-09	3.1649867825765265e-09	1.9383377676656077e-09
TraesCS1A01G013600.1	chr1A	1.9328718784683716e-09	4.960188803801598e-09	5.562652120883447e-09	4.621556726750663	12.000176470045645	22.175118632665146	13.517754462850146	8.597895328687545e-09	7.188085569776395	6.265282369634729e-09	2.381148999383466e-09	5.792142460671901	1.7731401103307072	4.4120537747770046	4.438881101873821e-09	54.38921691524914	13.843261417446081	22.409255527079832	12.816976761352818	3.851476499983762e-09	2.623446354350236e-09	4.509045552609625e-09	5.742461048626872e-09	3.5168643329501755e-09
TraesCS1A01G013700.1	chr1A	0.5708038971982543	7.324063043632775e-10	0.8213641955053036	0.6824049278226001	0.8859546735188494	6.548620355286349e-10	6.653300897564062e-10	1.2695389224815812	1.0613707240957097e-09	1.8502248563256423	1.4063727073260892	8.552500353359148e-10	0.7854493321692797	1.3029407250563274	6.554316039017931e-10	0.535396359170296	1.362702420924727	6.617764230369343e-10	9.462577887160489e-10	5.686972373981329e-10	0.38737006331972146	0.6657918727133668	8.479142308759394e-10	0.5192894289920386
TraesCS1A01G013800.1	chr1A	8.034588766750916e-11	2.0618581959797554e-10	2.3122909873989685e-10	1.9210951402503068e-10	2.494125039820296e-10	1.8435568442635625e-10	1.87302633855506e-10	3.573985114849583e-10	2.987953426141251e-10	2.604361308597386e-10	9.8979933515131e-11	2.4076858493215174e-10	7.370613519081858e-11	1.834008661234466e-10	1.8451602837907357e-10	1.5072390332696243e-10	1.9181287334104024e-10	1.8630221143864908e-10	2.6638893815503463e-10	1.6009871200928143e-10	1.0905178374025873e-10	1.8743263404749402e-10	2.387034213119322e-10	1.4618950680838314e-10
TraesCS1A01G013800.2	chr1A	5.227362003307175e-11	1.3414599679916872e-10	1.5043933671053207e-10	1.2498784981304629e-10	1.6226959267170914e-10	1.1994315177050788e-10	1.2186045854485754e-10	2.3252607609567934e-10	1.943984273606879e-10	1.694416446524696e-10	6.439706605620062e-11	1.56645795945736e-10	4.795374868487671e-11	1.193219400244448e-10	1.2004747271464422e-10	9.806206989733952e-11	1.2479485322228814e-10	1.212095764299227e-10	1.733145844595711e-10	1.0416138874450012e-10	7.094988521076752e-11	1.2194503761713477e-10	1.5530218544464578e-10	9.511195847816668e-11
TraesCS1A01G013800.3	chr1A	5.159680366116017e-11	1.324091320707907e-10	1.4849151281770067e-10	1.233695608368863e-10	1.6016859570776915e-10	1.1839017937705979e-10	1.2028266168709965e-10	2.2951542837129472e-10	1.9188144004991168e-10	1.672477870410805e-10	6.356328051423255e-11	1.546176134854411e-10	4.733286415107315e-11	1.1777701081377026e-10	1.1849314961843478e-10	9.679240435039507e-11	1.2317906308306092e-10	1.1964020691412607e-10	1.710705816876361e-10	1.0281275183780182e-10	7.003125658191965e-11	1.203661456658899e-10	1.5329139947581324e-10	9.388048970631061e-11
TraesCS1A01G013800.4	chr1A	5.159680366116017e-11	1.324091320707907e-10	1.4849151281770067e-10	1.233695608368863e-10	1.6016859570776915e-10	1.1839017937705979e-10	1.2028266168709965e-10	2.2951542837129472e-10	1.9188144004991168e-10	1.672477870410805e-10	6.356328051423255e-11	1.546176134854411e-10	4.733286415107315e-11	1.1777701081377026e-10	1.1849314961843478e-10	9.679240435039507e-11	1.2317906308306092e-10	1.1964020691412607e-10	1.710705816876361e-10	1.0281275183780182e-10	7.003125658191965e-11	1.203661456658899e-10	1.5329139947581324e-10	9.388048970631061e-11
TraesCS1A01G013900.1	chr1A	4.778528552246011e-10	1.2262790985391834	1.3752226560881355e-09	1.14256102530801e-09	1.4833674829723227e-09	1.0964455398710378e-09	1.1139723634559517e-09	2.1256084676399996e-09	1.7770692656583976e-09	1.5489299122561061e-09	5.886778429267784e-10	1.4319582382900366e-09	4.383632836848463e-10	1.0907668092538072e-09	1.097399176925134e-09	8.964223265967011e-10	1.1407967707588885e-09	1.1080224048183163e-09	1.5843339141937105e-09	9.521784981455045e-10	6.485796316454322e-10	1.1147455326214762e-09	1.4196757884836233e-09	8.694542466360907e-10
TraesCS1A01G014000.1	chr1A	1.86045881097532e-09	4.7743604048119125e-09	5.35425305007225e-09	4.44841482764012e-09	5.775301064828842e-09	4.268870099036808e-09	4.337108538988445e-09	8.275783976315964e-09	6.918791290791052e-09	6.0305599753832835e-09	2.2919416881673703e-09	5.575145763486568e-09	1.7067112284098769e-09	4.246760689630817e-09	4.272582962610536e-09	3.4901053695450808e-09	4.441545928804778e-09	4.313943138067853e-09	6.168400916644677e-09	3.7071848731832172e-09	2.525161620613772e-09	4.340118773981597e-09	5.5273256202921475e-09	3.3851086086609752e-09
TraesCS1A01G014100.1	chr1A	7.181081283742336e-10	1.8428287658172788e-09	2.0666582963015248e-09	1.7170188489333942e-09	2.229176273076316e-09	1.6477173797172104e-09	1.6740563548709572e-09	3.1943237372432034e-09	2.670545692885979e-09	2.327702237439376e-09	8.846537995484734e-10	2.1519194437484307e-09	6.587639557933563e-10	1.6391834919932072e-09	1.6491504872367698e-09	1.3471263217265216e-09	1.714367560951344e-09	1.6651148708671248e-09	2.3809066941887687e-09	1.4309156295823987e-09	9.746730615717229e-10	1.6752182587003496e-09	2.1334616131717187e-09	1.3065992071249816e-09
TraesCS1A01G014200.1	chr1A	1.1507650755943601e-09	2.953124884972787e-09	3.311810710115991e-09	2.751515053816616e-09	3.5722450436641853e-09	2.640459758227758e-09	2.682667848536525e-09	5.118889553977967e-09	4.2795375720222726e-09	3.7301324624919776e-09	1.417653771468944e-09	3.44844131894802e-09	1.0556663034906013e-09	2.626784241179845e-09	2.6427563066414544e-09	2.158763927330023e-09	2.7472663766403887e-09	2.668339160266569e-09	3.815392367336369e-09	2.293035919776428e-09	1.5619092377058447e-09	2.684529794245302e-09	3.418862727702986e-09	2.09381940678317e-09
TraesCS1A01G014300.1	chr1A	2.7170842062644614e-10	6.97265597840797e-10	7.819553065551645e-10	6.496632765955898e-10	8.434467464207104e-10	6.234418873593318e-10	6.334076864600129e-10	1.2086267002447979e-09	1.0104463711719256e-09	8.807257203106058e-10	3.3472380715238956e-10	8.142153114182824e-10	2.492545438797253e-10	6.202129458341302e-10	6.2398412795701e-10	5.097081495084777e-10	6.486601167067585e-10	6.300245239518288e-10	9.008565311766427e-10	5.414112588361013e-10	3.6878412556943554e-10	6.338473125301407e-10	8.072314773743161e-10	4.943740266015819e-10
TraesCS1A01G014400.1	chr1A	9.649913414176922e-10	2.4763872353807675e-09	2.7771686223842616e-09	2.307324282796893e-09	2.9955597451354375e-09	2.2141971963613934e-09	2.249591424557535e-09	4.292521733604842e-09	3.588670520036614e-09	3.127958612044842e-09	1.1887948666578141e-09	2.8917422719429585e-09	8.852448374562441e-10	2.202729386101485e-09	2.216123001533417e-09	1.8102639229345434	2.3037614907253486e-09	2.2375758877571677e-09	3.199454586062336e-09	1.922859717480682e-09	1.3097624549371882e-09	2.2511527871025628e-09	2.8669386999123693e-09	1.7558037177957526e-09
TraesCS1A01G014500.1	chr1A	2.5496809139353714e-10	6.543061060307004e-10	7.33777965392998e-10	6.096366292224019e-10	7.914808331341263e-10	5.850307758158659e-10	5.943825683368841e-10	1.1341615480970142e-09	9.481913814788686e-10	8.264629982061609e-10	3.1410101334679213e-10	7.640503870181039e-10	2.338976288539602e-10	5.820007738159136e-10	5.855396082250616e-10	4.783043298705146e-10	6.08695275393072e-10	5.912078471206734e-10	8.453535221468021e-10	5.080541670594694e-10	3.4606282873340397e-10	5.94795108440606e-10	7.574968365882208e-10	4.6391496335124747e-10
TraesCS1A01G014600.1	chr1A	1.8497971558980975e-09	4.747000173265712e-09	5.323569651504501e-09	4.422922479057655e-09	5.742204783655037e-09	4.244406660073847e-09	4.3122540487936695e-09	8.22835828017662e-09	6.8791420570329374e-09	5.996000892429798e-09	2.278807351845495e-09	5.54319650409696e-09	1.6969306483043764e-09	4.2224239521544225e-09	4.248098246492425e-09	3.4701047657081463e-09	4.416092943539422e-09	4.28922140088695e-09	6.133051914257029e-09	3.6859402607294456e-09	2.5106907803810287e-09	4.315247033156489e-09	5.4956504018377516e-09	3.36570970545948e-09
TraesCS1A01G014700.1	chr1A	1.992528417927272e-09	5.113281050832511e-09	5.734338914737874e-09	4.764197361700992e-09	6.185276140418543e-09	4.571907173968433e-09	4.644989700706762e-09	8.86326246846185e-09	7.409940055260787e-09	6.458655282277776e-09	2.454641252450857e-09	5.970912283734072e-09	1.8278666551179856e-09	4.548228269450288e-09	4.575883605018074e-09	3.73785976306217e-09	4.756840855849563e-09	4.620179842313412e-09	6.606281228628713e-09	3.970349231464743e-09	2.7044169208425277e-09	4.648213625221032e-09	5.919697500744985e-09	3.6254095284116e-09
TraesCS1A01G014800.1	chr1A	1.8340318392285114e-09	4.70654278542538e-09	5.27819831924736e-09	4.385227117020231e-09	5.693265538339795e-09	4.208232739675489e-09	4.275501883605087e-09	8.158230226652385e-09	6.820513005410497e-09	5.944898612096589e-09	2.2593856982786296e-09	5.495953352073406e-09	1.6824681711881457e-09	4.186437384380379e-09	4.2118928637098185e-09	3.4405300091822246e-09	4.3784557877706195e-09	4.252665536674844e-09	6.080781585442338e-09	3.6545259971436826e-09	2.48929284759369e-09	4.27846935957845e-09	5.4488124722766334e-09	3.3370246795606772e-09
TraesCS1A01G014900.1	chr1A	2.435228998145741e-10	6.249351416332455e-10	2.1025188332641034	2.3290832826511076	0.7559522714068794	1.117538985368858	5.677014949185178e-10	1.0832504876097082	9.056282828760826e-10	7.89364131066767e-10	0.3000014208183257	0.729753142913774	2.2339826339427663e-10	5.558755033202163e-10	5.592554839780672e-10	1.8273354410183473	0.5813717234388814	0.5646692834426569	8.074066835442107e-10	4.85248265180904e-10	3.305285108838094e-10	0.56809551719262	7.234937722524991e-10	0.8861808282102412
TraesCS1A01G015000.1	chr1A	2.571004410228738e-10	6.597782001074207e-10	7.399146986758547e-10	6.147351434452894e-10	7.981001471507797e-10	5.899235063185076e-10	5.993535097686144e-10	1.14364677012411e-09	9.561212974530048e-10	8.333748751326163e-10	3.1672790354204606e-10	7.704402946753641e-10	2.358537619507078e-10	5.868681638000372e-10	5.904365941958806e-10	0.4823044860387135	6.137859168838145e-10	5.961522377178596e-10	8.524233843391888e-10	5.123031266406119e-10	3.489570220441971e-10	5.997695000285204e-10	7.638319355799981e-10	4.677947778595613e-10
TraesCS1A01G015100.1	chr1A	105.27639366181448	51.353329369892954	60.09463531382699	10.401616883422113	35.11102844399856	7.985433556528822	40.56540870900915	34.8319047990653	25.8848579860334	25.381992998941506	91.10622654082466	41.71591547279245	108.54867424758913	85.39880896422511	77.92569438610641	34.27546877235319	31.156666524218444	32.278992323517066	31.73151792583985	31.20630285604955	33.06532386355747	64.94970197816399	28.433695275704995	85.48539772272774
TraesCS1A01G015200.1	chr1A	1.3068405008267937e-10	3.3536499199792177e-10	3.7609834177633017e-10	3.124696245326157e-10	4.056739816792728e-10	2.998578794262697e-10	3.0465114636214386e-10	5.813151902391983e-10	4.859960684017196e-10	4.23604111631174e-10	1.6099266514050155e-10	3.9161448986433995e-10	1.1988437171219178e-10	2.9830485006111204e-10	3.001186817866105e-10	2.451551747433488e-10	3.1198713305572033e-10	3.030239410748067e-10	4.332864611489277e-10	2.604034718612503e-10	1.7737471302691881e-10	3.048625940428369e-10	3.8825546361161443e-10	2.377798961954167e-10
TraesCS1A01G015200.2	chr1A	1.3068405008267937e-10	3.3536499199792177e-10	3.7609834177633017e-10	3.124696245326157e-10	4.056739816792728e-10	2.998578794262697e-10	3.0465114636214386e-10	5.813151902391983e-10	4.859960684017196e-10	4.23604111631174e-10	1.6099266514050155e-10	3.9161448986433995e-10	1.1988437171219178e-10	2.9830485006111204e-10	3.001186817866105e-10	2.451551747433488e-10	3.1198713305572033e-10	3.030239410748067e-10	4.332864611489277e-10	2.604034718612503e-10	1.7737471302691881e-10	3.048625940428369e-10	3.8825546361161443e-10	2.377798961954167e-10
TraesCS1A01G015300.1	chr1A	2.000386276658697	4.666769184421785e-10	2.6167969137276845	1.7392675443121368	1.693546031124184	1.6690680842096863	1.6957483531326587	5.662501206012163	4.0577249210782504	1.178932007044677	1.3441753790309208	2.1798034708884315	1.5014251174412039	0.4151059044438083	4.1762994028897356e-10	1.0234365326499986	4.3414547529443897e-10	1.26501825583819	2.411757880124858	1.4494570719055488	1.4809539422518603	0.8484626565209155	5.402766169694015e-10	2.3161771300315896
TraesCS1A01G015400.1	chr1A	0.7082602388713392	0.9087784213529547	1.0191584247806205e-09	31.329236409004437	16.48954582799679	34.12754406190001	0.8255494594262025	1.5752589357002962e-09	7.901768222615354	1.147890461578716e-09	4.36260979590827e-10	1.0612043773614037e-09	0.9745948378315472	8.083521444332932e-10	8.132673000690379e-10	0.6643261461564507	0.8454286554231896	0.8211400276502927	2.3482557533142296	0.7056462711360227	4.806533638798568e-10	0.8261224443651319	1.052102025320547	6.44340475702336e-10
TraesCS1A01G015500.1	chr1A	4.954560302443869e-10	1.2714528476360196e-09	1.4258831990599163e-09	1.1846507637690877e-09	1.5380118722145877e-09	1.136836473035896e-09	1.1550089509048279e-09	2.2039117726643433e-09	1.8425330605560205e-09	1.6059894945955483e-09	6.103635961581563e-10	1.4847088103836063e-09	4.5451173926187816e-10	1.1309485489653826e-09	1.1378252402347322e-09	1.8588895837876844	2.365643036171706	3.446519423043419	1.6426977114932484e-09	0.9872549134926859	6.724720509232378e-10	1.1558106021271023e-09	1.4719738988805641e-09	9.014832595589858e-10
TraesCS1A01G015600.1	chr1A	3.8404473968378113e-10	9.855461394822924e-10	1.1052503321683943e-09	9.182629061220236e-10	1.192165062162765e-09	8.812004309136065e-10	8.95286533628192e-10	1.7083266149801544e-09	1.428209742953299e-09	1.2448568182379534e-09	0.4731134839913037	1.1508480546875904e-09	3.523074338240496e-10	8.766365016668016e-10	0.881966858720073	7.204441185200138e-10	9.168449954165724e-10	0.8905046224904722	1.2733105996881041e-09	7.652547001752388e-10	5.212558491094461e-10	8.959079206255887e-10	1.14097679485982	6.987701887003918e-10
TraesCS1A01G015700.1	chr1A	4.3298404252745547e-10	1.111135520100425e-09	1.246093768192536e-09	1.0352782999269761e-09	1.3440841512378324e-09	9.934929070192972e-10	1.0093740194694773e-09	1.9260208180963376e-09	1.6102083017468111e-09	1.4034904838752512e-09	5.334029280979729e-10	1.2975020656806434e-09	3.97202411977349e-10	9.883473905445294e-10	9.943570006880322e-10	8.122512161181376e-10	1.0336797030819974e-09	1.0039827423940612e-09	1.4355701663820946e-09	8.627720663947529e-10	5.876801357162836e-10	1.0100745905912908e-09	1.286372897546194e-09	7.878153502383357e-10
TraesCS1A01G015800.1	chr1A	3.777526081968614e-10	9.693990991630976e-10	1.0871420762873442e-09	9.032182242194977e-10	1.1726328083648964e-09	8.667629750531142e-10	8.806182931708547e-10	1.6803376476194498e-09	1.4048101684637186e-09	1.224461270601521e-09	4.6536206307435795e-10	1.1319927325511056e-09	3.4653528160223953e-10	8.622738205394345e-10	8.675168449536899e-10	7.08640470001254e-10	9.018235443506484e-10	8.759147272729931e-10	1.2524488695586326e-09	7.5271688179905e-10	5.127156713592621e-10	8.812294994567668e-10	1.1222832008434028e-09	6.87321642601146e-10
TraesCS1A01G015900.1	chr1A	9.558395628154345	5.303571222654891	6.691209394651286	9.265305794081803	5.613527926559938	7.113075267655288	9.635704925957915	16.087938599365604	23.057100388999082	2.51213002659728	0.6364976119981829	0.7741398887012464	1.1849315653794978	1.769058775261827	0.5932718245331902	12.115511837540872	12.951398633349996	12.579313184712841	6.85213323199122	4.118105325827533	6.66202103464699	6.026495456469045e-10	0.7674997967824558	0.9400821831073828
TraesCS1A01G016000.1	chr1A	0.4642784665452899	0.5957220647703835	0.668078320831714	5.550521198098245e-10	7.206146959710924e-10	5.326493794914679e-10	5.411638486260305e-10	1.0326131031217693e-09	8.632939870206742e-10	7.52464693080906e-10	2.8597762164476006e-10	6.956402660661055e-10	2.1295533846034784e-10	5.298906721689657e-10	5.331126530118145e-10	4.354788073470489e-10	5.541950511669393e-10	5.382733796869995e-10	7.696638324615976e-10	4.625649590056011e-10	3.1507769951563426e-10	5.41539451482062e-10	6.896734952324256e-10	4.223778091353321e-10
TraesCS1A01G016100.1	chr1A	0.25227792421024436	6.474025246071643e-10	7.260358766608327e-10	6.032043552915675e-10	7.831299216473653e-10	5.788581181577852e-10	5.881112399488044e-10	1.1221950135918873e-09	9.38187017547673e-10	8.17742990018757e-10	3.10786934659663e-10	7.559888940718402e-10	2.314297757945398e-10	5.75860085698278e-10	5.793615818780211e-10	4.732577425682465e-10	6.022729336831802e-10	5.849700152049806e-10	8.364342001077385e-10	5.026936893296508e-10	3.4241152104454037e-10	5.885194273433428e-10	7.49504490129494e-10	4.5902019820451674e-10
TraesCS1A01G016200.1	chr1A	2.0124040131185662e-10	5.164286348097673e-10	5.79153930291481e-10	4.811720527403745e-10	0.6246974661781912	0.46175122376779	4.691323762559197e-10	8.951674064157231e-10	0.7483854676762207	0.6523080777900886	2.4791264519765514e-10	6.030472506015709e-10	1.8460997389595616e-10	4.593597129993433e-10	4.621528329257656e-10	3.775145147232366e-10	4.804290639947812e-10	0.46662664289478917	6.672179295747204e-10	4.0099537125766103e-10	2.731393648232478e-10	4.694579845921492e-10	5.978746852373364e-10	3.661573214480544e-10
TraesCS1A01G016300.1	chr1A	1.30525517066e-10	3.349581602243699e-10	3.7564209631521855e-10	3.120905671635911e-10	4.0518185796514516e-10	2.994941213841028e-10	3.0428157360068554e-10	5.806099959121794e-10	4.854065058440144e-10	4.2309023684957533e-10	1.6079736469754906e-10	3.9113942174076816e-10	1.1973893980150168e-10	2.9794297600119157e-10	2.997546073647101e-10	0.24485777687893445	3.1160866099782823e-10	3.026563422785171e-10	4.327608406946428e-10	2.6008757601993053e-10	1.7715953949716516e-10	3.044927647738808e-10	3.8778447032781544e-10	2.3749144504758563e-10
TraesCS1A01G016400.1	chr1A	2.2723660943626758e-10	5.831408167792093e-10	6.539689575413837e-10	5.433297941538618e-10	7.05395800596835e-10	5.214001845708455e-10	5.297348338715208e-10	1.0108050122427454e-09	8.450618014447361e-10	7.365731472925024e-10	2.799379675445539e-10	6.809488137732627e-10	2.0845786563119583e-10	5.186997392826095e-10	5.218536740675312e-10	4.262817892404587e-10	5.424908262214918e-10	5.269054096830502e-10	7.534090524729683e-10	4.5279589968130113e-10	3.084234714371626e-10	5.301025042490724e-10	6.751080571071366e-10	4.1345747525707797e-10
TraesCS1A01G016500.1	chr1A	4.4339231278051925e-10	1.1378455085643774e-09	1.2760479453125487e-09	1.0601647975213745e-09	1.3763938664118186e-09	1.017374948053415e-09	1.0336378180144168e-09	1.972319395454423e-09	1.648915232077263e-09	1.437228235891483e-09	5.462251138695588e-10	1.328692019182582e-09	4.067505468806506e-10	1.0121057412787728e-09	1.0182598132045715e-09	8.317764857363619e-10	1.0585277728676224e-09	1.02811694293238e-09	1.4700790646124334e-09	8.835117795292421e-10	6.018070620556174e-10	1.0343552297881967e-09	1.3172953229679774e-09	8.067532192344495e-10
TraesCS1A01G016600.1	chr1A	2.677640843668337e-10	6.871435339982304e-10	7.706038193177398e-10	6.402322460353054e-10	8.312026003714674e-10	6.143915074101088e-10	6.242126350182459e-10	1.1910813105689092e-09	9.957779253025694e-10	8.679404029274158e-10	3.2986468925511305e-10	8.023955122064867e-10	2.456361660133668e-10	6.112094397768119e-10	6.149258764105583e-10	5.023088192584583e-10	6.392436488159512e-10	6.208785851968252e-10	8.877789788783504e-10	5.335517009517115e-10	3.634305609095723e-10	6.246458791255141e-10	7.955130610706657e-10	4.87197298716449e-10
TraesCS1A01G016700.1	chr1A	1.039580044135968e-09	2.667798809130006e-09	2.9918289989936733e-09	2.485668188713561e-09	3.227100595000979e-09	2.3853428733748346e-09	2.4234728873252668e-09	4.624310853110531e-09	3.866055681005629e-09	3.3697331907536224e-09	1.2806823925830558e-09	3.115258582817777e-09	9.536695591919926e-10	2.3729886623218897e-09	2.3874175330529085e-09	1.950187702467219e-09	2.481830011747598e-09	2.4105286133809103e-09	3.446755423632372e-09	2.071486555546822e-09	1.4110001326134926e-09	2.42515493489793e-09	3.088537826475644e-09	1.8915180148234437e-09
TraesCS1A01G016800.1	chr1A	8.089965005118245e-10	2.0760689980823728e-09	2.328227830043948e-09	1.9343357709161924e-09	2.5113151246812125e-09	1.8562630631150029e-09	1.8859356679561287e-09	3.5986178443378944e-09	3.0085470901058832e-09	2.622311167240601e-09	9.96621260393581e-10	2.4242801753506757e-09	7.421413486945204e-10	1.8466490718068838e-09	1.8578775539171126e-09	1.5176272722207304e-09	1.9313489189163637e-09	1.875862492367851e-09	2.6822495213981237e-09	1.6120214924744064e-09	1.0980339377856877e-09	1.8872446297889907e-09	2.403486203309994e-09	1.4719707859716271e-09
TraesCS1A01G016900.1	chr1A	1.263611680188757e-10	3.2427149353488617e-10	3.63657429707393e-10	3.021334791918421e-10	3.9225474055502205e-10	2.8993891649359413e-10	2.9457362752573703e-10	5.620859345824309e-10	4.699198625767264e-10	4.095917618825601e-10	1.5566720802389462e-10	3.786603209884203e-10	1.1591873091764089e-10	2.8843725960107523e-10	2.9019109180384734e-10	2.370457160368258e-10	3.0166694799280847e-10	2.930002483674976e-10	4.1895383011855606e-10	2.5178961655795194e-10	1.7150735610745328e-10	2.9477808075388814e-10	3.75412407563393e-10	2.2991440344595e-10
TraesCS1A01G016900.2	chr1A	1.245090081790619e-10	3.195184301773835e-10	3.5832706043877933e-10	2.9770490746212563e-10	3.865052014456331e-10	2.8568908859513444e-10	2.9025586557936177e-10	5.538470664959768e-10	4.63031934022082e-10	4.0358810249913195e-10	1.533854900277874e-10	3.731100443451956e-10	1.1421963283668801e-10	2.8420944248831115e-10	2.859375676038295e-10	2.3357117902259267e-10	2.97245214521747e-10	2.8870554848785827e-10	4.1281294466262346e-10	2.480989683692529e-10	1.6899345850587827e-10	2.9045732200031137e-10	3.699097377514706e-10	2.265443948322774e-10
TraesCS1A01G016900.3	chr1A	2.1383875700842533e-10	5.487588805795739e-10	6.154109997930013e-10	5.112951126833791e-10	6.638057202701584e-10	4.906584711380498e-10	4.985017101785329e-10	9.512080290763962e-10	7.952370248110285e-10	6.9314485308314e-10	2.634328472322218e-10	6.408001258462536e-10	1.9616720644525585e-10	4.881172438893321e-10	4.910852229300616e-10	4.0114824883476087e-10	5.105056102336067e-10	4.95839108615285e-10	7.089881146325614e-10	4.2609908943179086e-10	2.902388480798208e-10	4.988477027398525e-10	6.353037397288424e-10	3.8908005538435195e-10
TraesCS1A01G017000.1	chr1A	0.17401056820862945	0.4465506906001177	5.007886275943588e-10	4.160646752536716e-10	5.401696683276571e-10	0.3992716781258949	4.0565408706980885e-10	7.740423287821132e-10	6.471214495699447e-10	0.5640442893667396	0.6431027757890934	0.5214489438987641	1.596304033041044e-10	3.972037626150656e-10	3.9961894555953e-10	3.264330359116289e-10	4.154222202952179e-10	4.034874040187454e-10	5.769366895082758e-10	3.467366983812875e-10	2.361808847312612e-10	4.059356373508395e-10	0.5169762782100693	0.3166125844690003
TraesCS1A01G017100.1	chr1A	1.4346204609076356e-09	3.6815623565994076e-09	4.128724018611268e-09	3.4302221004247142e-09	4.453398821101351e-09	3.291773165257272e-09	3.3443925845088682e-09	6.381548977292533e-09	5.335156839787767e-09	4.650231803239998e-09	1.767341701764617e-09	4.299056844288531e-09	1.3160639916849496e-09	3.2747243540042074e-09	3.294636195613014e-09	2.691259029404762e-09	3.4249254162116852e-09	3.3265294864656563e-09	4.756522484612673e-09	2.8586514466546143e-09	1.94718018300662e-09	3.346713810159143e-09	4.262182200536389e-09	2.610294860456352e-09
TraesCS1A01G017200.1	chr1A	2.586455157886363e-10	6.637432133292202e-10	7.443613014323201e-10	6.184294652208019e-10	8.028964220735609e-10	5.934687196978254e-10	6.029553938417432e-10	1.1505196473484134e-09	9.618672187117368e-10	8.383831376033652e-10	3.1863131642390936e-10	7.750703445231727e-10	2.372711523470462e-10	5.903950157459509e-10	5.93984891036e-10	4.852029500128778e-10	6.174745341727798e-10	5.997348833772217e-10	8.575461210239195e-10	5.153818713920579e-10	3.510541195324435e-10	6.033738840431148e-10	7.684222717313201e-10	4.706060445534289e-10
TraesCS1A01G017300.1	chr1A	8.244945177630089e-10	2.1158404348272458e-09	2.372829895753603e-09	1.9713920117383418e-09	2.5594246098283624e-09	1.8918236581938345e-09	1.922064703740729e-09	3.667556883501456e-09	3.06618209183205e-09	2.6725470133563213e-09	1.0157136217038028e-09	2.4707223243037536e-09	7.563586159108906e-10	1.8820254908070155e-09	1.8934690779385134e-09	1.5467005916119322e-09	1.968347940351543e-09	1.9117985554400326e-09	2.733633611846364e-09	1.6429031302612727e-09	1.1190690706934596e-09	1.9233987414707718e-09	2.44953000030827e-09	1.5001694600323863e-09
TraesCS1A01G017400.1	chr1A	8.244945177630089e-10	2.1158404348272458e-09	2.372829895753603e-09	1.9713920117383418e-09	2.5594246098283624e-09	1.8918236581938345e-09	1.922064703740729e-09	3.667556883501456e-09	3.06618209183205e-09	2.6725470133563213e-09	1.0157136217038028e-09	2.4707223243037536e-09	7.563586159108906e-10	1.8820254908070155e-09	1.8934690779385134e-09	1.5467005916119322e-09	1.968347940351543e-09	1.9117985554400326e-09	2.733633611846364e-09	1.6429031302612727e-09	1.1190690706934596e-09	1.9233987414707718e-09	2.44953000030827e-09	1.5001694600323863e-09
TraesCS1A01G017500.1	chr1A	4.219471943845987e-10	1.0828124578233552e-09	1.2143305937091966e-09	1.0088888530660925e-09	1.3098231826768678e-09	9.681685780168447e-10	9.83644877796726e-10	1.8769261697919212e-09	1.5691637764081666e-09	1.3677152362470584e-09	5.198063828719462e-10	1.2644284836142739e-09	3.8707764461322045e-10	9.631542217659432e-10	9.690106457685333e-10	7.915467733543418e-10	1.0073310047681426e-09	9.783910254310753e-10	1.3989772013566684e-09	8.407798372513571e-10	5.727000538254764e-10	9.843275912232774e-10	1.2535830001577616e-09	7.677337824871623e-10
TraesCS1A01G017600.1	chr1A	3.941265002493505e-10	1.011418229835002e-09	1.1342648402778212e-09	9.423687089078885e-10	1.2234612145882834e-09	9.043332871585913e-10	9.187891715683705e-10	1.7531727959594871e-09	1.4657024285131229e-09	1.2775362096813185e-09	4.85533434550719e-10	1.1810595726067396e-09	3.6155604167168945e-10	8.996495478033537e-10	9.051198339596191e-10	7.393568762100995e-10	9.409135758823311e-10	9.138817270510044e-10	1.306736946322163e-09	7.85343804025993e-10	5.349396107161044e-10	9.194268709228417e-10	1.1709291759715356e-09	7.17113972652844e-10
TraesCS1A01G017700.1	chr1A	1.7471697088185005e-10	4.4836348050601723e-10	5.028215990189637e-10	4.177537064116702e-10	5.423625086591631e-10	4.008925370408044e-10	4.073008560294968e-10	7.771845845146521e-10	6.497484649267916e-10	5.663340491090662e-10	2.1523782565468947e-10	5.235657861785763e-10	1.6027842929857302e-10	3.9881622714530265e-10	4.0124121462134126e-10	3.277582038517302e-10	4.171086433816666e-10	4.0512537724209616e-10	5.792787870299601e-10	3.481442898496824e-10	2.3713967046088735e-10	4.075835492751324e-10	5.190749635294655e-10	3.1789788557655166e-10
TraesCS1A01G017800.1	chr1A	2.1001275452454002e-10	5.38940488116374e-10	0.6044000683906952	5.021470218578794e-10	6.519289100506206e-10	4.818796110493729e-10	4.895825188773555e-10	9.341890174956539e-10	7.81008646032692e-10	6.807431071756666e-10	2.587195074151196e-10	6.293349316622769e-10	1.9265738329805704e-10	4.793838514319757e-10	4.822987273994327e-10	3.9397090541058654e-10	5.013716451838836e-10	4.869675565743479e-10	6.963029011306776e-10	4.184753256325883e-10	2.850458953653152e-10	4.899223209406683e-10	6.239368868709744e-10	3.821186360459852e-10
TraesCS1A01G017900.1	chr1A	2.4858652576374123e-10	6.379295573622386e-10	7.154123251347982e-10	5.943781075052451e-10	7.716709547537958e-10	0.5703881116084214	5.795058386711554e-10	1.1057747554030187e-09	9.244592136713496e-10	8.057775554324217e-10	3.0623941694034563e-10	7.449270619675931e-10	1.3682605999775095	1.1348678937533356	0.5708842085130698	12.590988528486301	5.934603147668001	12.104622121138773	1.6483905422764116	1.9813525626741237	1.6870063198464094	2.3196322140132764	0.738537540300099	2.2615184586836445
TraesCS1A01G018000.1	chr1A	1.149996361592756	1.4755760951983161	0.8273996033418097	1.0311288882469303	0.8924646940537174	0.32983699083657764	3.351094774056982e-10	0.6394337658992065	0.5345848542207339	1.8638203624859946	0.7083533876578968	2.1538360947636987	0.26374027902664965	3.281286927859927e-10	3.301238672958931e-10	0.5393304670842468	0.3431788997631874	3.3331958782221e-10	4.766054593800273e-10	2.8643802070687517e-10	0.390216469735513	3.353420651462067e-10	0.854144729993483	2.615525912280914e-10
TraesCS1A01G018100.1	chr1A	1.1629962302439849e-10	2.9845128093491867e-10	3.3470110040984885e-10	0.2780760127426989	3.610213420096573e-10	2.668524453910597e-10	0.2711181164716209	5.17329677496242e-10	4.3250235595469195e-10	0.37697789831572753	1.4327216101496622e-10	3.4850938208067724e-10	0.42675467224376473	0.7964110753700786	0.26708454143549676	2.3998796967689855	3.609406176613146	0.26967001808799923	0.7711890178871988	0.4634815894929825	1.5785103268611096	1.6278377389543701	2.4186405933359048	0.8464296072772594
TraesCS1A01G018200.1	chr1A	7.133471905065592e-10	1.8306111165411422e-09	2.0529566943370947e-09	1.7056352985537254e-09	2.21439720386255e-09	1.6367932865920135e-09	1.662957638706067e-09	3.1731459003112043e-09	2.6528404175740277e-09	2.312269957412154e-09	8.787886914851686e-10	2.1376525745081096e-09	6.543964599538424e-10	1.628315977129164e-09	1.6382168928462499e-09	1.3381950974940806e-09	1.703001588171556e-09	1.6540754352591662e-09	2.365121677431716e-09	1.421428896126604e-09	9.682111407215236e-10	1.6641118393056512e-09	2.119317116288812e-09	1.2979366709451473e-09
TraesCS1A01G018300.1	chr1A	1.1507650755943601e-09	2.953124884972787e-09	3.311810710115991e-09	2.751515053816616e-09	3.5722450436641853e-09	2.640459758227758e-09	2.682667848536525e-09	5.118889553977967e-09	4.2795375720222726e-09	3.7301324624919776e-09	1.4176537728865979	3.44844131894802e-09	2.111332608036869	2.626784241179845e-09	2.6427563066414544e-09	2.158763927330023e-09	2.7472663766403887e-09	5.336678323201477	3.815392367336369e-09	2.293035922069465	1.5619092377058447e-09	2.684529794245302e-09	3.418862727702986e-09	2.09381940678317e-09
TraesCS1A01G018400.1	chr1A	2.7170842062644614e-10	6.97265597840797e-10	7.819553065551645e-10	6.496632765955898e-10	8.434467464207104e-10	6.234418873593318e-10	6.334076864600129e-10	1.2086267002447979e-09	1.0104463711719256e-09	8.807257203106058e-10	3.3472380715238956e-10	8.142153114182824e-10	2.492545438797253e-10	6.202129458341302e-10	6.2398412795701e-10	5.097081495084777e-10	6.486601167067585e-10	6.300245239518288e-10	9.008565311766427e-10	5.414112588361013e-10	3.6878412556943554e-10	6.338473125301407e-10	8.072314773743161e-10	4.943740266015819e-10
TraesCS1A01G018400.2	chr1A	2.3306108570701665e-10	5.980877474619977e-10	6.707313387635635e-10	5.57256297902932e-10	7.234763427781979e-10	5.347645936338528e-10	5.433128747397079e-10	1.0367137327731552e-09	0.8667222311571537	7.554528200209384e-10	2.871132728498475e-10	6.98402736436765e-10	2.1380100947950446e-10	5.319949311559182e-10	5.3522970686854e-10	4.372081455711708e-10	5.563958257383604e-10	5.40410927404168e-10	7.727202592331058e-10	4.644018595648291e-10	3.163289105967433e-10	5.436899691594276e-10	6.924122708452618e-10	4.2405512173478645e-10
TraesCS1A01G018500.1	chr1A	0.7237435063045169	6.190968088451919e-10	6.942921555960654e-10	5.768310706992233e-10	0.7488899370327493	5.535492990903483e-10	5.623978561393837e-10	1.0731304334012106e-09	0.8971676309063212	7.819896530112105e-10	0.8915961502905593	1.4458711366944146	0.8852448376775552	5.506823465253712e-10	5.540307503833543e-10	2.2628299018579154	4.607522982026637	1.118787944437978	1.5997272938310318	0.9614298592210562	0.32744061406173763	0.5627881973384289	0.716734675694827	1.7558037182347033
TraesCS1A01G018600.1	chr1A	2.1884040929099525e-10	5.615942577863503e-10	6.298053587712104e-10	5.232542187088547e-10	6.793320235578331e-10	5.021348896155161e-10	5.101615806877935e-10	9.73456623654793e-10	8.13837484035422e-10	7.09357393714576e-10	2.695944968793483e-10	6.557883321796065e-10	2.0075552415533127e-10	4.995342234921672e-10	5.025716230596122e-10	4.105310383837773e-10	5.22446249930596e-10	5.074367013252695e-10	7.2557122646634e-10	4.3606547491341573e-10	2.9702748554338267e-10	5.105156659564794e-10	6.501633865225001e-10	3.981805719340198e-10
TraesCS1A01G018600.2	chr1A	2.213161492658334e-10	5.679475695816707e-10	6.369303422609088e-10	5.291737899181082e-10	6.870173018497113e-10	5.078155380067783e-10	5.159330349773709e-10	9.844693314301131e-10	8.230444216333545e-10	7.173823488028795e-10	2.726444174816859e-10	6.63207260860418e-10	2.0302666995482596e-10	5.051854505662988e-10	5.082572122131834e-10	4.151753730655273e-10	5.283566805948777e-10	5.131773290742356e-10	7.337796085278379e-10	4.4099868049179857e-10	3.0038775534898146e-10	5.162911260101524e-10	6.575186802335877e-10	4.026851858777369e-10
TraesCS1A01G018700.1	chr1A	4.495676931813622e-10	1.1536929390457754e-09	1.2938202008182945e-09	1.074930323949249e-09	1.3955636988159037	1.0315445155750505e-09	1.0480338889512308	1.9997890249175767e-09	1.6718806252816819e-09	1.4572453422409467e-09	5.538327059847338e-10	1.3471974790597767e-09	4.124155962801026e-10	1.0262019215194244e-09	1.0324417047533817e-09	8.43361116456924e-10	1.0732704995092328e-09	1.0424361204105468e-09	1.4905537033953363e-09	0.8958169584129316	6.101887760118237e-10	1.0487612914844113e-09	1.3356420544856375e-09	8.179893364939823e-10
TraesCS1A01G018800.1	chr1A	2.551696471970103e-10	6.548233440591832e-10	7.343580270257196e-10	6.101185554115104e-10	7.921065096820584e-10	5.854932507374594e-10	5.948524359798382e-10	1.1350581184907667e-09	9.489409398831995e-10	8.271163286395254e-10	3.1434931454311367e-10	7.646543794189087e-10	2.3408252816530723e-10	5.824608534790092e-10	5.860024853857139e-10	4.786824360601356e-10	6.091764574289558e-10	5.916752051025871e-10	8.460217858006731e-10	5.084557909069472e-10	3.4633639618694817e-10	5.952653022022191e-10	7.58095648316749e-10	4.642816945475725e-10
TraesCS1A01G018800.2	chr1A	2.548674328497576e-10	6.540477933161207e-10	7.334882780793806e-10	6.093959515164317e-10	7.911683653752893e-10	5.847998122249397e-10	5.941479127631231e-10	1.1337137938340466e-09	9.47817046152584e-10	8.261367198807736e-10	3.139770097884239e-10	7.637487484918434e-10	2.338052886925493e-10	5.817710064358048e-10	5.853084437528054e-10	4.781155006838306e-10	6.084549693230391e-10	5.909744448912537e-10	8.450197860543636e-10	5.078535929706184e-10	3.45926207008677e-10	5.945602900006374e-10	7.571977853301916e-10	4.637318149251317e-10
TraesCS1A01G018900.1	chr1A	0.5258587083548432	4.4982434441209164e-10	0.5044598996016826	0.8382296747015593	0.5441296420037028	4.0219873048215375e-10	0.4086279295503577	7.797168177522779e-10	1.3037309688324223	0.5681792868722791	1.5115738151924645	5.252716752456799e-10	2.2512091089349475	0.40011565592601667	2.0127427210458504	0.3288261103565598	1.255403017493074	0.8128907247667742	0.5811662015248814	3.492786182445225e-10	1.1895616108175742	1.2267346307957818	5.207662205379786e-10	2.551469318169292
TraesCS1A01G019000.1	chr1A	21.761096879226194	10.424199032913695	15.030411034880538	8.325033412960474	22.517185051413136	12.649285646935267	14.204274123646641	15.487804260787131	17.264327752302354	8.464466878748135	13.225276105697157	13.04208256219423	18.631917185918265	7.947645623863527	10.66129465613316	9.797392422197591	11.082904718321505	9.418937423024976	10.581926427403669	16.188318305229	14.177222007003804	4.738044271239246	10.344172532500892	13.198120081487009
TraesCS1A01G019100.1	chr1A	2.2177231446528204e-10	5.691181932221689e-10	6.382431495620305e-10	5.302644950845488e-10	6.884333457559628e-10	5.088622206684207e-10	5.169964489965615e-10	9.864984678054413e-10	8.247408374800739e-10	7.188609795458603e-10	2.732063778062788e-10	6.645742287632564e-10	2.034451378420568e-10	5.062267122301248e-10	5.093048052304555e-10	4.1603111069465583e-10	5.294457015785841e-10	5.14235063177446e-10	7.352920364396094e-10	4.419076437631661e-10	3.010068987815111e-10	5.173552781077342e-10	6.588739231334164e-10	4.03515179390367e-10
TraesCS1A01G019200.1	chr1A	1.6292219749396362	1.0452385250009064	1.1721929390378995e-09	9.738800916032313e-10	1.2643719050445478e-09	0.9345728238782778	0.9495120911886229	1.8117962396098676e-09	1.5147132983624577e-09	1.32025508741363	4.01415149977787	1.2205524175800724	6.351980780430343	9.29732466529499	3.7415426836504793	2.2922395526230255	1.9447526032376865	1.8888810973602705	9.453025759413473	3.2464180474856144	3.316963088324356	7.601368907305323	6.050416374211267	8.152024959264086
TraesCS1A01G019300.1	chr1A	5.144057429549292e-10	1.320082119896202e-09	1.4804189708167897e-09	1.2299601156901366e-09	1.5968362306737911e-09	1.1803170712077868e-09	1.1991845920549726e-09	2.2882048125750117e-09	1.9130044445454148e-09	1.6674137939904378e-09	6.337081799155997e-10	1.541494485999872e-09	4.718954551858385e-10	1.174203951634975e-09	1.181343655797495e-09	9.649932774758113e-10	1.2280609062113613e-09	1.19277949713908e-09	1.7055259904985681e-09	1.0250144629438857e-09	6.981920974924134e-10	1.200016904041127e-09	1.5282725021843628e-09	9.359623005620387e-10
TraesCS1A01G019400.1	chr1A	3.149166865407005e-10	8.081478343754799e-10	9.063052723780833e-10	7.529755830200592e-10	9.775753509734673e-10	7.225843533491571e-10	7.341349575751174e-10	1.4008278242837267e-09	1.171131989221705e-09	1.0207825909551217e-09	3.879530564849159e-10	9.43695404843824e-10	2.8889209573572065e-10	7.188419313667773e-10	7.232128234272469e-10	5.907641771864113e-10	7.518128962415894e-10	7.302137897119734e-10	1.0441146917442452e-09	6.275088541436958e-10	4.2742979626974577e-10	7.346444949129827e-10	9.356009708494511e-10	5.729915547343212e-10
TraesCS1A01G019500.1	chr1A	0.4332746362778626	2.2237624983866913	1.246930072734947e-09	1.0359731175779338e-09	4.034958664758961	0.9941596817765572	1.0100514527073605	1.9273134514451924	1.6112889784593928e-09	1.404432423797315e-09	5.337609166403205e-10	1.2983728737345066	3.974689907773338e-10	9.89010710940868e-10	9.95024354379769e-10	8.127963511625121e-10	1.0343734478491667e-09	1.0046565563151311e-09	1.436533636292418e-09	8.633511080500514e-10	5.880745519147509e-10	1.0107524930010834e-09	1.2872362350613256e-09	7.883440853727238e-10
TraesCS1A01G019600.1	chr1A	0.3985056839839601	3.0679686315221626	1.1468677829475746e-09	4.764197362653831	1.237055229320764	9.143814347936867e-10	2.7869938213530547	1.77265249369237e-09	1.4819880125341454	1.2917310564555553e-09	4.909282504901713e-10	1.1941824567468144e-09	3.655733310235971e-10	9.096456538900577e-10	9.151767210036149e-10	7.47571952612434e-10	9.513681711699125e-10	9.240359684626823e-10	1.3212562457257426e-09	7.940698462929484e-10	5.408833841685054e-10	9.296427250442063e-10	1.1839395001489971e-09	7.2508190568232e-10
TraesCS1A01G019700.1	chr1A	2.5979042551647324e-10	6.66681312060255e-10	7.476562609155215e-10	6.211669799561857e-10	8.064504907426994e-10	5.960957442115784e-10	6.056244116816863e-10	1.1556124908578027e-09	9.661249810480867e-10	8.420942903251507e-10	3.2004175685878374e-10	7.785012394083859e-10	2.3832144718640936e-10	5.930084343267177e-10	5.966142004128193e-10	4.873507296708824e-10	6.202078218491985e-10	6.023896454364368e-10	8.613420998292567e-10	5.176632398368517e-10	3.5260808142977017e-10	6.060447543547744e-10	7.718237385277164e-10	4.726892101430014e-10
TraesCS1A01G019800.1	chr1A	2.9238188741324096e-10	7.503184150678141e-10	8.414519059669706e-10	6.990941780756891e-10	9.076220423440254e-10	6.708776831366723e-10	6.816017495602313e-10	1.3005874274373369e-09	1.0873281602828328e-09	9.477374598994563e-10	3.601919229139844e-10	8.761664764174997e-10	2.6821956352274787e-10	6.674030612780314e-10	6.714611811711305e-10	5.484902913189053e-10	6.980146908040119e-10	6.77961172513381e-10	9.693999628966047e-10	5.826055937475437e-10	3.9684378729754477e-10	6.820748254400428e-10	8.68651263696275e-10	5.319894416690934e-10
TraesCS1A01G019900.1	chr1A	1.662578437827546e-10	4.2665543663912785e-10	4.784769014615171e-10	3.975276706647235e-10	5.161033915775452e-10	3.8148285458814637e-10	3.875809072956453e-10	7.395562811696214e-10	6.182901308020848e-10	5.389143217764613e-10	2.048168338382894e-10	4.982167344655779e-10	1.525183611275373e-10	3.7950707167187573e-10	3.818146505346011e-10	3.118894059315331e-10	3.969138391180166e-10	3.855107568657083e-10	5.512323250259344e-10	3.312884756617503e-10	2.256582751359719e-10	3.8784991361617677e-10	4.939433402630377e-10	3.025064865324127e-10
TraesCS1A01G020000.1	chr1A	6.310647188743265e-10	1.619455582081851e-09	1.8161542603861886e-09	1.5088953520929828e-09	1.9589730884610046e-09	1.4479940609636093e-09	1.4711404330684172e-09	2.8071329812137242e-09	2.3468431846573753e-09	2.0455565116891492e-09	7.774230359668403e-10	1.8910807232940755e-09	5.789137793335555e-10	1.4404945838728187e-09	1.4492534584807976e-09	1.1838382827293677e-09	1.506565432351181e-09	1.4632827653074733e-09	2.092311943378009e-09	1.2574713108451383e-09	8.565308722903019e-10	1.4721615000700044e-09	1.8748602055145405e-09	1.1482235456552869e-09
TraesCS1A01G020100.1	chr1A	5.623512259655367e-10	1.4431211328133568e-09	1.6184022721037204e-09	1.3445992553929629e-09	1.7456702695954772e-09	1.2903292024092094e-09	1.3109552813841383e-09	2.501478257649512e-09	2.0913071236101875e-09	1.822826055277003e-09	6.927733151516355e-10	1.685170365792543e-09	5.158787423852155e-10	1.2836463060121024e-09	1.291451470405798e-09	1.05493603069002e-09	1.3425230290028382e-09	1.3039531959142382e-09	1.8644905209718668e-09	1.1205515252565996e-09	7.632674933388318e-10	1.311865169487469e-09	1.6707160193740202e-09	1.0231992048827164e-09
TraesCS1A01G020100.2	chr1A	6.540822770095603e-10	1.6785238707900036e-09	1.882396968971703e-09	1.5639310488258576e-09	2.0304249944231082e-09	1.5008084340078747e-09	1.524799050687934e-09	2.909520810315744e-09	2.4324423281707146e-09	2.120166475641337e-09	8.057788913820443e-10	1.9600563119856527e-09	6.000291755402506e-10	1.4930354197587572e-09	1.5021137669968146e-09	1.2270177945614418e-09	1.561516147208975e-09	1.5166547810633691e-09	2.16862727261976e-09	1.3033365258303711e-09	8.877721199118327e-10	1.5258573602549286e-09	1.943244164378293e-09	1.1901040397217413e-09
TraesCS1A01G020200.1	chr1A	2.437987943385332e-10	6.256431497242196e-10	7.016336134346944e-10	5.829304928969492e-10	7.568087120451692e-10	5.594025394130559e-10	5.683446612647245e-10	1.0844777340565105e-09	9.066542967917276e-10	7.9025842577719e-10	3.0034130128175133e-10	7.305799017861931e-10	2.2365135810356014e-10	5.565052716396879e-10	5.598890815807613e-10	4.5735142116017483e-10	5.820303766220764e-10	5.653090139386501e-10	8.083214192128787e-10	4.857980177471965e-10	3.309029767194029e-10	5.68739129369945e-10	7.243134404234799e-10	4.435924045337456e-10
TraesCS1A01G020300.1	chr1A	0.8128672973275646	0.8344009374455225	0.46787353569201634	0.7774363867856567	1.513998592417742	3.730289409130628e-10	0.37899185709744837	7.231672223071367e-10	0.6045884110564885	2.107886489026593	0.801111826736745	0.9743518412979737	2.2370767928646784	6.308648025586958	5.600300760984746	3.354755023108698	6.209887433458914	0.7539351647736159	3.773116552170827	1.2957876114995466	1.7652603021153517	7.585098033980939	11.108936232049762	4.437041125473435
TraesCS1A01G020400.1	chr1A	1.7317038825333585e-10	4.4439459776548647e-10	4.983706567529697e-10	4.1405577928946393e-10	5.375615529762897e-10	3.973438638320205e-10	4.036954568210812e-10	7.70304999941427e-10	6.4399693613318e-10	5.613208989962445e-10	2.1333255520227405e-10	5.189312177923388e-10	1.5885965564866614e-10	3.952859332891345e-10	3.9768945494255794e-10	3.248569107382358e-10	4.134164263131058e-10	4.015392352225175e-10	5.741510509859718e-10	3.450625405028371e-10	2.350405263822368e-10	4.039756476855189e-10	5.144801475969354e-10	3.150838753233258e-10
TraesCS1A01G020500.1	chr1A	34.10841153485761	42.96924364410293	49.080652959888	80.07146689826355	70.26616295638013	86.0888803312871	44.81678823693678	57.930487835591045	109.54752877201145	76.3870930225267	68.7582506454031	71.54770396567349	62.01050796584331	96.96770241394476	101.11779678249478	100.04968726087398	85.86988795763264	85.55987223906476	124.39608515336236	133.45865543521367	131.308404272337	153.35086334807312	135.4194776980788	105.50255163716459
TraesCS1A01G020500.2	chr1A	3.9533325622072016e-10	1.0145150400916923e-09	1.1377377883497066e-09	9.45254099933326e-10	1.227207268521499e-09	9.071022194524018e-10	9.216023656025662e-10	1.7585407469575257e-09	1.470190188551436e-09	1.2814478331034903e-09	4.870200647851056e-10	1.1846757990997177e-09	3.626630718054056e-10	9.024041391928313e-10	9.078911745412469e-10	7.416206755861255e-10	9.437945115096498e-10	9.166798952293603e-10	1.3107379780010428e-09	7.877484084473831e-10	5.365775152192155e-10	9.222420174963959e-10	1.1745143847160902e-09	7.193096676089152e-10
TraesCS1A01G020600.1	chr1A	2.6232393637075825e-10	0.6731828777433713	7.549475044189643e-10	6.272246831333285e-10	8.143151034114619e-10	6.019089493562667e-10	0.6115305422730465	1.166882177887704e-09	9.755467606275884e-10	8.503065060780168e-10	3.2316284672656546e-10	1.5721865752922608	0.9625823590512548	5.987915316139347e-10	6.024324616114816e-10	0.4921034394324297	6.262561711886462e-10	0.6082642301529799	8.697420227857387e-10	5.227115607454597e-10	0.3560467627912271	0.6119549841843298	7.793506664938541e-10	4.772989383199343e-10
TraesCS1A01G020700.1	chr1A	0.06672653313219797	0.17123545861771955	1.9203367528424507e-10	1.5954521397324254e-10	2.0713482888843492e-10	1.531057286166173e-10	1.5555314346552875e-10	2.9681623150197824e-10	2.4814682975757054e-10	2.1628985131348833e-10	8.220193961695893e-11	1.9995613229248984e-10	6.121227868302092e-11	1.523127606513585e-10	1.5323889281920994e-10	1.251748385769657e-10	1.5929885656798535e-10	1.5472230169607705e-10	2.2123360393547317e-10	1.329605324025402e-10	9.056652013984278e-11	1.5566110744926248e-10	1.9824103258308787e-10	1.2140906327703962e-10
TraesCS1A01G020800.1	chr1A	3.7753170023885146e-10	9.688321991051073e-10	1.086506320687176e-09	9.026900264275563e-10	1.171947058184566e-09	8.662560961203346e-10	8.8010331171286e-10	1.6793549940243506e-09	1.4039886420494123e-09	1.223745211378947e-09	4.650899215170044e-10	1.131330748496982e-09	3.463326293907762e-10	8.617695668432124e-10	8.670095251613194e-10	7.082260603696742e-10	9.012961621609697e-10	8.754024964383306e-10	1.2517164433191246e-09	7.522766964880564e-10	5.124158376333209e-10	8.807141605681956e-10	1.1216268948779972e-09	6.869197001200926e-10
TraesCS1A01G020900.1	chr1A	8.72404334481125	7.462626402243625	8.369035177045197	20.859458722275516	4.51357989076495	3.3362565897456538	6.779174161177833	6.46778613210211	5.4072535538389525e-09	18.852291098929282	25.07714577007295	30.500065453701463	1.3338486415550814	3.3189773891340533	16.69579153516186	24.548646554730524	3.471208195577646	6.742965178639704	14.462399451278252	5.794563746116094	7.8939737168651956	115.32594886698402	56.15713034922491	68.78479700115754
TraesCS1A01G021000.1	chr1A	1.6988926527737245	4.3597448959729824e-09	4.889278443092292e-09	4.062105118924004e-09	5.273761767104309	3.898152432541506e-09	3.9604649027078706e-09	7.557097473109578e-09	6.317948889222355e-09	5.506853451205262e-09	2.09290464682652e-09	5.0909883682364195e-09	1.5584968322584929e-09	3.877963050794456e-09	3.901542863225937e-09	3.187017271663534e-09	4.0558327297243636e-09	3.939311233972488e-09	5.63272399493606e-09	3.385245134196254e-09	2.305871269349944e-09	3.96321372255688e-09	5.047321026950987e-09	3.091138650540417e-09
TraesCS1A01G021100.1	chr1A	0.4678110203289965	1.200509465309012	1.3463230495471528e-09	1.1185506860396532	1.4521952677504404e-09	1.0734042930186756e-09	1.0905628003869328	2.080939883899739e-09	1.7397250564525326e-09	1.5163799373555098	2.3052283072258075	1.4018663622679995e-09	3.4332104135203236	3.2035346952023955	5.371689450443381	15.796520390862058	11.168235053981013	16.271068141405884	10.857279585993012	4.660844750912518	5.079600478043523	13.095836649540141	12.5085781986162	13.618929707579976
TraesCS1A01G021200.1	chr1A	1.3341169816252036e-10	3.4236475727830825e-10	0.7678965940500243	2.2329406112588237	2.484847451741615	2.7550488366962695	0.31100985007934845	0.5934484485747752	0.992279635918539	4.3244561096466204e-10	1.6435291708908405e-10	3.997882992208802e-10	0.48954643224326055	1.8271865586453784	0.9191483499814331	27.529928075376482	25.161417348184877	17.942223516894103	1.3269901542400382	1.0633545371491422	0.5432306773992908	0.9336771327176824	1.1890774896966538	0.7282285725957239
TraesCS1A01G021300.1	chr1A	1.944515684965169e-09	4.990069459246185e-09	5.596162073418888e-09	4.6493974252744615e-09	6.036233341854241e-09	4.461740736041483e-09	4.533062238039129e-09	8.64968987886036e-09	7.231387282844865e-09	6.303025034512046e-09	2.395493270464089e-09	5.827034879306745e-09	1.7838216754765882e-09	4.438632407535823e-09	4.46562134947547e-09	3.6477908531088646e-09	4.642218184624272e-09	4.508850207558871e-09	6.447093729143683e-09	3.874678165646315e-09	2.6392502480511414e-09	4.536208477625345e-09	5.7770541874740215e-09	3.5380502626667423e-09
TraesCS1A01G021400.1	chr1A	1.1130675989800621e-09	2.8563845870167822e-09	3.2033203592673637e-09	2.6613792158467613e-09	3.4552232232682893e-09	2.5539619385616765e-09	2.594787350049984e-09	4.9512017927269654e-09	4.1393458239732675e-09	3.6079384680310333e-09	1.371213389300134e-09	3.335475137810068e-09	1.0210841314797024e-09	2.5407344125894713e-09	2.5561832552169933e-09	2.088045798676109e-09	2.657269719474583e-09	2.5809280498440437e-09	3.690405375992591e-09	2.217919225852718e-09	1.5107432454361705e-09	2.596588300985542e-09	3.306865500416164e-09	2.0252287710437213e-09
TraesCS1A01G021500.1	chr1A	4.514855636117463e-11	1.1586146307222418e-10	1.2993396799601865e-10	1.079516011742864e-10	1.4015172176345253e-10	1.0359451180962111e-10	1.052504834624093e-10	2.0083201900703822e-10	1.6790129225152074e-10	1.463461998362123e-10	5.561953743577017e-11	1.3529446674101958e-10	4.1417497465433057e-11	1.0305797323602303e-10	1.0368461347128162e-10	8.46958922464608e-11	1.0778491064376937e-10	0.1046883187919773	1.4969124540707061e-10	8.996385418522808e-11	6.127918612161542e-11	1.0532353413326906e-10	1.3413399470182356e-10	8.214789056614858e-11
TraesCS1A01G021600.1	chr1A	3.934059764828983e-10	1.009569201992525e-09	1.1321912299665272e-09	9.40645914193249e-10	1.2212245396073175e-09	9.02680027035815e-10	9.171094838689767e-10	1.749967726862669e-09	1.463022899393355e-09	1.2752006773053014e-09	4.846458048714672e-10	1.17890041433872e-09	3.6089506170519647e-10	8.980048502753769e-10	9.034651359085046e-10	7.380052183011231e-10	9.391934413743196e-10	9.122110109137998e-10	1.3043480305153584e-09	7.839080749509912e-10	5.339616589597678e-10	9.177460174110996e-10	1.1687885376242384e-09	7.158029781872995e-10
TraesCS1A01G021700.1	chr1A	1.2710754231313962e-10	3.261868597105205e-10	0.7316108719448844	3.0391808332174077e-10	3.9457166164512856e-10	2.9165149131044935e-10	2.9631357807225647e-10	5.654059932627761e-10	4.726955262658978e-10	4.1201108711518006e-10	1.565866835585898e-10	3.8089694426655626e-10	1.1660342513452004e-10	2.901409646193923e-10	2.9190515613818786e-10	0.4768917361046175	0.60689759325295	2.947309054753978e-10	4.214284540412882e-10	2.532768558760733e-10	0.17252039441409922	0.2965192392356046	3.7762984647398607e-10	0.23127243323094923
TraesCS1A01G021800.1	chr1A	8.12662647795111e-11	2.0854771657473987e-10	2.3387787114489815e-10	1.9431016429898305e-10	2.5226957068172307e-10	1.8646751313768533e-10	1.8944822042157486e-10	3.6149257801883685e-10	3.0221809893057596e-10	2.634194752590634e-10	1.0011376709391712e-10	2.4352663392873104e-10	7.455045270118673e-11	1.8550175721322928e-10	1.8662969386025378e-10	1.524504737200583e-10	1.9401012554069214e-10	1.8843633797955002e-10	2.694404730709596e-10	1.6193267258239884e-10	1.1030099223980097e-10	1.8957970978998167e-10	2.414378134744934e-10	1.4786413484458187e-10
TraesCS1A01G021800.2	chr1A	8.12662647795111e-11	2.0854771657473987e-10	2.3387787114489815e-10	1.9431016429898305e-10	2.5226957068172307e-10	1.8646751313768533e-10	1.8944822042157486e-10	3.6149257801883685e-10	3.0221809893057596e-10	2.634194752590634e-10	1.0011376709391712e-10	2.4352663392873104e-10	7.455045270118673e-11	1.8550175721322928e-10	1.8662969386025378e-10	1.524504737200583e-10	1.9401012554069214e-10	1.8843633797955002e-10	2.694404730709596e-10	1.6193267258239884e-10	1.1030099223980097e-10	1.8957970978998167e-10	2.414378134744934e-10	1.4786413484458187e-10
TraesCS1A01G021900.1	chr1A	1.3767950680495545e-10	3.5331692481760153e-10	3.96230711958855e-10	3.2919597892751576e-10	4.2738952217863253e-10	3.159091329421566e-10	3.209589812388549e-10	6.124327233486116e-10	5.120112130314556e-10	4.4627944368905945e-10	1.696105280004431e-10	4.1257743227337156e-10	1.263017266492274e-10	3.1427297063380113e-10	3.16183895932151e-10	2.582782177931634e-10	3.286876599051521e-10	3.1924467240553324e-10	4.5648008489565005e-10	2.743427491990993e-10	1.8686949932885028e-10	3.211817476160406e-10	4.0903859889984543e-10	2.5050814399773054e-10
TraesCS1A01G022000.1	chr1A	1.2771102025883997e-10	3.277355213589977e-10	3.6754219750248684e-10	3.053610178419627e-10	3.964449989110995e-10	2.9303618681815474e-10	2.9772040811651646e-10	5.680904134088309e-10	4.749397780226498e-10	4.13967222840356e-10	1.5733012181880864e-10	3.8270535705832625e-10	1.1715703190073735e-10	2.9151848848702145e-10	2.9329105598928906e-10	2.395779551398898e-10	3.0488950292685624e-10	2.9613022134709107e-10	4.2342930130083146e-10	2.5447935726895674e-10	1.733394821667614e-10	2.979270454147605e-10	3.794227478222305e-10	2.3237046235516488e-10
TraesCS1A01G022100.1	chr1A	2.988792626890908e-09	7.669921576248766e-09	8.60150837210681e-09	7.146296042551489e-09	9.277914210627815e-09	6.85786076095265e-09	6.967484551060142e-09	1.3294893702692777e-08	1.1114910082891182e-08	9.687982923416664e-09	3.681961878676286e-09	8.956368425601107e-09	2.7417999826769787e-09	6.822342404175433e-09	6.863825407527112e-09	5.606789644593255e-09	7.135261283774344e-09	6.9302697634701174e-09	9.90942184294307e-09	5.9555238471971135e-09	4.056625381263791e-09	6.9723204378315486e-09	8.879546251117479e-09	5.4381142926174e-09
TraesCS1A01G022200.1	chr1A	2.6567045572363625e-09	6.817708067776681e-09	7.645785219650498e-09	6.352263148934657e-09	8.247034853891391e-09	6.095876231957911e-09	6.193319600942348e-09	1.1817683291282468e-08	9.879920073681051e-09	8.611540376370369e-09	3.272855003267809e-09	7.961216378312096e-09	2.4371555401573143e-09	6.064304359267051e-09	6.101178140024099e-09	4.983813017416227e-09	6.342454474466083e-09	6.1602397897512154e-09	8.80837497150495e-09	5.293798975286323e-09	3.6058892277900368e-09	6.197618166961377e-09	7.892930000993314e-09	4.833879371215467e-09
TraesCS1A01G022300.1	chr1A	1.694433615245239e-09	4.348301995983553e-09	4.876445691273153e-09	4.051443425698482e-09	5.259919867442541e-09	3.887921061327487e-09	3.950069981703388e-09	7.537262571605355e-09	6.301366346206025e-09	5.492399767606298e-09	2.0874114587771068e-09	5.077626194041573e-09	1.5544062893916728e-09	3.86778467008371e-09	3.8913025932437166e-09	3.178652396934759e-09	4.045187499462621e-09	3.928971834408256e-09	5.617939942455914e-09	3.3763599763637178e-09	2.299819113787346e-09	3.9528115868021375e-09	5.03407346520046e-09	3.0830254257358496e-09
TraesCS1A01G022400.1	chr1A	2.583350169701625e-10	6.62946402748993e-10	7.43467710434202e-10	6.176870528976076e-10	8.019325608225723e-10	5.92756272255211e-10	6.022315578347302e-10	1.1491384713011764e-09	9.607125161682652e-10	8.37376675253301e-10	3.1824880583996703e-10	7.741398879271066e-10	2.3698631302850233e-10	5.896862582240469e-10	5.932718239399184e-10	4.846204734822501e-10	6.167332682253935e-10	5.990149135292298e-10	8.565166538918379e-10	5.147631656640962e-10	3.5063268601559775e-10	6.026495456469045e-10	7.67499796014956e-10	4.700410913186709e-10
TraesCS1A01G022500.1	chr1A	0.21462074735838274	5.507656451029699e-10	6.176615054438401e-10	5.131648753959845e-10	6.662332012950824e-10	4.924527674088338e-10	5.003246885069783e-10	9.546865158848535e-10	7.981451389310156e-10	6.956796248198136e-10	0.2643961989991295	6.431434773702922e-10	3.1501531717831996	0.9798044947065867	4.435929718655349	4.026152138404731e-10	2.049489943724152	0.4976523505340703	0.7115808245399395	0.4276572979657479	2.3304018150598607	2.0026877858352656	3.825761949257391	4.295531768761162
TraesCS1A01G022600.1	chr1A	2.1884040929099526e-09	5.615942577863504e-09	6.2980535877121055e-09	5.232542187088548e-09	6.793320235578332e-09	5.021348896155161e-09	5.101615806877935e-09	9.734566236547931e-09	8.13837484035422e-09	7.093573937145762e-09	2.6959449687934836e-09	6.557883321796065e-09	2.007555241553313e-09	4.995342234921672e-09	5.0257162305961224e-09	4.105310383837773e-09	5.22446249930596e-09	5.0743670132526965e-09	7.255712264663399e-09	4.360654749134158e-09	2.970274855433827e-09	5.105156659564795e-09	6.501633865225e-09	3.981805719340198e-09
TraesCS1A01G022700.1	chr1A	2.7600650167098593e-10	7.082954512482829e-10	7.943248432556952e-10	6.599401219286539e-10	8.567889993568225e-10	6.333039437220061e-10	6.434273890675463e-10	1.2277456347933475e-09	1.0264303454059407e-09	8.946576791184265e-10	3.4001871132709603e-10	8.270951602949291e-10	2.531974332014653e-10	6.300239244557047e-10	6.338547618750988e-10	5.177710830406769e-10	6.589210933284559e-10	6.399907092387967e-10	9.151069337647298e-10	5.499756951665568e-10	3.74617820586994e-10	6.438739694619985e-10	8.200008508941322e-10	5.021943938458138e-10
TraesCS1A01G022800.1	chr1A	4.879661431658626e-10	1.2522320940814313e-09	1.4043278974868262e-09	1.1667422110288143e-09	1.5147615037759698e-09	1.1196507364820651e-09	1.1375484981322682e-09	2.1705948902355555e-09	1.8146791972067235e-09	1.5817114977006798e-09	6.011366332532711e-10	1.4622642327512014e-09	4.476408134982822e-10	1.1138518210898666e-09	1.1206245563309571e-09	9.153942276886946e-10	1.1649406177590765e-09	1.1314726144441007e-09	1.6178647906845828e-09	9.723304240321817e-10	6.623061846961292e-10	1.1383380306663754e-09	1.4497218369171392e-09	8.87855394713045e-10
TraesCS1A01G022900.1	chr1A	4.671340140437308e-10	1.198772113219778e-09	1.3443746804450585e-09	1.116931942974762e-09	1.4500936827030446e-09	1.0718508859376064e-09	1.0889845608024534e-09	2.077928393474414e-09	1.7372073646197502e-09	1.514185464151953e-09	5.754730577381169e-10	1.3998376121055278e-09	4.285302433127549e-10	1.0662995363978968e-09	1.0727831317119073e-09	8.763144451752119e-10	1.115207262876453e-09	1.0831680672283252e-09	1.5487953097508704e-09	9.308199355966544e-10	6.340311739167719e-10	1.0897403868101408e-09	1.3878306731124276e-09	8.499512932021406e-10
TraesCS1A01G023000.1	chr1A	1.5932359511560615e-10	4.088605776085226e-10	4.585206832120116e-10	3.8094766663156997e-10	4.945778552555794e-10	3.65572044512777e-10	3.7141576086598984e-10	7.087110167279466e-10	5.925026105391153e-10	5.164373917714707e-10	1.962743745789925e-10	4.774372112363868e-10	1.461571560360877e-10	3.6367866715249097e-10	3.658900019807147e-10	2.9888118539786355e-10	3.803594366473984e-10	3.694319518532935e-10	5.282416382220393e-10	3.17471162634397e-10	2.1624656524012314e-10	3.7167354752507764e-10	4.733420508986612e-10	2.898896069114903e-10
TraesCS1A01G023100.1	chr1A	5.589430367172607e-10	1.4343749441296394e-09	1.6085937734849098e-09	1.336450168996642e-09	1.7350904497797472e-09	1.282509025424911e-09	1.303010097860598e-09	2.486317783360727e-09	2.0786325349822467e-09	1.8117786246389608e-09	6.885746889992013e-10	1.6749572120604667e-09	5.127522045525778e-10	1.2758666314302107e-09	1.2836244917972779e-09	1.0485424789888685e-09	1.3343865257967603e-09	1.2960504492723336e-09	1.8531905784205222e-09	1.113760303891408e-09	7.586416297428389e-10	1.3039144714905753e-09	1.6605904677414503e-09	1.016997997580397e-09
TraesCS1A01G023200.1	chr1A	6.347878145609008e-10	1.629009892300623e-09	1.8268690347837473e-09	1.5177973895684578e-09	1.9705304518147573e-09	1.4565367987864034e-09	1.4798197276587912e-09	2.823694237740059e-09	2.360688867162729e-09	2.0576246916991144e-09	7.820096025507155e-10	1.902237541720589e-09	5.823291998605973e-10	1.4489930769930122e-09	1.4578036263774398e-09	1.1908225793826382e-09	1.5154537239874713e-09	1.4719157019759543e-09	2.104655966642776e-09	1.2648900206436347e-09	8.615841517728407e-10	1.4808468186544882e-09	1.8859213276709687e-09	1.1549977258656426e-09
TraesCS1A01G023300.1	chr1A	5.565337994900311e-10	1.4281922935083911e-09	1.6016601796336818e-09	1.3306896079233807e-09	1.7276116116341447e-09	1.2769809692808383e-09	1.297393675024992e-09	2.4756008963634827e-09	2.0696729119866338e-09	1.8039692340155167e-09	6.85606694650067e-10	1.667737568905034e-09	5.105420657398512e-10	1.2703672062947357e-09	1.2780916276084967e-09	1.0440228993380545e-09	1.3286348597372915e-09	1.2904640249220218e-09	1.8452026879962956e-09	1.108959612926359e-09	7.553716227180852e-10	1.298294150492771e-09	1.653432750208082e-09	1.0126143855218607e-09
TraesCS1A01G023400.1	chr1A	8.729941952784802e-11	2.2403016368759073e-10	2.512408124915579e-10	2.0873562477229498e-10	2.709978998641795e-10	2.0031074027934716e-10	2.0351273333725366e-10	3.8832955237074234e-10	3.2465457442927585e-10	2.829755661200811e-10	1.0754614818040266e-10	2.6160589316157393e-10	8.008502991997665e-11	1.9927328726191931e-10	2.0048496119348967e-10	1.6376829793538107e-10	2.0841331133133985e-10	2.0242572939953284e-10	2.8944355890137973e-10	1.7395444908648769e-10	1.1848966630871923e-10	2.0365398439102292e-10	2.5936200003264033e-10	1.5884147223872328e-10
TraesCS1A01G023400.2	chr1A	8.729941952784802e-11	2.2403016368759073e-10	2.512408124915579e-10	2.0873562477229498e-10	2.709978998641795e-10	2.0031074027934716e-10	2.0351273333725366e-10	3.8832955237074234e-10	3.2465457442927585e-10	2.829755661200811e-10	1.0754614818040266e-10	2.6160589316157393e-10	8.008502991997665e-11	1.9927328726191931e-10	2.0048496119348967e-10	1.6376829793538107e-10	2.0841331133133985e-10	2.0242572939953284e-10	2.8944355890137973e-10	1.7395444908648769e-10	1.1848966630871923e-10	2.0365398439102292e-10	2.5936200003264033e-10	1.5884147223872328e-10
TraesCS1A01G023500.1	chr1A	1.1067704567262748e-10	2.8402246879302826e-10	3.1851976827962817e-10	2.646322553044954e-10	3.435675414873321e-10	2.53951298536906e-10	2.5801074284741826e-10	4.923190536227739e-10	4.1159276151285705e-10	3.587526678309617e-10	1.363455795978189e-10	3.3166048001540194e-10	1.0153073825788229e-10	2.52636029367717e-10	2.5417217350006107e-10	2.0762327502694035e-10	0.2642236308651594	2.5663265367898947e-10	3.6695270325316356e-10	2.2053714229291558e-10	1.5021962666774884e-10	2.5818981905908013e-10	3.288157020814976e-10	2.0137711078439199e-10
TraesCS1A01G023600.1	chr1A	4.082068968753943e-11	1.0475517296678683e-10	1.1747871061492703e-10	9.760353747651733e-11	1.2671700723968433e-10	9.36641115628057e-11	9.51613444849188e-11	1.815805905647575e-10	1.5180654934584226e-10	1.3231769278899775e-10	5.0287939664500644e-11	1.2232536072904454e-10	3.7447283987241695e-11	9.317900469819118e-11	9.374557622673767e-11	7.657708272097016e-11	9.745282562726894e-11	9.465306790449228e-11	1.3534208776956709e-10	8.134006645555337e-11	5.5405063696046726e-11	9.522739263810399e-11	1.2127612963903732e-10	7.427332830890663e-11
TraesCS1A01G023700.1	chr1A	3.4802113612724126	1.4885023005118899e-09	1.669295425314529e-09	1.386882250845572e-09	3.601131123984946	1.3309055924220774e-09	4.056540872050269	10.320564386341648	6.471214497856519	5.6404428899071	2.8582345588244507	8.690815724693415	4.256810755308218	1.3240125433742314	1.332063153197163	1.0881101197054294e-09	1.3847407343173928e-09	4.0348740415324125	21.15434528389323	4.623155979572955	1.5745392323290106	5.412475166030978	1.7232542589769767e-09	6.33225168410313
TraesCS1A01G023800.1	chr1A	2.9040900018373194e-10	7.452555377731594e-10	8.357740928362892e-10	6.943769434058127e-10	9.014977370650509e-10	6.663508431694882e-10	6.770025474714308e-10	1.2918115338648853e-09	1.0799912631149326e-09	9.413424702914976e-10	3.5776147809000346e-10	8.702544219207554e-10	2.664097149159817e-10	6.628996668024712e-10	6.669304039702456e-10	5.447892772074418e-10	6.933047401238229e-10	6.733865357217928e-10	9.628588025531727e-10	5.786743819138896e-10	3.941660289487085e-10	6.774724312063043e-10	8.627899191369209e-10	5.283997693231482e-10
TraesCS1A01G023800.2	chr1A	2.9040900018373194e-10	7.452555377731594e-10	8.357740928362892e-10	6.943769434058127e-10	9.014977370650509e-10	6.663508431694882e-10	6.770025474714308e-10	1.2918115338648853e-09	1.0799912631149326e-09	9.413424702914976e-10	3.5776147809000346e-10	8.702544219207554e-10	2.664097149159817e-10	6.628996668024712e-10	6.669304039702456e-10	5.447892772074418e-10	6.933047401238229e-10	6.733865357217928e-10	9.628588025531727e-10	5.786743819138896e-10	3.941660289487085e-10	6.774724312063043e-10	8.627899191369209e-10	5.283997693231482e-10
TraesCS1A01G023900.1	chr1A	3.98014307896693e-10	1.0213952284030417e-09	1.1454536426480091e-09	9.516645777997049e-10	1.2355298825496964e-09	9.132539607680469e-10	9.278524432977747e-10	1.7704667322944757e-09	1.4801606522222534e-09	1.2901382931307023e-09	4.903229135598505e-10	1.1927099752958317e-09	3.6512256242800697e-10	9.085240192983312e-10	9.140482663537952e-10	7.466501622886208e-10	9.501950908108867e-10	9.228965899565631e-10	1.319627076495501e-09	7.930907219448683e-10	5.402164502792717e-10	9.284964331514268e-10	1.1824796487308106e-09	7.241878466124281e-10
TraesCS1A01G024000.1	chr1A	4.109352052249752e-10	1.0545531893505623e-09	1.1826389614099751e-09	9.8255884480657e-10	1.2756393822378152e-09	9.42901288584196e-10	9.5797368747867e-10	1.8279421004338887e-09	1.5282116982205568e-09	1.3320205674462122e-09	5.062404619949571e-10	1.2314293952449644e-09	3.7697568189575255e-10	9.380177971367875e-10	9.43721380029189e-10	7.708889645016824e-10	9.810416532751485e-10	9.528569502925178e-10	1.3624666569546167e-09	8.188371425808888e-10	5.577537125098529e-10	9.586385834319633e-10	1.2208669575056493e-09	7.476974457067845e-10
TraesCS1A01G024100.1	chr1A	1.765324603249757e-10	4.5302243928622736e-10	5.080464337913784e-10	4.2209459808343493e-10	5.479982142454492e-10	4.050582237806323e-10	4.11533131809951e-10	7.852603335470714e-10	6.565000213028426e-10	5.722188437128793e-10	2.1747436855183965e-10	5.290061744407545e-10	1.6194388740996099e-10	4.029603388848492e-10	4.054105244806826e-10	3.3116394947556546e-10	4.2144283218355435e-10	4.093350475552489e-10	5.852980908054971e-10	3.5176186792304527e-10	2.39603796104178e-10	4.118187625298372e-10	5.244686875147321e-10	3.2120117232850927e-10
TraesCS1A01G024200.1	chr1A	1.1430226760064378e-10	2.933256126894004e-10	3.28952869754793e-10	2.7330027358199743e-10	3.548210817095623e-10	2.6226946252935064e-10	2.664618737657561e-10	5.084449433041147e-10	4.2507446492643324e-10	3.705035962213172e-10	1.4081157326382393e-10	3.4252400494508485e-10	1.0485637327518189e-10	2.6091111177441456e-10	2.6249757224253824e-10	2.1442396657792902e-10	2.7287826439363636e-10	2.6503864534517447e-10	3.7897222345532987e-10	2.2776082701745337e-10	1.5514006415598068e-10	2.6664681561112154e-10	3.395860464308384e-10	2.079732094910337e-10
TraesCS1A01G024200.2	chr1A	1.1430226760064378e-10	2.933256126894004e-10	3.28952869754793e-10	2.7330027358199743e-10	3.548210817095623e-10	2.6226946252935064e-10	2.664618737657561e-10	5.084449433041147e-10	4.2507446492643324e-10	3.705035962213172e-10	1.4081157326382393e-10	3.4252400494508485e-10	1.0485637327518189e-10	2.6091111177441456e-10	2.6249757224253824e-10	2.1442396657792902e-10	2.7287826439363636e-10	2.6503864534517447e-10	3.7897222345532987e-10	2.2776082701745337e-10	1.5514006415598068e-10	2.6664681561112154e-10	3.395860464308384e-10	2.079732094910337e-10
TraesCS1A01G024300.1	chr1A	3.5495763985656823	2.277255067076405	5.1076998181156075	1.0608934341819392	4.132019526110551	4.0722967003054205	1.0343482230474004	3.947349884835035	4.9501455231026155	7.191080109541307	8.199007895330906	1.3296052109033778	4.070301005211185e-10	1.0128013465992395e-09	2.0379192972744318	8.323481534241534e-10	2.1185105677881326	2.057647106059126	1.4710894282307238e-09	8.841190041199839e-10	0.6022206757589071	2.0701322547417527	1.3182006818964653	1.6146153784091748
TraesCS1A01G024400.1	chr1A	0.9805273504519317	5.032512334355205e-10	0.5643760055385775	0.468894273005687	6.087574330181069e-10	4.4996899282070853e-10	4.571618052943471e-10	8.723259537611299e-10	7.292893614533703e-10	0.6356635217346913	1.2079340309130293	2.9382982690108665	0.35979878283981875	0.8952770109591168	0.4503603552577286	0.36788170244325935	4.681702421917552e-10	4.547200087817574e-10	0.6501929283767127	0.3907634119930042	0.2661698308715705	1.8299164215651513	0.582619074167484	0.7136286074074573
TraesCS1A01G024400.2	chr1A	2.859075320675093e-10	7.337037468865073e-10	8.228192242582245e-10	6.83613793264447e-10	8.875241228944233e-10	6.560221099936989e-10	6.665087081616434e-10	1.2717878829856686e-09	1.0632509202411405e-09	9.267512451098314e-10	3.5221601673785547e-10	8.567650929715851e-10	2.622802463499678e-10	6.526244283887924e-10	6.565926873453746e-10	5.363448021400102e-10	6.825582096081746e-10	6.629487461955471e-10	9.479340646925168e-10	5.697046727168186e-10	3.880562809357745e-10	6.669713084905289e-10	8.494162932867029e-10	5.202093388863413e-10
TraesCS1A01G024500.1	chr1A	1.567785447199542	0.8940653325947573	0.5013291446931993	0.8330274937738379	1.081505380732662	1.1991078722554278	0.40609192243226316	0.7748777772944784	1.9434597237221551	0.5646530797492184	3.2189844813023387	1.5660352783929017	0.9588161840641103	0.39763247727348067	4.000502666016881e-10	0.6535707306193613	1.2476117953121941	2.0196145024405463	1.7326781857440756	1.7355547102696371	1.41861481246468	0.40637377659946994	5.175342661201767e-10	2.2186801974128825
TraesCS1A01G024600.1	chr1A	10.25892043591475	9.402401025172553	7.381090045677311	11.388648858699307	9.09888522018666	9.247603387914184	22.20737414316614	24.44691010192752	25.888530637109096	3.5628904293227026	10.832741418758891	7.685601056437826	13.444467565789624	15.054067689504942	15.145603397246308	13.74649901580813	14.86985212006845	11.893947653933356	35.22850080949819	35.773702837696156	30.334901262433565	11.111393751950628	13.062306404548513	9.999710731699778
TraesCS1A01G024700.1	chr1A	0.9317638046401301	1.7079412997949217	1.149232459171781	1.9096081799361502	1.652807810306487	0.9162667576450753	0.9309134001220513	0.5921024830213066	0.4950145526402712	1.2943944198900212	3.1156230001820164	0.7977631261431452	0.6105451509037867	1.8230424241824714	1.222751578058971	2.996453352576656	1.271106340355103	2.160529460590465	2.647960971256629	1.3261785064452114	1.8066620256507255	0.6210396764225258	1.1863806129158985	1.453153840083873
TraesCS1A01G024800.1	chr1A	3.2605010475173534e-09	8.367187174089563e-09	9.383463678661975e-09	7.795959319147078e-09	1.0121360957048524e-08	7.481302648311981e-09	7.600892237520155e-09	1.4503520402937574e-08	1.2125356454063106e-08	1.056870864372727e-08	4.016685685828675e-09	9.77058373701939e-09	2.9910545265567036e-09	7.442555350009563e-09	7.487809535484122e-09	6.116497794101732e-09	7.783921400481103e-09	7.560294287421947e-09	1.081027837411971e-08	6.496935106033214e-09	4.425409506833226e-09	7.606167750361688e-09	9.686777728491792e-09	5.9324883192189815e-09
TraesCS1A01G024900.1	chr1A	3.2605010475173534e-09	8.367187174089563e-09	9.383463678661975e-09	7.795959319147078e-09	1.0121360957048524e-08	7.481302648311981e-09	7.600892237520155e-09	1.4503520402937574e-08	1.2125356454063106e-08	1.056870864372727e-08	4.016685685828675e-09	9.77058373701939e-09	2.9910545265567036e-09	7.442555350009563e-09	7.487809535484122e-09	6.116497794101732e-09	7.783921400481103e-09	7.560294287421947e-09	1.081027837411971e-08	6.496935106033214e-09	4.425409506833226e-09	7.606167750361688e-09	9.686777728491792e-09	5.9324883192189815e-09
TraesCS1A01G025000.1	chr1A	3.2605010475173534e-09	8.367187174089563e-09	9.383463678661975e-09	7.795959319147078e-09	1.0121360957048524e-08	7.481302648311981e-09	7.600892237520155e-09	1.4503520402937574e-08	1.2125356454063106e-08	1.056870864372727e-08	4.016685685828675e-09	9.77058373701939e-09	2.9910545265567036e-09	7.442555350009563e-09	7.487809535484122e-09	6.116497794101732e-09	7.783921400481103e-09	7.560294287421947e-09	1.081027837411971e-08	6.496935106033214e-09	4.425409506833226e-09	7.606167750361688e-09	9.686777728491792e-09	5.9324883192189815e-09
TraesCS1A01G025100.1	chr1A	3.339778620840331e-10	8.570631456128988e-10	9.611618253363016e-10	7.98551446037828e-10	1.0367457162419079e-09	7.663207058281284e-10	7.785704412979775e-10	1.485616678624749e-09	1.2420178882071883e-09	1.0825681900972577e-09	4.1143495385104896e-10	1.00081509566986e-09	3.0637806324791896e-10	7.623517637361062e-10	7.669872157402256e-10	6.265217605960387e-10	7.973183845293627e-10	7.744119342522221e-10	1.1073125287510103e-09	6.654905074984876e-10	4.5330112899791974e-10	7.791108197473431e-10	9.922307243876746e-10	6.076734025894249e-10
TraesCS1A01G025100.2	chr1A	3.2937714663695714e-10	8.45256663504966e-10	9.479213308036075e-10	7.875509924444497e-10	1.0224640150487795e-09	7.557642471253939e-10	7.678452362392809e-10	1.4651515509089997e-09	1.2249084581145382e-09	1.0676552609479587e-09	4.0576722744595795e-10	9.870283571070607e-10	3.0215754911134044e-10	7.518499792356598e-10	7.564215755233959e-10	6.178911036898688e-10	7.863349169873766e-10	7.637440147497679e-10	1.0920587337120931e-09	6.563230362217226e-10	4.470566746698872e-10	7.683781706998033e-10	9.785622399190689e-10	5.993023914313052e-10
TraesCS1A01G025200.1	chr1A	15.044990976901527	17.739209759734013	16.773212211208474	13.28733944034843	13.463981319727791	15.861052728141019	14.218759151335197	13.264189560795248	21.170368312909847	17.57383423481263	13.358030918396286	16.24669813124672	11.066210973666694	14.850734001252256	15.874847930044348	16.01872632476088	16.502632438295063	20.42850881390245	26.06450490248398	25.387561661720888	28.146830905077042	18.971503858031255	17.71807843219368	14.057120128465266
TraesCS1A01G025300.1	chr1A	3.2605010475173534e-09	8.367187174089563e-09	9.383463678661975e-09	7.795959319147078e-09	1.0121360957048524e-08	7.481302648311981e-09	7.600892237520155e-09	1.4503520402937574e-08	1.2125356454063106e-08	1.056870864372727e-08	4.016685685828675e-09	9.77058373701939e-09	2.9910545265567036e-09	7.442555350009563e-09	7.487809535484122e-09	6.116497794101732e-09	7.783921400481103e-09	7.560294287421947e-09	1.081027837411971e-08	6.496935106033214e-09	4.425409506833226e-09	7.606167750361688e-09	9.686777728491792e-09	5.9324883192189815e-09
TraesCS1A01G025400.1	chr1A	6.061776595384377e-10	1.555589728140595e-09	1.7445312754695503e-09	1.4493896198977667e-09	1.8817178117329653e-09	1.3908900698270163e-09	1.4131236272572685e-09	2.696429145334873e-09	2.2542916224455353e-09	1.964886677425352e-09	7.467640993371622e-10	1.8165028919529006e-09	5.560833767682887e-10	1.3836863467623413e-09	1.3920998009632453e-09	1.1371517025653926e-09	1.4471515843147965e-09	1.405575839351686e-09	2.0097982329349324e-09	1.2078808929526539e-09	8.227521900027971e-10	1.4141044268278072e-09	1.8009220565646719e-09	1.1029414903336701e-09
TraesCS1A01G025500.1	chr1A	1.1446439849956593	1.174966710140486	1.317677878939031	0.5473758676364261	7.106487480480879e-10	1.5758488562335513	5.336796677407768e-10	1.0183322846288427	0.8513548157111049	7.420582664744679e-10	0.8460678362331691	6.860197091949784e-10	2.1001021143908772e-10	5.22562396915565e-10	5.257398184488852e-10	4.294562280965046e-10	5.465306515231412e-10	5.308291733721791e-10	7.590195454169159e-10	4.561677840406299e-10	3.107202419691414e-10	5.34050076089225e-10	6.801354575324025e-10	4.165364139026094e-10
TraesCS1A01G025600.1	chr1A	0.23441510822585887	1.8046874303071547	0.6746281082908485	5.604938072589403e-10	0.7276795466592729	5.378714322315804e-10	5.464693765537367e-10	2.08547352303376	1.7435153079919428	0.7598417986748743	0.8663439717420249	7.024602686745967e-10	0.4300862720075103	0.5350856792939432	5.383392476491853e-10	4.397482074190788e-10	0.5596283365419299	5.435505696839308e-10	5.440466894942031	0.46709991005118723	1.909000179736421	5.468486617907097e-10	0.6964350007840803	0.8530375365233658
TraesCS1A01G025700.1	chr1A	1.3838782581102596e-10	3.551346324693963e-10	3.9826919793677835e-10	3.3088959168084064e-10	4.2958831071717214e-10	3.1753438893156963e-10	3.226102171551963e-10	6.155835026327202e-10	5.146453543203635e-10	0.4485754155521123	1.7048312235671546e-10	4.1470001713394197e-10	1.269515104519244e-10	3.1588980906793e-10	3.178105654932168e-10	2.5960698032843365e-10	3.303786575123812e-10	3.2088708872659063e-10	4.58828535493184e-10	2.7575415884128113e-10	1.8783088582057426e-10	3.22834129597345e-10	4.111429775437032e-10	2.5179693187681855e-10
TraesCS1A01G025800.1	chr1A	5.103392943940206e-10	1.3096466881183664e-09	1.4687160540514393e-09	1.2202371108230208e-09	1.5842130193641168e-09	1.1709865014749189e-09	1.1897048719596764e-09	2.2701162369815334e-09	1.897881879766399e-09	1.6542326572790508e-09	6.286986290862273e-10	1.5293087588378175e-09	4.681650563306145e-10	1.1649217069580184e-09	1.1720049707714277e-09	9.573648721202712e-10	1.2183529148579116e-09	1.1833504102051741e-09	1.6920435716013462e-09	1.0169115818138943e-09	6.926727923738963e-10	1.1905306044044382e-09	1.516191296633498e-09	9.28563389095145e-10
TraesCS1A01G025900.1	chr1A	1.1845490044191486e-10	3.0398221293022636e-10	3.409038180504717e-10	2.8322934774149016e-10	3.6771182926524917e-10	2.7179778428729766e-10	2.761425069777964e-10	5.269168880333284e-10	4.4051753723018256e-10	3.8396409384550446e-10	1.4592729647597753e-10	3.549679963174017e-10	1.0866583417582153e-10	2.703900842755768e-10	2.720341812891479e-10	2.222140482994758e-10	2.8279200684316665e-10	2.7466757227698077e-10	3.9274038863774366e-10	2.3603544054946356e-10	1.6077634538586767e-10	2.763341678113054e-10	3.519233009617202e-10	2.1552893343217587e-10
TraesCS1A01G025900.2	chr1A	1.1845490044191486e-10	3.0398221293022636e-10	3.409038180504717e-10	2.8322934774149016e-10	3.6771182926524917e-10	2.7179778428729766e-10	2.761425069777964e-10	5.269168880333284e-10	4.4051753723018256e-10	3.8396409384550446e-10	1.4592729647597753e-10	3.549679963174017e-10	1.0866583417582153e-10	2.703900842755768e-10	2.720341812891479e-10	2.222140482994758e-10	2.8279200684316665e-10	2.7466757227698077e-10	3.9274038863774366e-10	2.3603544054946356e-10	1.6077634538586767e-10	2.763341678113054e-10	3.519233009617202e-10	2.1552893343217587e-10
TraesCS1A01G026000.1	chr1A	7.055510463480176e-10	1.8106044376718403e-09	2.030520009153083e-09	1.686994475618712e-09	2.1901961415252544e-09	1.6189048353724288e-09	1.64478323828305e-09	3.1384667101438685e-09	2.6238476261251313e-09	2.2869992474950814e-09	8.691844434907953e-10	2.114290251289442e-09	6.472445860745654e-10	1.6105201741004301e-09	1.6203128830883673e-09	1.3235700144613586e-09	1.6843895489565663e-09	1.6359981080978638e-09	2.3392733530882e-09	1.4058941540924333e-09	9.57629598199977e-10	1.6459248246684312e-09	2.096155180591667e-09	1.283751570716239e-09
TraesCS1A01G026100.1	chr1A	7.40343127761968e-10	1.899888830813915e-09	2.1306488628154484e-09	1.7701834233843136e-09	2.2981989329078072e-09	1.6987361517956105e-09	1.7258906686112279e-09	3.2932305502083027e-09	2.753234607688641e-09	2.3997755865344033e-09	9.120456029748596e-10	2.2185499769837606e-09	6.791614635988845e-10	1.689938026722355e-09	1.7002136330571745e-09	1.3888378018717237e-09	1.7674500427697916e-09	1.71667232673113e-09	2.454627428985898e-09	1.4752215034341473e-09	1.004852158661673e-09	1.7270885488206589e-09	2.1995206310107514e-09	1.3470558339510993e-09
TraesCS1A01G026200.1	chr1A	5.248611442345008e-10	1.3469130586393794	1.5105087872968056e-09	1.254959305033432e-09	1.6292922516224455e-09	3.6129217679500933	1.223558263848754	2.3347130404728776e-09	1.951886650654728	1.7013043182585362e-09	6.465884274748599e-10	1.5728256747397066e-09	4.81486826226201e-10	1.1980698856112953e-09	1.205354705712078e-09	9.84606961977352e-10	1.2530214937359822e-09	1.2170229828532888e-09	1.7401911529070755e-09	1.045848090239493e-09	1.4247659882782024	1.2244074915216377e-09	1.559334952975087	9.549859245572021e-10
TraesCS1A01G026300.1	chr1A	0.4006076374379309	0.5140251511406878	1.152917039592947	0.4789326548975245	0.6217900935462729	4.596022104765039e-10	4.669490111787126e-10	8.910012534227861e-10	7.449024442769144e-10	6.492722033689107e-10	0.7402765430274701	1.8007219180031315	1.8375079002737427e-10	4.57221830376014e-10	4.600019509853726e-10	3.757575436649528e-10	4.781931235790438e-10	4.644549391590274e-10	6.641126646216887e-10	0.39912911954110136	2.7186816082934497e-10	4.67273104117783e-10	5.950921471428405e-10	0.36445320768848627
TraesCS1A01G026400.1	chr1A	1.6257345943299826e-10	4.172004685141611e-10	4.678735352241428e-10	3.887181931984693e-10	5.046661973043586e-10	3.730289409130628e-10	3.789918567184565e-10	7.231672223071367e-10	6.045884104519001e-10	5.269716221249055e-10	2.0027795663411675e-10	4.871759204053989e-10	1.491384528477027e-10	3.710969426597566e-10	3.733533840407596e-10	3.0497772934579276e-10	3.8811796456692476e-10	3.769675821983242e-10	5.390166502331159e-10	3.239469027938999e-10	2.2065753773683678e-10	3.7925490168008424e-10	4.829972274594246e-10	2.9580274167850886e-10
TraesCS1A01G026400.2	chr1A	1.5757364105648915e-10	4.0436979752739405e-10	4.5348445408227254e-10	3.7676347209937064e-10	4.891455868917764e-10	3.6155673037973453e-10	3.6733626141786443e-10	7.009267853994726e-10	5.859947712727593e-10	5.107650259843786e-10	1.9411856621773923e-10	4.72193209648484e-10	1.4455181749041428e-10	3.596841492071988e-10	3.6187119551521995e-10	2.9559838009083303e-10	3.7618170302544743e-10	3.653742418622273e-10	5.224396187639012e-10	3.1398417158764373e-10	2.138713893954061e-10	3.675912166393982e-10	4.681430291045582e-10	2.8670556192466643e-10
TraesCS1A01G026500.1	chr1A	6.219452865206513e-10	1.5960530447685295e-09	1.7899092566233822e-09	1.4870905059644717e-09	1.930664228801164e-09	1.4270692912965052e-09	1.4498811782552898e-09	2.7665674757048554e-09	2.3129292658039452e-09	2.015996446491329e-09	7.661885990309034e-10	1.8637529671771094e-09	5.705479732738221e-10	1.4196781881521133e-09	1.428310489427607e-09	1.1667307930945503e-09	1.4847942555831005e-09	1.4421370606064984e-09	2.062076221652893e-09	1.239299760110382e-09	8.441532585288814e-10	1.4508874899533858e-09	1.8477668499435213e-09	1.1316307198510197e-09
TraesCS1A01G026600.1	chr1A	2.417899653215116e-09	6.2048803762911374e-09	6.958523626872926e-09	5.781273202963002e-09	7.505728350170818e-09	5.547932300995403e-09	5.636616715464385e-09	1.0755419624650337e-08	8.991837370428822e-09	7.83746933130337e-09	2.978665789490928e-09	7.2456014229582005e-09	2.2180853792442975e-09	5.519198349445294e-09	5.552757633055641e-09	4.535829824839487e-09	5.772346207098346e-09	5.606510370447736e-09	8.016610929122483e-09	4.817951876384181e-09	3.281764353381944e-09	5.640528893526646e-09	7.183453146971444e-09	4.399373360319695e-09
TraesCS1A01G026700.1	chr1A	2.988792626890908e-09	7.669921576248766e-09	8.60150837210681e-09	7.146296042551489e-09	9.277914210627815e-09	6.85786076095265e-09	6.967484551060142e-09	1.3294893702692777e-08	1.1114910082891182e-08	9.687982923416664e-09	3.681961878676286e-09	8.956368425601107e-09	2.7417999826769787e-09	6.822342404175433e-09	6.863825407527112e-09	5.606789644593255e-09	7.135261283774344e-09	6.9302697634701174e-09	9.90942184294307e-09	5.9555238471971135e-09	4.056625381263791e-09	6.9723204378315486e-09	8.879546251117479e-09	5.4381142926174e-09
TraesCS1A01G026800.1	chr1A	2.8692409218152713e-09	7.363124713198815e-09	8.257448037222537e-09	6.8604442008494285e-09	8.906797642202702e-09	6.583546330514544e-09	6.6887851690177365e-09	1.2763097954585066e-08	1.0670313679575534e-08	9.300463606479997e-09	3.534683403529234e-09	8.598113688577063e-09	2.6321279833698993e-09	6.549448708008415e-09	6.589272391226028e-09	5.382518058809524e-09	6.8498508324233704e-09	6.6530589729313125e-09	9.513044969225346e-09	5.717302893309229e-09	3.89436036601324e-09	6.693427620318286e-09	8.524364401072778e-09	5.220589720912704e-09
TraesCS1A01G026900.1	chr1A	1.0087175115756811e-09	2.5885985319839586e-09	2.9030090755860484e-09	2.4118749143611274e-09	3.131296046086887e-09	2.314528006821519e-09	2.3515260359827975e-09	4.487026624658812e-09	3.751282152975774e-09	3.269694236653124e-09	1.2426621340532461e-09	3.0227743436403737e-09	9.253574941534802e-10	2.3025405614092087e-09	2.3165410750404e-09	1.8922915050502234e-09	2.408150683273841e-09	2.3389660451711642e-09	3.3444298719932855e-09	2.0099892984290254e-09	1.3691110661765295e-09	2.3531581477681476e-09	2.9968468597521487e-09	1.8353635737583724e-09
TraesCS1A01G027000.1	chr1A	2.4659251619879147e-11	6.328124753513116e-11	7.096737235962837e-11	5.896103686749892e-11	7.654810807851826e-11	5.6581280533451965e-11	5.748573961149697e-11	1.0969049044238503e-10	9.170437654333442e-11	7.993140991054238e-11	3.037829510290595e-11	7.389517112031472e-11	2.2621420789084316e-11	5.6288233739568125e-11	5.663049228517403e-11	4.6259227014214785e-11	5.886999378515119e-11	5.717869629142649e-11	8.175840787149362e-11	4.9136483995209193e-11	3.346948366512525e-11	5.752563844811362e-11	7.3261344165064e-11	4.486755871678222e-11
TraesCS1A01G027100.1	chr1A	1.701579355320074e-10	4.366639590062555e-10	4.897010565037087e-10	4.0685291122591494e-10	5.282101922761223e-10	3.9043171438212235e-10	3.966728157693702e-10	7.569048602481918e-10	6.327940374023445e-10	5.515562233679491e-10	2.09621445913041e-10	5.099039483209907e-10	1.560961508324268e-10	3.884095833689756e-10	3.907712936283226e-10	3.192057362235485e-10	4.062246803624824e-10	3.9455410356076574e-10	5.64163183467502e-10	3.39059871110853e-10	2.3095178765234024e-10	3.96948132464843e-10	5.055303084452754e-10	3.0960271144052674e-10
TraesCS1A01G027200.1	chr1A	6.375262443558141	7.749650491623858	15.450526473939222	12.034303107801675	4.166381434504398	9.23886439390362	4.693274417712537	4.4776980884701745	4.991310974022245	15.226850500262262	7.027112276140657	11.060463295822665	4.617168370304386	7.6591785834160895	7.705749938534898	13.847954465861855	6.408384355459085	7.780344433779829	4.449969061560939	6.686035088998002	5.009637165675155	15.655106181360866	7.974977091397599	6.105159497519862
TraesCS1A01G027300.1	chr1A	4.255630899198656e-10	1.0920916680749728e-09	1.2247368545649777e-09	1.0175345716487287e-09	1.3210477715857668e-09	9.76465342363726e-10	9.92074266993402e-10	1.893010573356387e-09	1.5826107962455472e-09	1.3794359337231375e-09	5.242608871417782e-10	1.2752640605997623e-09	3.903947239671901e-10	9.714080153605097e-10	0.977314627230351	7.98329969170826e-10	1.015963373299445e-09	9.867753915026668e-10	1.4109657996543856e-09	8.479849380320214e-10	5.776078327969538e-10	9.9276283096349e-10	1.2643256362830423e-09	7.743129118031367e-10
TraesCS1A01G027400.1	chr1A	1.9906851908986616e-10	5.10855091110001e-10	5.72903425339214e-10	4.759790148600436e-10	6.179554330852937e-10	4.567677842632662e-10	4.6406927629632763e-10	8.855063335743569e-10	7.403085346606521e-10	6.452680578038851e-10	2.45237053898883e-10	5.965388775608508e-10	1.8261757516442408e-10	4.5440208427440434e-10	4.5716505952076966e-10	3.734401983447866e-10	4.752440448027315e-10	4.615905855410253e-10	6.600169960147095e-10	3.9666763829619997e-10	2.7019151475577513e-10	4.6439137051236946e-10	5.914221369846978e-10	3.6220557730661684e-10
TraesCS1A01G027500.1	chr1A	3.4971788050294476e-10	8.974556123888048e-10	1.0064603512324327e-09	8.361863191717884e-10	1.0856064298459413e-09	8.024365787463555e-10	8.152636311099625e-10	1.5556321992316576e-09	1.3005528591031935e-09	1.1335884677453952e-09	4.3082544192528583e-10	1.0479824376651351e-09	3.208173327509357e-10	0.7982805854688619	8.031345005557183e-10	6.560490591723418e-10	8.34895144796998e-10	8.10909138087511e-10	1.159498980539384e-09	6.968543613188388e-10	4.746647250016137e-10	0.815829477831872	1.0389934952109194	6.36312398269425e-10
TraesCS1A01G027600.1	chr1A	1.9676294038660043e-10	5.049384518347253e-10	5.662681525068792e-10	4.704663045385923e-10	6.107983753415446e-10	4.514775752410156e-10	4.586945025995094e-10	8.752505454988233e-10	7.317344035063989e-10	6.377946697525142e-10	2.4239675885220284e-10	5.896298628253091e-10	1.8050252857611316e-10	4.4913927439862645e-10	4.51870249322114e-10	3.691150756574651e-10	4.697398467830716e-10	4.5624451963107144e-10	6.523727881974102e-10	3.920734992363842e-10	0.2670622015328284	4.5901286637354906e-10	5.845723834932567e-10	3.5801057214427264e-10
TraesCS1A01G027700.1	chr1A	3.470855953808796e-10	8.90700570145018e-10	9.98884843212404e-10	8.298924436511406e-10	1.0774351986535527e-09	7.963967335299851e-10	8.091272381876295e-10	1.5439231396675482e-09	1.2907637515615565e-09	1.125056081429032e-09	4.275826697817622e-10	1.0400943978117415e-09	3.1840257863345557e-10	7.922720211300502e-10	7.970894021644388e-10	6.511110555011522e-10	8.286109877931497e-10	8.048055209191104e-10	1.1507715688579048e-09	6.91609220964826e-10	4.710919797596661e-10	8.096888250385024e-10	1.0311731130329974e-09	6.315229501104078e-10
TraesCS1A01G027800.1	chr1A	3.430282717366823e-10	8.802885549786044e-10	9.872081872343627e-10	8.201912567434227e-10	1.064840313228272e-09	7.870871011507823e-10	7.996687901323011e-10	1.5258751539753666e-09	1.2756751210969685e-09	1.111904522560042e-09	4.2258436014563103e-10	1.0279360158684459	2.832124955853493	2.3490318168859226	2.3633150188948746	2.573999072337746	6.551398246494837	3.1815903704224864	1.1373194050032613	2.0505735676249324	2.793510358657866	3.200895249624059	3.0573570524134466	3.7448438493128493
TraesCS1A01G027900.1	chr1A	5.240090969224318e-10	1.344726510121537e-09	1.508056662642103e-09	1.2529220334343517e-09	1.626647296668513e-09	1.202352211335854e-09	1.2215719667443106e-09	2.3309229219006818e-09	1.9487180015458563e-09	1.6985424605990256e-09	6.455387709367513e-10	1.5702723863066877e-09	4.807051917680417e-10	1.1961249669658225e-09	1.2033979610599482e-09	9.830085740520641e-10	1.250987367934463e-09	1.2150472961928127e-09	1.7373661672692395e-09	1.044150284898195e-09	7.112265278839114e-10	1.2224198170224145e-09	1.5568035635076097e-09	9.534356227316222e-10
TraesCS1A01G028000.1	chr1A	4.073054936330827e-10	1.0452385239556679e-09	1.1721929390378995e-09	9.738800916032313e-10	1.2643719050445478e-09	9.34572822943705e-10	9.49512090239111e-10	1.8117962396098676e-09	1.5147132983624577e-09	1.3202550860933753e-09	5.017689374095127e-10	1.2205524163595201e-09	3.736459282386293e-10	9.297324664365258e-10	9.353856706787736e-10	7.640798506196487e-10	9.72376301132655e-10	9.44440548207915e-10	1.350432251151863e-09	8.116045116685025e-10	5.528271812952548e-10	9.50171113294394e-10	1.2100832746002369e-09	7.410931780475448e-10
TraesCS1A01G028100.1	chr1A	2.735505116137441e-09	7.01992822232938e-09	7.872566984640131e-09	6.540677733860683e-09	8.491650294472913e-09	6.27668612019395e-09	6.377019758597418e-09	1.2168207795684913e-08	1.0172968550442775e-08	8.8669674214322e-09	3.369931210991854e-09	8.19735415224508e-09	2.509444051941641e-09	6.24417779365209e-09	6.282145288245153e-09	5.131637979797216e-09	6.53057812413245e-09	6.342958766565869e-09	9.069640330829249e-09	5.450818436417696e-09	3.712843569292283e-09	6.3814458244559935e-09	8.12704233153125e-09	4.977257149175247e-09
TraesCS1A01G028200.1	chr1A	2.9478502621389772e-09	7.564854157396044e-09	8.483679490297127e-09	7.048401576215166e-09	9.150819495413734e-09	6.763917462857407e-09	6.872039557210003e-09	1.3112771871149039e-08	1.0962651040659795e-08	9.55527082857534e-09	3.6315240447218155e-09	8.833678447168216e-09	2.704241078804691e-09	6.7288856589127555e-09	6.769800401944548e-09	5.529984306996087e-09	7.037517978517161e-09	6.8353345612308e-09	9.773676338245218e-09	5.873941328742359e-09	4.001055170561547e-09	6.876809198957144e-09	8.757908631239155e-09	5.363619576280175e-09
TraesCS1A01G028300.1	chr1A	6.897950714910098e-11	1.7701710230470492e-10	1.985175561892372e-10	1.6493214501454443e-10	2.1412858953901143e-10	1.582752350000825e-10	1.608052850762892e-10	3.068380211327748e-10	2.5652533154231167e-10	2.2359272480585527e-10	8.497742983161423e-11	2.0670750934179284e-10	6.327906787672051e-11	1.5745549303364606e-10	1.5841289539756983e-10	1.294012782596584e-10	1.6467746952615216e-10	1.5994639052351162e-10	2.2870339973028134e-10	1.3744985051763826e-10	9.362443448584024e-11	1.6091689438739334e-10	2.0493450050661129e-10	1.2550835422645138e-10
TraesCS1A01G028400.1	chr1A	9.030342808902449e-11	2.317391328115448e-10	2.598861111169494e-10	2.159183025865326e-10	2.8032304790818406e-10	2.0720351438883374e-10	0.21051568954174954	4.0169213033733947e-10	3.358260704860114e-10	2.927128705354595e-10	1.1124685491594315e-10	2.7060785843192606e-10	8.284078839812945e-11	2.0613036219078102e-10	2.073837303155485e-10	0.1694036318986165	2.155848982088765e-10	0.20939128135494245	2.994034295811586e-10	1.7994029248770128e-10	1.225669439576135e-10	2.1066180089125956e-10	2.682867520270493e-10	0.16430727211917626
TraesCS1A01G028500.1	chr1A	1.6506755494974073e-10	4.236008848043298e-10	4.750513445090952e-10	3.9468165307878334e-10	5.124084555089768e-10	3.787517065624578e-10	3.848061015159782e-10	7.342615801026949e-10	6.138636097940413e-10	5.350560755453847e-10	2.0335048984762918e-10	4.946498542392839e-10	1.5142643729435627e-10	3.767900688575539e-10	3.790811270840849e-10	3.0965649788599924e-10	3.940722161327687e-10	3.8275077190221056e-10	5.472858905844293e-10	3.289166839669078e-10	2.2404272113346432e-10	3.85073181941093e-10	4.904070545234915e-10	3.0034075356823284e-10
TraesCS1A01G028500.2	chr1A	1.6506755494974073e-10	4.236008848043298e-10	4.750513445090952e-10	3.9468165307878334e-10	5.124084555089768e-10	3.787517065624578e-10	3.848061015159782e-10	7.342615801026949e-10	6.138636097940413e-10	5.350560755453847e-10	2.0335048984762918e-10	4.946498542392839e-10	1.5142643729435627e-10	3.767900688575539e-10	3.790811270840849e-10	3.0965649788599924e-10	3.940722161327687e-10	3.8275077190221056e-10	5.472858905844293e-10	3.289166839669078e-10	2.2404272113346432e-10	3.85073181941093e-10	4.904070545234915e-10	3.0034075356823284e-10
TraesCS1A01G028500.3	chr1A	1.647726409924543e-10	4.228440685221372e-10	4.742026055066541e-10	3.9397650464296104e-10	5.114929733271076e-10	3.7807501898054425e-10	3.8411859699565864e-10	7.329497293980704e-10	6.1276686521299e-10	5.341001305405818e-10	2.0298717861002492e-10	4.937661000331391e-10	1.5115589491021625e-10	3.761168859882321e-10	3.7840385095095867e-10	3.091032575886021e-10	3.9336815653273565e-10	3.820669394868671e-10	5.463080954761876e-10	3.2832903292357745e-10	2.2364244062097472e-10	3.843852002479873e-10	4.895308806129083e-10	2.9980415702025484e-10
TraesCS1A01G028600.1	chr1A	3.620747097074796e-10	9.29166046253356e-10	1.0420223266265121e-09	8.657318817673144e-10	1.1239649296105486e-09	8.30789637894432e-10	8.440699175709427e-10	1.6105984519246439e-09	1.3465062130703842e-09	1.1736423507896802e-09	4.460481019596622e-10	1.0850115423050136e-09	3.3215299846226996e-10	8.264867971407143e-10	8.315122198686798e-10	6.792297045609328e-10	8.643950854151758e-10	8.395615641668791e-10	1.2004683780570403e-09	7.214768093071097e-10	4.914363894296012e-10	8.446557569106083e-10	1.0757049861140635e-09	6.587956742598758e-10
TraesCS1A01G028600.2	chr1A	3.463407765066717e-10	8.887891955309729e-10	9.967413135059393e-10	8.281115585789279e-10	1.0751231059525793e-09	7.94687727664041e-10	8.073909136421624e-10	1.540609999882854e-09	1.28799387226636e-09	1.122641797992489e-09	4.266651104045481e-10	1.0378624355846777e-09	3.177193112973323e-10	7.90571866578269e-10	7.953789098851159e-10	6.497138214764716e-10	8.268328526262116e-10	8.03078470445035e-10	1.1483021019719437e-09	6.901250810056742e-10	4.700810527644736e-10	8.079512953710378e-10	1.0289602951938708e-09	6.301677506466516e-10
TraesCS1A01G028600.3	chr1A	2.316394716212544e-10	5.944395624218635e-10	6.666400460620994e-10	5.53857174449631e-10	7.190633188000028e-10	5.315026639274389e-10	5.39998802665587e-10	1.0303900393906133e-09	8.614354423769268e-10	7.508447475629707e-10	2.853619539985926e-10	6.941426551596122e-10	2.124968770212513e-10	5.287498956949743e-10	5.319649400882154e-10	4.345412856950639e-10	5.530019509491418e-10	5.37114556479923e-10	7.680068597329398e-10	4.6156912486350074e-10	3.1439938369321094e-10	5.403735969040597e-10	6.881887299036151e-10	4.2146849200048744e-10
TraesCS1A01G028600.4	chr1A	1.6481470702283278e-10	4.229520195225258e-10	4.743236682091067e-10	3.940770858287264e-10	5.116235561643115e-10	3.78171540558022e-10	3.8421666148302033e-10	7.331368495740719e-10	6.129233030136571e-10	5.342364849267294e-10	2.0303900071332083e-10	4.938921572452997e-10	1.5119448462043075e-10	3.76212907659406e-10	3.7850045647839064e-10	3.091821708532405e-10	3.934685824087971e-10	3.8216448019135697e-10	5.464475665243051e-10	3.284128544790851e-10	2.236995359594023e-10	3.844833327984719e-10	4.896558565844715e-10	2.998806962484959e-10
TraesCS1A01G028700.1	chr1A	3.249014632151163e-10	8.337710420079183e-10	9.35040668533e-10	7.768494943085664e-10	1.0085704426248656e-09	7.45494677587203e-10	7.57411506305481e-10	1.4452425967698238e-09	1.2082640049846478e-09	1.0531476152279816e-09	4.002535308475479e-10	9.73616295888193e-10	2.9805173440273144e-10	7.416335980381949e-10	7.461430739938883e-10	6.094949991102884e-10	7.756499432789422e-10	7.53366013542801e-10	1.0772194856948681e-09	6.474047060868528e-10	4.409819236804121e-10	7.579371990798262e-10	9.652652190444767e-10	5.911588762986203e-10
TraesCS1A01G028700.2	chr1A	3.249014632151163e-10	8.337710420079183e-10	9.35040668533e-10	7.768494943085664e-10	1.0085704426248656e-09	7.45494677587203e-10	7.57411506305481e-10	1.4452425967698238e-09	1.2082640049846478e-09	1.0531476152279816e-09	4.002535308475479e-10	9.73616295888193e-10	2.9805173440273144e-10	7.416335980381949e-10	7.461430739938883e-10	6.094949991102884e-10	7.756499432789422e-10	7.53366013542801e-10	1.0772194856948681e-09	6.474047060868528e-10	4.409819236804121e-10	7.579371990798262e-10	9.652652190444767e-10	5.911588762986203e-10
TraesCS1A01G028800.1	chr1A	3.7403198575228044e-10	9.598511358457321e-10	1.0764344196842821e-09	8.943221003424805e-10	1.1610831225351147e-09	8.582259121470292e-10	8.719447642114662e-10	1.6637873926892467e-09	1.3909736836063125e-09	1.2124011074495942e-09	4.6077854333376456e-10	1.1208433255676937e-09	3.431221299294481e-10	8.537809729443184e-10	8.589723569095343e-10	7.016608129966067e-10	8.92941157181494e-10	8.672875254400611e-10	1.2401130463938024e-09	7.453031002286074e-10	5.076657487560712e-10	8.72549950504991e-10	1.1112294265593135e-09	6.805519624596516e-10
TraesCS1A01G028900.1	chr1A	1.6147553962191997e-10	4.143829565957313e-10	4.6471380899826686e-10	3.8609303281418747e-10	5.012579963720881e-10	3.7050973595942276e-10	3.7643238194822175e-10	7.18283401646233e-10	6.005053971747112e-10	5.234127842566281e-10	0.19892540434952014	4.838858379014105e-10	1.481312646969053e-10	3.685907852180824e-10	3.7083198800046424e-10	3.0291809985796475e-10	3.8549685775269093e-10	3.7442177811644456e-10	5.353764677528021e-10	3.2175916733231027e-10	2.191673542653774e-10	3.766936504681377e-10	4.797353652429652e-10	2.9380507433850886e-10
TraesCS1A01G029000.1	chr1A	1.5940227343418173e-09	4.090624840666008e-09	4.587471131790298e-09	3.811357889360794e-09	4.948220912334834e-09	3.6575257391747466e-09	3.7159917605654095e-09	7.09060997476948e-09	5.9279520442086296e-09	5.166924225822221e-09	1.9637130019606854e-09	4.7767298269872574e-09	1.4622933240943883e-09	3.6385826155602306e-09	3.6607068840144597e-09	2.990287810449736e-09	3.80547268467965e-09	3.6961438738507293e-09	5.28502498290297e-09	3.1762793851717936e-09	2.1635335366740217e-09	3.7185709001768254e-09	4.7357580005959886e-09	2.90032762272928e-09
TraesCS1A01G029100.1	chr1A	1.4343017271904821e-10	3.6807444133964307e-10	4.127806728227218e-10	3.429459998202892e-10	4.452409396790953e-10	3.2910418226300205e-10	3.3436495512752516e-10	6.380131170365784e-10	5.333971512784926e-10	4.6491986479848914e-10	1.7669490464209678e-10	4.2981017105750706e-10	1.315771597996506e-10	3.2739967991599495e-10	3.2939042168981475e-10	2.6906611047148253e-10	3.424164490769292e-10	3.3257904219274503e-10	4.755465714453905e-10	2.858016331914189e-10	1.9467475724349675e-10	3.345970261212207e-10	4.261235259367641e-10	2.6097149238066173e-10
TraesCS1A01G029100.2	chr1A	1.731239494257002e-10	4.442754251728972e-10	4.982370094864765e-10	4.139447426095794e-10	5.374173959494792e-10	3.9723730875992823e-10	4.0358719845239764e-10	7.700984284745616e-10	6.43824236498926e-10	5.611703704633949e-10	2.1327534615019517e-10	5.18792056832888e-10	1.588170545074356e-10	3.951799300890033e-10	3.975828071938472e-10	3.247697943770832e-10	4.133055610874922e-10	4.0143155508435115e-10	5.739970818116662e-10	3.449700056300822e-10	2.3497749593804743e-10	4.038673141784968e-10	5.143421802739006e-10	3.149993797815389e-10
TraesCS1A01G029200.1	chr1A	1.1219659496149392e-10	2.879219778362415e-10	3.2289291073602205e-10	2.682655448715887e-10	3.482845793353507e-10	2.5743794305974493e-10	2.615531218333317e-10	4.990783871709489e-10	4.1724375702198384e-10	3.636781910771636e-10	1.382175470618835e-10	3.36214038917247e-10	1.0292471259267073e-10	2.5610461579803496e-10	2.5766185054324925e-10	2.104738552714882e-10	2.6785130992270737e-10	2.60156112080213e-10	3.719908095369661e-10	2.235650245037498e-10	1.5228207896297858e-10	2.6173465668606436e-10	3.3333020337875827e-10	2.041419338208826e-10
TraesCS1A01G029300.1	chr1A	2.30911237601767	0.9356380239205391	1.7488006482931626	6.102334120963318	7.545291677695065	8.923481472361823	1.983214729425435	3.784239322542013	3.6156936418743935	1.9696953236789536	4.491549882269886	5.098655519757591	2.229777094457224	1.1096581021613703	1.9537093406746193	1.8238954267824188	2.321109092602274	2.2544251040612386	4.432376939189226	5.085515092652955	3.793922231738468	0.8505390898382652	2.52746120738095	3.7591784043045418
TraesCS1A01G029400.1	chr1A	2.1555232300782505e-10	5.531562806242849e-10	6.203425069699736e-10	5.153923022340973e-10	6.691250315511212e-10	4.945902919418272e-10	5.024963816457398e-10	9.58830397255973e-10	8.016095418712838e-10	6.986992692681133e-10	2.65543828311879e-10	6.459350851184772e-10	1.977391640261193e-10	4.920287009355236e-10	4.950204634476982e-10	4.0436279239804437e-10	5.145964732204535e-10	4.998124437093639e-10	7.146694885060778e-10	4.29513572953114e-10	2.9256463517628676e-10	5.028451467684856e-10	6.403946545046327e-10	3.921978922221564e-10
TraesCS1A01G029500.1	chr1A	4.5495363453730513e-10	1.167514489407846e-09	1.309320513301671e-09	1.08780827709029e-09	1.412282924239329e-09	1.0439026951132997e-09	1.060589614537696e-09	2.0237470329680336e-09	1.6919102028925264e-09	1.4747035316828749e-09	5.604677701156291e-10	1.3633372656306126e-09	4.1735644556605166e-10	1.0384960953501716e-09	1.0448106328582496e-09	8.534648084793115e-10	1.086128567508991e-09	1.0549247842914344e-09	1.5084109359236806e-09	9.065490845627741e-10	6.174990009534735e-10	1.0613257326086078e-09	1.351643403975599e-09	8.277890677979975e-10
TraesCS1A01G029600.1	chr1A	5.795145488406069e-10	1.4871661225042492e-09	1.667796955453385e-09	1.3856372937083674e-09	1.7989492544843879e-09	1.3297108836317526e-09	1.3509664838680347e-09	2.5778249908273247e-09	2.1551351686754893e-09	1.878459884612208e-09	7.139172044830141e-10	1.7366028545151162e-09	5.316236950253388e-10	1.3228240209173192e-09	1.330867403972941e-09	1.0871333601724802e-09	1.3834976995469105e-09	1.3437506902240084e-09	1.9213959767286383e-09	1.15475148204181e-09	7.865629105502504e-10	1.3519041423443577e-09	1.7217073521017731e-09	1.0544279059294062e-09
TraesCS1A01G029700.1	chr1A	1.7215445530891627e-09	4.41787482791929e-09	4.954468822333522e-09	4.116266520509657e-09	5.344078585321621e-09	3.950127798308726e-09	4.013271101410641e-09	7.657858772751039e-09	6.40218820774532e-09	5.580278163887998e-09	2.12081004211754e-09	5.158868213146238e-09	1.5792767900219394e-09	3.929669224805049e-09	3.953563434735616e-09	3.2295108352857144e-09	4.109910499454022e-09	3.9918353837587875e-09	5.707826981535208e-09	3.4303817359855368e-09	2.3366162196079435e-09	4.016056572190972e-09	5.1146186406436665e-09	3.1323538325476226e-09
TraesCS1A01G029800.1	chr1A	23.67123760551397	24.85054590842659	20.127529592278208	1.2863332889456012	10.020147349148065	4.937659749120322	6.270736097208275	4.786161735362481	18.006154336284393	8.719184632818834	13.917815902059113	6.448585268044944	5.428763966193941	2.4560432667311773	4.941954294655009	5.046110681143151	7.706082187760638	7.484691345795175	12.485871523891962	8.575954341035837	10.952888530142427	5.020070716493732	7.991591627604048	10.767466300361312
TraesCS1A01G029900.1	chr1A	1.900998843958881e-10	4.878395348850806e-10	5.470924052930126e-10	4.5453473062164935e-10	5.901146847749139e-10	4.3618902366483275e-10	4.431615615515284e-10	8.456116135988338e-10	7.069554116326545e-10	6.161967937155475e-10	2.341883880430146e-10	5.696630094021906e-10	1.743901049052495e-10	4.339299055659285e-10	4.365684004787562e-10	3.5661559576918225e-10	4.5383287317292647e-10	4.407945432595834e-10	6.302812479610432e-10	3.7879656978638877e-10	2.5801857548674287e-10	4.4346914445571685e-10	5.647767933572954e-10	3.4588712815234343e-10
TraesCS1A01G030000.1	chr1A	35.28469352363027	20.121899523228958	7.521966839287585	6.249392493777009	4.056739820849469	2.9985787942626966e-09	15.232557321153704	29.06575951777307	9.719921372894353	4.236041120547781	8.049633258635003	7.832289801202943	51.550279837441295	11.932194005427531	12.00474727446561	2.4515517474334877e-09	6.239742664234277	12.12095764602251	4.3328646158221416	13.020173595666549	15.96372417419644	6.097251883905364	3.882554636116144e-09	7.1333968882402985
TraesCS1A01G030100.1	chr1A	0.9545281532138429	0.8165121055329899	9.156854649458209e-10	1.5215376500373794	0.9876931845735029	0.7300630487171366	7.417332001128588e-10	1.4153262901199293	1.1832531187306532e-09	1.031347616338395	0.7839366842698171	1.9069251659902682	1.1675284305693139	7.262818922138459e-10	7.306980226840098e-10	0.5968785433431294	7.595941041376333e-10	7.377714484522155e-10	1.0549212026693633	1.9020105738147473	4.318536630620891e-10	0.7422480118667499	0.9452843726758782	2.8946098754073066
TraesCS1A01G030200.1	chr1A	2.980513422938301e-10	7.648675256092952e-10	8.577681479109283e-10	7.126500208638602e-10	9.252213617246572e-10	6.838863916739484e-10	6.948184039838369e-10	1.3258065742297504e-09	1.1084120858284832e-09	9.661146405623266e-10	3.67176253829214e-10	8.931558540765646e-10	2.734204968874549e-10	6.803443948762204e-10	6.844812040747257e-10	5.591258371339533e-10	7.115496017060288e-10	6.91107234030261e-10	9.881971920940456e-10	5.939026551221498e-10	4.0453881918420077e-10	6.953006530801544e-10	8.85494917008945e-10	5.423050264105994e-10
TraesCS1A01G030300.1	chr1A	3.043749209846469e-10	7.810952666052492e-10	8.759669063531688e-10	7.277698940080724e-10	9.448512350285753e-10	6.983960039442586e-10	7.095599542805237e-10	1.3539354265825741e-09	1.1319286081586493e-09	9.866121223281469e-10	3.749664148015453e-10	9.121054125081752e-10	2.7922149752863146e-10	6.947788586996197e-10	6.990034361272306e-10	5.709884786573046e-10	7.26646127909127e-10	7.05770046633449e-10	1.009163186268601e-09	6.0650313578245e-10	4.1312167956293204e-10	7.100524349701153e-10	9.042819378790076e-10	5.538107907616023e-10
TraesCS1A01G030400.1	chr1A	16.16192730676918	9.216706874035005	10.336165833267861	5.009364681447126	9.290818125618966	8.927618460007572	4.884022551093144	3.994015355686887	14.469479608326035	8.731311453506999	13.642206460443287	16.14388522979679	23.0631520103307	17.07957764674129	7.560708933596199	5.614587683603382	2.1435555463268385	2.775963410818321	6.946242850565765	15.505897972714592	9.749441806837146	9.076622990698658	10.670275329074865	10.346787694982126
TraesCS1A01G030500.1	chr1A	0.36146652168601656	4.6380264850776417e-10	0.5201360051044224	1.2964165277483104	1.6831154564644046	4.976364807914492	4.213260534795607e-10	1.607893080188963	1.3442444451875168	5.858354735324747e-10	0.8905977222764878	1.0831890150599814	0.3315950708590939	4.125492607228145e-10	0.8301155032290869	0.339044390941548	0.8629431344153787	4.1907566318856254e-10	5.992259569080915e-10	0.3601324614448403	0.49061090861763407	0.42161848154469084	5.369490454203178e-10	1.3153781494949797
TraesCS1A01G030600.1	chr1A	0.6481718953124755	8.316782432076975e-10	9.32693678903148e-10	7.74899570879077e-10	4.024155562242199	1.487246912757451	7.555103730065213e-10	1.4416149812516752	1.2052312138074774e-09	1.0505041734691787	1.1977466356312936	1.9423449607400876	2.9730361257943137e-10	1.4795441365850466	2.232810675482005	2.431860569347208	0.7737030315444151	0.7514750353446203	2.14903124412241	1.2915593891945512	3.5190003311747295	1.5120694932978163	9.628423645790036e-10	0.5896750443674655
TraesCS1A01G030700.1	chr1A	7.213175502047665	5.695584222352631	3.1936842438153024	4.643403359639644	2.5836220070867437	5.729128199730661	5.17396360366863	4.936307761924476	4.126893989694371	3.597085194638849	5.468354212935344	4.156801848553404	5.5990689807792124	1.8998185987878409	2.548493834802755	5.204411531384829	7.285509588220481	5.789619433469207	3.6793040285531786	6.633742077018182	5.648245052071729	1.9415830018138651	5.769606331589002	7.5717620581241984
TraesCS1A01G030800.1	chr1A	6.016581616108444e-10	1.5439916686577201e-09	1.7315245185228993e-09	1.4385833599171683e-09	1.86768822879367e-09	1.3805199681706153	1.4025877567837753e-09	2.676325296042252	2.2374842291747393e-09	1.950237009746505e-09	1.4823928540386384	1.8029595357543475	5.519373683674067e-10	1.3733699527510658e-09	1.3817206784956722e-09	1.1286734046897886e-09	1.4363620105268018e-09	1.3950962431589427e-09	1.994813716752752e-09	1.1988752572176854e-09	8.166179705060382e-10	1.4035612437759687e-09	3.5749897319671313	1.094718255712946
TraesCS1A01G030800.2	chr1A	6.436482626205744e-10	1.6517478170186775e-09	1.8523687022682662e-09	1.538982996202514e-09	1.998035363405392e-09	1.4768673223985768e-09	1.5004752373170395e-09	2.8631077166317448e-09	2.393639658927712e-09	2.0863452756311062e-09	7.929249908216128e-10	1.9287892122929603e-09	5.904574239862686e-10	1.4692183058579456	1.4781518325282713e-09	1.2074442305405215e-09	1.5366066174429297e-09	1.492460886250793e-09	2.134033019018647e-09	1.282545514451223e-09	8.736102515981843e-10	1.501516664577881e-09	1.9122452544779414e-09	1.1711193292177054e-09
TraesCS1A01G030900.1	chr1A	2.6062947412532743e-10	6.688345016026378e-10	7.500709763322854e-10	6.231731712519667e-10	8.090550946691998e-10	5.980209626022496e-10	6.075804049370167e-10	1.1593447879619054e-09	9.692452878096469e-10	8.448140135074685e-10	3.2107539999760906e-10	7.810155752643678e-10	2.390911571490623e-10	5.949236815913982e-10	5.985410932684118e-10	4.889247328349386e-10	6.222109153392241e-10	6.043351913239989e-10	8.641239879191372e-10	5.193351437200551e-10	3.537469044622442e-10	6.080021051964532e-10	7.743165079698729e-10	4.742158608015173e-10
TraesCS1A01G030900.2	chr1A	2.4993387820690513e-10	6.413871701392696e-10	7.192898987127645e-10	5.975996690635391e-10	7.758534531535454e-10	5.734796455152041e-10	5.826467917262837e-10	1.111768114510894e-09	9.294698327156388e-10	8.101449134564458e-10	3.0789925117850465e-10	7.48964607018908e-10	2.2927944106009575e-10	5.705094693387121e-10	5.739784312914658e-10	4.688604580844533e-10	5.966769017790392e-10	5.795347537396613e-10	8.28662453765274e-10	4.980229001140442e-10	3.3922999703948075e-10	5.830511864388751e-10	7.425404530551201e-10	4.547552021700962e-10
TraesCS1A01G030900.3	chr1A	2.243152214761765e-10	5.756438709067872e-10	6.455614344597189e-10	5.363446647641144e-10	6.963271263014621e-10	5.146969855336248e-10	5.229244833318244e-10	9.978099512792353e-10	8.341975600780038e-10	7.271036523481583e-10	2.7633904301392553e-10	6.721944336100901e-10	2.0577790002023187e-10	5.120312575753625e-10	5.151446449012703e-10	4.2080144657127973e-10	5.355164827294157e-10	5.201314346454292e-10	7.437231126044833e-10	4.469746876284143e-10	3.0445833299269593e-10	5.232874268838132e-10	6.66428766588386e-10	4.0814200389345324e-10
TraesCS1A01G031000.1	chr1A	4.753896961770516e-10	1.2199580710380954e-09	1.3681338795103614e-09	1.1366715354868345e-09	1.4757212588332898e-09	1.090793758737682e-09	1.108230237871127e-09	2.114651722961443e-09	1.7679091148044882e-09	1.5409457374506624e-09	5.856434210560219e-10	1.4245770102576136e-09	4.3610367912976973e-10	1.0851442999277565e-09	1.09174248013686e-09	8.918015929544499e-10	1.1349163750333272e-09	1.1023109491233765e-09	1.576167244532918e-09	9.472703615571254e-10	6.452364376678783e-10	1.108999421628582e-09	1.4123578720481409e-09	8.649725237152861e-10
TraesCS1A01G031100.1	chr1A	4.973645665704438e-10	1.276350585878069e-09	1.4313758153891148e-09	1.1892141334292152e-09	1.5439364171768937e-09	1.141215658217082e-09	1.1594581379268033e-09	2.2124014173972572e-09	1.8496306455350504e-09	1.6121758948058548e-09	6.127147656348826e-10	1.4904280276809238e-09	4.5626255489848027e-10	1.135305053391289e-09	1.1422082342263916e-09	9.330250872358576e-10	1.1873778407513546e-09	1.1532652302847037e-09	1.6490255146962272e-09	9.910578975304904e-10	6.750624671440516e-10	1.160262877173817e-09	1.4776440602784093e-09	9.049558453045906e-10
TraesCS1A01G031200.1	chr1A	2.5645977905880732	1.7949112253759132	6.709735674882885e-10	0.5574575466719832	10.856064299183153	0.5349577196991948	1.630527262763434	2.074176266679298	2.6011057190734217	10.58015903304608	11.201461490344647	6.986549585132888	7.699615986236335	5.32187056500273	6.960499005351648	1.7494641582302777	2.226387053348591	5.406060921124012	5.410995243290124	2.7874174457399246	3.164431500327201	9.789953724736394	13.853246589651674	15.695705824403355
TraesCS1A01G031300.1	chr1A	72.00287857432777	61.890910218770074	47.278025444226444	7.521602332573736	16.275279937432675	8.02002124804495	48.889333937869196	41.97932868271574	51.99394862944267	41.92006471361049	53.39343094708225	50.275921948330726	50.661694536758056	35.10532875514723	42.54308244009364	13.11387724193499	15.854419225853343	13.777991647514458	25.49516654023059	19.501358001697096	23.24597890426215	40.76938859235882	55.03684108538758	83.31179319170361
TraesCS1A01G031400.1	chr1A	2.541650422867858e-10	6.522452993975329e-10	7.314668536909728e-10	6.077165138547722e-10	7.889879801163811e-10	5.831881591991229e-10	5.925104972555082e-10	1.130589385740803e-09	9.452049519309038e-10	8.238599651409447e-10	3.13111718816566e-10	7.616439291062359e-10	0.46632188705066274	1.1603354016052805	0.5836953895702529	0.9535957195572254	0.6067781255261712	5.893457751612383e-10	8.42690991368387e-10	1.0129079934155694	0.34497286741307476	0.5929217386132424	7.55111019780069e-10	1.387361442043586
TraesCS1A01G031500.1	chr1A	9.157151878133845e-10	2.349933419106005e-09	2.635355756560384e-09	2.189503468356201e-09	2.8425949921923515e-09	2.101131807611025e-09	2.1347186709631074e-09	4.073329134442042e-09	3.4054192594390003e-09	2.9682330658978716e-09	1.1280904479348618e-09	2.7440788367799138e-09	8.400408457563509e-10	2.09024958766226e-09	2.1029592737955408e-09	1.7178249123860183e-09	2.1861226060925648e-09	2.1233166934887165e-09	3.0360781816676634e-09	1.8246711361625197e-09	1.2428809678765657e-09	2.1362003043569e-09	2.72054183012961e-09	1.6661456556104376e-09
TraesCS1A01G031600.1	chr1A	3.2457476491122985e-10	8.329326598641196e-10	9.341004566993822e-10	7.760683485123788e-10	1.0075562943668217e-09	7.447450600129574e-10	7.566499059974815e-10	1.4437893613784012e-09	1.2070490587755128e-09	1.0520886432669682e-09	3.998510637476509e-10	9.726372950879031e-10	2.977520343178619e-10	7.408878628968796e-10	7.453928044373334e-10	6.088821333494938e-10	7.748700036678021e-10	7.526084811008273e-10	1.076136308735899e-09	6.467537209625825e-10	4.4053850294267414e-10	7.571750701717519e-10	9.642946155059706e-10	5.905644480670481e-10
TraesCS1A01G031700.1	chr1A	2.9001761339103147e-10	7.442511502559449e-10	8.346477126572645e-10	6.93441125422786e-10	9.002827805460951e-10	6.654527962110387e-10	6.76090145116348e-10	1.2900705479701886e-09	1.0785357492832414e-09	9.400738146711589e-10	3.572793197637366e-10	8.690815722955252e-10	2.6605067217350734e-10	6.620062710251093e-10	6.660315759325499e-10	5.440550598527147e-10	6.923703671586964e-10	6.724790066979089e-10	9.615611491804595e-10	5.778944973021457e-10	3.936348078854352e-10	6.765593955847324e-10	8.616271294884883e-10	5.276876402539795e-10
TraesCS1A01G031800.1	chr1A	1.4185436330662184e-10	3.640305560249909e-10	4.082456181883258e-10	3.3917819054957623e-10	4.4034925719525553e-10	3.254884474545753e-10	3.30691422331134e-10	6.310035244521292e-10	5.275369320818491e-10	4.598119779077124e-10	1.7475362904725942e-10	4.250880201999207e-10	1.3013157465573002e-10	3.238026717868366e-10	3.257715420843454e-10	0.2661099899897187	3.3865445776648173e-10	0.328925130829814	4.703219332181286e-10	2.826616460106738e-10	1.9253594426565125e-10	3.309209436544967e-10	4.214418787610141e-10	2.5810430393437896e-10
TraesCS1A01G031900.1	chr1A	5.292066623562882e-11	1.3580646450280625e-10	1.5230148441471192e-10	1.265349573892222e-10	1.6427817603865956e-10	1.2142781575258402e-10	1.233688550724642e-10	2.354042986951094e-10	1.9680470349245799e-10	1.7153900413624063e-10	0.06519417711200766	1.5858476759815061e-10	0.09709464653731317	0.24159782933661877	0.24306685609757342	9.927588845250783e-11	1.2633957187435513e-10	0.12270991641991012	0.17545988361473386	1.0545070505734703e-10	0.21548432231618722	1.2345448106989215e-10	0.3144490517584009	9.628926036604299e-11
TraesCS1A01G032000.1	chr1A	1.490600802143699e-10	3.825220642968676e-10	4.2898310052529925e-10	3.56407283581418e-10	4.627174946884341e-10	3.4202214831811877e-10	3.474894165386725e-10	6.630563472134934e-10	5.54334005519394e-10	4.831688551045947e-10	1.836305162304497e-10	4.4668103900481165e-10	1.3674181395941522e-10	3.4025074100713306e-10	3.423196231876832e-10	2.7962746784394897e-10	3.5585694696265484e-10	3.45633403119267e-10	4.942126802299013e-10	2.97019891709669e-10	2.0231611229576976e-10	3.4773059676093617e-10	4.42849686040493e-10	2.7121512057385324e-10
TraesCS1A01G032100.1	chr1A	5.434168412528923e-10	1.394531195681594e-09	1.563910613110329e-09	1.2993265531911795e-09	1.6868934928414208e-09	1.2468837747186636e-09	1.2668153729200258e-09	2.4172534004895957e-09	2.0208927423438513e-09	1.7614514406212116e-09	6.694476143047791e-10	1.6284306228365649e-09	4.985090877594506e-10	1.2404258916682605e-09	1.24796825591402e-09	1.0194162990169554e-09	1.297320233413517e-09	1.2600490479036577e-09	1.8017130623532854e-09	1.0828225176722025e-09	7.375682511388711e-10	1.2676946250602814e-09	1.6144629547486323e-09	9.887480532031638e-10
TraesCS1A01G032200.1	chr1A	5.189543467913473e-10	1.3317548717602359e-09	1.4935094922629188e-09	1.2408359688031522e-09	1.6109561651893954e-09	1.190753958493386e-09	1.2097883143319862e-09	2.3084381348727006e-09	1.9299200787013627e-09	1.6821578066382632e-09	6.39311708837683e-10	1.5551250642522823e-09	4.760681641947165e-10	1.1845867840047373e-09	1.1917896205995627e-09	9.735261762316263e-10	1.2389199656714294e-09	1.2033265827247148e-09	1.7206070080994395e-09	1.0340780956548041e-09	7.043658218271535e-10	1.2106279859900438e-09	1.5417861657888868e-09	9.442384945380695e-10
TraesCS1A01G032300.1	chr1A	4.0885320291857886e-10	1.0492102979542327e-09	1.1766471237334206e-09	9.775807125972904e-10	1.2691763581352804e-09	9.381240812956126e-10	9.531201159144969e-10	1.8186808358338442e-09	1.5204690170389455e-09	1.325271888193793e-09	5.036755958163887e-10	1.2251903609435332e-09	3.750657354390293e-10	9.332653320467975e-10	9.389400177491172e-10	7.669832572717815e-10	9.760712079133996e-10	9.480293026659564e-10	1.35556372265719e-09	8.146885060130313e-10	5.549278545617345e-10	9.537816431739167e-10	1.2146814377716118e-09	7.439092382554518e-10
TraesCS1A01G032400.1	chr1A	4.315369033478851e-10	1.1074218318647951e-09	1.2419290162934966e-09	1.0318181451812309e-09	1.3395918913740695e-09	9.901724093354093e-10	1.006000443201197e-09	1.9195835827417376e-09	1.6048265895083524e-09	1.3987996734344915e-09	5.31620164300854e-10	1.2931654946055075e-09	3.958748638089755e-10	9.850440904424421e-10	9.910336149905454e-10	8.095364727487587e-10	1.0302248912401458e-09	1.0006271850999634e-09	1.4307721377511383e-09	8.598884699161608e-10	5.857159641396918e-10	1.0066986728419884e-09	1.2820735228886198e-09	7.851822775436888e-10
TraesCS1A01G032500.1	chr1A	1.5979683351693962e-09	4.100750149677558e-09	4.598826258354135e-09	3.82079194354238e-09	4.96046898390002e-09	3.6665790207073574e-09	3.7251897599727487e-09	7.108160989558513e-09	5.942625192832909e-09	5.1797136422227706e-09	1.968573677708113e-09	4.788553415667918e-09	1.465912862025315e-09	3.647589008173003e-09	3.6697680396679604e-09	2.997689512950849e-09	3.814892171522916e-09	3.7052927448256066e-09	5.298106727910156e-09	3.1841414628578623e-09	2.168888817705393e-09	3.727775283593105e-09	4.7474801738647904e-09	2.907506651498412e-09
TraesCS1A01G032600.1	chr1A	4.1543063539796395e-10	1.066089485501759e-09	1.1955764532658114e-09	9.933075580380447e-10	1.2895942532146768e-09	9.53216167545542e-10	9.684534511126067e-10	1.8479388930383783e-09	1.5449295868111294e-09	1.3465922210154438e-09	5.11778485066974e-10	1.2449006305854822e-09	3.8109961149178076e-10	9.482792530900214e-10	9.540452303898687e-10	7.793221127619968e-10	9.91773769173268e-10	9.632807393240317e-10	1.3773713758530906e-09	8.277948204598304e-10	5.638552653494072e-10	9.691256207024547e-10	1.2342226449429698e-09	7.558768900935382e-10
TraesCS1A01G032600.2	chr1A	4.935620851746453e-10	1.266592553875943e-09	1.420432575210299e-09	1.1801222822562092e-09	1.5321326219385381e-09	1.1324907678637403e-09	1.150593779074152e-09	2.1954870334722015e-09	1.8354897384590942e-09	1.5998503910229353e-09	6.080304019832398e-10	1.4790333179891737e-09	4.527743090659231e-10	1.1266253511482365e-09	1.1334757553714495e-09	9.258918679144825e-10	1.1783000285131944e-09	1.1444482178207534e-09	1.6364182859905988e-09	9.834810022894315e-10	6.699014391077819e-10	1.1513923658804392e-09	1.466347087340501e-09	8.980372226340661e-10
TraesCS1A01G032700.1	chr1A	1.356543827292364e-10	3.481199958961407e-10	3.904025653236123e-10	3.2435384433517994e-10	4.211030614615692e-10	3.112624342016752e-10	3.162380044187835e-10	6.034244672791846e-10	5.044800541930018e-10	4.397151316364782e-10	1.6711573141291818e-10	4.0650884217899544e-10	1.244439580286252e-10	3.09650338159675e-10	3.1153315571041316e-10	2.5447921059721435e-10	0.32385300248717686	3.145489113069017e-10	4.49765731892352e-10	2.7030744925290534e-10	1.841208410071399e-10	3.1645749413145924e-10	4.0302206140814776e-10	0.24682342685017672
TraesCS1A01G032700.2	chr1A	1.482726705118135e-10	3.8050139193149596e-10	4.2671699778940533e-10	3.545245625151863e-10	4.602731900541129e-10	3.4021541671239594e-10	3.456538040948531e-10	6.595537528207716e-10	5.514057367718179e-10	4.806165161823608e-10	1.8266048823933798e-10	4.4432144692922347e-10	1.360194754842047e-10	3.384533668584964e-10	3.405113201713036e-10	2.781503360661789e-10	3.539771330489798e-10	3.438075950642042e-10	4.916020023141256e-10	2.954508844728012e-10	2.0124737766490097e-10	3.4589371028286963e-10	4.4051033308253905e-10	2.6978242701087697e-10
TraesCS1A01G032800.1	chr1A	4.0526001720554684e-10	1.0399893662710193e-09	1.1663062199466861e-09	9.689892939052867e-10	1.2580222658478393e-09	9.298794252139185e-10	9.447436679403583e-10	1.8026974512125798e-09	1.5071064519174484e-09	1.3136248031751408e-09	4.992490682950895e-10	1.2144228373696418e-09	3.7176948917653943e-10	9.250633768373469e-10	9.306881908511338e-10	7.602426636736616e-10	9.674930554270297e-10	9.396975950467956e-10	1.343650419382111e-09	8.075286572470662e-10	5.500508991544124e-10	9.453993814008878e-10	1.204006271337963e-09	7.373714295074441e-10
TraesCS1A01G032900.1	chr1A	1.4622405603815086e-10	3.7524418130684786e-10	4.2082124765007266e-10	3.4962626165144314e-10	4.539138096252793e-10	3.3551481865589404e-10	3.408780663712323e-10	6.504410056130553e-10	5.437872203634191e-10	4.739760614853905e-10	1.801367532942418e-10	4.3818246431026935e-10	1.3414015770288274e-10	3.337771142246644e-10	3.358066337544408e-10	2.7430726234023623e-10	3.490863957633654e-10	3.3905736555142586e-10	4.848097662685623e-10	2.913687771222144e-10	1.984668363200405e-10	3.411146578871154e-10	4.344240068496886e-10	2.6605496878943564e-10
TraesCS1A01G033000.1	chr1A	0.10179426175560001	2.6122722492427206e-10	0.29295581996736	0.24339324294145717	0.3159932941500532	2.335695244979143e-10	2.3730316351765857e-10	4.528062188239735e-10	3.7855890537756154e-10	3.299596832951749e-10	1.254026751488612e-10	3.050418763686281e-10	9.338202400791979e-11	2.3235981698232318e-10	2.337726723471864e-10	1.9095972299466146e-10	2.4301741363848286e-10	2.3603567784761047e-10	3.37501595407711e-10	2.02837141437177e-10	1.3816321071475544e-10	2.374678673244425e-10	3.0242541631052903e-10	0.18521486729422756
TraesCS1A01G033100.1	chr1A	0.7068385484930245	0.6046361540607432	0.6780751132237215	5.633576442303363e-10	0.7313976173356341	1.0812393613915483	5.492615558499967e-10	1.0480646141070573	8.762118897461661e-10	1.5274484032878113	3.7733390350796765	0.7060494824322682	2.5937027575514437	0.5378196937136932	1.0821797728227367	4.419950960701252e-10	1.124975502237859	0.5463278359147751	0.7811807008088095	4.694865514578746e-10	0.3197923661420474	0.549642779590378	2.0999802819861704	1.714792244524112
TraesCS1A01G033200.1	chr1A	14.373582862557786	13.700470602902824	11.818866466672159	4.909669037849368	1.2748279068038217e-09	8.48071330837993	4.786821448250592	5.480337864005481	12.217916428522123	1.3311732274494936	3.0355105569718637	1.230646044443012	1.1302076268237347	1.87484218834441	0.9431210493056249	7.703985771967236	5.882505486840182	8.570257265701557	6.807999740788135	6.546530031325066	4.459191259351185	0.9580287634081653	1.2200903245810274e-09	7.472218111993375e-10
TraesCS1A01G033300.1	chr1A	1.5556125495277475	3.992055567396948e-09	4.476929658735111e-09	3.7195179402195696e-09	4.8289866734833925e-09	3.569392588833186e-09	3.626449790431303e-09	6.919751903088288e-09	5.785109826275891e-09	5.0424200276096374e-09	1.9163946163712713e-09	4.661627903445395e-09	1.4270573403812707e-09	3.5509059260286587e-09	3.572497079580376e-09	2.9182326824870915e-09	3.713774547699418e-09	3.607080166047097e-09	5.157674983314947e-09	3.0997425325170517e-09	2.111400198440913e-09	3.628966782100276e-09	4.6216433499792175e-09	2.830440212963834
TraesCS1A01G033400.1	chr1A	1.01506164686861e-09	2.604879025895807e-09	2.9212669943004258e-09	2.4270439389797506e-09	3.150989731911333e-09	2.3290847867386357e-09	2.366315507907218e-09	4.51524691789566e-09	3.774875122491345e-09	3.2902583513490555e-09	1.2504776191730778e-09	3.0417855030343383e-09	9.311773526072755e-10	2.3170219485878825e-09	2.3311105157639246e-09	1.9041927094845016e-09	2.4232962850554372e-09	2.3536765234426813e-09	3.3654640221316082e-09	2.0226307405575103e-09	1.3777218275990232e-09	2.3679578845465633e-09	3.0156949532097092e-09	1.8469067408889283e-09
TraesCS1A01G033500.1	chr1A	12.493329213897196	13.242472928305274	15.63252678559501	112.34446382818999	70.81972042054484	119.65048442562454	141.82363168699996	160.6797249868867	84.8417873564907	9.683907205776439	6.357076798856868	9.766473269285926	32.6386084604207	41.53678555940281	46.15539979612787	298.5633176505035	255.46456722586154	204.0420694691584	138.67354151695358	90.91882598585411	63.4041843355442	15.205935696771041	12.910270023466547	7.906656708649713
TraesCS1A01G033600.1	chr1A	0.6941711909931496	2.375201520980515	1.9977696870907304	1.1065232587547824	2.154870398025395	1.0618623119042447	2.6970907944981826	2.0585641872526796	8.605091677077044e-10	2.250112163608101	1.7103306794121038	0.693396265901224	1.0613419289904535	3.697269432468415	2.656964674412855	2.1703701854379145	3.3144439517250053	3.2192220842129786	3.8359052302935304	1.8442912563672755	2.8265518788720576	2.1591702006424653	4.124692452819438	1.6840612007154359
TraesCS1A01G033700.1	chr1A	0.25577623140016453	1.312759953485012	7.361037275654005e-10	6.115689164782573e-10	7.939894887066592e-10	5.868850730450762e-10	5.962665067468268e-10	1.1377563549055624e-09	9.511967424344274e-10	8.290825322733753e-10	3.150965791577169e-10	7.66472099813724e-10	0.2346389844890872	5.838454672352984e-10	5.873955182352837e-10	4.798203499334957e-10	6.106245789600865e-10	5.930817230227993e-10	0.8480329319398329	0.5096644818862796	0.3471597001700515	0.5966803550228351	0.7598977781930892	4.653853752794606e-10
TraesCS1A01G033800.1	chr1A	1.432074550595466e-10	3.6750289717607225e-10	4.1213970904504685e-10	3.4241347497584775e-10	4.4454957176033896e-10	3.285931509240844e-10	3.338457548866439e-10	6.370224134386956e-10	5.325688948324079e-10	4.641979395425908e-10	1.7642053367215563e-10	4.2914276395959166e-10	1.3137284743971327e-10	3.268912953198521e-10	0.32887894620861635	0.26864830622076524	3.4188474651625076e-10	3.320626151085948e-10	4.748081450922146e-10	2.8535784183553165e-10	1.9437246724777705e-10	3.340774655216536e-10	4.2546184344307346e-10	0.26056625740461203
TraesCS1A01G033900.1	chr1A	9.118350387124803e-10	2.339976074109793e-09	2.624188994880044e-09	2.1802259112868947e-09	2.8305500981576383e-09	2.092228706731317e-09	2.125673252865806e-09	4.056069265228305e-09	3.3909895168142587e-09	2.955655807144067e-09	1.1233104036639515e-09	2.7324513840816937e-09	8.364813506472138e-10	2.0813925978840302e-09	2.094048429415051e-09	1.7105459932657388e-09	2.176859374710817e-09	2.11431958885529e-09	3.02321344360975e-09	1.816939478805899e-09	1.2376145230974277e-09	2.127148608151998e-09	2.709014110510417e-09	1.6590857163917493e-09
TraesCS1A01G034000.1	chr1A	8.244945177630089e-10	2.1158404348272458e-09	2.372829895753603e-09	1.9713920117383418e-09	2.5594246098283624e-09	1.8918236581938345e-09	1.922064703740729e-09	3.667556883501456e-09	3.06618209183205e-09	2.6725470133563213e-09	1.0157136217038028e-09	2.4707223243037536e-09	7.563586159108906e-10	1.8820254908070155e-09	1.8934690779385134e-09	1.5467005916119322e-09	1.968347940351543e-09	1.9117985554400326e-09	2.733633611846364e-09	1.6429031302612727e-09	1.1190690706934596e-09	1.9233987414707718e-09	2.44953000030827e-09	1.5001694600323863e-09
TraesCS1A01G034100.1	chr1A	1.2596667461628022e-10	3.232591337501919e-10	3.6252210895123336e-10	3.011902332080237e-10	3.910301403893869e-10	2.890337413396629e-10	2.9365398303004697e-10	5.603311297134907e-10	4.684527956886821e-10	4.083130363820487e-10	1.5518122259396637e-10	3.774781619375296e-10	1.1555683829428827e-10	2.875367725467109e-10	2.8928512937089876e-10	2.363056708745645e-10	3.007251584966358e-10	2.9208551588478935e-10	4.176458766976981e-10	2.5100354165747837e-10	1.7097191850789832e-10	2.9385779796519306e-10	3.742403883397805e-10	2.2919662189372846e-10
TraesCS1A01G034200.1	chr1A	2.2415944701681805e-09	5.7524411821865745e-09	6.451131279080107e-09	5.359722031913616e-09	6.9584356579708605e-09	5.143395570714487e-09	5.225613413295107e-09	9.971170277019583e-09	8.336182562168386e-09	7.265987192562498e-09	2.7614714090072144e-09	6.717276319200831e-09	2.0563499870077337e-09	5.116756803131574e-09	5.147869055645334e-09	4.205092233444941e-09	5.351445962830758e-09	5.1977023226025885e-09	7.4320663822073025e-09	4.466642885397835e-09	3.042469035947843e-09	5.229240328373661e-09	6.659659688338108e-09	4.078585719463051e-09
TraesCS1A01G034300.1	chr1A	4.418748852898262e-10	1.1339514445378053e-09	1.2716809092231835e-09	1.0565365812396451e-09	1.3716834151236194e-09	1.0138931720504945e-09	1.0301003853723414e-09	1.9655695001927717e-09	1.643272127244692e-09	1.432309590320328e-09	5.443557602971099e-10	1.324144818569363e-09	4.0535851899947114e-10	1.0086419981532467e-09	1.0147750089157126e-09	8.289298858536229e-10	1.0549051589974389e-09	1.024598404455541e-09	1.4650479932071889e-09	8.804881252529613e-10	5.997474896324291e-10	1.0308153419381345e-09	1.3127871254218858e-09	8.039922568140715e-10
TraesCS1A01G034300.2	chr1A	2.97091213717642e-10	7.624036173353583e-10	8.550049739415881e-10	7.103543236038295e-10	9.222408971447804e-10	6.81683352216186e-10	6.925801486557712e-10	1.3215356832865345e-09	1.1048414992657593e-09	9.630024442972845e-10	3.659934495140716e-10	8.902786838149284e-10	2.72539712958227e-10	6.781527654403558e-10	6.822762485162706e-10	5.573246954588785e-10	7.092574492845183e-10	6.888809336905409e-10	9.850138601360806e-10	5.919894850412225e-10	4.0323565685825073e-10	6.930608442575309e-10	8.82642425329671e-10	5.405580705040766e-10
TraesCS1A01G034400.1	chr1A	4.443077821117936e-10	1.140194811059693e-09	1.2786825935134694e-09	1.0623537131391065e-09	1.3792356982075759e-09	1.019475515736939e-09	1.0357719635436964e-09	1.97639163095777e-09	1.6523197370299348e-09	1.4401956720289055e-09	5.473529014412097e-10	1.3314353612731173e-09	4.0759036218735535e-10	1.01419542966407e-09	1.0203622078636312e-09	8.334938494371253e-10	1.0607133085308042e-09	1.0302396895454546e-09	1.473114327650174e-09	8.853359607670864e-10	6.030496093275836e-10	1.0364908565530727e-09	1.320015134371215e-09	8.084189175535847e-10
TraesCS1A01G034500.1	chr1A	1.59757289633367e-10	4.0997353636964453e-10	4.597688216716335e-10	3.8198464369985687e-10	4.959241448887918e-10	3.665671676233042e-10	3.7242679114798084e-10	7.106401979167631e-10	5.941154610008649e-10	5.178431852160356e-10	1.9680865275775244e-10	4.787368423483888e-10	1.465550102099053e-10	3.6466863630336384e-10	3.668859906027854e-10	2.9969476942146577e-10	3.813948124957333e-10	3.7043758201176574e-10	5.296795639880483e-10	3.183353504069727e-10	2.1683520968893316e-10	3.7268527952774423e-10	4.746305345808897e-10	2.9067871497286774e-10
TraesCS1A01G034600.1	chr1A	2.3866144455306193	9.186893127470306	4.578991519013068	5.706469299254669	4.939074479350869	6.388838861393533	4.636403768730702	7.07750348860028	2.9584973248366055	11.604090452997289	4.900208045558088e-10	3.575925287568757	25.907729226695235	39.95042650077444	31.05849278765353	82.8271032162532	62.674235898353835	87.6211556056092	61.9842578876762	71.33418582304269	73.42416956308153	28.765654746288394	22.45327037369323	16.646057798458333
TraesCS1A01G034700.1	chr1A	9.275563324833851e-10	2.3803204891806514e-09	2.669433632722803e-09	2.217816013205634e-09	2.8793526860569075e-09	2.1283016154680635e-09	2.16232279170832e-09	4.126001493939137e-09	3.4494548533110557e-09	3.006615390025861e-09	1.1426778244167783e-09	2.779562614841723e-09	8.509034428997519e-10	2.1172786771578925e-09	2.1301527126808274e-09	1.7400381655634239e-09	2.2143914328954856e-09	2.150773374870036e-09	3.0753378133271593e-09	1.8482660215439317e-09	1.258952704530142e-09	2.1638235841546183e-09	2.7557212503468034e-09	1.6876906425364345e-09
TraesCS1A01G034800.1	chr1A	5.633326417176579e-10	1.445639668821757e-09	1.6212267088787703e-09	1.346945850952113e-09	1.7487168145685932e-09	1.2925810858340072e-09	1.3132431614563618e-09	2.5058438392509944e-09	2.094956874262212e-09	1.8260072525811513e-09	6.939823436248496e-10	1.6881113262913082e-09	5.167790543265509e-10	1.2858865264414426e-09	1.2937053124134869e-09	1.0567771057872104e-09	1.3448660011302427e-09	1.3062288559420116e-09	1.8677444311306307e-09	1.1225071125607124e-09	7.645995483010286e-10	1.3141546374970458e-09	1.6736317541373257e-09	1.0249848928493528e-09
TraesCS1A01G034900.1	chr1A	4.014796065972861e-10	1.0302879729289388e-09	1.1554264977456908e-09	9.599502146710954e-10	1.2462869835171691e-09	9.212051768443857e-10	9.359307605901681e-10	1.785881243645298e-09	1.4930476230749348e-09	1.3013708404589548e-09	4.945918941505458e-10	1.2030942661255218e-09	3.683014902103404e-10	9.164340542922222e-10	9.220063980260298e-10	7.531508477811834e-10	9.584679336413297e-10	9.309317592721052e-10	1.3311163669625018e-09	7.999957406682689e-10	5.449198273339421e-10	9.365803573206557e-10	1.192774869553094e-09	7.304929646799492e-10
TraesCS1A01G035000.1	chr1A	1.8195580817599663e-10	4.669399832214582e-10	5.236543992037967e-10	4.350619913165505e-10	5.648335596098106e-10	0.417502233891508	4.241760606056907e-10	8.09384735000462e-10	0.6766687092179582	0.5897982845407564	2.2415551459810528e-10	5.452580552226154e-10	0.8345952598318391	4.153398983376249e-10	4.178653573917294e-10	1.0240134416311995	4.3439020216890024e-10	4.2191044783245353e-10	6.032793455681237e-10	0.3625685322099689	0.4939295844369191	4.244704663392374e-10	5.405811697410865e-10	3.3106896482676394e-10
TraesCS1A01G035100.1	chr1A	0.6975464157009461	0.8950313679775455	1.003741658688815	8.339275770886664e-10	1.0826739435416575e-09	1.6005380065979702	1.6261228133781513	1.5514300608607978	2.5940795020042198	1.1305263703176657e-09	0.42966167833029784	1.0451515839353942	0.31995072763395793	7.961242351712011e-10	8.009650394521102e-10	6.542769115246586e-10	8.326398904890645e-10	8.087186758020234e-10	1.156366892531444e-09	3.474859943954227	4.733825404392106e-10	8.136257237015746e-10	1.036186920713871e-09	6.345935641303935e-10
TraesCS1A01G035200.1	chr1A	0.47088198982787405	1.2083902702186242e-09	1.355161056436959e-09	1.1258934684107378e-09	1.4617282782608373e-09	1.0804507106971352e-09	1.0977218548716198e-09	2.0946003207743543e-09	1.751145571046313e-09	1.5263342899037196e-09	0.5800902746822622	1.4110689860903278e-09	0.8639369752798566	1.0748548207891272e-09	1.0813904361968316e-09	8.833454144654581e-10	1.1241549506165267e-09	1.0918586935882898e-09	1.5612218220829344e-09	9.382882210026087e-10	0.6391182226325383	1.0984837451288217e-09	1.3989657113357953e-09	8.567707419440981e-10
TraesCS1A01G035300.1	chr1A	1.2226878928190077e-09	3.1376951902835868e-09	3.5187988794982408e-09	2.9234847446801548e-09	3.7955103626887072	2.8054884959224817	2.8503345890700583e-09	5.438820151101591e-09	4.547008674820674	3.963265741397727e-09	1.50625713369201	7.327937806428511	1.121645447458764e-09	2.7909582562535863e-09	2.8079285758065456e-09	2.29368667278815e-09	2.9189705280993836	2.83511035778323e-09	4.053854390294892e-09	2.4363506647624554e-09	1.65952856506246e-09	2.8523129092379462	3.6325416481844234e-09	2.224683119707118e-09
TraesCS1A01G035400.1	chr1A	5.210485935499888e-10	1.337129185205596e-09	1.499536568502882e-09	1.2458433778782256e-09	1.6174571989472219e-09	1.195559260989324e-09	1.2146704302090322e-09	2.3177538658447457e-09	1.9377082953224336e-09	1.6889461755108956e-09	6.418916592365437e-10	1.5614007909038251e-09	4.779893432269793e-10	1.1893671987908745e-09	1.1965991025228863e-09	9.774548532947078e-10	1.2439196426918953e-09	1.208182622203023e-09	1.7275505392055714e-09	1.038251130746228e-09	7.072082989128159e-10	1.2155134903725701e-09	1.5480080631488098e-09	9.480489807952852e-10
TraesCS1A01G035500.1	chr1A	3.592538716797084e-10	9.219271343738085e-10	1.0339041782832893e-09	8.589871703901622e-10	1.1152083859185353e-09	8.243171532363786e-10	8.374939694095663e-10	1.5980506620932886e-09	1.3360159031188064e-09	1.1644987821135224e-09	4.4257304718646503e-10	1.076558475197462e-09	3.2956527337686554e-10	8.200478348925395e-10	8.250341057461637e-10	6.739379873300741e-10	8.576607887007559e-10	8.330207395156068e-10	1.1911158141767963e-09	7.158559549218567e-10	4.876077252938113e-10	8.380752446141428e-10	1.067324424174388e-09	6.53663153703594e-10
TraesCS1A01G035500.2	chr1A	3.592538716797084e-10	9.219271343738085e-10	1.0339041782832893e-09	8.589871703901622e-10	1.1152083859185353e-09	8.243171532363786e-10	8.374939694095663e-10	1.5980506620932886e-09	1.3360159031188064e-09	1.1644987821135224e-09	4.4257304718646503e-10	1.076558475197462e-09	3.2956527337686554e-10	8.200478348925395e-10	8.250341057461637e-10	6.739379873300741e-10	8.576607887007559e-10	8.330207395156068e-10	1.1911158141767963e-09	7.158559549218567e-10	4.876077252938113e-10	8.380752446141428e-10	1.067324424174388e-09	6.53663153703594e-10
TraesCS1A01G035500.3	chr1A	8.991353863627244e-10	2.307385878091551e-09	2.587640401636589e-09	2.149860647898498e-09	2.7911273948406794e-09	2.063089031150101e-09	2.096067775806394e-09	3.999578049835153e-09	3.3437612505633638e-09	2.9144906844818933e-09	1.1076654119694676e-09	2.6943949581195534e-09	8.248311925602052e-10	2.0524038430388488e-09	2.0648834095067635e-09	1.686722232913848e-09	2.1465409990184656e-09	2.0848722408210935e-09	2.9811074067906725e-09	1.791633915034229e-09	1.2203775520236475e-09	2.0975225829688227e-09	2.671284108971275e-09	1.6359786729879646e-09
TraesCS1A01G035500.4	chr1A	1.246291906193892e-09	3.1982684565052774e-09	3.5867293597974348e-09	2.979922674114134e-09	3.86878275964403e-09	2.859648502636626e-09	2.90536035333782e-09	5.543816679115135e-09	4.634788760433388e-09	4.039776663046331e-09	1.535335455200922e-09	3.734701891756446e-09	1.1432988344753423e-09	2.8448377592700646e-09	2.8621356911696063e-09	2.3379663382859905e-09	2.975321307519804e-09	2.8898422179720956e-09	4.132114127559273e-09	2.4833844613794914e-09	1.6915657960482218e-09	2.907376862107364e-09	3.7026679348289097e-09	2.2676306702806147e-09
TraesCS1A01G035600.1	chr1A	10.329267319108824	13.253624485230494	11.560427253763041	9.60462188256129	10.688157172424601	5.266837065728343	8.02654220415904	2.552619590917013e-09	2.134062735915107e-09	1.8600927231560922	2.1208100428244774	1.7196227394350354	31.05911020429123	22.268125608538497	13.17854478376991	33.37161196569556	27.39940333106345	29.273459482228386	41.85739786649413	20.582290417056686	17.91405768443977	6.693427621656972	10.229237282992207	5.220589721956822
TraesCS1A01G035700.1	chr1A	2.2169615639025962e-10	5.689227542821887e-10	6.380239726562744e-10	5.300823987606872e-10	6.881969332059093e-10	5.086874740267075e-10	5.168189090072084e-10	9.861596977272114e-10	8.244576160386315e-10	7.186141179457415e-10	2.731125569347794e-10	6.64346009591291e-10	2.033752734403253e-10	5.060528706393864e-10	5.091299066022857e-10	4.1588824286818096e-10	5.292638864338112e-10	5.1405847146619e-10	7.350395323062167e-10	4.4175588976462103e-10	3.009035310278087e-10	5.171776148940983e-10	6.586476614839887e-10	4.0337660961722476e-10
TraesCS1A01G035800.1	chr1A	182.91410876931008	110.44687070718614	92.89629042907536	120.05777352344055	111.33497053866726	197.50638992366572	83.60981462108268	95.72323467534186	53.35156841121556	69.75347706022556	136.96898189117616	204.2052001144529	174.37847890154595	147.36259593837616	98.83908587662698	114.37850875643053	119.87238957597128	66.53058973762944	107.02175591567645	178.66571542306002	116.83081098526513	83.66784526234535	63.93273301870129	150.09195448276597
TraesCS1A01G035900.1	chr1A	1.7229228914022844e-10	4.4214119574852777e-10	4.958435570790154e-10	4.1195621702458544e-10	5.348357271138532e-10	3.9532904306532485e-10	0.40164842928582	7.663989964722817e-10	0.640731406539983	5.584745960656524e-10	2.1225080485563856e-10	5.162998612035866e-10	1.58054122300034e-10	3.9328154771867985e-10	0.39567288217465774	3.2320965124957114e-10	4.113201060302264e-10	3.9950314088858967e-10	5.712396899054451e-10	0.34331282420095266	2.338487009215316e-10	0.40192719938020705	5.118713611532893e-10	0.6269723446985187
TraesCS1A01G036000.1	chr1A	2.342449954312177e-10	6.011259290528787e-10	6.741385371462521e-10	5.600870628414809e-10	7.27151476594923e-10	5.374811046319929e-10	5.460728095170503e-10	1.0419800579759215e-09	8.711250282672333e-10	7.59290388772859e-10	2.885717582707103e-10	7.019505007002319e-10	2.1488708137090976e-10	5.346973727510498e-10	5.379485805609057e-10	4.3942908680411577e-10	5.592222196281779e-10	5.431561207944649e-10	7.766455435688327e-10	4.667609401286562e-10	3.179358063690054e-10	5.464518195107454e-10	6.959296045868561e-10	4.26209247897445e-10
TraesCS1A01G036100.1	chr1A	2.2811986127506573e-10	5.854074418620967e-10	6.565108863516151e-10	5.454416767459794e-10	7.081376217298968e-10	5.234268283977994e-10	5.317938738618342e-10	1.0147339363186007e-09	8.483464939591856e-10	7.394361524586572e-10	2.810260656516176e-10	6.835956112826287e-10	2.092681258862994e-10	5.207158866791143e-10	5.238820805745075e-10	4.2793871492301873e-10	5.445994478075118e-10	5.289534519115001e-10	7.56337497553252e-10	4.545558837436666e-10	3.096222905840915e-10	5.321629733468603e-10	6.777321520287545e-10	4.150645537828122e-10
TraesCS1A01G036100.2	chr1A	2.2811986127506573e-10	5.854074418620967e-10	6.565108863516151e-10	5.454416767459794e-10	7.081376217298968e-10	5.234268283977994e-10	5.317938738618342e-10	1.0147339363186007e-09	8.483464939591856e-10	7.394361524586572e-10	2.810260656516176e-10	6.835956112826287e-10	2.092681258862994e-10	5.207158866791143e-10	5.238820805745075e-10	4.2793871492301873e-10	5.445994478075118e-10	5.289534519115001e-10	7.56337497553252e-10	4.545558837436666e-10	3.096222905840915e-10	5.321629733468603e-10	6.777321520287545e-10	4.150645537828122e-10
TraesCS1A01G036200.1	chr1A	80.08355293811236	51.37815225661356	47.834251357730274	26.193328503268646	43.38741391067379	26.869652227513303	44.91153295259421	47.049454135024924	37.92987454992521	46.529528284082254	94.00313674148565	66.78757122164721	66.18823878637427	68.1196318234776	63.32872968248688	29.054259270760046	27.956529875771924	24.52561236451972	21.2916307837492	32.366825918111864	32.81380296750549	58.16114696502784	40.40219523148477	68.73216426080192
TraesCS1A01G036300.1	chr1A	1.7863287421373437e-10	4.58412578989965e-10	5.140912585431852e-10	4.271167529582517e-10	5.545183922234666e-10	4.098776769136061e-10	4.164296245237938e-10	7.946034974492639e-10	6.643111726354442e-10	5.790272029490867e-10	2.2006191637910285e-10	5.353003818289539e-10	1.6387072392313983e-10	4.077548310187862e-10	4.1023416934860437e-10	3.3510419569234726e-10	4.2645723223443787e-10	4.142053870806711e-10	5.92262069196376e-10	3.559471917527882e-10	2.4245464370586025e-10	4.167186537276189e-10	5.307089070950125e-10	0.3250228800165997
TraesCS1A01G036400.1	chr1A	3.824521370903057e-10	9.814591590460505e-10	1.100666948089497e-09	9.144549438336027e-10	1.1872212497011894e-09	8.775461637237987e-10	8.915738525053261e-10	1.701242322145521e-09	1.4222870722183028e-09	1.2396944973092413e-09	4.711515200201881e-10	1.1460755805271558e-09	3.5084644328094034e-10	8.730011607238705e-10	8.783094123375923e-10	7.174564948057718e-10	9.130429130896079e-10	8.868117706810102e-10	1.2680302832202032e-09	7.62081250589204e-10	5.190942431001059e-10	8.92192662660909e-10	1.136245254882331e-09	6.958724450268711e-10
TraesCS1A01G036500.1	chr1A	4.764422194896207e-10	1.2226590852175156e-09	1.3711629582103844e-09	1.139188151432562e-09	1.4789885383731423e-09	1.0932088002699426e-09	1.1106838841542365e-09	2.119333608694937e-09	1.7718233047265646e-09	1.544357425430258e-09	5.869400485565148e-10	1.4277310552987744e-09	4.3706922233079506e-10	1.0875468334331316e-09	1.094159623253463	8.937760614259357e-10	1.1374291050149506e-09	1.1047514899701441e-09	1.5796569137090057e-09	9.493676391103884e-10	6.466650054265527e-10	1.1114547709015604e-09	1.4154848636467712e-09	8.668875920334749e-10
TraesCS1A01G036600.1	chr1A	5.379826728403634e-09	1.3805858837247779e-08	1.5482715069792258e-08	1.2863332876592679e-08	1.6700245579130064e-08	1.2344149369714768e-08	1.2541472191908256e-08	2.3930808664846996e-08	2.0006838149204125e-08	1.7438369262149996e-08	6.627531381617313e-09	1.6121463166081993e-08	4.935239968818561e-09	1.2280216327515777e-08	1.23548857335488e-08	1.0092221360267858e-08	1.284347031079382e-08	1.247448557424621e-08	1.7836959317297526e-08	1.0719942924954804e-08	7.301925686274824e-09	1.2550176788096787e-08	1.5983183252011456e-08	9.788605726711319e-09
TraesCS1A01G036700.1	chr1A	2.273966915845143e-10	5.835516239766586e-10	6.544296612804054e-10	5.437125555446007e-10	7.058927331791504e-10	5.217674971348265e-10	5.301080179742834e-10	1.0115170974926521e-09	8.456571250103893e-10	7.370920434864388e-10	2.801351763980548e-10	6.81428524103501e-10	2.0860471865383138e-10	5.190651494547001e-10	5.222213061028024e-10	4.265820934244956e-10	5.428729965816338e-10	5.272766005317173e-10	7.539398091143723e-10	4.531148823510308e-10	3.08640747570616e-10	5.304759473658381e-10	6.755836527796321e-10	4.137487450529618e-10
TraesCS1A01G036800.1	chr1A	2.8402076876745977e-10	0.728861883909563	0.8173892697901438	6.791024835860631e-10	8.816671665180853e-10	6.516928835749109e-10	0.6621102791614463	1.2633950913565055	1.0562343061612386e-09	9.206354207910249e-10	0.6997833402478922	0.8511111226856203	2.6054940442508903e-10	6.483176239779558e-10	6.522596955679085e-10	5.328053511800014e-10	6.780538659460001e-10	6.585738094630644e-10	9.416784505392445e-10	5.659450730288502e-10	3.8549541678529643e-10	6.625698260323865e-10	8.438108184079961e-10	5.167763692060529e-10
TraesCS1A01G036900.1	chr1A	1.9563006285104124e-09	5.020312304453738e-09	5.630078207197185e-09	4.677575591488246e-09	6.072816574229115e-09	4.488781588987189e-09	4.5605353425120925e-09	8.702112241762544e-09	7.275213872437864e-09	6.341225186236362e-09	2.410011411497205e-09	5.8623502422116344e-09	1.7946327159340224e-09	4.465533210005737e-09	4.492685721290473e-09	3.669898676461039e-09	4.670352840288662e-09	4.536176572453168e-09	6.486167024471827e-09	3.898161063619929e-09	2.655245704099936e-09	4.563700650217013e-09	5.812066637095076e-09	3.5594929915313896e-09
TraesCS1A01G037000.1	chr1A	3.4990742948966726e-10	8.979420381949775e-10	1.0070058581978704e-09	8.366395366889548e-10	1.0861948344149638e-09	8.028715037212858e-10	8.157055084167972e-10	1.556475360315252e-09	1.3012577658018945e-09	1.1342028788390242e-09	4.3105895164990663e-10	1.0485504498264712e-09	3.209912174841341e-10	7.98713257074197e-10	8.035698038080521e-10	6.564046413182347e-10	8.353476624906549e-10	8.113486552355259e-10	1.1601274352713837e-09	6.972320601596621e-10	4.749219958552731e-10	8.162716610144252e-10	1.0395566342771683e-09	6.366572830381346e-10
TraesCS1A01G037100.1	chr1A	5.961026845876602e-10	1.5297350512185905e-09	1.7155362958218567e-09	1.4253000417277204e-09	1.8504427234493144e-09	1.3677727833478968e-09	1.3896368079676737e-09	2.651613148459501e-09	2.2168241716569664e-09	1.932229281124653e-09	7.34352507658428e-10	1.7863117081531292e-09	5.468409937749098e-10	1.3606887897524407e-09	1.3689624081494514e-09	1.1182516742679065e-09	1.4230992034120575e-09	1.382214468060522e-09	1.9763943841880912e-09	1.1878053102442996e-09	8.090776383684015e-10	1.3906013061603088e-09	1.77098983401789e-09	1.0846100528211988e-09
TraesCS1A01G037200.1	chr1A	1.2021959169617057e-09	3.08510812005537e-09	3.459824596601622e-09	2.8744877936519953e-09	3.7318984534368865e-09	2.758469132897155e-09	2.8025636183035207e-09	5.3476667407479325e-09	4.470801821051201e-09	3.896842293217875e-09	1.4810125992440924e-09	3.6025616013591046e-09	1.1028469204063824e-09	2.7441824195565985e-09	2.760868320346101e-09	2.2552449967079015e-09	2.8700492314623057e-09	2.787594541730997e-09	3.9859126966027986e-09	2.395517972056939e-09	1.6317152371563852e-09	2.8045087794629693e-09	3.571661061902002e-09	2.18739792775672e-09
TraesCS1A01G037300.1	chr1A	8.213475921226922e-10	2.1077647079767603e-09	2.363773293098055e-09	1.9638676147469737e-09	2.5496558136076434e-09	1.8846029572083616e-09	1.914728578917291e-09	3.653558574785801e-09	3.0544791067487215e-09	2.6623464522366407e-09	1.011836852155315e-09	2.4612920864247317e-09	7.534717509646658e-10	1.8748421874069887e-09	1.8862420967250076e-09	1.5407971542393677e-09	1.960835161953255e-09	1.9045016143887343e-09	2.723199895770614e-09	1.6366325076266875e-09	1.1147978146984463e-09	1.9160575249002728e-09	2.440180649162055e-09	1.494443622398675e-09
TraesCS1A01G037400.1	chr1A	3.693714473548072	9.127840553903322	9.449082306179196	12.757024340749593	16.98689950875786	12.242131606642594	14.032416438817664	9.736629082300896	10.683880512480444	22.172116036234915	11.965790924385423	27.876910243094645	4.643455279115625	9.9928015891363	7.8543456669059095	5.132725421880468	7.838354417594282	5.3926574640727285	11.793030954038718	8.17796027360112	6.684534639877827	15.318715469579043	16.66396728158812	6.4718054393968965
TraesCS1A01G037400.2	chr1A	1.4813657811116017e-10	3.801521478819949e-10	4.2632533464320124e-10	3.5419916135638405e-10	4.598507272821496e-10	3.399031492349179e-10	3.4533654498141137e-10	6.589483799407159e-10	5.508996277890076e-10	4.801753812432307e-10	1.8249283290364334e-10	4.439136255001926e-10	1.3589462970588053e-10	3.381427166823987e-10	3.4019878109817715e-10	2.778950351611159e-10	3.536522343495315e-10	3.434920304978305e-10	4.91150784322098e-10	2.951797042208758e-10	2.0106266231137653e-10	3.455762309709992e-10	4.4010600969283506e-10	2.6953480660976564e-10
TraesCS1A01G037500.1	chr1A	1.2296746807779734e-09	3.155624877085207e-09	3.538906301666802e-09	2.9401903717926126e-09	3.817198993332643	2.8215198559348045e-09	2.866622215293316e-09	5.4698991233936e-09	4.572991576960943e-09	3.985912974205714e-09	1.5148643157982431e-09	3.6849058665330274e-09	1.1280548500156713e-09	2.806906589146464e-09	2.8239738819540116e-09	2.3067934537755107e-09	2.9356503567528734e-09	2.851310988399134e-09	4.077019272525149e-09	2.450272668561098e-09	1.6690115854342456e-09	2.868611837279266e-09	3.653299029031191e-09	2.2373955946768735e-09
TraesCS1A01G037600.1	chr1A	4.4006762604528697e-10	1.1293136063188366e-09	1.2664797603102053e-09	1.05221536822844e-09	1.3660732580065494e-09	1.0097463697108194e-09	1.025887295861616e-09	1.957530361132679e-09	1.6365511778490082e-09	1.4264514733865026e-09	5.421293563695144e-10	1.3187290933400405e-09	4.0370061094630355e-10	1.0045166730074256e-09	1.0106245998812923e-09	8.255395795720129e-10	1.050590618469842e-09	1.0204078179342504e-09	1.459055976875053e-09	8.768869468265689e-10	5.972945346646073e-10	1.026599328269676e-09	1.3074178529252727e-09	8.007039449252614e-10
TraesCS1A01G037700.1	chr1A	8.757178613787791e-11	2.2472911834912285e-10	2.5202466201506657e-10	2.0938686180020639e-10	0.27184339005692315	2.009356923990467e-10	2.041476753973129e-10	3.8954110686131845e-10	3.256674685166162e-10	2.838584253198588e-10	1.0788168282610928e-10	2.624220808369288e-10	8.033488826074706e-11	1.9989500261827093e-10	2.0111045686731632e-10	0.49283772258647524	2.090635427692971e-10	0.2030572803047319	2.9034659767711646e-10	1.7449717186578626e-10	1.1885934378092496e-10	2.0428936714210723e-10	2.6017118695623644e-10	1.5933704384228953e-10
TraesCS1A01G037800.1	chr1A	2.583350169701625e-10	6.62946402748993e-10	7.43467710434202e-10	6.176870528976076e-10	8.019325608225723e-10	5.92756272255211e-10	6.022315578347302e-10	1.1491384713011764e-09	9.607125161682652e-10	8.37376675253301e-10	3.1824880583996703e-10	7.741398879271066e-10	2.3698631302850233e-10	5.896862582240469e-10	5.932718239399184e-10	4.846204734822501e-10	6.167332682253935e-10	5.990149135292298e-10	8.565166538918379e-10	5.147631656640962e-10	3.5063268601559775e-10	6.026495456469045e-10	7.67499796014956e-10	4.700410913186709e-10
TraesCS1A01G037900.1	chr1A	46.69612820393344	72.54457125042838	87.38217392677366	115.15666149708126	90.35358295877181	112.43065660171001	100.5595824150104	102.46080907520339	91.88998644019826	51.58544523934497	43.08002883178925	60.23978452001269	73.95656391826459	96.07486792771788	111.56666196025986	334.68333177911023	348.93580059475556	364.1594880582731	297.8419285295546	301.2571699706035	291.60333781869366	94.27897969958727	98.91635953626226	75.0576190011775
TraesCS1A01G038000.1	chr1A	3.3243007590547686e-10	8.530911742892552e-10	9.567074193486461e-10	7.948506411900729e-10	1.0319410244570587e-09	7.627692710431371e-10	7.749622363692022e-10	1.4787317403612974e-09	1.2362618835759503e-09	1.0775511387528319e-09	4.095282007178567e-10	9.96176920664181e-10	3.049581855088709e-10	7.588187226065362e-10	7.634326920833451e-10	6.236182096972931e-10	7.936232941788148e-10	7.708230014982211e-10	1.1021808023046874e-09	6.624063599354153e-10	4.512003513661066e-10	7.755001104900178e-10	9.87632332771048e-10	6.04857202474438e-10
TraesCS1A01G038100.1	chr1A	1.1759184105800293e-09	3.0176740627864e-09	3.3842000152551386e-09	2.81165745936452e-09	3.650326902542091e-09	2.6981747256207145e-09	2.7413053971384163e-09	5.230777850239781e-09	4.373079376875219e-09	3.8116654124918026e-09	1.4486407391513254e-09	3.523817085482403e-09	1.0787409767909422e-09	2.6842002901673835e-09	2.7005214718139457e-09	2.2059500241022644e-09	2.807315914927611e-09	2.7266635134964394e-09	3.898788921813666e-09	2.343156923487389e-09	1.596049330333295e-09	2.7432080411140523e-09	3.4935919676527782e-09	2.1395859511937312e-09
TraesCS1A01G038200.1	chr1A	1.156951985759884	2.9690019004833934e-09	3.3296161440413457e-09	2.766308145503802e-09	3.5914506621785093e-09	2.6546557784332838e-09	2.6970907939587647e-09	5.146410465558494e-09	4.302545838538522e-09	3.750186938096773e-09	1.4252755659392074e-09	3.4669813260391386e-09	1.0613419287781853e-09	2.6409067371001675e-09	2.6569646738814625e-09	2.1703701850038407e-09	2.7620366259771653e-09	2.682685069730368e-09	3.835905229526349e-09	2.3053640698827535e-09	1.5703065991988868e-09	2.6989627501283412e-09	3.4372437101099912e-09	2.105076500368026e-09
TraesCS1A01G038300.1	chr1A	3.655601400953771e-10	9.381104532671197e-10	1.0520531191251818e-09	0.8740656550026736	1.1347845251979827	8.387870466397351e-10	8.521951659280808e-10	1.6261025140326385e-09	1.3594680509085475e-09	1.1849401537134763e-09	4.503418832356045e-10	1.0954561607756732e-09	0.3353503945925573	8.34442785561661e-10	8.395165843861019e-10	6.857681558505906e-10	2.6181479690979566	8.476434138785647e-10	1.2120244168834304	1.456843886339494	4.961670908001012e-10	8.527866447177885e-10	1.0860600171242216e-09	6.651374219735892e-10
TraesCS1A01G038400.1	chr1A	4.6581947283962485e-11	1.1953987015439305e-10	1.3405915350133997e-10	1.1137888341086091e-10	1.4460130380948177e-10	1.0688346376836511e-10	1.0859200974305437e-10	2.0720809869266466e-10	1.7323187660758314e-10	1.509924461691319e-10	5.7385364441451585e-11	1.3958983908866722e-10	4.273243352754364e-11	1.063298909951579e-10	1.069764260066279e-10	8.738484473859174e-11	1.112069007356417e-10	1.0801199717941736e-10	1.5444369132518238e-10	9.282005563132812e-11	6.322469747838796e-11	1.0866737965016338e-10	1.3839252400904647e-10	8.475594827948326e-11
TraesCS1A01G038400.2	chr1A	4.6581947283962485e-11	1.1953987015439305e-10	1.3405915350133997e-10	1.1137888341086091e-10	1.4460130380948177e-10	1.0688346376836511e-10	1.0859200974305437e-10	2.0720809869266466e-10	1.7323187660758314e-10	1.509924461691319e-10	5.7385364441451585e-11	1.3958983908866722e-10	4.273243352754364e-11	1.063298909951579e-10	1.069764260066279e-10	8.738484473859174e-11	1.112069007356417e-10	1.0801199717941736e-10	1.5444369132518238e-10	9.282005563132812e-11	6.322469747838796e-11	1.0866737965016338e-10	1.3839252400904647e-10	8.475594827948326e-11
TraesCS1A01G038500.1	chr1A	3.149166865407005e-10	8.081478343754799e-10	9.063052723780833e-10	7.529755830200592e-10	9.775753509734673e-10	7.225843533491571e-10	7.341349575751174e-10	1.4008278242837267e-09	1.171131989221705e-09	1.0207825909551217e-09	3.879530564849159e-10	9.43695404843824e-10	2.8889209573572065e-10	7.188419313667773e-10	7.232128234272469e-10	5.907641771864113e-10	7.518128962415894e-10	7.302137897119734e-10	1.0441146917442452e-09	6.275088541436958e-10	4.2742979626974577e-10	7.346444949129827e-10	9.356009708494511e-10	5.729915547343212e-10
TraesCS1A01G038600.1	chr1A	6.788424893884711e-10	1.7420642065927798e-09	1.9536548983964993e-09	1.6231334860053852e-09	2.1072865084075793e-09	1.5576213715728415e-09	1.5825201503985181e-09	3.019660399349779e-09	2.524522163937429e-09	2.2004251434889584e-09	8.362815623491878e-10	2.0342540272658666e-09	0.622743214353792	1.549554110727543e-09	1.558976119356932	1.2734664176994142e-09	1.620627168554425e-09	1.5740675803465249e-09	2.250720418586438e-09	1.3526741861141707e-09	9.213786354920913e-10	1.5836185221573234e-09	2.016805457667061e-09	1.235155296745908e-09
TraesCS1A01G038700.1	chr1A	1.9451015589287015e-10	4.991572945073015e-10	5.597848172265956e-10	4.6507982681263077e-10	6.038052032225393e-10	4.463085038764002e-10	4.534428029614313e-10	8.652295992110995e-10	7.233566067805047e-10	6.304924108038563e-10	2.3962150219767326e-10	5.82879053910768e-10	1.784359133046783e-10	4.4399697478213116e-10	4.466966821409629e-10	3.6488899163366767e-10	4.643616864402706e-10	4.510208704156508e-10	6.449036209929807e-10	3.8758455890165e-10	2.640045442461521e-10	4.537575217148582e-10	5.778794788313875e-10	3.5391162615407e-10
TraesCS1A01G038800.1	chr1A	2.2184852488262406e-09	5.693137664844446e-09	6.384624771048354e-09	5.304467165605229e-09	6.886699207888687e-09	5.0903708741091835e-09	5.17174111006526e-09	9.868374707153401e-09	8.25024253575428e-09	7.191080108103091e-09	2.7330026315947686e-09	6.648026047868864e-09	2.0351505026055926e-09	5.064006732996198e-09	5.094798240638681e-09	4.161740767120767e-09	5.296276416822194e-09	5.1441177625757575e-09	7.355447141153618e-09	4.420595020599919e-09	3.0111033757834326e-09	5.1753306342667166e-09	6.591003402891323e-09	4.036538444004669e-09
TraesCS1A01G038900.1	chr1A	3.3106626020945436e-09	8.495913130614018e-09	9.527824658333698e-09	7.915897154826264e-09	1.0277074202541579e-08	7.596399612132164e-09	7.717829041174311e-09	1.4726651486059689e-08	1.231190039951023e-08	1.0731304161323074e-08	4.078480850226039e-09	9.92090040989661e-09	3.037070750042191e-09	7.55705620154817e-09	7.6030066052608e-09	6.2105977601648356e-09	7.90367403741158e-09	7.676606507228437e-09	1.0976590349106167e-08	6.59688795381834e-09	4.493492730015276e-09	7.723185715751868e-09	9.835805078160897e-09	6.023757370283889e-09
TraesCS1A01G039000.1	chr1A	1.2758482359850515e-09	3.274116720295916e-09	3.671790135128599e-09	3.0505927770575526e-09	3.960532548410293e-09	2.9274662536872974e-09	2.9742621798991913e-09	5.6752905924538335e-09	4.744704699415998e-09	4.135581643197628e-09	1.5717465727155685e-09	3.823271897094544e-09	1.1704126408265363e-09	2.9123042673950463e-09	2.9300124269285694e-09	2.3934121803006778e-09	3.0458822871447792e-09	2.9583760255129358e-09	4.230108929003366e-09	2.542278954534736e-09	1.731681980934741e-09	2.9763265110110957e-09	3.7904782415837456e-09	2.3214084727378625e-09
TraesCS1A01G039100.1	chr1A	1.885453292664825e-10	4.83850192894198e-10	5.426185188011305e-10	4.5081774100207985e-10	5.852889805769883e-10	4.326220573498167e-10	4.395375768192146e-10	8.386965653567873e-10	7.011742342010792e-10	6.111578012435747e-10	2.3227329608471897e-10	5.65004550213154e-10	1.7296401759878136e-10	4.303814133475156e-10	4.329983317832524e-10	3.5369934673835956e-10	4.5012162304183947e-10	4.3718991498526445e-10	6.251270788772498e-10	3.7569893428579925e-10	2.559086105002859e-10	4.3984264444264446e-10	5.601582915424577e-10	3.4305861191745286e-10
TraesCS1A01G039100.2	chr1A	1.885453292664825e-10	4.83850192894198e-10	5.426185188011305e-10	4.5081774100207985e-10	5.852889805769883e-10	4.326220573498167e-10	4.395375768192146e-10	8.386965653567873e-10	7.011742342010792e-10	6.111578012435747e-10	2.3227329608471897e-10	5.65004550213154e-10	1.7296401759878136e-10	4.303814133475156e-10	4.329983317832524e-10	3.5369934673835956e-10	4.5012162304183947e-10	4.3718991498526445e-10	6.251270788772498e-10	3.7569893428579925e-10	2.559086105002859e-10	4.3984264444264446e-10	5.601582915424577e-10	3.4305861191745286e-10
TraesCS1A01G039100.3	chr1A	1.885453292664825e-10	4.83850192894198e-10	5.426185188011305e-10	4.5081774100207985e-10	5.852889805769883e-10	4.326220573498167e-10	4.395375768192146e-10	8.386965653567873e-10	7.011742342010792e-10	6.111578012435747e-10	2.3227329608471897e-10	5.65004550213154e-10	1.7296401759878136e-10	4.303814133475156e-10	4.329983317832524e-10	3.5369934673835956e-10	4.5012162304183947e-10	4.3718991498526445e-10	6.251270788772498e-10	3.7569893428579925e-10	2.559086105002859e-10	4.3984264444264446e-10	5.601582915424577e-10	3.4305861191745286e-10
TraesCS1A01G039100.4	chr1A	1.885453292664825e-10	4.83850192894198e-10	5.426185188011305e-10	4.5081774100207985e-10	5.852889805769883e-10	4.326220573498167e-10	4.395375768192146e-10	8.386965653567873e-10	7.011742342010792e-10	6.111578012435747e-10	2.3227329608471897e-10	5.65004550213154e-10	1.7296401759878136e-10	4.303814133475156e-10	4.329983317832524e-10	3.5369934673835956e-10	4.5012162304183947e-10	4.3718991498526445e-10	6.251270788772498e-10	3.7569893428579925e-10	2.559086105002859e-10	4.3984264444264446e-10	5.601582915424577e-10	3.4305861191745286e-10
TraesCS1A01G039100.5	chr1A	2.4306446062064613e-10	6.237586824057732e-10	6.99520259177361e-10	5.811746781593077e-10	7.545291677317801e-10	5.577175920051854e-10	5.666327797548911e-10	1.081211234857545e-09	9.039234103556082e-10	7.878781293140058e-10	2.9943665880801114e-10	7.283793599133431e-10	2.2297770943457353e-10	5.548290509419779e-10	5.582026686844338e-10	4.5597385663860807e-10	5.80277273078034e-10	5.636062759448589e-10	8.058867161429604e-10	4.843347707057893e-10	3.299062810063927e-10	5.670260597031681e-10	7.221317734342527e-10	4.422562828333428e-10
TraesCS1A01G039200.1	chr1A	5.5172994394362536e-11	1.415864507708515e-10	1.5878350639903176e-10	1.3192034400402714e-10	1.7126993158666845e-10	1.2659584004493393e-10	1.2861949090069145e-10	2.4542321509115796e-10	0.20518080337623412	0.17883978408260862	0.0679688715998104	0.1653342092013003	5.06135198921654e-11	0.12594017270109556	0.12670594731291704	1.0350111642014725e-10	1.3171664279080917e-10	1.2793250738480002e-10	1.829275376528248e-10	1.0993873609046888e-10	0.22465543525640266	0.12870876130908776	1.6391607471509915e-10	0.10038737615417409
TraesCS1A01G039300.1	chr1A	1.4820459306897065e-10	3.8032668973134384e-10	4.2652107630281704e-10	3.543617872339581e-10	4.6006186168402384e-10	3.4005921128690827e-10	3.454951017054616e-10	6.592509274062534e-10	5.511525660937776e-10	4.803958474421486e-10	1.825766220831216e-10	4.4411744259179047e-10	1.3595702393439564e-10	3.382979704549801e-10	3.403549788856419e-10	2.780226270046242e-10	3.538146091127774e-10	3.436497403373612e-10	4.913762897327142e-10	2.9531523209241883e-10	2.0115497758332851e-10	3.4573489774371316e-10	4.403080785678088e-10	2.696585599644992e-10
TraesCS1A01G039400.1	chr1A	7.778999968772576e-11	1.9962682979512396e-10	2.238734556422546e-10	1.8599830644549e-10	2.4147842746061064e-10	1.7849113439761082e-10	1.813443382370154e-10	3.4602928542976744e-10	2.892903455722973e-10	2.521513810649475e-10	9.583127675552208e-11	2.331094806518664e-10	7.136146478590521e-11	1.7756668987852675e-10	1.7864637763897533e-10	1.459292159576025e-10	1.8571110221656323e-10	1.803757403192608e-10	2.5791482324083657e-10	1.5500580202368677e-10	1.0558273073297733e-10	1.8147020298489148e-10	2.3111001207872942e-10	1.4153906340587524e-10
TraesCS1A01G039400.2	chr1A	7.778999968772576e-11	1.9962682979512396e-10	2.238734556422546e-10	1.8599830644549e-10	2.4147842746061064e-10	1.7849113439761082e-10	1.813443382370154e-10	3.4602928542976744e-10	2.892903455722973e-10	2.521513810649475e-10	9.583127675552208e-11	2.331094806518664e-10	7.136146478590521e-11	1.7756668987852675e-10	1.7864637763897533e-10	1.459292159576025e-10	1.8571110221656323e-10	1.803757403192608e-10	2.5791482324083657e-10	1.5500580202368677e-10	1.0558273073297733e-10	1.8147020298489148e-10	2.3111001207872942e-10	1.4153906340587524e-10
TraesCS1A01G039500.1	chr1A	2.611566373011473e-10	6.701873221964942e-10	7.515881101840902e-10	6.244336347860525e-10	8.106915329674789e-10	5.992305519279015e-10	6.088093297042843e-10	1.1616897410119902e-09	9.712057353982586e-10	8.465227797160192e-10	3.2172482435035503e-10	7.825952993243686e-10	2.395747557678913e-10	5.961270061900863e-10	5.997517346382913e-10	4.899136582654301e-10	6.234694325628068e-10	6.055575521478743e-10	8.658718115192973e-10	5.203855788813012e-10	3.5446241195508854e-10	6.092318829173199e-10	7.758826821364787e-10	4.751750352772486e-10
TraesCS1A01G039500.2	chr1A	3.712358869513721e-10	9.526757104483805e-10	1.0683874688758315e-09	8.876365412254867e-10	1.1524033752131153e-09	8.518101922747397e-10	8.654264882282867e-10	1.6513496490981252e-09	1.3805753754482434e-09	1.203337729418056e-09	4.57333965378998e-10	1.1124643932891543e-09	3.40557099630953e-10	8.473984814847e-10	8.525510569441381e-10	6.964155050213588e-10	8.862659213888776e-10	8.608040649278581e-10	1.2308425060814852e-09	7.39731541687508e-10	5.038706626526618e-10	8.660271504149594e-10	1.102922363566058e-09	6.754644549772044e-10
TraesCS1A01G039600.1	chr1A	6.648601518109537e-10	1.7061823485785103e-09	1.9134148386972922e-09	1.5897012823801457e-09	2.0638820489141174e-09	1.5255385420862742e-09	1.5499244727384044e-09	2.957463480722595e-09	2.4725237671519006e-09	2.1551022775056637e-09	8.190564014357134e-10	1.992353841328362e-09	6.099163710177418e-10	1.5176374452130725e-09	1.5268653841666901e-09	1.2472364193945862e-09	1.5872465883576296e-09	1.5416460029964422e-09	2.2043616046093748e-09	1.3248127198708306e-09	9.024007027322132e-10	1.5510002209800356e-09	1.975264665542096e-09	1.209714404948876e-09
TraesCS1A01G039700.1	chr1A	2.2596402079399235e-10	5.798750649176526e-10	6.503065482586877e-10	5.402869951666508e-10	7.014453865927924e-10	5.184801975378972e-10	5.267681704686701e-10	1.0051442211346307e-09	8.403292187275097e-10	7.324481314168707e-10	2.7837023653975417e-10	6.771353097409307e-10	2.072904432125402e-10	5.157948754994376e-10	5.18931147366418e-10	4.2389449185584284e-10	5.394527256896249e-10	5.239545918479332e-10	7.491897508140367e-10	4.502601158538944e-10	3.0669621363422434e-10	5.271337817891545e-10	6.713272629476286e-10	4.1114199762175653e-10
TraesCS1A01G039800.1	chr1A	4.6377816624169257e-10	1.1901602445903257e-09	1.3347168176961184	1.108908006602817e-09	1.4396763444681302	1.0641508077340317e-09	1.08116139585416e-09	2.0630007469695687e-09	1.7247274266555279e-09	1.5033076950129305e-09	0.5713389127797279	1.3897813074208616e-09	0.42545172187532765	1.0586393385789462e-09	1.0650763563404137e-09	8.700190827817119e-10	1.1071957164477428e-09	1.075386687435018e-09	1.5376689066635796e-09	9.241330107719659e-10	6.29476352265071e-10	1.0819117920773092e-09	1.3778606251734017e-09	1.6876906433802799
TraesCS1A01G039900.1	chr1A	0.0706014007058197	0.1811792500138273	2.0318523713638133e-10	1.6881014273743674e-10	0.2191633280292692	1.6199671088864526e-10	1.6458624923764115e-10	3.140526071502231e-10	2.625569310919177e-10	2.2884999031692908e-10	0.434877387332206	0.8462710325518298	0.12953385751407298	1.6115769458682125e-10	1.6213760805182153e-10	1.324438498722816e-10	0.1685494793128253	1.6370715976701063e-10	0.46816166210540694	0.14068166582250324	9.582579640780609e-11	1.6470048278342241e-10	2.0975306105001917e-10	1.284593927389937e-10
TraesCS1A01G040000.1	chr1A	4.476970925162525e-10	1.1488925523368472e-09	1.2884367603155832e-09	1.0704576596332326e-09	2.7795138287068273	1.0272523747335454e-09	1.043673136635916e-09	1.991468127449126e-09	1.664924117825586e-09	1.4511819080846043e-09	1.6545848114962112	1.3415919430405097	0.8213991630434697	1.0219320106115765e-09	1.0281458318366452	8.398519855978802e-10	1.0688047415362401e-09	1.0380986608249276e-09	1.4843516783745756	8.920895637965163e-10	0.6076498496735159	1.044397513572548e-09	1.3300845979482493e-09	8.145857747609976e-10
TraesCS1A01G040100.1	chr1A	2.3509803620117847e-10	6.033150256626852e-10	6.765935208940535e-10	5.621267098292503e-10	7.297995154754581e-10	5.394384283924881e-10	5.480614213506884e-10	1.045774595696154e-09	8.74297369957937e-10	7.620554666635104e-10	2.896226386722788e-10	7.045067661798395e-10	2.1566962718799245e-10	5.36644559104841e-10	5.399076067100714e-10	4.410293383948081e-10	5.612587171504946e-10	5.451341110377077e-10	7.794738230428633e-10	4.684607250526498e-10	3.190936206675087e-10	5.484418115701436e-10	6.984639440063275e-10	4.2776135732168915e-10
TraesCS1A01G040200.1	chr1A	1.0706122842594296e-09	2.7474345944771704e-09	3.0811373273218426e-09	2.5598672391229212e-09	3.3234319560457843e-09	2.4565471382516953e-09	2.4958153615737824e-09	4.76234998305413e-09	3.981460328199826e-09	3.4703222412238796e-09	1.318911717734789e-09	3.2082513763347254e-09	9.821373072275744e-10	2.4438241447792595e-09	2.4586837280694133e-09	2.0084022607498226e-09	2.555914489710213e-09	2.482484691392281e-09	3.5496436452333383e-09	2.133321975115384e-09	1.453119539557179e-09	2.497547619521749e-09	3.180732985474918e-09	1.947981239146532e-09
TraesCS1A01G040300.1	chr1A	1.1325951007165546e-09	2.906496597315322e-09	3.2595189620615283e-09	2.7080700792826695e-09	3.515841174553698e-09	2.598768288361004e-09	2.6403099351385802e-09	5.038064982073052e-09	4.211965926148237e-09	3.671235634136841e-09	1.3952697645510134e-09	3.3939922454909463e-09	1.0389978881723287e-09	2.5853087005296376e-09	2.601028575483958e-09	2.124678181109023e-09	2.703888486482909e-09	2.626207489314992e-09	3.755149329957373e-09	2.2568300894641695e-09	1.537247512899963e-09	2.642142481704587e-09	3.3648806846339917e-09	2.060759100360278e-09
TraesCS1A01G040400.1	chr1A	0.33738134712893947	0.43289863133693146	4.854783925725296e-10	2.016723210739275	2.0946218656876043	4.644780531452983	0.3932523293791397	0.750378114098076	1.254674982547638	1.0936003723565726	1.246883353948202	0.5055070765258466	1.5475014273797422e-10	0.3850603503463599	0.38740169571686506	2.5316259490640736	2.0136091424137725	1.173455659322073	1.6778953113058646	0.6722723551804407	1.6027221262992117	0.7870505436763131	0.5011711502898765	0.6138660505840998
TraesCS1A01G040500.1	chr1A	8.611975593218059	13.096466882002193	11.015370406303743	19.06620485737235	14.85199705752873	15.369197832590174	9.666352085415935	14.188226482553405	9.489409400018173	17.57622198462381	8.644606150328563	19.11635948642854	6.729872685045185	12.377293137157023	8.79003728151821	11.368707857026573	10.660588005768195	6.656346058143699	10.57527232356594	8.897976341507144	14.719296838378217	20.090203950068975	19.90001076926228	12.767746600638596
TraesCS1A01G040600.1	chr1A	7.318049172306171	6.532096838003993	3.6627418600885124	6.3397402055728005	6.584621224234629	6.5705674321270156	5.439376801074876	2.8306525778809815	3.9441770628299273	4.125390461571972	6.271493471153446	3.813850330391432	5.934936187340906	5.083973245739015	5.602018174154308	4.576068827920215	5.82355479864172	4.672552507109955	7.032808011114588	4.438024670966403	4.8943415148476275	3.216408048453591	3.466042696660606	6.75408970812587
TraesCS1A01G040700.1	chr1A	0.19265270308982851	4.943906477080673e-10	5.544392146747451e-10	4.6063859898272795e-10	5.980392329142369e-10	4.420465306970374e-10	4.491127015902688e-10	8.569671858494896e-10	7.164489937047135e-10	6.244715939892567e-10	2.3733326344198077e-10	5.773129155266605e-10	1.7673195949215977e-10	4.3975707529152294e-10	4.424310020966446e-10	3.6140452498721066e-10	4.5992731641159604e-10	4.467138970186647e-10	6.387451859372436e-10	3.838833634719715e-10	2.6148346235541e-10	4.4942441497213203e-10	5.723610833307596e-10	3.5053198663245555e-10
TraesCS1A01G040800.1	chr1A	2.908014447785748e-09	7.462626398512313e-09	8.369035172860679e-09	6.953152906266313e-09	9.027159772502738e-09	6.6725131728187945e-09	6.779174157788246e-09	1.2935572251268648e-08	1.0814507107677905e-08	9.426145547108106e-09	3.5824493954688183e-09	8.714304414098374e-09	2.6676972804424656e-09	6.63795477163015e-09	6.6783166127290816e-09	5.4552547893339775e-09	6.942416384212875e-09	6.742965175268222e-09	9.641599630971635e-09	5.794563743218813e-09	3.946986857445851e-09	6.783879344917182e-09	8.639558514600788e-09	5.291138230654768e-09
TraesCS1A01G040900.1	chr1A	4.492548416203452e-10	1.152890090793134e-09	1.2929198388135496e-09	1.0741822861455265e-09	1.394592532703972e-09	1.0308266697047824e-09	1.047304567173967e-09	1.998397383285762e-09	1.6707171732112005e-09	1.4562312536242166e-09	5.534472970035335e-10	1.3462599721154066e-09	4.1212859864873163e-10	1.0254877935295013e-09	1.0317232345343466e-09	8.427742263271698e-10	1.072523616767751e-09	1.041710695135383e-09	1.4895164356824656e-09	8.951935636705473e-10	6.097641491669999e-10	1.0480314645592306e-09	1.334712588894485e-09	8.174201024393587e-10
TraesCS1A01G041000.1	chr1A	3.362391705252271e-09	8.628661773279863e-09	9.676696918620162e-09	8.039583047870425e-09	1.043765348695629e-08	7.71509335607173e-09	7.838420119942662e-09	1.4956755415529374e-08	1.250427384325258e-08	1.0898980788843748e-08	4.142207113510821e-09	1.0075914478801246e-08	3.0845249805116007e-09	7.675135204697363e-09	7.721803583468001e-09	6.307638350167411e-09	8.027168944246136e-09	7.796553483903883e-09	1.1148099573310953e-08	6.699964328096753e-09	4.563703553921765e-09	7.843860492560492e-09	9.989489532507162e-09	6.117878579194575e-09
TraesCS1A01G041100.1	chr1A	1.6926565480032409e-10	4.343741637309212e-10	4.871331432551313e-10	4.047194402703517e-10	5.254403433391735e-10	3.8838435353061675e-10	3.9459272759019157e-10	7.529357734089249e-10	6.294757676729142e-10	5.486639516145777e-10	2.0852222490668002e-10	5.072300943706972e-10	1.5527760782858607e-10	3.8637282624590807e-10	3.8872215207809544e-10	0.3175318732153145	4.040945037481013e-10	3.9248512556621537e-10	5.612048028515215e-10	3.3728189590838396e-10	2.2974071377896665e-10	3.9486660056937975e-10	5.028793891561026e-10	3.0797920482573634e-10
TraesCS1A01G041200.1	chr1A	1.0600643799810117e-09	2.7203662733493163e-09	3.0507812945403467e-09	2.5346468722350106e-09	3.290688784065038e-09	2.4323447033920726e-09	2.4712260476666512e-09	4.715430278787585e-09	3.942234118069778e-09	3.4361318743152702e-09	1.3059175136191752e-09	3.176642988390541e-09	9.724610775997167e-10	2.4197470596090204e-09	2.4344602430638035e-09	1.988615046358199e-09	2.53073306616627e-09	2.4580267141371844e-09	3.5146717866596107e-09	2.1123040246216363e-09	1.438803090891591e-09	2.47294123903385e-09	3.1493957146820615e-09	1.9287893057559252e-09
TraesCS1A01G041300.1	chr1A	9.222560105834801e-10	2.3667186578139053e-09	2.6541797262501015e-09	2.2051427788444594e-09	2.8628992421365827e-09	2.1161398919511034e-09	2.1499666614699866e-09	4.1024243425452e-09	3.429743682720707e-09	2.989434730654285e-09	1.1361482368486824e-09	2.7636793998997705e-09	8.460411375117534e-10	2.105179941859848e-09	2.117980411465509e-09	1.730095090331633e-09	2.2017377675646546e-09	2.1384832412993504e-09	3.0577644543938616e-09	1.8377045014208235e-09	1.2517586890756842e-09	2.1514588779594496e-09	2.739974271773393e-09	1.678046696007655e-09
TraesCS1A01G041400.1	chr1A	2.723962900457536e-09	6.990308272024192e-09	7.83934940242646e-09	6.51307993751528e-09	8.45582054639497e-09	6.25020221876401	6.350112502232028e-09	1.2116865146757974e-08	1.0130044632508418e-08	8.829554056784808e-09	3.3557120919581336e-09	8.162766160041515e-09	2.4988556804144613e-09	6.217831051906724e-09	6.255638346100659e-09	5.109985498869802e-09	6.503022942174086e-09	6.3161952274664366e-09	9.031371806226595e-09	5.427819202508761e-09	3.6971775626707968e-09	6.354519892707234e-09	8.092751013676689e-09	4.956256064157631e-09
TraesCS1A01G041500.1	chr1A	2.561822251620778e-09	6.574218493927514e-09	7.372721461805837e-09	6.1253966079012765e-09	7.95249789482384e-09	5.878166366530843e-09	5.9721296151944075e-09	1.1395623173736665e-08	9.527065785335298e-09	8.303985362928569e-09	3.1559673245796733e-09	7.676887221943807e-09	2.3501142708659812e-09	5.847722060721799e-09	5.883278920737524e-09	4.805819695365647e-09	6.115938243235152e-09	5.940231225831529e-09	8.49379015109406e-09	5.1047347261689545e-09	3.477107469654678e-09	5.9762746609984704e-09	7.611039643814982e-09	4.6612408222434866e-09
TraesCS1A01G041600.1	chr1A	2.7947151835863037e-09	7.171874720648197e-09	8.04296886742455e-09	6.68225084498321e-09	8.675452248898736e-09	6.412545127124556e-09	6.51505048930299e-09	1.2431588916803636e-08	1.0393162674911236e-08	9.058893123194804e-09	3.4428734449960073e-09	8.374786060302335e-09	2.563761022762889e-09	6.379333157151054e-09	6.41812245898639e-09	5.242712394944343e-09	6.6719326289838025e-09	6.4802522463616685e-09	9.26595289210261e-09	5.568801519457041e-09	3.793208148714194e-09	6.519572357452877e-09	8.302952338707253e-09	5.0849899879019846e-09
TraesCS1A01G041700.1	chr1A	4.4492019807611026e-10	1.1417664096965771e-09	1.2804450781358174e-09	1.0638180187395738e-09	1.3811367811823624e-09	1.0208807197558734e-09	1.0371996299303864e-09	1.9791158096358646e-09	1.6545972280527187e-09	1.4421807797780838e-09	5.481073506506392e-10	1.333270558187346e-09	4.081521683378548e-10	1.0155933558248748e-09	1.0217686340633053e-09	8.346427038126417e-10	1.0621753530635824e-09	1.031659730468329e-09	1.4751448091493474e-09	8.865562722223132e-10	6.038808286374767e-10	1.0379195138329527e-09	1.3218345901043246e-09	8.095332096522112e-10
TraesCS1A01G041800.1	chr1A	3.2054578322166636e-10	8.22593376598676e-10	9.225053666211871e-10	7.664349280988686e-10	9.950493890246314e-10	7.355004589700955e-10	7.472575288128057e-10	1.425867447756524e-09	1.1920658281551614e-09	1.0390289530575966e-09	3.948876692125509e-10	9.605638430634754e-10	2.940560060865081e-10	7.316911416593313e-10	7.361401628728182e-10	6.013240135214216e-10	7.652514584385592e-10	7.432662705608467e-10	1.0627781122520869e-09	6.387254970181611e-10	4.350700508207442e-10	7.477761740673359e-10	9.52324722066224e-10	5.832337076491353e-10
TraesCS1A01G041900.1	chr1A	3.383538822895367e-10	8.682930086319358e-10	9.737556647668087e-10	8.090146463265836e-10	1.050329910637111e-09	7.763615955795452e-10	7.887718359690727e-10	1.50508230596522e-09	1.2582917074971148e-09	1.0967527837830187e-09	4.168258730576927e-10	1.013928501011446e-09	3.103924508690919e-10	7.723406495292943e-10	7.770368385879748e-10	6.347309031615006e-10	8.077654283518125e-10	7.845588411475605e-10	1.1218213407105363e-09	6.742102468525034e-10	4.592406091996745e-10	7.893192948488545e-10	1.005231651069903e-09	6.156355802963094e-10
TraesCS1A01G042000.1	chr1A	1.1759184105800293e-09	3.0176740627864e-09	3.3842000152551386e-09	2.81165745936452e-09	3.650326902542091e-09	2.6981747256207145e-09	2.7413053971384163e-09	5.230777850239781e-09	4.373079376875219e-09	3.8116654124918026e-09	1.4486407391513254e-09	3.523817085482403e-09	1.0787409767909422e-09	2.6842002901673835e-09	2.7005214718139457e-09	2.2059500241022644e-09	2.807315914927611e-09	2.7266635134964394e-09	3.898788921813666e-09	2.343156923487389e-09	1.596049330333295e-09	2.7432080411140523e-09	3.4935919676527782e-09	2.1395859511937312e-09
TraesCS1A01G042100.1	chr1A	1.4227640938178088	0.9127840562680092	1.0236505841504115	4.252341447657965	3.31244540522912	4.8968526433476205	8.291882440931079e-10	1.5822022257750083e-09	1.3227661599478324	3.45885010273642	0.8763677864371676	1.0658818632861793	0.6525937152113959	1.6238302589958198	1.6337038994679332	1.3345086102894506	1.6983101245904866	0.8247593776344263	1.179303095358514e-09	7.087565570218053e-10	0.9655438928827488	1.659527509999587	1.0567393896194806	0.6471805445619787
TraesCS1A01G042200.1	chr1A	8.556384458693652e-11	2.1957628369380165e-10	2.4624596532472776e-10	2.0458581115853168e-10	2.656102676601204e-10	1.9632841939904207e-10	1.9946675454327246e-10	3.806092829399125e-10	3.182002091324712e-10	2.773498093383697e-10	1.0540805378317795e-10	2.564049807726759e-10	7.849288220784987e-11	1.9531159169011179e-10	1.964991766767205e-10	1.6051246696251068e-10	2.0426990553946434e-10	1.9840136102180852e-10	2.836892137939964e-10	1.704961101384462e-10	1.161340069387646e-10	1.996051974249986e-10	2.542056978451127e-10	1.5568359008685998e-10
TraesCS1A01G042300.1	chr1A	9.702122143198617e-11	2.4897851825514483e-10	2.7921938809363853e-10	2.3198075521357401e-10	3.011766560708758e-10	2.2261766221307067e-10	2.261762342995177e-10	4.3157454760770055e-10	3.6080862306950634e-10	3.144881742497745e-10	1.1952265791915805e-10	2.9073874059660944e-10	8.900342594803537e-11	2.2146467678116821e-10	2.2281128464470335e-10	1.8200579549626436e-10	2.3162254843631773e-10	2.2496817987820038e-10	3.216764529720022e-10	1.9332629260513623e-10	1.3168486359377498e-10	2.263332152948023e-10	2.8824496396774495e-10	1.7653031067107883e-10
TraesCS1A01G042400.1	chr1A	1.039580044135968e-09	2.667798809130006e-09	2.9918289989936733e-09	2.485668188713561e-09	3.227100595000979e-09	2.3853428733748346e-09	2.4234728873252668e-09	4.624310853110531e-09	3.866055681005629e-09	3.3697331907536224e-09	1.2806823925830558e-09	3.115258582817777e-09	9.536695591919926e-10	2.3729886623218897e-09	2.3874175330529085e-09	1.950187702467219e-09	2.481830011747598e-09	2.4105286133809103e-09	3.446755423632372e-09	2.071486555546822e-09	1.4110001326134926e-09	2.42515493489793e-09	3.088537826475644e-09	1.8915180148234437e-09
TraesCS1A01G042500.1	chr1A	0.07296329204950443	1.8724040014350515e-10	2.0998257327928015e-10	0.17445749850075964	0.2264951934335033	1.674161306923341e-10	1.7009229916692933e-10	3.2455888785958857e-10	2.7134048122790406e-10	0.23650591247181327	0.3595405813711137	0.2186455223626147	0.06693363436374956	0.33309809223298065	1.675617414134105e-10	0.1368746117137443	1.7418811452252015e-10	0.1691838009048919	2.4191174480964094e-10	1.4538801435291325e-10	9.903154185725348e-11	0.17021035443915414	0.6503103495300755	1.3275685886136512e-10
TraesCS1A01G042600.1	chr1A	4.3916952884927624e-10	1.1270088846732882e-09	1.2638951077381436e-09	1.050067989925933e-09	1.3632853533983726e-09	1.0076856628338587e-09	1.0237936483190414e-09	1.953535401212e-09	1.6332112774860512e-09	1.423540347930612e-09	5.410229699279439e-10	1.316037809476081e-09	4.0287673214845396e-10	1.0024666389808799e-09	1.0085621006978612e-09	8.238548049198252e-10	1.048446555983169e-09	1.0183253529996908e-09	1.4560783116161245e-09	8.750973816289636e-10	5.960755662265162e-10	1.0245042275997377e-09	1.3047496532254253e-09	7.990698552417404e-10
TraesCS1A01G042700.1	chr1A	25.851892622190515	18.428287660015613	20.666582965081908	27.472301584651326	75.79199328682391	21.420325937971455	20.088676260125542	38.33188485011276	45.39927678173218	148.97294319844778	183.12333650741863	120.50748885206403	30.30314196715315	22.948568889544084	23.088106822963926	36.37241068796322	24.001145855033183	31.637182548140487	76.1890142164215	48.65113140723246	52.6323453258477	135.69267895640354	108.8065422738911	171.16449613467918
TraesCS1A01G042800.1	chr1A	3.7490081731035777e-10	9.620807552089047e-10	1.078934848069147e-09	8.963995035953088e-10	1.1637801797303183e-09	8.602194682728063e-10	8.739701875894256e-10	1.6676521717663415e-09	1.3942047490734583e-09	1.2152173701846686e-09	4.618488767677571e-10	1.123446910528362e-09	0.34391916193406286	8.557642040080682e-10	8.609676469371987e-10	7.0329068712668e-10	8.950153526685588e-10	8.693021306094922e-10	1.2429936806479113e-09	7.470343501710665e-10	5.088449955592212e-10	8.745767796583128e-10	1.1138106795826802e-09	6.821328032551444e-10
TraesCS1A01G042900.1	chr1A	3.3260134333252756e-10	8.535306854558132e-10	9.572003134338336e-10	7.952601469299956e-10	1.0324726787715652e-09	7.631622485140507e-10	7.7536149563575e-10	1.479493580516043e-09	1.2368988036602241e-09	1.0781062913230292e-09	4.097391889717041e-10	9.96690149371375e-10	3.051152994632804e-10	7.592096647614083e-10	7.638260113476847e-10	6.239394967708104e-10	7.940321675915808e-10	7.712201282377874e-10	1.1027486440369413e-09	0.6627476312627354	4.5143280904326576e-10	7.758996468684257e-10	9.881411593206468e-10	6.051688239079642e-10
TraesCS1A01G043000.1	chr1A	1.3366029138891016e-09	3.430027040310008e-09	3.846637284420437e-09	3.1958590997745787e-09	4.14912933642983e-09	3.0668694086247877e-09	3.115893712275343e-09	5.945542525427825e-09	4.970643018435808e-09	4.332514102397515e-09	1.646591647606786e-09	4.005332463622856e-09	1.2261465761039903e-09	3.050985422985287e-09	3.0695368282108822e-09	2.507384188886425e-09	3.1909243008183406e-09	3.099251074346885e-09	4.431542687527336e-09	2.6633398571316282e-09	1.814143027645919e-09	3.1180563448687674e-09	3.970977205468686e-09	2.4319517333444274e-09
TraesCS1A01G043100.1	chr1A	6.621325204189087e-10	1.6991826261228035e-09	1.905564931666739e-09	1.5831794309652526e-09	2.055414840508316e-09	1.5192799224264332e-09	1.5435658082348622e-09	2.945330297211938e-09	2.462380079902046e-09	2.1462608322646147e-09	8.156961700452078e-10	1.984180081979322e-09	6.074141500084382e-10	1.5114112403096342e-09	1.52060132105216e-09	1.242119552032967e-09	1.580734807482316e-09	1.5353213014456874e-09	2.1953180698212336e-09	1.319377590763668e-09	8.986985460030553e-10	1.5446371431503736e-09	1.9671610156321795e-09	1.2047514740567778e-09
TraesCS1A01G043200.1	chr1A	4.92539994770621	1.8056709110451326	1.5187404433196563	2.523596641060035	3.276342457487105	1.2108702383047998	3.6906784656037854	0.7824787582161681	0.6541745450423203	2.8509595529652865	3.4672643742508296	1.0542646217423033	3.5501453728264933	0.4015329593393786	3.231795723621099	1.979945335314421	3.7795498466481035	2.4473105217858886	4.665798623091568	3.1546426049693683	2.8650607599760156	2.051800020262696	2.613054483140288	6.081204647977232
TraesCS1A01G043300.1	chr1A	0.7911509902622738	2.030273358418791e-09	2.276869863204744e-09	1.8916665994989234e-09	2.4559184675191273e-09	1.8153160837815838e-09	1.8443341458688611e-09	3.5192365683598524e-09	2.9421820807653125e-09	2.564466070527701	9.74636967884899e-10	2.3708034067767636e-09	7.257705836497884e-10	1.8059141658111437e-09	1.8168949608160001e-09	1.484150200039391e-09	1.8887456339402673e-09	1.8344831726832663e-09	2.6230822525437536e-09	1.5764621948462947e-09	1.0738126009227682e-09	1.8456142335436453e-09	2.350468125295803e-09	1.4395008421634293e-09
TraesCS1A01G043400.1	chr1A	9.114488315804546e-11	2.338984978779802e-10	2.623077521354046e-10	2.1793024780334906e-10	2.8293512205218235e-10	2.091342544636132e-10	2.1247729253550622e-10	4.0543513197538327e-10	3.3895532654306014e-10	0.2954403944021748	1.1228346262799343e-10	2.7312940560918244e-10	0.08361270603564255	0.2080511027496145	2.093161496577518e-10	1.7098214926332667e-10	0.2175937369527707	2.113424070181484e-10	3.021932963540453e-10	1.8161699152824743e-10	1.2370903322786655e-10	2.126247655755491e-10	2.707866709362382e-10	1.6583830117257636e-10
TraesCS1A01G043500.1	chr1A	3.914973968516895e-10	1.004671352619608e-09	1.126698489008533e-09	9.36082440989158e-10	1.2152998602156507e-09	8.983007424898557e-10	9.126601958938694e-10	1.741477889497659e-09	1.455925153368402e-09	1.2690141367240748e-09	4.822945820461356e-10	1.1731810672709757e-09	3.591442063421633e-10	8.936482469993289e-10	8.990820424656495e-10	7.344248412566058e-10	9.346370147333282e-10	9.077854875133689e-10	1.2980200837329914e-09	7.801050036352798e-10	5.313711839617822e-10	9.132936413411852e-10	1.163118247569057e-09	7.123303136478825e-10
TraesCS1A01G043600.1	chr1A	13.369983585654667	10.503189310525235	18.846246577709056	26.7487733534994	20.328278643236946	24.416998753908032	12.72169622235198	16.992290177436455	19.279624252995024	23.880099920312166	15.798510986101837	18.80610242617112	15.018481731228174	16.1936918610832	15.038914164878753	14.33214867781533	15.633640953773208	12.021059641072823	17.188616756373115	19.029484482711986	18.887483178731255	23.551472925044695	23.508654995316085	13.900978547305439
TraesCS1A01G043700.1	chr1A	5.890321235478432e-10	1.511590383640268e-09	1.695187781364116e-09	1.4083941105758408e-09	1.8284940415105912e-09	1.351549201063661e-09	1.3731538896249916e-09	2.6201615326474815e-09	2.1905297243654158e-09	1.9093105031551093e-09	7.256421220748884e-10	1.765123704315547e-09	5.403547411115213e-10	1.3445492329396838e-09	1.3527247153520585e-09	1.104987740175313e-09	1.4062193770942138e-09	1.3658195884211182e-09	1.952951750069072e-09	1.1737163786446867e-09	7.994809145556378e-10	1.3741069476018382e-09	1.7499835677384811e-09	1.0717451525596337e-09
TraesCS1A01G043800.1	chr1A	1.8236700774249606e-09	4.679952148219586e-09	5.248377989760088e-09	4.3604518225737894e-09	5.661100196315277e-09	4.184457413462634e-09	4.251346505731612e-09	8.11213853045661e-09	6.781979033628517e-09	5.911311614288134e-09	2.246620807327903e-09	5.4649027681633875e-09	1.6729627012944277e-09	4.1627851957680604e-09	4.188096858830102e-09	3.4210919865314776e-09	4.353718749421634e-09	4.22863917771058e-09	6.0464268872195e-09	3.633878957611798e-09	2.4752290461948555e-09	4.254297216303996e-09	5.418028221020834e-09	3.3181714327834986e-09
TraesCS1A01G043900.1	chr1A	1.626963728347873e-10	4.1751589225547727e-10	4.682272702558143e-10	3.890120829614722e-10	5.050477493688529e-10	3.733109688421805e-10	3.792783929004513e-10	7.237139717191634e-10	6.050455085444797e-10	5.273700381698588e-10	2.0042937646020103e-10	4.875442489742539e-10	1.4925120873443232e-10	3.7137750990471105e-10	3.7363565726458073e-10	3.052083072661651e-10	3.884114005280389e-10	3.77252587930833e-10	5.394241729021429e-10	3.2419182232726225e-10	2.208243655123435e-10	3.7954163673679805e-10	4.833623967342176e-10	2.9602638286425366e-10
TraesCS1A01G044000.1	chr1A	1.339931937335899e-10	3.438570071543656e-10	3.856217950135058e-10	3.203818898279621e-10	4.159463407006243e-10	3.074507937662458e-10	3.123654344186365e-10	5.960350850522291e-10	4.983023200299907e-10	4.3433049220797e-10	1.6506927476008253e-10	4.015308385076462e-10	1.2292004903657686e-10	3.058584390414889e-10	3.0771820008838853e-10	2.5136292304527667e-10	3.198871808416891e-10	3.106970255104909e-10	4.442580153747827e-10	2.6699733312465264e-10	1.8186614411643395e-10	3.125822363162338e-10	3.980867559654162e-10	2.4380088983091706e-10
TraesCS1A01G044100.1	chr1A	5.0278754471062e-10	1.2902671810511943e-09	1.4469827168030146e-09	1.2021806426722128e-09	1.5607706148719687e-09	1.153658819599511e-09	1.1721002048512387e-09	2.2365241742847656e-09	1.8697979578695445e-09	1.6297541366495321e-09	6.193954562259172e-10	1.5066788005684104e-09	4.6123738026341687e-10	1.1476837689267083e-09	1.154662218088673e-09	9.431982579689586e-10	1.2003243281115718e-09	1.1658397732940383e-09	1.6670055436726656e-09	1.0018638247621313e-09	6.824229613340957e-10	1.1729137185137182e-09	1.4937554441132205e-09	9.148229651132074e-10
TraesCS1A01G044200.1	chr1A	4.922717268523564	1.8046874315102797	2.023884322848661e-09	1.6814814217768208e-09	2.18303863779478e-09	3.2272285950030963	1.639408131300618	3.128210282986536e-09	2.615272963295551	9.118101577259914	7.797095743945536	6.322142420178751	2.5805176313999323	4.815771110434975	3.2300354875101287	1.319244623576481	5.0366550255195985	3.261303419734236	2.331628668927781e-09	1.4012997301535617	3.818000359791009	3.281091972384804	4.178610002615177	1.2795563054248271
TraesCS1A01G044300.1	chr1A	1.3794427508727266e-09	3.5399638044225073e-09	3.969926940972373e-09	3.2982904811776097e-09	4.282114251058991e-09	3.165166505055069e-09	3.2157621004892963e-09	6.136104785858205e-09	5.129958499795929e-09	4.471376733884614e-09	1.6993670209275162e-09	4.1337085041235885e-09	1.2654461458509131e-09	3.148773417311738e-09	3.167919418858667e-09	2.587749066735348e-09	3.2931975155881585e-09	3.1985860446785157e-09	4.5735793121275704e-09	2.748703314090975e-09	1.872288637506365e-09	3.217994048229945e-09	4.098252115900374e-09	2.509898904284954e-09
TraesCS1A01G044400.1	chr1A	1.1712249771560886e-10	3.005629645264393e-10	3.3706926857312607e-10	2.8004353142074045e-10	3.635757382974615e-10	2.6874055231599644e-10	2.730364047585251e-10	5.209900289879608e-10	4.3556251413361664e-10	3.796451943864295e-10	1.4428587913535516e-10	3.5097525035011593e-10	1.0744354068545488e-10	2.673486863755249e-10	2.6897429028045283e-10	2.1971454340205789e-10	2.7961110981408895e-10	2.7157806039723245e-10	3.8832277178441634e-10	2.333804700643281e-10	1.589679031845027e-10	2.732259097553727e-10	3.4796480229342803e-10	2.131046239487225e-10
TraesCS1A01G044500.1	chr1A	1.3118862170462022e-10	3.366598375268713e-10	0.37755045930359615	3.1367607095938255e-10	4.072402904888453e-10	3.0101563185648693e-10	3.058274056145073e-10	5.83559650433172e-10	4.878725010982514e-10	4.2523964874171903e-10	1.6161425844220232e-10	3.931265149217312e-10	1.2034724573424657e-10	2.994566062389541e-10	0.3012774414770255	2.461017198195779e-10	3.1319171658103194e-10	3.041939176812732e-10	4.3495938184834443e-10	2.614088906715254e-10	1.7805955747876017e-10	0.30603967000155163	3.8975451945567467e-10	2.3869796529269625e-10
TraesCS1A01G044500.2	chr1A	2.459349361555947e-10	6.311249754170413e-10	7.077812603333604e-10	5.880380743585225e-10	7.634397979030888e-10	5.64303971186961e-10	5.733244430586631e-10	1.0939798246787199e-09	9.145983153921887e-10	7.971825948411428e-10	3.0297286315964864e-10	7.369811733066054e-10	2.2561097000313425e-10	5.613813178292927e-10	5.647947763908024e-10	4.613586907551021e-10	5.871300713505745e-10	5.702621976798269e-10	8.154038545050297e-10	4.900545337122196e-10	3.3380231708684914e-10	5.737223674558532e-10	7.306598058062382e-10	4.474791189353747e-10
TraesCS1A01G044600.1	chr1A	52.649178081164834	28.95209232210545	28.860983434676687	50.953784601539155	70.04374845228149	25.88675984616165	14.611423915825107	16.72833227614877	9.32357506448507	60.94964014361668	77.21395784562947	60.103318991867965	41.39851779784157	48.64396370797245	54.69735820189098	30.57061227811442	17.955919660801484	26.160086255694846	12.468554090034067	24.978507788800304	11.909937043392393	64.33488683899327	74.48473748882618	77.5485657595278
TraesCS1A01G044700.1	chr1A	7.173102304538178e-10	1.8407811782997038e-09	2.064362009305634e-09	1.7151110502123571e-09	2.2266994105506755e-09	1.645886582628636e-09	1.6721962922544341e-09	3.1907744886462665e-09	2.6675784198938835e-09	2.325115901619999e-09	8.836708508823084e-10	2.1495284221442657e-09	6.580319958424748e-10	1.6373621770021037e-09	1.647318097806507e-09	1.345629514702381e-09	1.7124627081058426e-09	1.6632647432328281e-09	2.3782612423063365e-09	1.4293257233273072e-09	9.7359009150331e-10	1.6733569050795715e-09	2.1310911002681946e-09	1.305147430228176e-09
TraesCS1A01G044800.1	chr1A	9.267574036871032e-11	2.378270256201168e-10	2.6671343789478483e-10	2.2159057496283688e-10	2.876872623450485e-10	2.1264684530085737e-10	2.1604603259101218e-10	4.1224476597496986e-10	3.4464837466329245e-10	3.004025712687338e-10	1.1416936057910962e-10	2.777168504062359e-10	8.501705372641794e-11	2.1154550090466458e-10	2.1283179558223603e-10	1.738539424680079e-10	2.2124841189997967e-10	2.148920856889959e-10	3.0726889435482384e-10	1.8466740611463918e-10	0.12578683365334625	2.1619598256842012e-10	2.753347674765109e-10	0.33724739816040045
TraesCS1A01G044900.1	chr1A	1.566559590896472e-10	4.020148169060261e-10	4.5084343809149987e-10	3.745692660012428e-10	4.862968865555953e-10	3.594510857475788e-10	3.651969577842734e-10	6.968447075422567e-10	5.825820378317144e-10	5.077904177282212e-10	1.929880528498126e-10	4.694432370613539e-10	1.4370997239947279e-10	3.5758941016789457e-10	3.59763719491836e-10	2.938768656229418e-10	3.739908850510212e-10	3.6324636469535197e-10	5.193970196737935e-10	3.121555814109625e-10	2.1262583895971339e-10	3.6545042819015153e-10	4.6541664407701417e-10	2.850358377105942e-10
TraesCS1A01G045000.1	chr1A	1.6536352648781663e-10	4.243604150793375e-10	4.759031271452538e-10	3.953893302231356e-10	5.133272206699815e-10	3.7943082079041304e-10	3.8549607147258987e-10	7.355781351899692e-10	6.149642873730777e-10	5.360154486316597e-10	2.0371510394315513e-10	4.955367776459629e-10	1.5169794986122628e-10	3.774656658047883e-10	3.7976083197383613e-10	3.102117221393809e-10	3.947788005366953e-10	3.8343705658543685e-10	5.482671921300468e-10	3.2950644236541405e-10	2.244444370781196e-10	3.8576363078166356e-10	4.912863704511719e-10	3.008792743866185e-10
TraesCS1A01G045100.1	chr1A	3.8913755720821947e-10	9.986154674320274e-10	1.1199070574894943e-09	9.304399910736115e-10	1.2079743637707102e-09	8.928860303591154e-10	9.071589288902897e-10	1.7309807352511393e-09	1.4471492332154884e-09	1.2613648652549726e-09	4.793874417083048e-10	1.1661094514345025e-09	3.569793829163516e-10	8.882615788438177e-10	8.936626208715226e-10	7.299979284099717e-10	9.290032774534408e-10	9.023136039237766e-10	1.290195972318085e-09	7.754027432155374e-10	5.281682232386853e-10	9.077885561010334e-10	1.1561072876680984e-09	7.080365805939473e-10
TraesCS1A01G045200.1	chr1A	1.1759184105800293e-09	3.0176740627864e-09	3.3842000152551386e-09	2.81165745936452e-09	3.650326902542091e-09	2.6981747256207145e-09	2.7413053971384163e-09	5.230777850239781e-09	4.373079376875219e-09	3.8116654124918026e-09	1.4486407391513254e-09	3.523817085482403e-09	1.0787409767909422e-09	2.6842002901673835e-09	2.7005214718139457e-09	2.2059500241022644e-09	2.807315914927611e-09	2.7266635134964394e-09	3.898788921813666e-09	2.343156923487389e-09	1.596049330333295e-09	2.7432080411140523e-09	3.4935919676527782e-09	2.1395859511937312e-09
TraesCS1A01G045300.1	chr1A	2.113880836307911e-10	5.424698953731936e-10	6.083581559839787e-10	5.054354764869422e-10	6.561982545827138e-10	4.850353386921324e-10	4.927886912341161e-10	9.403068237660902e-10	7.861233064520285e-10	6.852011497897838e-10	2.604138067433129e-10	6.334563130091157e-10	1.9391905574925582e-10	4.825232348729185e-10	4.854571997465148e-10	3.9655093753508283e-10	5.046550220351206e-10	4.901566040961183e-10	7.008628415441071e-10	4.2121583202179977e-10	2.869126006394823e-10	4.931307185892647e-10	6.28022917564301e-10	3.8462105016547426e-10
TraesCS1A01G045300.2	chr1A	2.113880836307911e-10	5.424698953731936e-10	6.083581559839787e-10	5.054354764869422e-10	6.561982545827138e-10	4.850353386921324e-10	4.927886912341161e-10	9.403068237660902e-10	7.861233064520285e-10	6.852011497897838e-10	2.604138067433129e-10	6.334563130091157e-10	1.9391905574925582e-10	4.825232348729185e-10	4.854571997465148e-10	3.9655093753508283e-10	5.046550220351206e-10	4.901566040961183e-10	7.008628415441071e-10	4.2121583202179977e-10	2.869126006394823e-10	4.931307185892647e-10	6.28022917564301e-10	3.8462105016547426e-10
TraesCS1A01G045400.1	chr1A	3.549828785644714	0.9423794431296747	2.4659614449153247	2.9268106658913943e-10	1.8999141732047913	1.4043400878479635	0.8560731874463309	0.5445007665250923	1.820872642021009	3.174219661311452	4.071520985444709	3.3013235156054472	1.4597979431075434	2.5147200673474903	2.8111230340806115	1.8370368803693988	1.753374786748723	1.1353342960059005	2.029233142305451	0.48782447919521166	1.1629915770472283	1.1422231436845807	2.5456719631413742	2.895378258408095
TraesCS1A01G045500.1	chr1A	1.938676298523832e-09	4.975084265674876e-09	5.57935678190712e-09	4.635435270844208e-09	6.018106515001826e-09	4.448342115212529e-09	4.519449438525497e-09	8.623714834179098e-09	7.2096714051186036e-09	6.284097031405403e-09	2.388299596979212e-09	5.809536276065583e-09	1.77846485362831e-09	4.4253031810867665e-09	4.4522110751527205e-09	3.6368365262226517e-09	4.628277589475249e-09	4.495310116845481e-09	6.4277330873144225e-09	3.863042495479209e-09	2.6313245716305672e-09	4.522586229944788e-09	5.759705676400525e-09	3.5274254871031784e-09
TraesCS1A01G045600.1	chr1A	9.535881941040415e-10	2.4471241661295916e-09	2.7443512679100012e-09	2.280059003236516e-09	2.9601616979255654e-09	2.1880323845875513e-09	2.223008364887726e-09	4.241797695393855e-09	3.546263778293198e-09	3.0909960287415056e-09	1.1747470691197602e-09	2.857571019098728e-09	8.747840417403652e-10	2.176700087595116e-09	2.1899354328299202e-09	1.7888723238288671e-09	2.2765383121052555e-09	2.211134813751175e-09	3.1616471463452034e-09	1.9001375937881483e-09	1.2942852028847545e-09	2.224551277062946e-09	2.83306054688534e-09	1.735055667954739e-09
TraesCS1A01G045700.1	chr1A	4.416559805494273	1.9541201472057963	3.5063473623162285	1.0924274208815674	5.200359558022108	2.446115940561855	1.4201242400615568	0.6774468135535119	0.5663648455544505	3.4555862661709362	7.879867460284633	5.476505534581893	3.353029278317925	1.3905411273133284	0.34974906570144904	1.9998740136437998	4.362962314009039	2.4719433554762333	1.514816078407064	1.517330916786807	1.8603632323786365	0.7105549494336518	0.9049219113943695	5.819128670084256
TraesCS1A01G045800.1	chr1A	4.879878402218316	1.4732797343691286	4.956671788398555	2.7453978578515277	2.673227394615764	3.293236826727505	3.345879642796767	5.107509187193533	4.27002326101325	8.37413908635598	8.840637681479432	8.601936772446852	3.686617673724949	2.6209443480129835	1.9776606783282142	1.0769822710873067	0.6852896571082591	6.656017202799223e-10	1.9034549747851672	1.7159535145709748	0.7792183928778075	6.696403799784858e-10	8.528154692047023e-10	3.6560377108102005
TraesCS1A01G045900.1	chr1A	5.008372439165524e-10	1.285262265686372e-09	1.441369905643965e-09	1.197517412871312e-09	1.5547164231928687e-09	1.1491838047833763e-09	1.1675536563452215e-09	2.227848750800341e-09	1.8625450565589568e-09	1.6234323595484868e-09	6.169928361474613e-10	1.500834429736105e-09	4.594482515579731e-10	1.1432319311884353e-09	1.1501833111139303e-09	9.39539614609886e-10	1.195668298910208e-09	1.1613175088514704e-09	1.660539269259661e-09	9.97977619080354e-10	6.797758590791147e-10	1.1683640144077692e-09	1.4879612026698022e-09	9.112743888327063e-10
TraesCS1A01G046000.1	chr1A	3.6869172324867845e-10	9.461468078068151e-10	1.0610655673187156e-09	0.8815533676383333	1.1445056936011466e-09	8.459725438982137e-10	8.594955242884013e-10	1.6400325755463391e-09	1.3711139793857768e-09	1.1950909831284977e-09	4.5419975202403064e-10	1.1048404225755791e-09	3.382231846134936e-10	8.415910675624748e-10	8.467083312540583e-10	6.916428116688424e-10	8.801921400886682e-10	8.549047795028814e-10	1.222407263321361e-09	7.346619937147781e-10	5.00417522760125e-10	8.600920700009221e-10	1.0953637865456168e-09	6.708353439208216e-10
TraesCS1A01G046100.1	chr1A	1.2334337168674742e-10	0.6330542840267808	0.3549724513246077	2.949178343888272e-10	0.38288679241490975	2.8301450599269624e-10	2.8753852942854237e-10	5.486620251779977e-10	4.586970916898157e-10	0.39980976567646237	1.519495158185093e-10	0.36961703895002196	1.1315032408449129e-10	2.815487121325742e-10	2.8326065877452355e-10	2.3138451723961468e-10	2.9446244503157397e-10	2.860027261959391e-10	4.0894824571564824e-10	2.457762993875767e-10	1.674113646069887e-10	2.877380998417299e-10	3.6644669282410685e-10	2.244235168523803e-10
TraesCS1A01G046100.2	chr1A	1.701579355320074e-10	4.366639590062555e-10	4.897010565037087e-10	4.0685291122591494e-10	5.282101922761223e-10	3.9043171438212235e-10	3.966728157693702e-10	7.569048602481918e-10	6.327940374023445e-10	5.515562233679491e-10	2.09621445913041e-10	5.099039483209907e-10	1.560961508324268e-10	3.884095833689756e-10	3.907712936283226e-10	3.192057362235485e-10	4.062246803624824e-10	3.9455410356076574e-10	5.64163183467502e-10	3.39059871110853e-10	2.3095178765234024e-10	3.96948132464843e-10	5.055303084452754e-10	3.0960271144052674e-10
TraesCS1A01G046200.1	chr1A	12.911584150320651	5.5223435348991116e-09	12.386172062026892	15.43599945705655	6.680098231652026e-09	4.9376597478859075e-09	5.016588881779891	9.572323465938799e-09	8.002735259681651e-09	20.926043121555345	10.604050213238713	6.448585272881383	1.9740959895015207	14.736259597931019	4.94195429341952e-09	4.036888544107143e-09	5.137388124317527e-09	4.989794229698484e-09	7.134783726919009e-09	4.2879771742698995	2.9207702774307003	5.0200707202587855	6.393273300804584e-09	7.830884585284499
TraesCS1A01G046300.1	chr1A	0.5903787906445641	0.7575231190206151	1.2742975370331822	0.7058070169011986	2.7490116184219655	1.354639162995973	1.0322199338344646	1.3130759219101453	5.488844485378361e-10	2.3920945494701877	0.5454758340597935	4.4228979879511643e-10	0.5415901201703562	0.3369057980739642	0.33895434145140424	0.5537570022120147	0.7047171641819234	0.34223554421730307	4.893541650836084e-10	0.8822998295084871	0.40065435884366457	1.0329363615045415	0.4384961116047913	0.8056465621377933
TraesCS1A01G046400.1	chr1A	2.911511759402321	0.4981067534956214	5.586066772023665e-10	0.928202012004162	6.025344165651256e-10	1.3361075690254403	2.26244236820503	1.7268172226202574	0.7218342093521695	6.291654574437762e-10	0.9564687504424576	1.1633046186994147	0.7122414869588509	0.4430625257893925	0.44575655126531644	1.092363106105681	0.9267687540985367	4.500716382770732e-10	1.9306390127382873	1.1603065106043664	0.26344891257643116	0.45280253039014906	1.7299897692850592	1.7658338656648902
TraesCS1A01G046500.1	chr1A	4.623494765178202	4.550935514059574	4.0100429496820835	3.9373686428443793	5.898252142340064	4.069100547799756	2.805313116752261	2.8173227117323747	6.3594776420898835	8.41722523024336	6.944180825710607	9.2999316607963	5.171035305363922	6.072038682640354	6.981667990456556	4.158474415219864	3.7800854443169496	3.2309076736492623	4.1998138294569305	3.912311162770358	5.157840178755515	6.501023588998042	9.031996029971939	8.297219020892813
TraesCS1A01G046500.2	chr1A	8.765501797806328e-11	2.2494271017918991e-10	2.52264196656493e-10	2.0958587171637767e-10	2.7210176096342264e-10	2.0112666997498607e-10	2.0434170577447262e-10	3.899113428080977e-10	3.259769963210448e-10	2.841282160839103e-10	1.0798421803042468e-10	2.626714976143706e-10	8.041124185447758e-11	2.0008499107968682e-10	2.0130160054661999e-10	1.644353785787024e-10	2.0926224538971602e-10	2.0325027412213788e-10	2.9062255506798415e-10	1.7466302118052633e-10	1.189723126073291e-10	2.044835321889497e-10	2.604184643912254e-10	1.5948848434560197e-10
TraesCS1A01G046600.1	chr1A	4.883899860093402	4.641925078832736	4.68515894570848	9.515045894017447	12.353221723426003	9.546049947294495	9.27696458059478	9.655467772555722	6.726871891691166	2.931639551522163	8.022116998986297	7.046646831331601	3.9824856012299477	3.7160643416056787	3.323253097699477	12.894516504352056	13.818695991871525	11.324554010102172	10.195404037385089	5.406527673355293	5.6467679728200455	3.797755935178076	8.598406233056874	8.228023866995963
TraesCS1A01G046700.1	chr1A	3.8336057447056774e-10	9.837904159558987e-10	1.10328135889256e-09	9.166270458379582e-10	1.1900412526696009e-09	8.796305964167295e-10	8.936916051241038e-10	1.705283277780071e-09	1.4256654263090827e-09	1.2426391398206648e-09	0.47227064524310064	1.1487978503146315e-09	3.516798077542918e-10	8.7507479768521e-10	8.803956579725986e-10	7.191606670024602e-10	9.152116611016973e-10	8.889182119415351e-10	1.2710422316364033e-09	7.638914198305086e-10	5.203272460528379e-10	8.943118851375383e-10	1.1389441747276575e-09	6.975253486967687e-10
TraesCS1A01G046800.1	chr1A	2.937121052813631e-10	0.7537320573823644	8.452801675955737e-10	7.022747703326303e-10	9.117513509989117e-10	6.739299018952558e-10	6.847027584299321e-10	1.306504567689554e-09	1.092275058191308e-09	9.520492772784347e-10	3.6183064867792434e-10	1.7603053511347835	0.26943985298018935	0.6704394726003273	6.745160546068498e-10	5.509856975578449e-10	7.011903718358773e-10	6.810456182482007e-10	9.738103357942232e-10	5.852562106435744e-10	3.9864926403684206e-10	0.6851779872964676	8.726032712654118e-10	5.344097757986163e-10
TraesCS1A01G046900.1	chr1A	6.119234193444891e-10	1.570334654473681e-09	1.7610671169431952e-09	1.4631279101337643e-09	1.8995540014214571	1.4040738619580779e-09	1.4265181640085218e-09	2.7219877154328337e-09	2.2756593155492842e-09	1.983511195694786e-09	7.53842432032301e-10	1.8337209288434495e-09	5.613543092495045e-10	1.3968018571581927e-09	1.4052950597401478e-09	1.1479303928371654	1.4608686609433726e-09	1.4188988330896165e-09	2.028848453152325e-09	1.2193300009427265e-09	8.305507889601695e-10	1.4275082602574542e-09	1.81799240781173e-09	1.1133959120429937e-09
TraesCS1A01G047000.1	chr1A	0.6596967172875046	0.6771727207431372	1.5188439066744757	4.416594979403086	4.914848484764219	5.752025457680558	1.5378874548640773	2.934495238459002	2.943985994242344	1.7106922640352753	2.438086345331385	1.5815046641434565	0.7262155688006524	0.6023404700750895	0.30300148978304564	3.2176303542262263	2.8348554950334233	3.3652812097898908	2.187242099431627	2.6290479279035677	1.0744709779264467	0.9233729093032627	1.1759546234706941	1.440383430289553
TraesCS1A01G047100.1	chr1A	1.5254707169386487e-10	3.914704774266857e-10	4.390183857218977e-10	3.647447885612291e-10	4.735419351360132e-10	3.50023139027829e-10	3.556183041183816e-10	6.785673534455671e-10	5.673016488432172e-10	4.94471718208412e-10	1.879262206507745e-10	4.571303355221738e-10	1.3994064183795543e-10	3.4821029284071207e-10	3.503275727849377e-10	2.861688476446463e-10	3.6418157781078884e-10	3.537188726156771e-10	5.05773893685185e-10	3.039681358682837e-10	2.0704893250306687e-10	3.558651263165441e-10	4.5320935497196964e-10	2.7755970869691836e-10
TraesCS1A01G047200.1	chr1A	1.3821006367125585e-10	3.5467845439300655e-10	3.9775761258297386e-10	3.304645568809937e-10	4.290364952891475e-10	3.171265091770012e-10	3.221958173900644e-10	6.147927723788568e-10	5.139842812897656e-10	4.479992103314064e-10	1.702641331179785e-10	4.141673260393576e-10	1.2678843850529382e-10	3.1548404181158074e-10	3.1740233098391267e-10	2.592735095765667e-10	3.2995427901846673e-10	3.2047490235699965e-10	4.582391603673096e-10	2.75399946691196e-10	1.875896130064181e-10	3.2241944221186353e-10	4.1061485554300474e-10	2.514734933002266e-10
TraesCS1A01G047200.2	chr1A	1.3821006367125585e-10	3.5467845439300655e-10	3.9775761258297386e-10	3.304645568809937e-10	4.290364952891475e-10	3.171265091770012e-10	3.221958173900644e-10	6.147927723788568e-10	5.139842812897656e-10	4.479992103314064e-10	1.702641331179785e-10	4.141673260393576e-10	1.2678843850529382e-10	3.1548404181158074e-10	3.1740233098391267e-10	2.592735095765667e-10	3.2995427901846673e-10	3.2047490235699965e-10	4.582391603673096e-10	2.75399946691196e-10	1.875896130064181e-10	3.2241944221186353e-10	4.1061485554300474e-10	2.514734933002266e-10
TraesCS1A01G047200.3	chr1A	1.488538638248642e-10	3.8199286614473906e-10	4.2838962609524347e-10	3.5591421378628577e-10	4.6207735058695124e-10	3.4154897956324003e-10	3.4700868412012696e-10	6.621390453727552e-10	5.535671150344696e-10	4.825004176753514e-10	1.8337647355178178e-10	4.460630804541939e-10	1.3655263921102772e-10	3.397800228964476e-10	3.418460428927498e-10	2.792406186839158e-10	3.553646385278437e-10	3.4515523839279346e-10	4.935289642784649e-10	2.966089810916708e-10	2.020362191268109e-10	3.4724953068287166e-10	4.4223702795512455e-10	2.7083990943171744e-10
TraesCS1A01G047300.1	chr1A	2.247838465906811e-10	5.768464695228877e-10	6.469101004091472e-10	5.374651620283709	3.488909244248631	8.7681283829037	5.240169439515985e-10	9.998945124587884e-10	8.359403126408409e-10	1.4572453429695693	0.830749059254017	6.735987395298883e-10	2.062077981400513e-10	5.131009607597122e-10	5.162208523766909e-10	4.21680558228462e-10	0.5366352502912517	5.212180602052734e-10	7.452768516976681e-10	4.4790847875855726e-10	3.0509438800591186e-10	5.243806457422057e-10	6.678210272428187e-10	4.0899466824699115e-10
TraesCS1A01G047400.1	chr1A	1.1054438483021165e-09	2.8368203090235167e-09	3.181379808861423e-09	2.6431505910806878e-09	3.4315573107801507e-09	2.536469048571528e-09	2.5770148339537515e-09	4.91728945168089e-09	4.110994140247423e-09	3.5832265607157526e-09	1.361821516770681e-09	3.312629417688081e-09	1.014090404551759e-09	2.5233321220922836e-09	2.538675150729206e-09	2.0737441151235325e-09	2.6390692419439352e-09	2.56325046046155e-09	3.665128626841957e-09	2.2027279982783845e-09	1.5003956889605803e-09	2.578803449608929e-09	3.284215736714684e-09	2.011357341105066e-09
TraesCS1A01G047500.1	chr1A	0.4590513446008266	0.7853534303380352	0.4403711330251237	1.8293433817253395	0.47500105984821933	1.0533049951596622	0.7134281411621137	1.361316445232277	1.1380993501326881	1.4879860005846417	0.5655158327038484	0.45853889117431024	1.263346567176173	0.6985664660055493	3.5140703674469215e-10	0.8611518584753486	2.5571261110708754	3.5480878618382207e-10	5.073323342203611e-10	0.6098095053983281	1.0384345609483587	1.0708849597584416	0.9092116573597375	1.1136598127509045
TraesCS1A01G047600.1	chr1A	1.4739251310694886e-09	3.782427078698022e-09	4.241839745148564e-09	3.524200788107583e-09	4.575409747706867e-09	3.3819587314287036e-09	3.4360197786050014e-09	6.556385935574519e-09	5.4813255203298974e-09	4.77763541428767e-09	1.8157620223609077e-09	4.416839223584108e-09	1.3521205394023455e-09	3.3644428294563777e-09	3.384900200972274e-09	2.7649921534980437e-09	3.5187589892585804e-09	3.4176672806154e-09	4.886838169122609e-09	2.9369706643711794e-09	2.0005275852807734e-09	3.438404599478572e-09	4.378954315619577e-09	2.6818097881400877e-09
TraesCS1A01G047700.1	chr1A	4.159659841549201e-10	1.0674633121583334e-09	1.1971171445715662e-09	9.945875935509803e-10	1.2912561014791287e-09	9.544445388954717e-10	9.697014581372362e-10	1.8503202575912625e-09	1.5469204754539272e-09	1.3483275202693295e-09	5.124379934240191e-10	1.2465048839754118e-09	3.8159071923854853e-10	9.49501262436787e-10	9.552746701197527e-10	7.803263938351437e-10	9.930518281541612e-10	9.645220804829544e-10	1.3791463389663034e-09	8.288615663624848e-10	5.645818829593936e-10	9.703744939250092e-10	1.235813138042123e-09	7.568509582508753e-10
TraesCS1A01G047800.1	chr1A	1.1385876673870124e-09	2.921874886190006e-09	3.2767650941359274e-09	2.7223984924005668e-09	3.534443508810596e-09	2.612518385124819e-09	2.654279828975292e-09	5.064721410549629e-09	4.2342514601490205e-09	3.6906601613015865e-09	1.4026521442576323e-09	3.4119498764194696e-09	1.0444952314959916e-09	2.598987582543022e-09	2.6147906314388996e-09	2.1359198646069543e-09	2.7181947747711782e-09	2.6401027670362348e-09	3.775017844930693e-09	2.268770989408424e-09	1.5453810976243013e-09	2.6561220715548754e-09	3.382684286139991e-09	2.0716625876637715e-09
TraesCS1A01G047900.1	chr1A	7.369625655347443e-10	1.891213539349011e-09	2.120919872574282e-09	1.7621003940537916e-09	2.2877048738534336e-09	1.6909793657143518e-09	1.7180098893025007e-09	3.2781929677872596e-09	2.7406627601649487e-09	2.388817707143835e-09	9.078810111804539e-10	2.208419611792054e-09	6.760602697011727e-10	1.6822214147281889e-09	1.692450100486137e-09	1.3824960767490218e-09	1.7593794946292902e-09	1.7088336403077e-09	2.4434190845613045e-09	1.4684853321855897e-09	1.0002637926403867e-09	1.719202299739286e-09	2.1894771578097886e-09	1.3409048940700438e-09
TraesCS1A01G048000.1	chr1A	3.211836852778289e-10	8.242303783431511e-10	9.243411981965529e-10	7.679601717368764e-10	9.970295868137355e-10	7.369641414755087e-10	7.487446084721348e-10	1.4287049949162387e-09	1.194438098459948e-09	1.041096672367164e-09	3.9567351532043667e-10	9.624754129004176e-10	2.946411921682723e-10	7.331472434337779e-10	7.37605118420824e-10	6.025206782249469e-10	7.667743469130639e-10	7.447454074176843e-10	1.0648930935700014e-09	6.399965925346152e-10	4.359358618671537e-10	7.492642858565247e-10	9.542198956424754e-10	5.843943717439595e-10
TraesCS1A01G048100.1	chr1A	3.221453130780619e-10	8.266981339669329e-10	9.271086868139078e-10	7.702594536881843e-10	1.0000147053371298e-09	7.391706209410042e-10	7.509863587969016e-10	1.4329825547812573e-09	1.1980142604313849e-09	1.044213728272455e-09	3.96858166563911e-10	9.65357075813293e-10	2.9552335142626117e-10	7.353422950608251e-10	7.398135169789702e-10	6.043246323513688e-10	7.690700784906478e-10	7.469751840865995e-10	1.0680813962453607e-09	6.419127499972937e-10	4.372410590583727e-10	7.515075921016041e-10	9.57076841437812e-10	5.861440554916959e-10
TraesCS1A01G048200.1	chr1A	2.2925397990356393e-10	5.883178481781725e-10	6.5977478990592e-10	5.481533896275289e-10	7.116581922924744e-10	5.260290924594361e-10	5.344377354506359e-10	1.019778778331548e-09	8.525641256763121e-10	7.431123265120736e-10	2.824232122848287e-10	6.869941690091758e-10	2.103085213985182e-10	5.233046730475474e-10	5.264866079637273e-10	4.3006625114777807e-10	5.473069734713274e-10	5.315831920843555e-10	7.600976981802923e-10	4.5681574964296033e-10	3.1116160594921126e-10	5.348086699473062e-10	6.811015590345792e-10	4.1712808494508465e-10
TraesCS1A01G048300.1	chr1A	2.1447814199615815e-10	5.503996878636988e-10	6.172510991279304e-10	5.12823902056851e-10	6.657905214271122e-10	4.921255562676984e-10	4.999922468534852e-10	9.5405217268493e-10	7.976148099350481e-10	6.952173792219267e-10	2.6422052019736797e-10	6.427161395115745e-10	1.9675375290971006e-10	4.895767306650808e-10	4.925535840617462e-10	4.0234769542596113e-10	5.120320389685243e-10	4.973216840231047e-10	7.111080126497351e-10	4.2737313986530777e-10	2.9110667187806606e-10	5.003392739440579e-10	6.372033190170681e-10	3.9024341767619884e-10
TraesCS1A01G048400.1	chr1A	0.23892642785122697	6.131395486564521e-10	6.876113280440677e-10	5.71280512654005e-10	7.416837414861614e-10	5.482227699355189e-10	5.569861817279759e-10	1.0628042338199998e-09	8.885346328291988e-10	7.744649561280531e-10	0.29433892175772813	7.159791191450183e-10	2.1918164184242314e-10	5.453834046269036e-10	5.48699588462567e-10	4.4821116329835053e-10	5.703983853794442e-10	5.540112024091582e-10	7.921669570968552e-10	4.760892490727523e-10	3.242898158227161e-10	5.573727663107381e-10	7.098378942418117e-10	4.3472712331804534e-10
TraesCS1A01G048500.1	chr1A	2.950544823621737e-10	7.571769014943937e-10	8.491434224748952e-10	7.054844356449366e-10	9.15918404705488e-10	6.770100202768611e-10	6.878321129017324e-10	1.3124757951470016e-09	1.097267174545016e-09	9.564005079789758e-10	3.6348435365360037e-10	8.841753107540398e-10	2.706712962788973e-10	6.735036377065325e-10	6.775988519313784e-10	5.535039137258423e-10	7.043950810307395e-10	6.841582581853497e-10	9.782610228865186e-10	5.879310562132433e-10	4.0047124421982576e-10	6.883095130583246e-10	8.765914032181787e-10	5.368522336404746e-10
TraesCS1A01G048600.1	chr1A	0.1856046021907082	1.1907590458346392e-10	1.3353883478581693e-10	0.11094659287966085	0.43212020487967034	0.10646862113469921	1.0817053568813273e-10	0.4128077396992004	0.17255951845793974	1.5040640490605902e-10	0.17148791045623063	0.27809610880430197	0.3830991998071066	0.21183439373804447	0.4262448899292755	0.34818272508730236	0.22155055531745366	0.2151855487181793	0.4615327647788071	0.2773793900862591	0.6297930586074908	0.7577192915623748	0.8271323182179424	0.7598428941294371
TraesCS1A01G048700.1	chr1A	1.036242708520764e-09	2.659234446981916e-09	2.9822244144991923	2.477688515555572e-09	3.216740724718519	4.755370546088029	2.415692880471858	4.609465558031038	3.853644591180282	3.3589154277014437e-09	1.27657105391554	3.105257752696371e-09	2.8518240599789904	2.36537072119084e-09	2.37975327130956e-09	1.9439270697322786	2.473862660185005e-09	2.402790158763315e-09	3.43569040163104	2.0648365205152004	5.625881750061231	4.834739054011638	3.0786227772734752e-09	1.8854457277367436
TraesCS1A01G048800.1	chr1A	2.01115017884248e-09	5.161068724204777e-09	5.787930867212058e-09	4.808722570688851e-09	6.243082459487875e-09	4.614635278398044e-09	4.688400819404955e-09	8.946096697139062e-09	7.479191831478178e-09	6.5190165465981286e-09	2.477581824903669e-09	6.026715202273642e-09	1.8449495210536675e-09	4.590735075706833e-09	4.618648872354692e-09	3.7727930318758345e-09	4.801297312446287e-09	4.663359093176153e-09	6.668022174690662e-09	4.007455299048525e-09	2.7296918453363827e-09	4.691654874054873e-09	5.975021776452882e-09	3.6592918604528298e-09
TraesCS1A01G048900.1	chr1A	9.737242947336894e-10	2.4987979795923586e-09	2.802301370098146e-09	2.3282050455371363e-09	3.0226688831004643e-09	2.234235180038872e-09	2.2699497179924446e-09	4.331368084135203e-09	3.6211471763265388e-09	3.156265929800904e-09	1.1995531912429526e-09	2.9179118852637092e-09	8.932561029535857e-10	2.2226635886906388e-09	2.236178413312e-09	1.826646400048481e-09	2.324610011003406e-09	2.2578254433024816e-09	3.228408926207697e-09	1.940261162887747e-09	1.3216155088280225e-09	2.2715252105152556e-09	2.892883846517911e-09	1.771693344201144e-09
TraesCS1A01G049000.1	chr1A	8.3950482107729e-10	2.1543602866966623e-09	2.4160283593954105e-09	2.0072821133824724e-09	2.606020116379204e-09	1.926265181229873e-09	1.957056778971379e-09	3.734326449651027e-09	3.122003352281528e-09	2.7212019654850447e-09	1.0342051570794246e-09	2.5157029647982306e-09	7.701284736777989e-10	1.916288633682566e-09	1.927940556600593e-09	1.5748589898987555e-09	2.004182623270817e-09	1.9466037307016193e-09	2.7834006737005236e-09	1.6728129401750018e-09	1.1394422397307918e-09	1.9584151034741412e-09	2.494124824761216e-09	1.5274807375882424e-09
TraesCS1A01G049100.1	chr1A	5.922745022095744e-10	1.5199110646511319e-09	1.7045190902523586e-09	1.416146738707451e-09	1.8385591463262457e-09	1.3589889214364885e-09	1.3807125348889823e-09	2.634584440166642e-09	2.2025876861509133e-09	1.9198204692275224e-09	7.296364823798878e-10	1.7748399815870086e-09	5.433291708791076e-10	1.351950421377884e-09	1.3601709064457397e-09	1.1110702414973789e-09	1.4139600342158334e-09	1.373337861384904e-09	1.9637019431887185e-09	1.1801772027473177e-09	8.038817269293384e-10	1.3816708390565272e-09	1.7596165048086012e-09	1.0776446671608793e-09
TraesCS1A01G049200.1	chr1A	1.0868336825057846e-09	2.789062391363188e-09	3.127821226220658e-09	2.598653106382359e-09	3.3737869856828416e-09	2.493767549437327e-09	2.5336307458400515e-09	4.8345068009791915e-09	4.0417854846877025e-09	3.522902881242423e-09	1.3388952286095582e-09	3.2568612456731297e-09	9.970181755189011e-10	2.480851783336521e-09	2.49593651182804e-09	2.038832598033911e-09	2.594640466827034e-09	2.5200980958073154e-09	3.6034261247065707e-09	2.165645035344405e-09	1.4751365022777422e-09	2.535389250120563e-09	3.2289259094972646e-09	1.9774961064063276e-09
TraesCS1A01G049300.1	chr1A	0.3299663723567762	0.7056406256074087	1.5826951261273219	0.7889598494497256	2.0485862199464457	0.8833022806066704	0.5128125610035726	0.24462876247153392	1.0225830898648347	0.534782599579743	0.47424195939635805	1.3183920812141825	0.5549464826162986	0.6276624753371746	1.3892536987619901	1.0316607576056305	1.3129026641531474	1.6577389468712007	1.0940123273357742	0.8766628511153424	1.4182119912754771	2.052673944514171	2.1240110635536125	1.3008113923540585
TraesCS1A01G049300.2	chr1A	6.164812904969787e-11	1.5820311883782786e-10	1.7741843089907094e-10	1.4740259216874727e-10	1.9137027019629564e-10	1.4145320133362988e-10	1.4371434902874242e-10	2.7422622610596253e-10	2.2926094135833602e-10	1.9982852477635594e-10	7.594573775726486e-11	1.8473792780078678e-10	5.655355197271078e-11	1.407205843489203e-10	1.4157623071293508e-10	1.1564806753553694e-10	1.4717498446287797e-10	1.429467407285662e-10	2.0439601967873403e-10	1.2284120998802297e-10	8.36737091628131e-11	1.4381409612028403e-10	1.8315336041265997e-10	1.1216889679195553e-10
TraesCS1A01G049300.3	chr1A	6.164812904969787e-11	1.5820311883782786e-10	1.7741843089907094e-10	1.4740259216874727e-10	1.9137027019629564e-10	1.4145320133362988e-10	1.4371434902874242e-10	2.7422622610596253e-10	2.2926094135833602e-10	1.9982852477635594e-10	7.594573775726486e-11	1.8473792780078678e-10	5.655355197271078e-11	1.407205843489203e-10	1.4157623071293508e-10	1.1564806753553694e-10	1.4717498446287797e-10	1.429467407285662e-10	2.0439601967873403e-10	1.2284120998802297e-10	8.36737091628131e-11	1.4381409612028403e-10	1.8315336041265997e-10	1.1216889679195553e-10
TraesCS1A01G049400.1	chr1A	7.825202514041649e-10	2.008124921781495e-09	2.252031282878874e-09	1.8710302365952987e-09	2.429126629691646e-09	1.7955126355948754e-09	1.8242141370048372e-09	3.480844896705018e-09	2.9100855489751456e-09	2.536490074494545e-09	9.64004564598882e-10	2.3449400968846538e-09	7.178530863736089e-10	1.7862132840022949e-09	1.7970742885161891e-09	1.4679594705844158e-09	1.8681411361154645e-09	1.814470628981267e-09	2.594466809788731e-09	1.5592644254479717e-09	1.0620982816399746e-09	1.8254802600868057e-09	2.3248266548380304e-09	1.423797196612556e-09
TraesCS1A01G049500.1	chr1A	7.844218802046611e-10	2.013004933742082e-09	2.2575040198968053e-09	1.8755770901471706e-09	2.4350297320724277e-09	1.7998759712828341e-09	1.8286472211773883e-09	3.4893038150445198e-09	2.9171574458134812e-09	2.5426540843961114e-09	9.66347224537154e-10	2.3506386147385652e-09	7.195975653198388e-10	1.790554021022957e-09	1.8014414192294726e-09	1.4715268083015104e-09	1.872680968767021e-09	1.8188800351270296e-09	2.600771710906079e-09	1.5630536464089629e-09	1.0646793224216024e-09	1.8299164211076726e-09	2.330476294339459e-09	1.427257214101286e-09
TraesCS1A01G049600.1	chr1A	3.069801271556995e-10	7.877808181025838e-10	8.834644832977038e-10	7.339990229154169e-10	9.529384067977214e-10	7.043737158182466e-10	7.156332206509705e-10	1.3655240322309272e-09	1.1416170127933883e-09	9.950567339315262e-10	3.781758277670365e-10	9.199123061958342e-10	2.8161141048893364e-10	7.007256106999018e-10	7.049863471354523e-10	5.758756838954556e-10	7.328656382763949e-10	7.118108744220378e-10	1.0178008169641955e-09	6.116943181143968e-10	4.1665767111411266e-10	7.161299165818424e-10	9.120218688736924e-10	5.585509687139128e-10
TraesCS1A01G049600.2	chr1A	3.069801271556995e-10	7.877808181025838e-10	8.834644832977038e-10	7.339990229154169e-10	9.529384067977214e-10	7.043737158182466e-10	7.156332206509705e-10	1.3655240322309272e-09	1.1416170127933883e-09	9.950567339315262e-10	3.781758277670365e-10	9.199123061958342e-10	2.8161141048893364e-10	7.007256106999018e-10	7.049863471354523e-10	5.758756838954556e-10	7.328656382763949e-10	7.118108744220378e-10	1.0178008169641955e-09	6.116943181143968e-10	4.1665767111411266e-10	7.161299165818424e-10	9.120218688736924e-10	5.585509687139128e-10
TraesCS1A01G049700.1	chr1A	2.5436532994816235e-10	6.527592830850015e-10	7.320432657112178e-10	6.081954078767224e-10	7.89609720053431e-10	5.836477243363956e-10	5.929774086008632e-10	1.1314803151227895e-09	9.45949794288611e-10	8.24509184971631e-10	3.1335845775968384e-10	7.622441213277538e-10	2.333446793767641e-10	5.806248854617389e-10	5.841553538320946e-10	4.771735867738941e-10	6.072562794701569e-10	5.898101926357546e-10	8.433550504632399e-10	5.068530933784777e-10	3.45244713299046e-10	5.933889734324722e-10	7.557060639248917e-10	4.6281823766956594e-10
TraesCS1A01G049700.2	chr1A	2.677640843668337e-10	6.871435339982304e-10	7.706038193177398e-10	6.402322460353054e-10	8.312026003714674e-10	6.143915074101088e-10	6.242126350182459e-10	1.1910813105689092e-09	9.957779253025694e-10	8.679404029274158e-10	3.2986468925511305e-10	8.023955122064867e-10	2.456361660133668e-10	6.112094397768119e-10	6.149258764105583e-10	5.023088192584583e-10	6.392436488159512e-10	6.208785851968252e-10	8.877789788783504e-10	5.335517009517115e-10	3.634305609095723e-10	6.246458791255141e-10	7.955130610706657e-10	4.87197298716449e-10
TraesCS1A01G049800.1	chr1A	5.287298995974087e-10	1.356841163365875e-09	1.5216427587019417e-09	1.2642096193211476e-09	1.6413017768186795e-09	1.2131842132397808e-09	1.232577119597863e-09	2.3519222275033903e-09	1.966274019577801e-09	1.7138446449287463e-09	6.513544355397851e-10	1.5844189843815226e-09	4.850358691713574e-10	1.2069008675691182e-09	1.21423938413256e-09	9.918645071516323e-10	1.2622575244023409e-09	1.2259936682305856e-09	1.7530181147221153e-09	1.0535570442216022e-09	7.176339740810638e-10	1.2334326081667603e-09	1.570828820836507e-09	9.620251328463215e-10
TraesCS1A01G049900.1	chr1A	1.8083451187911372e-09	4.640624819242951e-09	5.204273973039415e-09	4.323809370283254e-09	5.6135279257580055e-09	4.149293905786477e-09	4.215620904843111e-09	8.043969299108236e-09	6.724987613177857e-09	5.861636726773108e-09	2.2277416408797697e-09	5.418979215489746e-09	1.6589041911995165e-09	4.127803807568329e-09	4.152902767579429e-09	3.392343314375751e-09	4.317132877577755e-09	4.193104394704609e-09	5.995616577242866e-09	3.603342159648674e-09	2.4544288021091846e-09	4.218546819528332e-09	5.372498572104692e-09	3.2902876392306964e-09
TraesCS1A01G050000.1	chr1A	9.3022940548766e-10	2.3871802024059562e-09	2.677126525036125e-09	2.22420741382006e-09	2.887650532414421e-09	2.134435049518404e-09	2.1685542694942226e-09	4.137891988157982e-09	3.459395645395526e-09	3.0152799876916418e-09	1.1459708440836852e-09	2.787572881743284e-09	8.533556142049384e-10	2.1233803448154084e-09	2.136291481305268e-09	1.7450526847725404e-09	2.220772964402389e-09	2.1569715690339267e-09	3.0842004583223385e-09	1.8535924365916086e-09	1.262580810306886e-09	2.1700593869907986e-09	2.7636628101460737e-09	1.6925543043304876e-09
TraesCS1A01G050100.1	chr1A	1.5932359511560615e-10	4.088605776085226e-10	4.585206832120116e-10	3.8094766663156997e-10	4.945778552555794e-10	3.65572044512777e-10	3.7141576086598984e-10	7.087110167279466e-10	5.925026105391153e-10	5.164373917714707e-10	1.962743745789925e-10	4.774372112363868e-10	1.461571560360877e-10	3.6367866715249097e-10	3.658900019807147e-10	2.9888118539786355e-10	3.803594366473984e-10	3.694319518532935e-10	5.282416382220393e-10	3.17471162634397e-10	2.1624656524012314e-10	3.7167354752507764e-10	4.733420508986612e-10	2.898896069114903e-10
TraesCS1A01G050100.2	chr1A	1.5932359511560615e-10	4.088605776085226e-10	4.585206832120116e-10	3.8094766663156997e-10	4.945778552555794e-10	3.65572044512777e-10	3.7141576086598984e-10	7.087110167279466e-10	5.925026105391153e-10	5.164373917714707e-10	1.962743745789925e-10	4.774372112363868e-10	1.461571560360877e-10	3.6367866715249097e-10	3.658900019807147e-10	2.9888118539786355e-10	3.803594366473984e-10	3.694319518532935e-10	5.282416382220393e-10	3.17471162634397e-10	2.1624656524012314e-10	3.7167354752507764e-10	4.733420508986612e-10	2.898896069114903e-10
TraesCS1A01G050200.1	chr1A	4.202989631565339e-10	1.0785827216599829e-09	1.2095871148275203e-09	1.0049478809838031e-09	1.3047066858695363e-09	9.643866695089662e-10	9.798025149928327e-10	1.8695944269411717e-09	1.5630342304065725e-09	1.3623725986054685e-09	5.177758891888527e-10	1.2594893098501558e-09	3.855656225639501e-10	9.593919005871704e-10	9.652254479335002e-10	7.884547937709264e-10	1.003396118030767e-09	9.745691854879853e-10	1.3935124466638692e-09	8.374955410120941e-10	5.704629442402206e-10	9.804825615700615e-10	1.2486861915633953e-09	7.647348223993219e-10
TraesCS1A01G050300.1	chr1A	0.7970113679679202	2.045312420333004e-09	2.293735565895149e-09	5.717036835946869	2.474110458641528	3.657525741003509	3.7159917624234047	3.54530498738474e-09	2.9639760221043148e-09	2.5834621154945725	9.818565009803427e-10	2.3883649134936287e-09	7.311466620471942e-10	1.8192913077801153e-09	1.8303534420072299e-09	1.495143905224868e-09	1.902736342339825e-09	1.8480719387734366	2.642512491451485e-09	1.5881396925858968e-09	1.0817667683370108e-09	1.8592854500884127e-09	2.3678790002979943e-09	1.450163812814804
TraesCS1A01G050400.1	chr1A	3.234364766575331e-10	8.300115533415499e-10	9.308245532941237e-10	7.733466659274155e-10	1.0040227803084207e-09	7.421332286401664e-10	7.53996324162821e-10	1.4387259718344886e-09	1.2028159207938351e-09	1.0483989536362722e-09	0.7968975613143583	9.692262424498192e-10	2.967078137566269e-10	7.382895587684836e-10	7.427787014157595e-10	6.067467751664043e-10	7.721525236950191e-10	7.499690725999725e-10	1.0723622836050616e-09	6.444855465904692e-10	4.3899352823295533e-10	7.545196465789651e-10	9.609128207622119e-10	5.884933302632056e-10
TraesCS1A01G050500.1	chr1A	1.4572894072425193e-09	3.739736028148383e-09	4.193963450056593e-09	3.484424255510432e-09	4.5237685541661575e-09	3.343787639651856e-09	3.3972385169954643e-09	6.482386094315213e-09	5.419459543802472e-09	4.723711764013543e-09	1.7952680943432902e-09	4.366987765078644e-09	1.3368595852330188e-09	3.326469434090053e-09	3.346695909764912e-09	2.733784567115447e-09	3.479043876512998e-09	3.3790931578093575e-09	4.8316819821121955e-09	2.9038220112744385e-09	1.9779482671624803e-09	3.399596421154886e-09	4.329530452012133e-09	2.651541054639635e-09
TraesCS1A01G050600.1	chr1A	9.397077254853509e-10	2.41150372703018e-09	2.7044043790030145e-09	2.2468703714572365e-09	2.9170734636035046e-09	2.156183296020047e-09	2.190650164525459e-09	4.180053915257117e-09	3.494644218201594e-09	3.046003364567685e-09	1.1576474029025876e-09	2.815976098878951e-09	8.620506495752945e-10	2.145015952404503e-09	2.1580586434146376e-09	1.7628334253742985e-09	2.2434009276495755e-09	2.1789494452831813e-09	3.1156260816240217e-09	1.8724791135292233e-09	1.2754455347204932e-09	2.1921706180081724e-09	2.7918224020980716e-09	1.7098001269364752e-09
TraesCS1A01G050700.1	chr1A	0.981123416495464	2.5177858061850054e-09	2.823595453457555e-09	7.0376897220622565	12.182549969584288	2.251212651011812e-09	2.287198576031901e-09	4.364281215473617e-09	3.6486634922560716e-09	6.36049943010426	12.08668337193933	17.64050681081096	9.000437633103759e-10	2.2395531296381356e-09	2.253170650495222e-09	1.8405266918421626e-09	2.3422742208134624e-09	2.2749821715950535e-09	3.2529409089296397e-09	1.955004788745557e-09	1.3316581798677492e-09	2.288786040382393e-09	2.91486624656744e-09	1.7851560595826116e-09
TraesCS1A01G050800.1	chr1A	9.054406836022945e-10	2.3235667047261343e-09	2.6057865475106182e-09	2.1649368095247147e-09	2.810700518226659e-09	2.0775566961651785e-09	2.110766708315555e-09	4.02762558174143e-09	3.3672097866823213e-09	2.9349289080757353e-09	1.115433051604597e-09	2.713289733421934e-09	8.306154225220579e-10	2.0667965768610005e-09	2.0793636578202748e-09	1.6985505795682229e-09	2.1615938811995208e-09	2.0994926632672447e-09	3.002012788324969e-09	1.8041979677343288e-09	1.2289355993730417e-09	2.1122317174917453e-09	2.6900168166078192e-09	1.6474511742010638e-09
TraesCS1A01G050900.1	chr1A	1.944515684965169e-09	4.990069459246185e-09	5.596162073418888e-09	4.6493974252744615e-09	6.036233341854241e-09	4.461740736041483e-09	4.533062238039129e-09	8.64968987886036e-09	7.231387282844865e-09	6.303025034512046e-09	2.395493270464089e-09	5.827034879306745e-09	1.7838216754765882e-09	4.438632407535823e-09	4.46562134947547e-09	3.6477908531088646e-09	4.642218184624272e-09	4.508850207558871e-09	6.447093729143683e-09	3.874678165646315e-09	2.6392502480511414e-09	4.536208477625345e-09	5.7770541874740215e-09	3.5380502626667423e-09
TraesCS1A01G051000.1	chr1A	1.646465716420393e-10	4.2252054589893745e-10	4.738397879048893e-10	0.3936750693024028	5.111016244569263e-10	3.777857496469708e-10	3.8382470365442255e-10	7.323889415408417e-10	6.122980305800803e-10	5.336914846870696e-10	2.0283187089877011e-10	4.933883141876663e-10	1.5104024388121075e-10	3.758291148436351e-10	3.7811433002444686e-10	3.088667593042956e-10	3.9306718625229746e-10	3.8177461589123836e-10	5.458901091751347e-10	3.280778247882113e-10	2.234713293427643e-10	3.84091102925686e-10	4.891563351801518e-10	2.9957477357953547e-10
TraesCS1A01G051100.1	chr1A	4.4369704976524813e-10	1.1386275329688891e-09	1.2769249542096707e-09	1.0608934331210457e-09	1.3773398415777375e-09	1.0180741748218365e-09	1.034348222013052e-09	1.9736749414306804e-09	1.6500485071508559e-09	1.4382160216206181e-09	5.466005263189537e-10	1.3296052095737727e-09	4.070301005211185e-10	1.0128013465992395e-09	1.0189596481277363e-09	8.323481534241534e-10	1.0592552833644388e-09	1.0288235525151515e-09	1.4710894282307238e-09	8.841190041199839e-10	6.022206751566865e-10	1.0350661268533433e-09	1.3182006805782648e-09	8.073076888009337e-10
TraesCS1A01G051200.1	chr1A	2.0455614936895947e-10	5.249375983744403e-10	5.886963904863977e-10	4.891001093761475e-10	6.349903262026642e-10	4.693592916241358e-10	4.76862060528831e-10	9.09916679271749e-10	7.607162794374193e-10	6.630558654809884e-10	2.5199739093601955e-10	6.12983390345323e-10	1.8765170984100993e-10	4.669283774720829e-10	4.697675183858859e-10	3.8373465248166763e-10	4.883448787374076e-10	4.743150408458636e-10	6.782113808858375e-10	4.0760239258383287e-10	2.7763975993440396e-10	4.771930337679387e-10	6.07725598935797e-10	3.7219033181411866e-10
TraesCS1A01G051300.1	chr1A	1.783367976266398e-10	4.5765277913528554e-10	5.132391735842737e-10	4.2640882463843136e-10	5.535993009656375e-10	4.0919832164800337e-10	4.1573940967651676e-10	7.932864750778011e-10	6.632101043935069e-10	5.780674893530385e-10	2.1969717287129216e-10	5.344131436270274e-10	1.635991149884606e-10	4.07078994282291e-10	4.0955422321156247e-10	3.3454877437352015e-10	4.25750397042889e-10	4.1351885881479155e-10	5.91280419357929e-10	3.55357224031651e-10	2.420527851803809e-10	4.160279598264128e-10	5.29829279072203e-10	3.2448416773628684e-10
TraesCS1A01G051300.2	chr1A	1.783367976266398e-10	4.5765277913528554e-10	5.132391735842737e-10	4.2640882463843136e-10	5.535993009656375e-10	4.0919832164800337e-10	4.1573940967651676e-10	7.932864750778011e-10	6.632101043935069e-10	5.780674893530385e-10	2.1969717287129216e-10	5.344131436270274e-10	1.635991149884606e-10	4.07078994282291e-10	4.0955422321156247e-10	3.3454877437352015e-10	4.25750397042889e-10	4.1351885881479155e-10	5.91280419357929e-10	3.55357224031651e-10	2.420527851803809e-10	4.160279598264128e-10	5.29829279072203e-10	3.2448416773628684e-10
TraesCS1A01G051400.1	chr1A	1.269326007488077e-10	3.257379198721458e-10	3.6530196782836625e-10	3.034997926054112e-10	3.940286019456563e-10	2.912500834380205e-10	2.959057536431362e-10	5.646278096306802e-10	4.720449425687171e-10	4.1144402506055827e-10	1.56371169051136e-10	3.803727054521902e-10	1.164429406720856e-10	2.897416357258933e-10	2.915033991399638e-10	2.38117688405848e-10	3.030311516506603e-10	0.2943252596159032	4.2084843060867143e-10	2.529282640571326e-10	1.7228294973515117e-10	2.9611113145332567e-10	3.771101042550875e-10	2.309541264658589e-10
TraesCS1A01G051500.1	chr1A	15.3101788320169	19.140990057618293	21.465850021316697	51.625416227597135	37.77738738544594	40.534148128428335	13.727363907684612	25.320527259513298	35.03781931949425	27.35846317871285	26.59878815388989	24.116022736107624	11.163935958833175	15.233591552975978	22.989328273274925	27.984511646960755	23.898461022681477	23.211873431402775	22.777509618361208	20.7293514758282	18.382470259419815	27.01588679271245	18.660815959149282	16.785568957077068
TraesCS1A01G051600.1	chr1A	0.8494463258205647	7.266241493288305e-10	8.148797405153821e-10	6.770175198206674e-10	8.789602936384245e-10	6.49692072090251e-10	6.600774837846451e-10	1.259516245518263e-09	1.0529914825900506	9.178089085342103e-10	2.0929046471753376	1.696996123593971	1.8182463045613246	1.2926543509111459	3.9015428638761938	5.311695452772557e-10	6.759721216207273e-10	6.56551872328748e-10	9.387873324893433e-10	5.642075223660424e-10	0.7686237568342934	1.981606861938976	0.841220171999718	1.0303795506953288
TraesCS1A01G051700.1	chr1A	391.08700175317614	290.5561280644075	417.0243769416755	572.4855790302901	580.4107876270497	653.0581356025136	472.19702219051595	644.5723846355181	826.6703196665524	180.13568892043327	232.89667799665287	192.9906451433907	149.12921418295844	206.28392350764526	254.055413798061	731.7063467325426	793.5466772892248	646.7062352420938	724.9583143298562	630.2602002871951	499.79713386093175	193.85631080689004	211.39463609411612	199.3946074026591
TraesCS1A01G051800.1	chr1A	3.859965366153264	3.7145808543093453	4.165752934964977	1.1536621425521085	5.991119491768655	3.321295795649189	3.3743871379610977	2.146260868948682	1.7943352618126425	1.5639793075864004	1.7831923005811186	1.4458711374173503	5.311469025180087	6.6081881594058185	4.432246004174895	3.6205278431536905	2.3037614918772293	2.237575888875956	12.79781834584907	6.730009012143817	5.2390498204036335	3.3767291817794205	11.467754801082947	2.633705577571531
TraesCS1A01G051900.1	chr1A	62.004782636095996	46.799521491555765	52.483779908097624	69.76722916990153	67.93320236710551	25.106744489144713	25.508079042892362	32.44855413805072	27.12791614807803	47.29049292612769	107.83779875623259	87.438444301544	73.61035886030074	58.27899274907842	8.376193726036396	75.26402371053469	87.0743749971401	50.743670140984236	48.37141510984885	58.14206332905652	44.55412283645786	42.54297217154855	54.18028222104439	86.2724572590073
TraesCS1A01G052000.1	chr1A	6.919391290551297e-10	1.7756731623469812e-09	1.991345989683892e-09	1.6544479584042032e-09	2.1479415535858606e-09	1.5876719446578482e-09	1.6130510857759813e-09	3.077917513163601e-09	2.5732267716018167e-09	2.2428770755176843e-09	8.524156117835773e-10	2.07350008566971e-09	6.34757552259622e-10	1.57944904533965e-09	1.5890528274660836e-09	1.2980349016421684e-09	1.651893287561906e-09	1.6044354436329533e-09	2.29414267746592e-09	1.3787707942064057e-09	9.391544291028712e-10	1.6141706479867251e-09	2.0557148877185157e-09	1.2589846593840927e-09
TraesCS1A01G052100.1	chr1A	0.9974186289221025	1.919702272331365	0.7176229471738111	2.3848589348428297	7.740554150234098e-10	0.5721506086701701	0.5812965100556073	1.1091915951261644e-09	0.9273157899981908	8.082674049663961e-10	2.150299869198087	4.483373303018003	0.9149923467072762	0.5691873158653995	5.726482379396894e-10	1.4033216264609871	0.5952941053829567	5.781916836267074e-10	1.6534840626851453	4.968687334857383e-10	0.6768876653465388	1.1633999345883546	1.4816392361532376	0.45370130876013565
TraesCS1A01G052200.1	chr1A	7.581670081132543e-11	1.945628961209317e-10	2.181944578244358e-10	1.8128008751510527e-10	2.3535284433301323e-10	1.7396334989615646e-10	1.7674417651544223e-10	3.3725156074945854e-10	2.8195191754603576e-10	2.45755057129536e-10	9.340032481433677e-11	2.2719619259305213e-10	6.955123855058453e-11	1.7306235576064512e-10	1.7411465508230839e-10	1.4222742962209547e-10	1.8100016879568503e-10	1.7580014902049855e-10	2.513722980711336e-10	1.5107376993477117e-10	1.0290441366447196e-10	1.7686684845233286e-10	2.2524744453803583e-10	1.3794864206756996e-10
TraesCS1A01G052200.2	chr1A	5.635293360757996e-11	1.4461444312759547e-10	1.6217927796570102e-10	1.3474161532743727e-10	1.7493274000485404e-10	1.2930324060455414e-10	1.3137016960797754e-10	2.506718784725593e-10	2.0956883536177505e-10	1.8266448249458794e-10	6.942246558956684e-11	1.68870075063708e-10	5.169594939404917e-11	1.2863355091671554e-10	1.2941570251622346e-10	1.0571460922068288e-10	1.3453355772479559e-10	1.3066849414364048e-10	1.8683965765325617e-10	1.1228990494016903e-10	7.648665174170556e-11	1.3146134903732668e-10	1.6742161227665635e-10	1.0253427786359624e-10
TraesCS1A01G052200.3	chr1A	5.636769470081517e-11	1.446523234497279e-10	1.6222175922248064e-10	0.13477690969481546	0.17497856207977278	1.293371103087202e-10	1.3140458072373967e-10	2.507375394902331e-10	2.0962372984410157e-10	1.8271232964795247e-10	0.06944065018679661	1.689143089085689e-10	0.10341898132442884	1.2866724520229577e-10	1.2944960167867424e-10	1.0574230011631391e-10	1.3456879745876699e-10	1.3070272146245922e-10	1.8688859845243196e-10	1.1231931816943828e-10	7.650668666314319e-11	1.3149578403663798e-10	1.674654667110255e-10	0.20512227150836895
TraesCS1A01G052300.1	chr1A	0.36035680029652567	4.62378749782231e-10	5.185391594683424e-10	0.43081215370770903	5.59316067400393e-10	0.41342392571785386	0.42003256057325355	8.014783811838236e-10	0.6700587720640011	5.84036927562936e-10	2.2196588495508725e-10	5.399317834021321e-10	1.65288528121191e-10	4.1128271261565545e-10	4.137835021004343e-10	0.3380035066824476	0.4301469268312796	0.41778907909753943	5.973863014445167e-10	0.7180536710230383	2.4455235343370884e-10	4.2032409002836017e-10	0.5353005839127428	3.278349671240186e-10
TraesCS1A01G052400.1	chr1A	3.987518266883484e-10	1.0232878693451103e-09	1.147576163295288e-09	9.53428008147697e-10	1.2378193140800543e-09	9.149462164087539e-10	9.295717498634903e-10	1.7737473994945273e-09	1.482903383511115e-09	1.2925289138097588e-09	4.912314797986891e-10	1.1949200617231867e-09	3.6579913295752154e-10	9.102075103779453e-10	9.157419938393182e-10	7.480337018110828e-10	9.519557982058421e-10	9.246067133474646e-10	1.3220723397626331e-09	7.945603156235803e-10	5.412174690259289e-10	9.302169330275567e-10	1.1846707784072732e-09	7.255297635610614e-10
TraesCS1A01G052500.1	chr1A	8.759555053031697e-10	2.2479010318449576e-09	2.520930540536053e-09	2.094436832009663e-09	2.7191716004010965e-09	2.0099022040241147e-09	2.0420307503785493e-09	3.896468167953379e-09	3.2575584503453123e-09	2.839354561001356e-09	1.0791095872375547e-09	2.6249329442738663e-09	8.035668877316518e-10	1.9994924820921213e-09	2.0116503229658838e-09	1.643238213340764e-09	2.091202764308356e-09	2.0311238384118662e-09	2.90425389155455e-09	1.7454452523671324e-09	1.1889159869104192e-09	2.043448052335976e-09	2.6024178972067504e-09	1.5938028320289806e-09
TraesCS1A01G052600.1	chr1A	8.562058453692786e-10	2.1972189130898326e-09	2.4640925840518183e-09	2.0472147814205857e-09	2.657864017898684e-09	1.9645861065859046e-09	1.9959902692692186e-09	3.808616763636127e-09	3.184112172287129e-09	2.7753372831007952e-09	1.0547795302308722e-09	2.5657501060077443e-09	7.854493319074633e-10	1.954411086607286e-09	1.966294811705379e-09	1.606189075904699e-09	2.044053630365064e-09	1.9853292691108032e-09	2.838773366148147e-09	1.7060917121943985e-09	1.1621101887970542e-09	1.9973756161427248e-09	2.5437426926278187e-09	1.5578682854182476e-09
TraesCS1A01G052700.1	chr1A	8.562058453692786e-10	2.1972189130898326e-09	2.4640925840518183e-09	2.0472147814205857e-09	2.657864017898684e-09	1.9645861065859046e-09	1.9959902692692186e-09	3.808616763636127e-09	3.184112172287129e-09	2.7753372831007952e-09	1.0547795302308722e-09	2.5657501060077443e-09	7.854493319074633e-10	1.954411086607286e-09	1.966294811705379e-09	1.606189075904699e-09	2.044053630365064e-09	1.9853292691108032e-09	2.838773366148147e-09	1.7060917121943985e-09	1.1621101887970542e-09	1.9973756161427248e-09	2.5437426926278187e-09	1.5578682854182476e-09
TraesCS1A01G052800.1	chr1A	4.712256988382745e-10	1.2092723069122142e-09	1.3561502250912926e-09	1.1267152884606726e-09	1.462795233208473e-09	1.0812393608509287e-09	1.0985231116999933e-09	2.096129226117985e-09	1.7524237794923323e-09	1.527448402524087e-09	5.805136976599106e-10	1.4120989634524373e-09	4.3228379288921704e-10	1.075639386351747e-09	1.082179772281647e-09	8.839901921402504e-10	1.124975501675371e-09	1.0926556707368944e-09	1.5623614000552577e-09	9.389731029157493e-10	6.395847316445101e-10	1.0992855580814703e-09	1.3999868541907847e-09	8.573961220477068e-10
TraesCS1A01G052800.2	chr1A	8.319319683098402e-10	2.134926624316667e-09	2.3942342891431325e-09	1.9891751871019606e-09	2.5825122029582575e-09	1.9088890777909435e-09	1.9394029162744723e-09	3.700640515182525e-09	3.0938409509078543e-09	2.696655040538659e-09	1.0248759868480382e-09	2.4930097679508237e-09	7.631814384770971e-10	1.899002524873574e-09	1.9105493402395053e-09	1.5606527876702874e-09	1.9861036563083225e-09	1.929044160965909e-09	2.7582926779326068e-09	1.6577231327249695e-09	1.1291637659187871e-09	1.9407489878500184e-09	2.471626276084246e-09	1.5137019165017505e-09
TraesCS1A01G052900.1	chr1A	8.472168076226195e-10	2.1741509979917766e-09	2.4382228456365763e-09	2.025721712849241e-09	2.6299599337212707e-09	1.9439605306637434e-09	1.975034990851694e-09	3.768631285802678e-09	3.1506831731030125e-09	2.746199883803149e-09	1.0437057293885534e-09	2.5388130970207866e-09	7.772031446958364e-10	1.933892335041855e-09	1.9456512966218583e-09	1.5893261984673795e-09	2.0225937497313103e-09	1.964485917204128e-09	2.808969971227957e-09	1.6881799881818589e-09	1.149909556893673e-09	1.9764057934010688e-09	2.51703673260023e-09	1.5415127128679248e-09
TraesCS1A01G053000.1	chr1A	8.642291933178528e-10	2.21780864855386e-09	2.4871831437417284e-09	2.066398855677539e-09	2.6827703741574404e-09	1.9829958826851037e-09	2.0146943280173906e-09	3.844306612826827e-09	3.213949903486607e-09	2.8013444597831316e-09	1.0646636757618175e-09	2.5897932796918865e-09	7.928096335451504e-10	1.972725514460366e-09	1.9847205997668756e-09	1.6212403791594953e-09	2.063208082055232e-09	2.0039334255817205e-09	2.865374990730526e-09	1.7220791847316956e-09	1.1730001102449516e-09	2.0160926567223755e-09	2.567579638877343e-09	1.5724667834074413e-09
TraesCS1A01G053100.1	chr1A	8.373271172612659e-10	2.1487718034626893e-09	2.4097611003567714e-09	2.002075155889911e-09	2.5992600123159633e-09	1.9212683843914036e-09	1.951980107690001e-09	3.7246394809100383e-09	3.113904770304144e-09	2.7141430758210107e-09	1.031522394026041e-09	2.5091771464719057e-09	7.681307344464686e-10	1.911317716344868e-09	1.9229394137819145e-09	1.570773752570873e-09	1.9989837059601275e-09	1.941554174979955e-09	2.776180438489887e-09	1.6684736069968566e-09	1.1364864881361594e-09	1.953334908653196e-09	2.487654980857815e-09	1.5235184010445635e-09
TraesCS1A01G053200.1	chr1A	6.817098283088025e-10	1.7494224503376277e-09	1.9619068726241505e-09	1.6299893824615855e-09	2.1161874017905047e-09	1.5642005537125367e-09	1.5892045016145625e-09	3.0324150367282364e-09	2.535185404334208e-09	2.2097194418775073e-09	8.398139026336616e-10	2.042846441319788e-09	6.253735968935874e-10	1.5560992178478283e-09	1.5655610222025935e-09	1.278845367721376e-09	1.6274724786644754e-09	1.5807162290491502e-09	2.260227157418905e-09	1.3583876990439033e-09	9.252704143114876e-10	1.5903075127472169e-09	2.02532417132141e-09	1.240372425771234e-09
TraesCS1A01G053300.1	chr1A	6.964176994697261e-10	1.7871661925239846e-09	2.0042349604909073e-09	1.665156359429473e-09	2.161844087913277e-09	1.5979481384744037e-09	1.6234915458780916e-09	3.0978393093653074e-09	2.5898819610620228e-09	2.257394079242718e-09	8.579328649342801e-10	2.0869207981983166e-09	6.388660153810436e-10	1.589672016506897e-09	1.5993379590354435e-09	1.3064364220411468e-09	1.662585153500818e-09	1.6148201390609982e-09	2.308991497384793e-09	1.3876948770168031e-09	9.452330985469028e-10	1.6246183544461862e-09	2.0690204856972764e-09	1.2671334274059963e-09
TraesCS1A01G053400.1	chr1A	7.89216634973638e-11	2.0253093648774247e-10	2.2713029442238026e-10	1.8870414977886568e-10	2.449913776889496e-10	1.8108776581488658e-10	1.839824771429084e-10	3.510632077972664e-10	2.934988481545837e-10	2.5581959797775054e-10	9.722539924132977e-11	2.365006821430121e-10	7.239960834452656e-11	1.8014987277529255e-10	1.8124526748482346e-10	1.48052147094394e-10	1.8841276739550832e-10	1.8299978837525004e-10	2.6166688485033037e-10	1.5726077640520493e-10	1.0711871422408053e-10	1.8411017293051521e-10	2.3447212594637834e-10	1.4359812802021496e-10
TraesCS1A01G053500.1	chr1A	8.140973611707894e-10	2.0891589665444307e-09	2.3429077028689418e-09	1.9465320872523603e-09	2.5271493940676014e-09	1.8679671177374175e-09	1.8978268134035193e-09	3.6213077424736944e-09	3.0275164916828437e-09	2.6388452855712474e-09	1.0029051271047639e-09	2.4395656745647404e-09	7.468206762398831e-10	1.8582925085774191e-09	1.8695917881788852e-09	1.5271961705323368e-09	1.9435264026421918e-09	1.887690124728304e-09	2.6991615612556154e-09	1.622185562414346e-09	1.104957228692281e-09	1.899144028463574e-09	2.4186405929903847e-09	1.4812518123648908e-09
TraesCS1A01G053600.1	chr1A	1.6143516064226957e-10	4.1427933495117114e-10	4.6459760149414124e-10	0.38599648580513163	5.01132650536536e-10	3.704170853627838e-10	3.763382503198276e-10	7.181037858918828e-10	6.003552332844449e-10	5.232818983390846e-10	0.19887566056248596	4.837648361915077e-10	1.4809422262021188e-10	3.684986144790931e-10	0.37073925719140843	3.028423513958847e-10	3.854004594386742e-10	3.743281492647025e-10	5.352425901664674e-10	0.32167870774717916	2.1911254872542605e-10	3.7659945350628017e-10	4.796154014106964e-10	0.2937316049962469
TraesCS1A01G053700.1	chr1A	6.567438529078698e-10	1.685354079826789e-09	1.8900567735249957e-09	1.5702949595026669e-09	2.0386871510636906e-09	1.506915487655923e-09	1.5310037263774064e-09	2.921360162544903e-09	2.442340364094095e-09	2.1287938061627665e-09	8.090577475016049e-10	1.9680321260730817e-09	6.024707998557755e-10	1.4991108436438386e-09	1.508226132274523e-09	1.2320107459126582e-09	1.567870231226102e-09	1.5228263162864144e-09	2.1774517986528006e-09	1.3086400328392367	0.8913846217998067	1.5320663423922834e-09	1.9511515668783064e-09	1.1949467825079943e-09
TraesCS1A01G053800.1	chr1A	8.140973611707894e-10	2.0891589665444307e-09	2.3429077028689418e-09	1.9465320872523603e-09	2.5271493940676014e-09	1.8679671177374175e-09	1.8978268134035193e-09	3.6213077424736944e-09	3.0275164916828437e-09	2.6388452855712474e-09	1.0029051271047639e-09	2.4395656745647404e-09	7.468206762398831e-10	1.8582925085774191e-09	1.8695917881788852e-09	1.5271961705323368e-09	1.9435264026421918e-09	1.887690124728304e-09	2.6991615612556154e-09	1.622185562414346e-09	1.104957228692281e-09	1.899144028463574e-09	2.4186405929903847e-09	1.4812518123648908e-09
TraesCS1A01G053900.1	chr1A	1.4961279437571857	1.9197022716914643e-09	2.1528688393685643e-09	1.788644200684961e-09	2.3221662450702295e-09	1.7164518242940584e-09	1.7438895284229324e-09	3.3275747853784935e-09	2.781947367212625e-09	2.4248022148991884e-09	0.9215570875890862	2.241686653377074	1.3724885204040365	1.7075619458886367e-09	1.7179447138190685e-09	1.4033216259932133e-09	1.785882314362988e-09	1.7345750508801221e-09	2.480226092787605e-09	1.4906062004572149e-09	1.0153314975121423e-09	1.745099901009982e-09	2.222458855341086	1.361103926280407
TraesCS1A01G054000.1	chr1A	6.587542933471092	3.7566962841226426	2.1064918483367308	3.5002266348365567	2.2721422556639545e-09	1.6794761064025738	1.7063227489047248	3.2558923353533333e-09	2.722018798532104	2.37256724655102e-09	2.705114850541425	4.386792700447001	2.0143836614137314	6.6831109282099765	1.6809368344964357e-09	2.7461826844391757	3.494821855024641	3.3944178450295115	4.853594374480546	2.916991273555041	0.9934592780376529	11.952549323704448	2.1745827575502914	3.9953492775404853
TraesCS1A01G054100.1	chr1A	1.4739251310694886e-09	3.782427078698022e-09	4.241839745148564e-09	3.524200788107583e-09	4.575409747706867e-09	3.3819587314287036e-09	3.4360197786050014e-09	6.556385935574519e-09	5.4813255203298974e-09	4.77763541428767e-09	1.8157620223609077e-09	4.416839223584108e-09	1.3521205394023455e-09	3.3644428294563777e-09	3.384900200972274e-09	2.7649921534980437e-09	3.5187589892585804e-09	3.4176672806154e-09	4.886838169122609e-09	2.9369706643711794e-09	2.0005275852807734e-09	3.438404599478572e-09	4.378954315619577e-09	2.6818097881400877e-09
TraesCS1A01G054200.1	chr1A	8.140973611707894e-10	2.0891589665444307e-09	2.3429077028689418e-09	1.9465320872523603e-09	2.5271493940676014e-09	1.8679671177374175e-09	1.8978268134035193e-09	3.6213077424736944e-09	3.0275164916828437e-09	2.6388452855712474e-09	1.0029051271047639e-09	2.4395656745647404e-09	7.468206762398831e-10	1.8582925085774191e-09	1.8695917881788852e-09	1.5271961705323368e-09	1.9435264026421918e-09	1.887690124728304e-09	2.6991615612556154e-09	1.622185562414346e-09	1.104957228692281e-09	1.899144028463574e-09	2.4186405929903847e-09	1.4812518123648908e-09
TraesCS1A01G054300.1	chr1A	0.1550382344029816	0.39786336746552275	1.3385632629642503	0.3707012360073779	4.812750887357368e-10	0.35573917527547316	3.6142571158237054e-10	0.6896486653826457	5.765659408992543e-10	0.5025466651178203	0.19099514087160938	4.6459548029054745e-10	0.2844518715438721	0.3538967244897981	3.5604858021754474e-10	0.29084211441959884	0.7402576551709252	3.5949526150565455e-10	5.140334097203898e-10	0.3089320730742002	0.4208602703127254	3.6167656449846653e-10	4.6061046835767896e-10	0.5641847683922548
TraesCS1A01G054400.1	chr1A	0.3821691327925593	0.49036645295192693	1.0998524841435857	0.45688913599612885	0.5931713690980087	0.43844840168903987	0.44545705602530083	4.249958620366494e-10	3.553086544183062e-10	0.9290828676138231	0.5885036006756981	2.863068788106107	0.35058682634677196	0.2180887909983009	0.21941487191186063	0.17923139920722356	0.4561836430563464	0.4430777770187996	0.3167729939642057	0.5711379982640407	0.9077427227093507	0.44576623215173156	0.2838511161994017	0.5215181386400337
TraesCS1A01G054400.2	chr1A	1.1897884397501588e-10	3.053267711886719e-10	3.4241168602563046e-10	2.8448211300979016e-10	3.693382730364187e-10	2.7299998606077634e-10	2.77363926101915e-10	5.292475193110284e-10	4.424660114088638e-10	3.8566242378510865e-10	1.4657275447734568e-10	3.56538072231817e-10	1.0914647922193648e-10	2.7158605958383583e-10	2.7323742868150684e-10	2.2319693387986418e-10	2.8404283768803134e-10	2.758824675469121e-10	3.944775374264104e-10	2.370794601906702e-10	1.614874829253555e-10	2.7755643467961936e-10	3.5347990973855056e-10	2.1648224976140038e-10
TraesCS1A01G054400.3	chr1A	1.1897884397501588e-10	3.053267711886719e-10	3.4241168602563046e-10	2.8448211300979016e-10	3.693382730364187e-10	2.7299998606077634e-10	2.77363926101915e-10	5.292475193110284e-10	4.424660114088638e-10	3.8566242378510865e-10	1.4657275447734568e-10	3.56538072231817e-10	1.0914647922193648e-10	2.7158605958383583e-10	2.7323742868150684e-10	2.2319693387986418e-10	2.8404283768803134e-10	2.758824675469121e-10	3.944775374264104e-10	2.370794601906702e-10	1.614874829253555e-10	2.7755643467961936e-10	3.5347990973855056e-10	2.1648224976140038e-10
TraesCS1A01G054500.1	chr1A	2.0625533783017124e-10	5.292981023864963e-10	5.935865202476265e-10	4.931629217863007e-10	6.402650062286287e-10	4.732581228005662e-10	4.808232150252366e-10	9.174750925819936e-10	7.67035328403992e-10	6.685636777821084e-10	2.5409065999810787e-10	6.180752651533032e-10	1.8921047803777231e-10	4.708070157514036e-10	4.736697405833405e-10	3.8692222467480607e-10	4.924014176662167e-10	4.782550379902701e-10	6.838450856471894e-10	4.109882271548167e-10	2.799460327006322e-10	4.811569375628161e-10	6.127737987991614e-10	3.752820086918078e-10
TraesCS1A01G054600.1	chr1A	5.291632847610132e-10	1.35795332825388e-09	1.5228900068648123e-09	1.265245856714034e-09	1.6426471061439409e-09	1.2141786265293217e-09	1.2335874287122876e-09	2.3538500326079016e-09	1.967885719593849e-09	1.7152494356213112e-09	6.518883326180964e-10	1.5857176884670813e-09	4.85433439555924e-10	1.2078901305753225e-09	1.2152346623162755e-09	9.926775108460188e-10	1.2632921617174248e-09	1.2269985810733978e-09	1.75445501481615e-09	1.054420615569325e-09	7.182221986499827e-10	1.2344436185013234e-09	1.5721163854437502e-09	9.628136780371792e-10
TraesCS1A01G054700.1	chr1A	4.973645665704438e-10	1.276350585878069e-09	1.4313758153891148e-09	1.1892141334292152e-09	1.5439364171768937e-09	1.141215658217082e-09	1.1594581379268033e-09	2.2124014173972572e-09	1.8496306455350504e-09	1.6121758948058548e-09	6.127147656348826e-10	1.4904280276809238e-09	4.5626255489848027e-10	1.135305053391289e-09	1.1422082342263916e-09	9.330250872358576e-10	1.1873778407513546e-09	1.1532652302847037e-09	1.6490255146962272e-09	9.910578975304904e-10	6.750624671440516e-10	1.160262877173817e-09	1.4776440602784093e-09	9.049558453045906e-10
TraesCS1A01G054700.2	chr1A	2.646901219386782e-10	6.792550473430642e-10	7.617571990057691e-10	6.328823063514233e-10	8.216602990961902e-10	6.073382223721903e-10	6.170466023079093e-10	1.1774075603860763e-09	9.843462804036472e-10	8.579763474612543e-10	3.2607780475361936e-10	7.931839196104302e-10	2.4281623462821946e-10	6.041926852406287e-10	6.078664567551686e-10	4.965422563477421e-10	6.319050583416393e-10	6.137508277611912e-10	8.77587174282781e-10	5.27426466172438e-10	3.592583363480848e-10	6.174748727230891e-10	7.863804798037618e-10	4.81604217796375e-10
TraesCS1A01G054800.1	chr1A	3.4933939794828796e-10	8.964843400810246e-10	1.0053711084280688e-09	8.352813556229013e-10	1.084431531112342e-09	8.015681408905695e-10	8.143813111628737e-10	1.5539486146004545e-09	1.2991453343639045e-09	1.1323616403993505e-09	4.303591806245009e-10	1.046848257537792e-09	3.204701278453611e-10	7.974166446438818e-10	8.022653073732988e-10	6.553390493680428e-10	8.339915786229753e-10	8.100315307952086e-10	1.1582441115128263e-09	6.961001899321302e-10	4.741510185892742e-10	8.149465446816096e-10	1.0378690423384066e-09	6.356237484877481e-10
TraesCS1A01G054900.1	chr1A	3.598546306624504e-10	9.234688185450018e-10	1.0356331150362712e-09	8.604236037854634e-10	1.1170732828849542e-09	8.256956100143657e-10	8.388944609972077e-10	1.6007229876151836e-09	1.338250043425025e-09	1.1664461044916385e-09	4.433131358941347e-10	1.0783587402061532e-09	3.301163858741512e-10	8.214191523421924e-10	8.264137614413913e-10	6.750649739309604e-10	8.590950040664762e-10	8.344137507856996e-10	1.1931076466419748e-09	7.170530384585152e-10	4.884231228277473e-10	8.394767082338988e-10	1.0691092476261844e-09	6.547562359004227e-10
TraesCS1A01G054900.2	chr1A	1.9646354455521486e-10	5.041701340443499e-10	5.654065150258889e-10	4.697504398025324e-10	6.098689803699355e-10	4.5079060388489726e-10	4.5799654991752607e-10	8.739187583023858e-10	7.306209914499377e-10	6.368241970353012e-10	2.420279262915635e-10	5.887326780066461e-10	1.802278746981824e-10	4.484558610170096e-10	4.511826804704371e-10	3.6855342764216164e-10	4.690250874300847e-10	4.5555029485987376e-10	6.513801333157952e-10	3.9147691752726004e-10	2.66655837599811e-10	4.5831442926707685e-10	5.836828941696212e-10	3.5746582081721195e-10
TraesCS1A01G055000.1	chr1A	0.12594210067382272	3.23196071102172e-10	3.6245138672943246e-10	3.011314758468828e-10	0.3909538571009827	2.889773555141967e-10	2.935966958698772e-10	5.602218181392196e-10	4.683614080968582e-10	4.082333810881778e-10	1.5515094923801747e-10	3.7740452203079187e-10	1.1553429501721173e-10	2.8748067875573414e-10	2.892286945036785e-10	0.23625957168224923	3.006664918640769e-10	0.8760856044138849	4.1756440071707037e-10	2.509545749111542e-10	0.17093856481256534	2.9380047104401374e-10	3.7416738007049846e-10	2.2915190932605512e-10
TraesCS1A01G055100.1	chr1A	9.479870887054861e-10	2.4327504559026922e-09	2.7282317303598693e-09	2.266666586183732e-09	2.9427745513885575e-09	2.175180505676611e-09	2.2099510470322916e-09	4.2168825841140075e-09	3.5254340351020486e-09	3.072840398616739e-09	1.1678469394920378e-09	2.840786460983611e-09	8.696458094834468e-10	2.1639147713684187e-09	2.177072375955736e-09	1.7783649974040278e-09	2.263166574589219e-09	2.1981472377526363e-09	3.143076531682383e-09	1.8889767268642827e-09	1.2866829403127442e-09	2.2114848965809315e-09	2.8164199563015786e-09	1.724864445235475e-09
TraesCS1A01G055200.1	chr1A	10.973017690119011	10.559722057991717	10.526491833469187	3.27960328407717	2.838568655095783	4.196311401518687	11.724322446759116	6.101339321683156	6.80119144052323	5.928057541023089	7.322201810282091	2.7401920409307747	10.90506282103834	6.261866683629593	5.249951445900755	5.146175198727992	1.0915130586660586	3.180463745202248	4.547666682979846	3.6441732331902967	7.446723080107633	4.266349050844531	9.50840930142182	7.487035542509107
TraesCS1A01G055300.1	chr1A	6.423673705556578e-10	1.6484607566863023e-09	1.8486823963931058e-09	1.5359203434737527e-09	1.994059173627471e-09	1.4739282829510174e-09	1.4974892169442695e-09	2.8574099898324774e-09	2.388876196919896e-09	2.082193344734328e-09	7.913470306408733e-10	1.9249508258008352e-09	5.892823843365446e-10	1.4662944868675558e-09	1.475210236841648e-09	1.2050413564498937e-09	1.5335486938261277e-09	1.4894908148353685e-09	2.129786187140003e-09	1.2799931850692303e-09	8.718717237343074e-10	1.4985285717130493e-09	1.908439791284951e-09	1.168788743487919e-09
TraesCS1A01G055400.1	chr1A	8.776226310609518e-11	2.2521792556684796e-10	2.5257283963772035e-10	2.0984229814996215e-10	2.7243467502659163e-10	2.0137274665113817e-10	2.0459171601807924e-10	3.9038839583763454e-10	3.263758262512908e-10	2.844758444070146e-10	1.081163357523216e-10	2.629928738349428e-10	8.050962428741536e-11	2.0032979327105677e-10	2.0154789124875696e-10	1.6463656378903523e-10	2.0951827586939346e-10	2.0349894900891047e-10	2.909781291565665e-10	1.7487671981981738e-10	1.1911787416435275e-10	2.0473371595590192e-10	2.60737084045864e-10	1.5968361707522548e-10
TraesCS1A01G055400.2	chr1A	8.776226310609518e-11	2.2521792556684796e-10	2.5257283963772035e-10	2.0984229814996215e-10	2.7243467502659163e-10	2.0137274665113817e-10	2.0459171601807924e-10	3.9038839583763454e-10	3.263758262512908e-10	2.844758444070146e-10	1.081163357523216e-10	2.629928738349428e-10	8.050962428741536e-11	2.0032979327105677e-10	2.0154789124875696e-10	1.6463656378903523e-10	2.0951827586939346e-10	2.0349894900891047e-10	2.909781291565665e-10	1.7487671981981738e-10	1.1911787416435275e-10	2.0473371595590192e-10	2.60737084045864e-10	1.5968361707522548e-10
TraesCS1A01G055500.1	chr1A	9.871241703492906e-10	2.533185107751886e-09	2.840865150420598e-09	2.3602445645124185e-09	3.0642652438770763e-09	2.2649815357274806e-09	2.301187558148304e-09	4.390974066944403e-09	3.6709794769181883e-09	3.1997007820458705e-09	1.2160608039664796e-09	2.9580666359783474e-09	9.055486181318462e-10	2.253250702296473e-09	2.266951510742899e-09	1.851783735828965e-09	2.356600057026389e-09	2.288896435641507e-09	3.2728365719811975e-09	1.966962004578863e-09	1.3398028782155639e-09	2.3027847317608785e-09	2.932694174681002e-09	1.7960744452681323e-09
TraesCS1A01G055600.1	chr1A	6.601014390679305e-10	1.6939704094782553e-09	1.899719640465308e-09	1.57832305234266e-09	2.0491098870098243e-09	1.5146195545662292e-09	1.538830943792424e-09	2.936295541699018e-09	2.4548267667735123e-09	2.139677210079754e-09	8.131940345542716e-10	1.978093640010061e-09	6.055509164194554e-10	1.5067750095111385e-09	1.515936899821939e-09	1.2383093693580195e-09	1.5758859277047631e-09	1.5306117269013756e-09	2.1885839653125796e-09	1.3153304202398533e-09	8.959418019969108e-10	1.5398989939444125	1.961126779387909e-09	1.201055917387892e-09
TraesCS1A01G055700.1	chr1A	1.6988926510748316e-09	4.3597448959729824e-09	4.889278443092292e-09	4.062105118924004e-09	5.273761761830547e-09	3.898152432541506e-09	3.9604649027078706e-09	7.557097473109578e-09	6.317948889222355e-09	5.506853451205262e-09	2.09290464682652e-09	5.0909883682364195e-09	1.5584968322584929e-09	3.877963050794456e-09	3.901542863225937e-09	3.187017271663534e-09	4.0558327297243636e-09	3.939311233972488e-09	5.63272399493606e-09	3.385245134196254e-09	2.305871269349944e-09	3.96321372255688e-09	5.047321026950987e-09	3.091138650540417e-09
TraesCS1A01G055800.1	chr1A	2.3064637635170993e-10	5.918910541156604e-10	6.637819965612973e-10	5.514826528014011e-10	7.159805178619535e-10	5.29223981552616e-10	5.376836952586605e-10	1.025972504387867e-09	8.577422572006055e-10	0.7476256925868539	2.8413853726119245e-10	6.911666952232367e-10	0.2115858509647932	5.264830151132167e-10	5.29684275822028e-10	4.3267830054738943e-10	5.506310958539687e-10	5.348118145443177e-10	0.7647142265866874	4.5959026473546863e-10	3.1305147636762374e-10	5.380568826622417e-10	6.852382959061719e-10	4.196615531280309e-10
TraesCS1A01G055900.1	chr1A	0.28833372400804613	7.399299064179248e-10	8.298016116011929e-10	0.6894148935840649	8.950555915567698e-10	6.615890684974419e-10	6.721646552161637e-10	1.282580187486217e-09	1.0722735944191582e-09	0.9346155933678445	3.5520489763022674e-10	8.640355426216343e-10	2.645059384806732e-10	6.58162554400131e-10	6.621644877292792e-10	5.408961872407963e-10	6.883503516280743e-10	6.6857448365768e-10	9.559781679659237e-10	5.745391473848042e-10	3.9134929984501063e-10	6.726311811396224e-10	8.566243815280818e-10	5.246237995557652e-10
TraesCS1A01G056000.1	chr1A	1.7298478226378243e-10	4.439182905867453e-10	4.97836497420973e-10	4.136119896010508e-10	5.369853883964652e-10	3.9691798616446204e-10	4.0326277144399534e-10	7.694793782909002e-10	6.433066929004542e-10	0.5607192694401404	2.1310390294589433e-10	5.183750214174275e-10	0.15868938822359488	3.948622613349125e-10	3.972632068665209e-10	3.245087254105421e-10	4.129733218904765e-10	4.0110886090823833e-10	5.7353566936648e-10	3.4469269855160143e-10	2.347886072757178e-10	4.035426619966813e-10	5.139287219296289e-10	3.1474616484602317e-10
TraesCS1A01G056100.1	chr1A	3.592538716797084e-10	9.219271343738085e-10	1.0339041782832893e-09	8.589871703901622e-10	1.1152083859185353e-09	8.243171532363786e-10	8.374939694095663e-10	1.5980506620932886e-09	1.3360159031188064e-09	1.1644987821135224e-09	4.4257304718646503e-10	1.076558475197462e-09	3.2956527337686554e-10	8.200478348925395e-10	8.250341057461637e-10	6.739379873300741e-10	8.576607887007559e-10	8.330207395156068e-10	1.1911158141767963e-09	7.158559549218567e-10	4.876077252938113e-10	8.380752446141428e-10	1.067324424174388e-09	6.53663153703594e-10
TraesCS1A01G056200.1	chr1A	572.4654176553013	275.4518341543815	335.76972440961026	148.7807176125023	115.89568016843039	107.08177766856497	344.5127300946002	435.9443699014819	248.75972253564842	196.65438108181826	279.793613992122	163.15697662525048	485.199495731059	440.3123348311046	543.0195560997895	90.46521316001808	100.27191279159803	111.81948515106708	154.7302495046061	294.47554059221966	270.2592254025482	203.2221398012444	226.46052415360327	260.40049933510267
TraesCS1A01G056300.1	chr1A	22.743982917703136	17.958840766144405	17.622602520980244	14.641191894148305	27.154870863089577	6.021536279916822	12.23558262829122	15.564753607043704	19.51886649028156	56.71014394478671	42.02824778694354	68.15577924134199	16.852038918719515	21.964614571537197	22.098169606730355	8.205058018118946	8.353476626994917	4.056743278206001	43.5047788255772	19.173881656133787	17.809574845760046	63.261053730658624	67.57118123061481	41.38272339907039
TraesCS1A01G056400.1	chr1A	1.286014357387323e-09	3.300205299740505e-09	3.7010474270419745e-09	3.0749002923002418	3.992090576684478e-09	2.950792678019467e-09	2.9979614801374317e-09	5.72051203143753e-09	4.782511111363536e-09	4.168534484976095e-09	1.5842704497889993e-09	3.85373621499968e-09	1.1797386379645962e-09	2.935509879087437e-09	2.953359142447096	2.412483193689528e-09	3.0701522655284032e-09	2.9819487428477e-09	4.263814976246421e-09	2.562536157359714e-09	1.7454802437310336e-09	3.0000422601028178e-09	3.8206812554609075e-09	2.339905751405097e-09
TraesCS1A01G056500.1	chr1A	3.4266412282825695e-10	8.793540660667376e-10	9.861601955281693e-10	8.193205653880687e-10	1.0637099094987303e-09	7.862515522111318e-10	7.988198848349207e-10	1.5242553289711465e-09	1.2743209012231928e-09	1.1107241568248405e-09	4.221357567909117e-10	1.0268447876485348e-09	3.1434649482920773e-10	7.821793839182025e-10	7.869353970413248e-10	6.42816647150819e-10	8.180554338085235e-10	7.945532212895675e-10	1.136112058426594e-09	6.827989124175034e-10	4.650908080429824e-10	7.993743177131711e-10	1.018037149809647e-09	6.234780717650522e-10
TraesCS1A01G056500.2	chr1A	3.4266412282825695e-10	8.793540660667376e-10	9.861601955281693e-10	8.193205653880687e-10	1.0637099094987303e-09	7.862515522111318e-10	7.988198848349207e-10	1.5242553289711465e-09	1.2743209012231928e-09	1.1107241568248405e-09	4.221357567909117e-10	1.0268447876485348e-09	3.1434649482920773e-10	7.821793839182025e-10	7.869353970413248e-10	6.42816647150819e-10	8.180554338085235e-10	7.945532212895675e-10	1.136112058426594e-09	6.827989124175034e-10	4.650908080429824e-10	7.993743177131711e-10	1.018037149809647e-09	6.234780717650522e-10
TraesCS1A01G056600.1	chr1A	0.3025207159002932	3.8816847714848485e-10	0.43531532573406667	3.616682158367201e-10	4.695476732651377e-10	0.34707074176360597	0.705237424452427	6.728437300331864e-10	0.5625165370912174	4.903009164615743e-10	0.1863410887041662	1.359823510244633	0.13876026168005065	3.452731863406498e-10	3.473726073162736e-10	2.8375505230368863e-10	3.6110975569242224e-10	3.507353019938016e-10	5.015077596241103e-10	0.3014042062513987	0.6159075088882774	1.4114538096983313	0.898773191752749	0.2752185305482641
TraesCS1A01G056700.1	chr1A	2.9277968604590736	3.75669628600099	4.2129836966734615	3.5002266330864434e-09	4.544284511327909e-09	3.358952209446196e-09	3.4126454943968047e-09	19.535354018631782	5.444037591620171e-09	4.74513449310204e-09	1.8034098997598135e-09	4.386792698253604e-09	1.3429224404948466e-09	3.3415554632696e-09	3.3618736689928713e-09	2.746182683066084e-09	3.49482185327723e-09	3.3944178433323027e-09	4.853594372053748e-09	11.667965091303172	1.9869185540883873e-09	3.415014091999126e-09	4.349165510751418e-09	2.663566184139135e-09
TraesCS1A01G056800.1	chr1A	1.5048466373157019e-09	3.861778695733645e-09	4.3308293901516805e-09	3.598135070375575e-09	4.6713973647916266e-09	3.4529089146055304e-09	3.5081041096246873e-09	6.693932493663496e-09	5.596318363413742e-09	4.8778655278741255e-09	1.853854931920927e-09	4.509500186316642e-09	1.3804867045646325e-09	3.43502554615826e-09	3.4559120933003637e-09	2.8229989818931073e-09	3.592579107914355e-09	3.489366597684111	4.989359254583073	2.998585433553792e-09	2.0424966954614892e-09	3.510538961705395e-09	4.470820490073135e-09	2.7380715319472227e-09
TraesCS1A01G056900.1	chr1A	19.592692183329742	2.513965192908098	19.73517550907955	25.76570470204239	18.246095324700573	33.7169482048071	82.21420314195544	30.5036104420989	43.71752190782209	25.403390734076783	63.962214852627326	35.227476420474424	31.45372969594868	6.708464156872998	2.2497515774027956	7.350935135265004	9.354879743129361	6.814589997307396	64.96009463377008	42.944839640617715	30.581661449157426	4.570625843170334	8.731329245283925	1.7824471750834463
TraesCS1A01G057000.1	chr1A	3.068779804194686e-11	7.875186863477366e-11	8.831705130841236e-11	7.337547868950522e-11	9.526213193400238e-11	7.041393375318593e-11	7.153950957974001e-11	1.365069658117431e-10	1.1412371430833744e-10	9.947256317241049e-11	3.7804999087040815e-11	9.196062080761701e-11	2.8151770511870865e-11	7.004924463097843e-11	7.047517649977925e-11	5.7568406295200985e-11	7.32621779386442e-11	7.115740214429553e-11	1.0174621467299059e-10	6.114907786255533e-11	4.165190294970665e-11	7.158916264541591e-11	9.117183962738866e-11	5.5836511251859035e-11
TraesCS1A01G057100.1	chr1A	2.7378253076232055	2.81035294537419	1.5758488636412185	2.6184901543052104	6.799082171320154	1.256401972728643	2.5529714398328736	2.435705718959573	2.036319404499148e-09	1.7748976365993245	2.6982316064220644	1.6408613925906825	1.0046290017885355	1.2498947916046594e-09	1.2574947324074999	1.0271981028262453e-09	1.3072234426093932	1.2696677441954907	1.8154665971804096e-09	1.09108833950888	1.4863970870077938	1.2773716832668486e-09	1.62678709944137e-09	3.985182994059429
TraesCS1A01G057200.1	chr1A	2.1736673650115694e-10	5.578124782726377e-10	6.255642452441317e-10	5.197306212764718e-10	6.747573971365684e-10	4.987535098874655e-10	5.067261491680103e-10	9.669013601958384e-10	8.083570969375405e-10	7.045805762484847e-10	0.2677790459896907	6.513722491346261e-10	1.9940363510378027e-10	4.961703566673042e-10	4.991873023656081e-10	4.0776651960678216e-10	5.189280933654068e-10	5.040196191614631e-10	0.7206852256619993	4.3312900706888097e-10	2.9502730045554845e-10	5.070778500241126e-10	6.45785181899453e-10	3.9549922128126546e-10
TraesCS1A01G057200.2	chr1A	4.002350944875611e-10	1.0270942718349246e-09	1.151844890499114e-09	9.569745475456425e-10	1.242423725663737e-09	9.183496121300509e-10	9.33029549305016e-10	1.7803453439439799e-09	1.4884194531335987e-09	1.297336832893986e-09	4.930587512672521e-10	1.1993648976626405e-09	3.671598240906555e-10	9.135932791704235e-10	9.191483496750503e-10	7.508162202307149e-10	9.554968613113813e-10	9.280460439612803e-10	1.3269901537977078e-09	7.975159026624776e-10	5.432306772182138e-10	9.336771324064566e-10	1.1890774893002945e-09	7.28228572352981e-10
TraesCS1A01G057300.1	chr1A	2.2596402079399235e-10	5.798750649176526e-10	6.503065482586877e-10	5.402869951666508e-10	7.014453865927924e-10	5.184801975378972e-10	5.267681704686701e-10	1.0051442211346307e-09	8.403292187275097e-10	7.324481314168707e-10	2.7837023653975417e-10	6.771353097409307e-10	2.072904432125402e-10	5.157948754994376e-10	5.18931147366418e-10	4.2389449185584284e-10	5.394527256896249e-10	5.239545918479332e-10	7.491897508140367e-10	4.502601158538944e-10	3.0669621363422434e-10	5.271337817891545e-10	0.6713272636189559	4.1114199762175653e-10
TraesCS1A01G057400.1	chr1A	1.8450391752170223e-10	4.734790112802896e-10	5.3098765600888e-10	4.411545999403034e-10	5.727434894242949e-10	4.2334893522885746e-10	4.30116222643324e-10	8.207193597546842e-10	6.861447779092584e-10	5.980578197936552e-10	2.272945886807881e-10	5.52893849651283e-10	1.692565865270727e-10	0.42115631916991125	4.237171443343401e-10	3.4611790889744014e-10	4.4047340305666137e-10	4.2781888222622045e-10	6.117276702131188e-10	3.676459419818738e-10	2.5042328732580136e-10	4.3041475123509985e-10	5.481514690601243e-10	3.3570525498867065e-10
TraesCS1A01G057500.1	chr1A	3.3106626020945436e-09	8.495913130614018e-09	9.527824658333698e-09	7.915897154826264e-09	1.0277074202541579e-08	7.596399612132164e-09	7.717829041174311e-09	1.4726651486059689e-08	1.231190039951023e-08	1.0731304161323074e-08	4.078480850226039e-09	9.92090040989661e-09	3.037070750042191e-09	7.55705620154817e-09	7.6030066052608e-09	6.2105977601648356e-09	7.90367403741158e-09	7.676606507228437e-09	1.0976590349106167e-08	6.59688795381834e-09	4.493492730015276e-09	7.723185715751868e-09	9.835805078160897e-09	6.023757370283889e-09
TraesCS1A01G057600.1	chr1A	1.8620686686138912e-10	4.778491665617921e-10	5.358886092803781e-10	4.4522640472775354e-10	5.78029844100262e-10	4.272563958366808e-10	4.340861445136979e-10	8.282945023887048e-10	6.92477813067348e-10	6.035778227453128e-10	2.293924908549402e-10	5.57996994499521e-10	1.7081880480479588e-10	4.25043541765761e-10	4.2762800346866344e-10	3.4931253626540035e-10	4.4453892047743246e-10	4.3176759991622305e-10	6.17373844267581e-10	3.7103927054934424e-10	2.5273466465329646e-10	4.3438742848907253e-10	5.532108422963297e-10	3.3880377479243104e-10
TraesCS1A01G057700.1	chr1A	4.1015197421120464e-10	1.052543240450911e-09	1.1803848846093207e-09	9.806861151150708e-10	1.273208049234821e-09	9.411041450862594e-10	9.561478164097781e-10	1.8244580938892247e-09	1.5252989694437707e-09	1.3294817734803046e-09	5.052755818259705e-10	1.229082325241321e-09	3.7625717678413426e-10	9.362299614370352e-10	9.419226734598832e-10	7.694196716849702e-10	9.791718153082962e-10	9.51040831581668e-10	1.359869833593204e-09	8.172764618771135e-10	5.566906495253995e-10	9.568114450899712e-10	1.218540019213072e-09	7.462723552765937e-10
TraesCS1A01G057800.1	chr1A	9.35622039722371e-10	2.401018928217005e-09	2.6926460990943057e-09	2.237101369842205e-09	2.9043905355008808e-09	2.1468085860373512e-09	2.18112559859274e-09	4.161879767799478e-09	3.4794501129050652e-09	3.03275987167826e-09	1.1526141533247502e-09	2.803732724535999e-09	8.583026032727932e-10	2.1356897960897e-09	2.1486757797476176e-09	1.755168932220497e-09	2.233647010572838e-09	2.169475752042819e-09	3.1020798812691345e-09	1.8643378999921397e-09	1.2699001193521433e-09	2.1826394414081367e-09	2.77968404382808e-09	1.702366213341099e-09
TraesCS1A01G057900.1	chr1A	3.943672617033818e-10	1.0120360784787622e-09	1.1349577326665065e-09	9.429443770257308e-10	1.224208594682717e-09	9.048857204433552e-10	0.9193504364899006	1.7542437628476726e-09	1.4665977873576635e-09	1.2783166227599264e-09	0.9716600686520825	1.181781050659645e-09	2.5324383472204155	2.700597360647102	9.056727477250189e-10	0.7398085305089858	9.414883550978975e-10	0.9144399941395746	2.6150703960243376	7.858235497828812e-10	1.6057991740593571	9.199885244786894e-10	1.1716444656330943e-09	0.7175520393280336
TraesCS1A01G058000.1	chr1A	5.608854973140192e-10	1.4393597397651899e-09	1.6141840211772987e-09	1.341094652642156e-09	1.741120303645185e-09	1.2869660507087508e-09	1.307538369269323e-09	2.4949583316956033e-09	2.0858562796737575e-09	1.818074988234578e-09	6.90967650559581e-10	1.680778088557636e-09	5.145341409715269e-10	1.2803005728079002e-09	1.288085393593272e-09	1.0521864146239297e-09	1.3390238377891035e-09	1.3005545342393965e-09	1.8596308584497854e-09	1.117630887050023e-09	7.612780906628835e-10	1.3084458858137397e-09	1.66636141636957e-09	1.0205323086058718e-09
TraesCS1A01G058100.1	chr1A	2.1641944599679384e-10	5.55381515410571e-10	6.228380182283174e-10	5.17465620245096e-10	6.718167849465664e-10	4.965799277122937e-10	5.045178220010026e-10	9.626875761923029e-10	8.048342534041217e-10	7.015099937841098e-10	2.666120569205758e-10	6.485335500938113e-10	1.985346283131838e-10	4.940080319483384e-10	4.970118297103104e-10	4.0598946135841196e-10	5.166665897738043e-10	5.018230871302531e-10	7.175444579536382e-10	4.312414183689495e-10	2.937415629745152e-10	5.048679901346344e-10	6.429708314587244e-10	3.937756242726646e-10
TraesCS1A01G058100.2	chr1A	3.7490081731035777e-10	9.620807552089047e-10	1.078934848069147e-09	8.963995035953088e-10	1.1637801797303183e-09	8.602194682728063e-10	8.739701875894256e-10	1.6676521717663415e-09	1.3942047490734583e-09	1.2152173701846686e-09	4.618488767677571e-10	1.123446910528362e-09	3.4391916159014365e-10	8.557642040080682e-10	8.609676469371987e-10	7.0329068712668e-10	8.950153526685588e-10	8.693021306094922e-10	1.2429936806479113e-09	7.470343501710665e-10	5.088449955592212e-10	8.745767796583128e-10	1.1138106795826802e-09	6.821328032551444e-10
TraesCS1A01G058200.1	chr1A	0.2104234706825343	5.399944786407215e-10	6.055820757415485e-10	5.031290564508219e-10	6.532038688056088e-10	4.828220092456885e-10	4.905399814305707e-10	9.360159842834548e-10	7.82536042341752e-10	6.820744170332463e-10	2.5922547776860417e-10	6.305657040188525e-10	1.9303415784166472e-10	4.803213687424685e-10	4.832419452496271e-10	3.947413830613244e-10	5.023521633948039e-10	4.879199051204516e-10	6.976646408330192e-10	4.1929372587828435e-10	2.856033514840218e-10	4.908804480350765e-10	6.251571024254809e-10	3.8286593455194214e-10
TraesCS1A01G058300.1	chr1A	4.414216803896279	2.831971046369977	6.351883108731739	10.554529542406984	13.702765606814463	7.596399614664299	10.290438724138358	4.908883833595448	8.207933603777454	3.577101390684793	10.875948935295598	6.6139336099047075	3.0370707510545483	2.5190187363684093	2.534335535086933e-09	2.070199255458478	10.538232052516666	2.5588688357428125e-09	10.976590352765031	2.1989626534717432	8.986985461528382	7.723185718326263	3.2786016959989013	6.023757372291809
TraesCS1A01G058400.1	chr1A	6.751508130321559	9.355988837971033	6.994909967079941	9.685839438878318	33.95239218388376	10.224394793045759	2.833045381461178	2.402591123613942	6.025903981856255	57.33762074944373	36.09724266431921	56.64935812426523	8.299378655070793	10.479665889508052	10.543387114486862	8.865787432406623	10.315608867389557	10.01924798297477	1.7907844539726514	1.8834453165129528	3.2989248030181657	34.65014298355649	58.570460275498576	29.728206474173394
TraesCS1A01G058400.2	chr1A	1.6510977171571253e-10	4.2370922262653033e-10	4.751728410166422e-10	3.947825946780361e-10	5.125395062648612e-10	3.7884857400659134e-10	3.849045173987188e-10	7.344493707881431e-10	6.140206081597175e-10	5.351929185314576e-10	2.0340249764554416e-10	4.947763631534115e-10	1.5146516528343407e-10	3.768864346040648e-10	3.791780787789913e-10	3.097356939212642e-10	3.941730018657949e-10	3.828486621252034e-10	5.474258614004355e-10	3.2900080588096583e-10	2.241000210621429e-10	3.851716661308477e-10	4.905324783226024e-10	3.0041756706019396e-10
TraesCS1A01G058400.3	chr1A	2.8872057576405907e-10	7.409226567395946e-10	8.309149411337526e-10	6.903398681534532e-10	8.962564711518818e-10	6.624767103603633e-10	6.730664861489225e-10	1.2843010016912521e-09	1.073712244143334e-09	9.358695489525938e-10	3.556814694964569e-10	8.65194803188658e-10	2.648608212246097e-10	6.590455989722242e-10	6.630529016215815e-10	5.416218976887938e-10	6.892738986114751e-10	6.694714977234103e-10	9.572607862592588e-10	5.753099959725297e-10	3.918743659897043e-10	6.735336380016165e-10	8.577736986768224e-10	5.253276776410369e-10
TraesCS1A01G058500.1	chr1A	7.122453744576744e-11	1.8277836059904384e-10	2.0497857550475185e-10	1.703000822143779e-10	2.2109769080931241e-10	1.6342651416215494e-10	1.6603890810116842e-10	3.1682447482145185e-10	2.648742914722523e-10	2.308698490134598e-10	8.774313391373318e-11	2.1343508163391871e-10	6.533856975487946e-11	1.6258009259729626e-10	1.6356865490135216e-10	1.3361281589057183e-10	1.7003711797167456e-10	1.6515205967669299e-10	2.3614685768708103e-10	1.4192333969490033e-10	9.667156689684233e-11	1.6615414988654176e-10	2.1160436785540326e-10	1.295931914392496e-10
TraesCS1A01G058600.1	chr1A	1.1001690651132174e-10	2.8232840157970916e-10	3.166199400775513e-10	0.2630538423201638	3.4151831450163735e-10	0.2524365926801415	0.7694154721526838	4.893825902831698e-10	0.40913779487138985	3.5661286834662564e-10	1.355323390923786e-10	3.296822733350101e-10	0.10092515283750104	2.511291682518564e-10	0.25265615022297927	2.0638489489300324e-10	2.626476546174605e-10	0.25510195473866454	3.647639942187633e-10	2.192217367066422e-10	0.29864726748162723	2.56649832067419e-10	3.268544632313182e-10	2.0017598623131534e-10
TraesCS1A01G058600.2	chr1A	1.1972908149266248e-10	3.0725205127406037e-10	3.445708101585814e-10	2.8627595422684006e-10	3.716671864791558e-10	2.747214251420201e-10	2.791128826092342e-10	5.325847625707789e-10	4.452560418962342e-10	3.8809427141283374e-10	1.474969892051331e-10	3.587862722421809e-10	1.0983471740694127e-10	2.7329858295658263e-10	2.749603649899585e-10	2.2460433294364668e-10	2.858339089939277e-10	2.776220825128979e-10	3.969649699695295e-10	2.3857439743964697e-10	1.6250576453133882e-10	2.79306605076338e-10	3.557088260833411e-10	2.178473084579671e-10
TraesCS1A01G058600.3	chr1A	1.6135446323629995e-10	4.1407224705566947e-10	4.6436536075357935e-10	3.858035354139269e-10	5.008821468371927e-10	3.702319231106654e-10	3.761501282251914e-10	7.17744823739475e-10	6.000551306934504e-10	5.23020322783804e-10	1.9877624738667273e-10	4.835230142289026e-10	1.4802019401605283e-10	3.683144112226677e-10	3.705539335230832e-10	3.0269096806601926e-10	3.852078073719716e-10	3.74141031969394e-10	5.349750357599857e-10	3.2151790827157627e-10	2.190030198332864e-10	3.7641120084269295e-10	4.793756536469321e-10	2.9358477560743776e-10
TraesCS1A01G058700.1	chr1A	5.05543623655784e-10	1.2973399063975987e-09	1.454914493637487e-09	1.2087705130705728e-09	1.569326131163358e-09	1.1599827128941052e-09	1.1785251863970169e-09	2.24878389959408e-09	1.880047437669926e-09	1.6386877928410332e-09	6.227907328066388e-10	1.5149378073060606e-09	4.6376569793126654e-10	1.153974909398507e-09	1.1609916116099109e-09	9.483684911763063e-10	1.2069040229406878e-09	1.1722304376738805e-09	1.6761433970835576e-09	1.0073556389934036e-09	6.861637293288793e-10	1.1793431594139502e-09	1.5019436102125102e-09	9.198376563863418e-10
TraesCS1A01G058800.1	chr1A	4.511385097193823e-10	1.1577240115092478e-09	1.2983408863557449e-09	1.0786861951021113e-09	1.4004398808494815e-09	1.0351487941060603e-09	1.051695781292097e-09	2.0067764079536266e-09	1.67772227666282e-09	1.462337045044025e-09	5.557678307435903e-10	1.3519046680152616e-09	4.138566011587892e-10	1.0297875327057255e-09	1.0360491181172999e-09	8.463078708820007e-10	1.0770205711357501e-09	1.0460784548634139e-09	1.4957617876140483e-09	8.98946995803338e-10	6.123208122662326e-10	1.0524257264651395e-09	1.3403088680932042e-09	8.208474403950793e-10
TraesCS1A01G058900.1	chr1A	2.8527583181990106e-10	7.320826603931655e-10	8.210012409964962e-10	6.821033783434032e-10	8.855631769755228e-10	6.545726576958783e-10	6.650360861816132e-10	1.2689779230144233e-09	1.0609017136122383e-09	9.247036285718071e-10	3.5143781077953056e-10	8.548721077904725e-10	2.6170074956174427e-10	6.511824831205892e-10	6.551419743817306e-10	5.351597716447826e-10	6.810501269532737e-10	6.614839897965291e-10	9.45839645636634e-10	5.684459350395831e-10	3.8719888747369816e-10	6.654976644152075e-10	8.47539544958628e-10	5.190599589948557e-10
TraesCS1A01G058900.2	chr1A	2.8527583181990106e-10	7.320826603931655e-10	8.210012409964962e-10	6.821033783434032e-10	8.855631769755228e-10	6.545726576958783e-10	6.650360861816132e-10	1.2689779230144233e-09	1.0609017136122383e-09	9.247036285718071e-10	3.5143781077953056e-10	8.548721077904725e-10	2.6170074956174427e-10	6.511824831205892e-10	6.551419743817306e-10	5.351597716447826e-10	6.810501269532737e-10	6.614839897965291e-10	9.45839645636634e-10	5.684459350395831e-10	3.8719888747369816e-10	6.654976644152075e-10	8.47539544958628e-10	5.190599589948557e-10
TraesCS1A01G059000.1	chr1A	6.846014924797838e-10	1.756843118207565e-09	1.9702288529958337e-09	1.636903441347955e-09	2.1251638064640593e-09	1.5708355507590376e-09	1.5959455599459075e-09	3.0452778788776666e-09	2.5459391070037065e-09	2.2190925890328734e-09	8.433762097498173e-10	2.051511749660487e-09	6.280262950776536e-10	1.5626998507973419e-09	1.5722017900592325e-09	1.284269950405242e-09	1.6343758613947595e-09	1.587421281982551e-09	2.2698145472700987e-09	1.364149682921078e-09	9.291952092820562e-10	1.5970532498108318e-09	2.0339151540205466e-09	1.2456338146398287e-09
TraesCS1A01G059100.1	chr1A	4.5785759390669227e-10	1.1749667107279693	1.317677878280192e-09	1.0947517341781005e-09	1.4212974975174735	2.10113180866159	1.0673593354815537e-09	2.036664567221021e-09	1.7027096314222099	4.452349600330924	2.2561808964337686	1.3720394197619965	4.2002042287817543e-10	1.04512479383113e-09	1.0514796368977704e-09	8.589124561930092e-10	1.0930613030462824e-09	1.0616583467443583e-09	1.5180390908338317e-09	9.123355680812598e-10	6.214404839382828e-10	1.06810015217845e-09	1.360270915064805e-09	8.330728278052188e-10
TraesCS1A01G059200.1	chr1A	0.7446126963451276	4.777113785470225	1.0714681709198794e-09	1.7803920945362413	2.3114526764678462	8.54266392367804e-10	7.811297559841921	13.248890611952026	2.769112547987203	4.827230246784661	5.962484980460388	3.3470165753887504	2.3907736876584895	1.6996839216132713	1.7100187875053623	2.0952708713422696	2.6664644252750813	8.632861989097723e-10	14.812699780305	12.611697559512221	6.063882923363308	6.079670417247591	3.3183079427001774	6.096709449840172
TraesCS1A01G059300.1	chr1A	1.6807581551898883e-10	4.3132076554796503e-10	4.837088800768214e-10	4.0187449757644406e-10	5.217468027845895e-10	3.8565423701269783e-10	3.918189698070791e-10	7.476430720597865e-10	6.2505091848594e-10	5.44807162576933e-10	2.0705643472899704e-10	5.036645612938921e-10	1.5418609639631017e-10	3.836568495969522e-10	3.859896610325062e-10	3.1529980818332285e-10	4.012539539951206e-10	3.8972618300170413e-10	5.572598589106231e-10	3.34910999998588e-10	2.2812576994349883e-10	3.9209091761822824e-10	4.993444390110324e-10	3.0581428982175435e-10
TraesCS1A01G059400.1	chr1A	1.4739251310694886e-09	3.782427078698022e-09	4.241839745148564e-09	3.524200788107583e-09	4.575409747706867e-09	3.3819587314287036e-09	3.4360197786050014e-09	6.556385935574519e-09	5.4813255203298974e-09	4.77763541428767e-09	1.8157620223609077e-09	4.416839223584108e-09	1.3521205394023455e-09	3.3644428294563777e-09	3.384900200972274e-09	2.7649921534980437e-09	3.5187589892585804e-09	3.4176672806154e-09	4.886838169122609e-09	2.9369706643711794e-09	2.0005275852807734e-09	3.438404599478572e-09	4.378954315619577e-09	2.6818097881400877e-09
TraesCS1A01G059500.1	chr1A	1.0888500715271311e-10	2.794236904148648e-10	3.1336242340615126e-10	2.6034743551882633e-10	3.380046330739767e-10	2.4983942053732033e-10	2.538331359468697e-10	4.843476201352065e-10	4.049284159056325e-10	3.5294388791668057e-10	1.3413792642841586e-10	3.262903659858052e-10	9.9886793094658e-11	2.4854544768120986e-10	2.5005671918128794e-10	2.0426152188094838e-10	2.5994542710326496e-10	2.524773602478572e-10	3.6101115164036143e-10	2.1696629296585874e-10	1.477873304693842e-10	2.5400931262803414e-10	3.234916495600228e-10	1.9811649303514225e-10
TraesCS1A01G059600.1	chr1A	3.4820884973486305e-10	8.935830962619923e-10	1.0021174802454536e-09	8.325781797147365e-10	1.0809220439566386e-09	7.989740692372019e-10	8.117457729390458e-10	1.5489196546826537e-09	1.2949409805310114e-09	1.128697039621359e-09	4.2896643246714004e-10	1.0434603990991583e-09	3.194330076905218e-10	7.948360082534485e-10	7.996689795177217e-10	6.532182110205734e-10	8.31292576750409e-10	8.074100695304991e-10	1.1544957486923966e-09	6.938474385084016e-10	4.726165492734514e-10	8.123091772230931e-10	1.0345102428486382e-09	6.335667137029981e-10
TraesCS1A01G059700.1	chr1A	5.769251183274674e-10	1.4805210549327378e-09	1.660344779602387e-09	1.3794458848892953e-09	1.7909110540622057e-09	1.3237693694064096e-09	1.3449299937703223e-09	2.566306559232922e-09	2.14550543155004e-09	1.870066408809651e-09	7.107272259107039e-10	1.7288432349685783e-09	5.292482540288001e-10	1.3169132790901639e-09	1.3249207220963862e-09	1.0822757490903871e-09	1.3773158510234659e-09	1.3377464422784141e-09	1.912810650648528e-09	1.1495917345796038e-09	7.830483309678096e-10	1.3458634625304866e-09	1.7140142897599419e-09	1.0497164318189083e-09
TraesCS1A01G059800.1	chr1A	2.284427485521713e-10	5.862360440444917e-10	6.574401303521128e-10	5.462137102587124e-10	7.091399396658202e-10	5.241677014740879e-10	5.325465898899471e-10	1.0161702193140975e-09	8.495472674821286e-10	7.404827712165603e-10	2.8142383786060776e-10	6.845631917656897e-10	2.0956432988613846e-10	5.21452922612135e-10	5.246235980275499e-10	4.285444314338793e-10	5.453702892056823e-10	5.297021475263783e-10	7.574080389510625e-10	4.5519927494500233e-10	3.100605386953216e-10	5.329162118087808e-10	6.786914332064314e-10	4.156520478433682e-10
TraesCS1A01G059900.1	chr1A	2.061960482316382e-11	5.29145951793329e-11	5.934158894806833e-11	4.9302115851388467e-11	6.400809573910402e-11	4.731220813075385e-11	4.806849988913701e-11	9.17211357686812e-11	7.668148385143234e-11	6.683714942853491e-11	2.540176197879452e-11	6.178975949183427e-11	1.8915608810828433e-11	4.7067167884694285e-11	4.7353358076778436e-11	3.868110010642764e-11	4.922598732937041e-11	4.781175600975903e-11	6.836485093984806e-11	4.1087008559665797e-11	2.798655601753422e-11	4.810186254979764e-11	6.125976525093024e-11	3.7517413114611085e-11
TraesCS1A01G060000.1	chr1A	1.2937459066301323e-09	3.3200462133661997e-09	3.723298213176495e-09	3.093386663709662e-09	4.016091121233683e-09	2.9685329145606655e-09	3.015985296651284e-09	5.754903887337954e-09	4.8112636831753404e-09	4.193595814545089e-09	1.593795121831819e-09	3.876904969799277e-09	1.1868312550265077e-09	2.9531582350739345e-09	2.971114805663038e-09	2.4269871006656174e-09	3.0886100947800765e-09	2.99987629039989e-09	4.289449134420246e-09	2.5779421863618768e-09	1.7559741129318213e-09	3.0180785863158605e-09	3.8436512830488475e-09	2.3539733210528224e-09
TraesCS1A01G060100.1	chr1A	0.5570139840982147	3.57356139014179e-10	4.0076052812231904e-10	3.3295943597737735e-10	1.7291022174258974	0.3195206915114474	0.649256541752148	1.2388684388341193	1.0357293266198901	0.4513814308780422	0.514648683817415	0.4172941289612629	0.5109825680813499	3.1786582383561117e-10	0.3197985956661869	0.5224618480749251	3.324453057151118e-10	3.228943634403679e-10	1.385096064790238	0.2774791096378278	0.37801168368899674	0.3248535841409913	0.4137148386883859	0.5067440413255716
TraesCS1A01G060200.1	chr1A	5.589430367172607e-10	1.4343749441296394e-09	1.6085937734849098e-09	1.336450168996642e-09	1.7350904497797472e-09	1.282509025424911e-09	1.303010097860598e-09	2.486317783360727e-09	2.0786325349822467e-09	1.8117786246389608e-09	6.885746889992013e-10	1.6749572120604667e-09	5.127522045525778e-10	1.2758666314302107e-09	1.2836244917972779e-09	1.0485424789888685e-09	1.3343865257967603e-09	1.2960504492723336e-09	1.8531905784205222e-09	1.113760303891408e-09	7.586416297428389e-10	1.3039144714905753e-09	1.6605904677414503e-09	1.016997997580397e-09
TraesCS1A01G060300.1	chr1A	1.156951984602932e-09	2.9690019004833934e-09	3.3296161440413457e-09	2.766308145503802e-09	3.5914506621785093e-09	2.6546557784332838e-09	2.6970907939587647e-09	5.146410465558494e-09	4.302545838538522e-09	3.750186938096773e-09	1.4252755659392074e-09	3.4669813260391386e-09	1.0613419287781853e-09	2.6409067371001675e-09	2.6569646738814625e-09	2.1703701850038407e-09	2.7620366259771653e-09	2.682685069730368e-09	3.835905229526349e-09	2.3053640698827535e-09	1.5703065991988868e-09	2.6989627501283412e-09	3.4372437101099912e-09	2.105076500368026e-09
TraesCS1A01G060400.1	chr1A	4.2584380435912667e-10	1.0928120451647318e-09	1.225544728479598e-09	1.0182057685957264e-09	1.321919175129029e-09	9.771094487900872e-10	9.92728669544189e-10	1.894259261069683e-09	1.583654734765498e-09	1.3803458518852238e-09	5.246067056689167e-10	1.2761052638059627e-09	3.9065224027587553e-10	9.72048785819191e-10	9.779592928930447e-10	7.988565720528647e-10	1.0166335338359221e-09	9.874262987529984e-10	1.4118965158810703e-09	8.485442948513037e-10	5.779888406022288e-10	9.934176877121468e-10	1.2651596241697726e-09	7.748236722990491e-10
TraesCS1A01G060500.1	chr1A	2.166373179584002	9.265677071978377e-10	1.0391083949848976	0.8633109321782558	1.1208218520691484	0.8284664014804644	8.41709543081091e-10	1.6060945412648993e-09	1.3427408153828273e-09	1.1703603531644293e-09	4.448007639114138	2.1639547884755332	0.3312241593123356	8.241755924507234e-10	0.829186962812328	6.773302926354267e-10	2.5859336204848944	8.372137969292759e-10	1.1971113635770152e-09	1.4389185141362115	0.9801242536813136	8.422937441675696e-10	1.0726968625511047e-09	6.569534044772698e-10
TraesCS1A01G060600.1	chr1A	1.412955148628663e-10	3.625964238279128e-10	4.0663729664588986e-10	3.3784196655529033e-10	4.386144603842434e-10	3.242061554751088e-10	3.293886327487395e-10	6.285176274418121e-10	5.254586513251248e-10	4.580005059001968e-10	1.7406517088948953e-10	4.2341334644995383e-10	1.2961890922701408e-10	3.2252702107723647e-10	3.2448813482728303e-10	2.6506162469515056e-10	3.373202970661541e-10	3.2762929938926357e-10	4.684690562652009e-10	2.815480741944794e-10	1.9177743102494614e-10	3.296172498515243e-10	4.197815693240042e-10	2.5708747804888564e-10
TraesCS1A01G060600.2	chr1A	2.365625530994636e-10	6.070733090764872e-10	6.808082844906819e-10	5.656284152404256e-10	7.343457198591454e-10	5.427987996943101e-10	5.514755086218361e-10	1.0522891314700035e-09	8.797437075501998e-10	7.668026058842064e-10	2.9142681047785914e-10	7.08895412213206e-10	2.170131169872581e-10	5.399875263106975e-10	5.432709007057003e-10	4.437766812869707e-10	5.647550154984456e-10	5.485299629569606e-10	7.843294679647134e-10	4.713789486971698e-10	3.210813786562766e-10	5.518582684395803e-10	7.028149469554324e-10	4.3042604881105113e-10
TraesCS1A01G060700.1	chr1A	2.575106531603486	4.625816284381666	5.1876667971613175	11.698603494285962	8.793108961490113	10.635565472702513	3.60185878726722	6.872828975493233	1.9152936410888752	6.67763641553913	7.613598077324758	6.945026015677355	0.7086902231220226	1.763413593689392	5.913786550355464	8.21225830720283	4.918121858756793	4.7768273445445955	8.537834536456907	5.644325752782901	4.543679326471862	6.0072645182378	3.825253272088097	3.7483292775498604
TraesCS1A01G060800.1	chr1A	5.33095959874844e-10	1.3680454669444539e-09	1.5342079342486133e-09	1.2746490051124043e-09	1.6548550532581402e-09	1.2232022496827185e-09	1.242755295647391e-09	2.3713435506041617e-09	1.9825107992605244e-09	1.7279969541354248e-09	6.567330848836315e-10	1.597502543294665e-09	4.890411199489904e-10	1.2168670184160971e-09	1.2242661337950917e-09	1.0000549655096144e-09	1.2726807904998005e-09	1.2361174805198557e-09	1.7674939042739083e-09	1.0622569372374703e-09	7.235599358818984e-10	1.2436178485314736e-09	1.5838001570944468e-09	9.699691884437313e-10
TraesCS1A01G060900.1	chr1A	5.41593294805735e-10	1.3898515607967563e-09	1.5586625909186838e-09	1.2949663969724174e-09	1.68123277642249e-09	1.2426996009779969e-09	1.2625643146216365e-09	2.409141811897349e-09	2.014111223074241e-09	1.7555405297466439e-09	6.672011458004007e-10	1.6229660905451672e-09	4.968362384716673e-10	1.2362633886760853e-09	1.2437804429747116e-09	1.0159954389531402e-09	1.2929668098114582e-09	1.255820695393914e-09	1.7956670453655227e-09	1.0791888850625642e-09	7.350931898934387e-10	1.2634406162513544e-09	1.609045293826657e-09	9.854301067159048e-10
TraesCS1A01G061000.1	chr1A	9.041725593955686e-10	2.3203124096214755e-09	2.6021369865197074e-09	2.161904685141627e-09	2.8067639628790027e-09	2.0746469528932387e-09	2.1078104524215557e-09	4.021984649554118e-09	3.3624938065889287e-09	2.930818363386554e-09	1.1138708204398849e-09	2.709489607744873e-09	8.294520955997583e-10	2.0639019037841644e-09	2.0764513837897145e-09	1.6961716571878755e-09	2.1585664387888775e-09	2.0965521973523045e-09	2.997808288621433e-09	1.801671079824337e-09	1.2272144010545923e-09	2.109273409764166e-09	2.686249286052346e-09	1.6451438196153482e-09
TraesCS1A01G061100.1	chr1A	1.533442297882271e-09	3.935161663823595e-09	4.41312543557024e-09	3.6665081833518328e-09	4.7601650106784035e-09	3.518522385666918e-09	3.5747664204964153e-09	6.821133111120284e-09	5.702661705236331e-09	4.970556559282659e-09	1.88908257908332e-09	4.595191401258526e-09	1.4067192310171672e-09	3.50029919074084e-09	3.5215826318903944e-09	2.876642668009841e-09	3.660846644406789e-09	3.5556728477661405e-09	5.084168926545613e-09	3.0555656793220343e-09	2.0813089842113516e-09	3.5772475405501533e-09	4.55577669891063e-09	2.790101394787075e-09
TraesCS1A01G061200.1	chr1A	1.3094912929177201e-09	3.360452455313861e-09	3.768612187373369e-09	3.1310343715844247e-09	4.064968497962693e-09	3.0046611041902077e-09	3.0526910000588047e-09	5.824943285561136e-09	4.869818616439138e-09	4.244633491801216e-09	1.6131922227060397e-09	3.924088397423609e-09	1.2012754487996499e-09	2.98909930892879e-09	3.0072744179023448e-09	2.456524469030716e-09	3.1261996699700976e-09	3.0363859409929925e-09	4.341653383520696e-09	2.6093167362973156e-09	1.7773449946307888e-09	3.0548097658653436e-09	3.890430000489604e-09	2.3826220835808487e-09
TraesCS1A01G061300.1	chr1A	1.286014357387323e-09	3.300205299740505e-09	3.7010474270419745e-09	3.0749002892253417e-09	3.992090576684478e-09	2.950792678019467e-09	2.9979614801374317e-09	5.72051203143753e-09	4.782511111363536e-09	4.168534484976095e-09	1.5842704497889993e-09	3.85373621499968e-09	1.1797386379645962e-09	2.935509879087437e-09	2.953359139493737e-09	2.412483193689528e-09	3.0701522655284032e-09	2.9819487428477e-09	4.263814976246421e-09	2.562536157359714e-09	1.7454802437310336e-09	3.0000422601028178e-09	3.8206812554609075e-09	2.339905751405097e-09
TraesCS1A01G061400.1	chr1A	1.0635571785970939e-09	2.729329588912246e-09	3.060833292215932e-09	2.5429982622588492e-09	3.301531251228349e-09	2.4403590187245014e-09	2.479368472864894e-09	4.730967116608962e-09	3.955223357338542e-09	3.447453560886325e-09	1.3102203719836534e-09	3.187109686869587e-09	9.756652327153664e-10	2.42771986705419e-09	2.4424815288729094e-09	1.995167319987056e-09	2.5390715606182178e-09	2.466125648944885e-09	3.526252253831471e-09	2.119263840188758e-09	1.44354379300326e-09	2.4810893156039776e-09	3.1597726363119854e-09	1.9351444599758786e-09
TraesCS1A01G061500.1	chr1A	9.126084356918803e-11	2.341960786640845e-10	2.6264147701089493e-10	2.1820751274966379e-10	2.832950904008493e-10	2.0940032857870686e-10	2.12747619879699e-10	4.0595095275397793e-10	3.393865674165246e-10	2.958162724707379e-10	1.124263169061461e-10	2.734768984916369e-10	8.371908344051842e-11	2.0831579860077658e-10	2.0958245519166754e-10	1.711996838043742e-10	2.1787057355036163e-10	2.1161129048763718e-10	3.0257776619673495e-10	1.818480564029653e-10	1.2386642385538294e-10	2.1289528054447476e-10	2.7113118324022834e-10	1.6604929137763056e-10
TraesCS1A01G061600.1	chr1A	1.9421757142251386e-10	4.984064562183313e-10	5.589427823029695e-10	0.46438024871682354	6.028969523151648e-10	4.4563716136154393e-10	4.527607289497565e-10	8.639281106442959e-10	7.222685252420261e-10	6.295440166841153e-10	2.3926106070820627e-10	5.820022803639708e-10	1.7816750789958705e-10	4.4332910929659846e-10	4.4602475572378336e-10	3.643401213093089e-10	4.6366318811530033e-10	4.503424395034733e-10	6.439335493609215e-10	3.8700154963735754e-10	2.636074254972861e-10	4.5307497429952293e-10	5.770102257043847e-10	3.53379268112322e-10
TraesCS1A01G061700.1	chr1A	1.0194122383272348	1.4948820761415829	1.6764500869294403	2.437446338344563	3.616565702226233	4.009829707617993	1.697469730803052	5.182399350580829	3.249475179297945	4.72051502744701	1.4352425281181873	4.364032438807346	0.9351684129031851	2.3269527896654365	0.6688862119409651	0.54638689999444	1.3906757840564512	0.6753612766334376	5.311253395211632	0.5803713745264033	1.1859658233688481	0.6794591542181931	0.865320095285525	0.5299493290289532
TraesCS1A01G061700.2	chr1A	3.926880823652287e-10	1.0077269224268453e-09	1.130125187576077e-09	9.389294070505604e-10	1.2189960276737273e-09	9.010328007091071e-10	9.15435926416661e-10	1.7467743550983208e-09	1.4603531495769434e-09	1.2728736687700726e-09	4.837614147165922e-10	1.1767491362103645e-09	3.602364940743475e-10	8.963661552931225e-10	9.018164769013723e-10	7.366584934502086e-10	9.374795847294758e-10	9.105463922807453e-10	1.3019678333793813e-09	7.824775857631243e-10	5.329872763704251e-10	9.160712984012253e-10	1.1666557118256539e-09	7.14496768373089e-10
TraesCS1A01G061800.1	chr1A	4.84669074630958e-10	1.243771066418719e-09	1.39483919547678e-09	1.158858817711052e-09	1.5045266287504565e-09	1.1120855288031323e-09	1.1298623596313742e-09	2.1559287085447745e-09	1.8024178512796509e-09	1.5710242578513508e-09	5.97074899244803e-10	1.4523840690163959e-09	4.446162134070775e-10	1.1063257952716916e-09	1.1130527687881801e-09	9.092091315556629e-10	1.1570693973688123e-09	1.1238275292113703e-09	1.6069332718286056e-09	9.657606238698022e-10	6.578311429076418e-10	1.130646557486197e-09	1.4399264191001313e-09	8.818563717757946e-10
TraesCS1A01G061900.1	chr1A	1.0723907099807907e-09	2.7519984393184943e-09	3.086255495639653e-09	2.564119510284255e-09	3.3289526071355612e-09	2.460627781338492e-09	2.4999612342674265e-09	4.770260863424651e-09	3.988074049675241e-09	3.4760868961096335e-09	1.32110260098684e-09	3.2135806975578727e-09	9.837687645485504e-10	2.4478836533254046e-09	2.4627679203087315e-09	2.011738477129806e-09	2.560160194842622e-09	2.486608420115524e-09	3.555540063248676e-09	2.136865699326539e-09	1.4555333593903304e-09	2.50169636972029e-09	3.186016595085341e-09	1.9512170883809944e-09
[truncated: 136,335 more rows]
