# Supplementary material for: Comparative transcriptome profiling of a resistant vs susceptible bread wheat (Triticum aestivum L.) cultivar in response to water deficit and cold stress
Source: PeerJ. 2021 May 12;9:e11428. doi: 10.7717/peerj.11428 (PMC8123233; doi:10.7717/peerj.11428)
Supplement: Supplemental Information 5 [file peerj-09-11428-s005.xlsx]

## Sheet: S5 - homeoallelic gene sets sep
Table S5
Summary of the separation of homeoallelic gene sets according to expression consistency
The homeoallelic gene sets were divided into seven classes: A- B- or D-dominant if the ratio of corresponding copy expression is greater than 66%, A- B- or D-suppressor if the ratio of corresponding copy expression is less than 16%, and balanced in other cases.
List gene	Line	Stress	balanced	a dominant	b dominant	d dominant	a suppressor	b suppressor	d suppressor
DEGs	Triticum aestivum cv.Yanetzkis Probat	control	0.247749	0.161721	0.145048	0.157052	0.096032	0.107703	0.0846949
	Triticum aestivum cv. Saratovskaya 29	control	0.267089	0.151384	0.138713	0.151384	0.0976992	0.112371	0.0813605
	Triticum aestivum cv.Yanetzkis Probat	water deficit	0.26142	0.156385	0.143048	0.159053	0.0926976	0.107369	0.0800267
	Triticum aestivum cv. Saratovskaya 29	water deficit	0.27009	0.146382	0.148049	0.146716	0.0916972	0.110704	0.0863621
	Triticum aestivum cv.Yanetzkis Probat	cold 6 hour (+4C)	0.251084	0.154718	0.137379	0.155719	0.0980327	0.118706	0.0843615
	Triticum aestivum cv. Saratovskaya 29	cold 6 hour (+4C)	0.240413	0.156052	0.144381	0.166722	0.0963655	0.113038	0.0830277
	Triticum aestivum cv.Yanetzkis Probat	cold 24 hour (+4C)	0.243081	0.166389	0.140714	0.16939	0.0953651	0.102701	0.0823608
	Triticum aestivum cv. Saratovskaya 29	cold 24 hour (+4C)	0.256752	0.151717	0.134712	0.164722	0.09003	0.116706	0.0853618
All gene	Triticum aestivum cv.Yanetzkis Probat	control	0.443828	0.126755	0.126615	0.125729	0.060859	0.063424	0.0527911
	Triticum aestivum cv. Saratovskaya 29	control	0.438138	0.130439	0.12405	0.126755	0.060346	0.0683673	0.0519051
	Triticum aestivum cv.Yanetzkis Probat	water deficit	0.44033	0.126475	0.125449	0.124236	0.0619316	0.0673413	0.0542368
	Triticum aestivum cv. Saratovskaya 29	water deficit	0.427319	0.130952	0.131978	0.127734	0.0616985	0.0666884	0.0536306
	Triticum aestivum cv.Yanetzkis Probat	cold 6 hour (+4C)	0.443688	0.126428	0.119106	0.127221	0.0621182	0.0675279	0.0539104
	Triticum aestivum cv. Saratovskaya 29	cold 6 hour (+4C)	0.462715	0.122464	0.117568	0.122884	0.0583874	0.0644033	0.0515786
	Triticum aestivum cv.Yanetzkis Probat	cold 24 hour (+4C)	0.458238	0.122837	0.120692	0.12363	0.0592734	0.0632841	0.052045
	Triticum aestivum cv. Saratovskaya 29	cold 24 hour (+4C)	0.438465	0.128807	0.120366	0.129086	0.0634706	0.0654759	0.0543301
