# Supplementary material for: Comparative transcriptome profiling of a resistant vs susceptible bread wheat (Triticum aestivum L.) cultivar in response to water deficit and cold stress
Source: PeerJ. 2021 May 12;9:e11428. doi: 10.7717/peerj.11428 (PMC8123233; doi:10.7717/peerj.11428)
Supplement: Supplemental Information 7 [file peerj-09-11428-s007.xlsx]

## Sheet: S7 - SNPs type
Table S7
Summary of identified SNPs the line of Triticum aestivum Yanetzkis Probat (YP) and the line of Saratov 29 (S29) by type of mutation
Bcftools v1.5 SnpEff v4.3 and the genome Triticum aestivum (iwgsc v1) were used to annotate mutations
description of mutations can be found on the site http://www.sequenceontology.org/browser/current_release/term/
Mutation type	Mutation S29	Mutation YP	Mutation S29 and YP
3_prime_UTR_variant	7923	7281	3208
5_prime_UTR_premature_start_codon_gain_variant	8	7	3
5_prime_UTR_variant	77	53	31
conservative_inframe_deletion	1	3	0
conservative_inframe_insertion	1	2	0
disruptive_inframe_deletion	1	2	0
disruptive_inframe_insertion	0	1	0
downstream_gene_variant	2871	2660	1162
frameshift_variant	13	9	5
intergenic_region	3655	3502	1480
intron_variant	315	329	127
missense_variant	653	496	264
missense_variant&splice_region_variant	4	3	1
splice_acceptor_variant&intron_variant	31	34	12
splice_acceptor_variant&splice_donor_variant&intron_variant	1	0	0
splice_donor_variant&intron_variant	33	25	13
splice_region_variant	44	48	17
splice_region_variant&downstream_gene_variant	1	0	0
splice_region_variant&intron_variant	74	80	29
splice_region_variant&stop_retained_variant	1	3	0
splice_region_variant&synonymous_variant	3	1	1
start_lost	2	11	0
stop_gained	14	1	5
stop_lost	3	1	1
stop_lost&splice_region_variant	2	1	0
stop_retained_variant	4	10	1
synonymous_variant	741	588	314
upstream_gene_variant	1501	1321	607
Summ	17977	16472	7281
