# Supplementary material for: Comparative transcriptome profiling of a resistant vs susceptible bread wheat (Triticum aestivum L.) cultivar in response to water deficit and cold stress
Source: PeerJ. 2021 May 12;9:e11428. doi: 10.7717/peerj.11428 (PMC8123233; doi:10.7717/peerj.11428)
Supplement: Supplemental Information 8 [file peerj-09-11428-s008.xlsx]

## Sheet: S8 - SNPs by сhromosome
Table S7
Summary of identified SNPs the line of Triticum aestivum Yanetzkis Probat (YP) and the line of Saratov 29 (S29) by сhromosome
Bcftools v1.5 SnpEff v4.3 and the genome Triticum aestivum (iwgsc v1) were used to annotate mutations
Chromosome	Mutation S29	Mutation YP	Mutation YP and S29	Mutation S29 on 10 MB	Mutation YP on 10 MB	Mutation YP and S29 on 10 MB
1A	895	892	429	1.50648	1.50143	0.722098
1B	1076	1281	551	1.55976	1.85692	0.798722
1D	406	510	148	0.819452	1.02936	0.298716
2A	1333	1092	617	1.70723	1.39857	0.790217
2B	1653	1369	620	2.06301	1.70857	0.773784
2D	975	529	178	1.49574	0.811533	0.273068
3A	735	757	295	0.978899	1.0082	0.392891
3B	1200	1038	450	1.44434	1.24935	0.541627
3D	445	348	127	0.722928	0.565346	0.206319
4A	841	763	255	1.12948	1.02473	0.342471
4B	463	474	199	0.687334	0.703663	0.29542
4D	167	129	70	0.327543	0.253012	0.137293
5A	906	890	447	1.27646	1.25392	0.629778
5B	1184	1064	477	1.66024	1.49197	0.668864
5D	378	372	164	0.667749	0.65715	0.289711
6A	993	1081	469	1.60659	1.74897	0.758802
6B	1189	1073	522	1.64912	1.48823	0.724006
6D	476	515	224	1.00508	1.08743	0.47298
7A	1009	944	421	1.36961	1.28138	0.571463
7B	711	628	253	0.947216	0.836641	0.337055
7D	462	345	175	0.72336	0.540171	0.274
