# Supplementary material for: Comparative transcriptome profiling of a resistant vs susceptible bread wheat (Triticum aestivum L.) cultivar in response to water deficit and cold stress
Source: PeerJ. 2021 May 12;9:e11428. doi: 10.7717/peerj.11428 (PMC8123233; doi:10.7717/peerj.11428)
Supplement: Supplemental Information 9 [file peerj-09-11428-s009.xlsx]

## Sheet: S9 - marker QTL
Table S8
QTL-marker position on chromosome 2A
Сhromosome marker mapping (QTL) - unpublished data by Pshenichnikova et al. 2020, personal communication with the authors
Marker	Chromosome	Centimorgan	Сhromosome position
149 СМ chromosome region
RAC875_c96033_191 f	chr2A	149	753617405
RAC875_c96033_191 r	chr2A	149	753617405
BS00063368_51 f	chr2A	149	754356981
BS00063368_51 r	chr2A	149	754356981
Tdurum_contig53038_714 f	chr2A	149	758420838
Tdurum_contig53038_714 r	chr2A	149	758420838
Tdurum_contig53038_684 f	chr2A	149	758420968
Tdurum_contig53038_684 r	chr2A	149	758420968
RAC875_c27530_860 f	chr2A	149	760571491
RAC875_c27530_860 r	chr2A	149	760571491
BS00065245_51 f	chr2A	149	758389747
BS00065245_51 f	chr2A	149	758391214
wsnp_Ex_c3695_6740339 f	chr2A	149	759830702
wsnp_Ex_c3695_6740339 r	chr2A	149	759830702
RAC875_c1706_1888 f	chr2A	149	755776386
RAC875_c1706_1888 r	chr2A	149	755776386
Excalibur_c4372_363 f	chr2A	149	758396872
Excalibur_c4372_363 r	chr2A	149	758396872
108-115 СМ chromosome region
CAP12_rep_c6956_169 f	chr2A	115.135	697291214
BS00089497_51 f	chr2A	115.135	694753593
RAC875_c52458_454 f	chr2A	115.135	692755001
Kukri_c7193_5892 f	chr2A	115.135	691228505
IAAV2218 f	chr2A	115.135	691223922
GENE-1381_132 f	chr2A	115.135	690932140
Ra_c42714_1137 f	chr2A	109.199	605801445
Ku_c5710_312 f	chr2A	109.199	605800259
Excalibur_c28017_641 f	chr2A	109.199	603560881
Excalibur_c47535_389 f	chr2A	109.199	603548505
wsnp_CAP8_c2677_1394934 f	chr2A	106.299	603524403
wsnp_Ex_c2337_4379619 f	chr2A	108.61	585662192
wsnp_BE406351A_Ta_2_2 f	chr2A	108.463	562602415
wsnp_Ex_c28204_37349164 f	chr2A	108.463	558526726
BS00078116_51 f	chr2A	108.463	555342773
101-104 СМ chromosome region
wsnp_Ex_rep_c66809_65185215 f	chr2A	104.096	503005089
Kukri_c57491_156 f	chr2A	104.132	502335066
GENE-1350_36 f	chr2A	104.096	501850092
Ra_c22880_760 f	chr2A	104.132	498105726
BobWhite_c5096_156_1	chr2A	101.974	165838807
RAC875_rep_c119471_174_1	chr2A	101.974	101994179
