# Supplementary material for: Comparative transcriptome profiling of a resistant vs susceptible bread wheat (Triticum aestivum L.) cultivar in response to water deficit and cold stress
Source: PeerJ. 2021 May 12;9:e11428. doi: 10.7717/peerj.11428 (PMC8123233; doi:10.7717/peerj.11428)
Supplement: Supplemental Information 10 [file peerj-09-11428-s010.xlsx]

## Sheet: S10-list gene high degree
	Table S9
	List of 43 genes with a high degree of similarity of the transcriptional response to stress in evolutionarily distant varieties.
	Gene ID	Otrholog gene	Annotation	Pfam domain	InterPro domain	GO
	TraesCS1A01G317500.1	tr|A0A0E4G9A4|A0A0E4G9A4_TRITD	High molecular weight glutenin subunit		IPR016140: Bifunctional inhibitor/plant lipid transfer protein/seed storage helical domain
	TraesCS1B01G296600.1	tr|A0A061EZD3|A0A061EZD3_THECC	Plant protein 1589 of Uncharacterized protein function	PF09713: Plant protein 1589 of unknown function (A_thal_3526)	IPR006476: Conserved hypothetical protein CHP01589, plant
	TraesCS1B01G344300.1	tr|T1M501|T1M501_TRIUA	E3 ubiquitin-protein ligase		IPR008974: TRAF-like; IPR013010: Zinc finger, SIAH-type; IPR013083: Zinc finger, RING/FYVE/PHD-type	GO:0005515 MF: protein binding;GO:0008270 MF: zinc ion binding
	TraesCS1B01G450500.1	tr|A0A072TTD0|A0A072TTD0_MEDTR	Transmembrane protein, putative	PF14364: Domain of unknown function (DUF4408)	IPR025520: Domain of unknown function DUF4408
	TraesCS1D01G384300.1	tr|M7YKH8|M7YKH8_TRIUA	Cyclopropane-fatty-acyl-phospholipid synthase
	TraesCS2B01G266000.1	tr|A0A0K9P6N2|A0A0K9P6N2_ZOSMR	Transporter	PF00083: Sugar (and other) transporter	IPR003663: Sugar/inositol transporter; IPR005828: Major facilitator, sugar transporter-like; IPR005829: Sugar transporter, conserved site; IPR020846: Major facilitator superfamily domain	GO:0005215 MF: transporter activity;GO:0016020 CC: membrane;GO:0016021 CC: integral component of membrane;GO:0022857 MF: transmembrane transporter activity;GO:0022891 MF: substrate-specific transmembrane transporter activity;GO:0055085 BP: transmembrane transport
	TraesCS2B01G350700.1	AT5G65560.3	Pentatricopeptide repeat (PPR) superfamily protein
	TraesCS2B01G456100.1	AT5G10650.2	RING/U-box superfamily protein	PF13639: Ring finger domain	IPR001841: Zinc finger, RING-type; IPR013083: Zinc finger, RING/FYVE/PHD-type	GO:0005515 MF: protein binding;GO:0008270 MF: zinc ion binding
	TraesCS2D01G453700.1	AT4G17670.1	senescence-associated family protein (DUF581)	PF04570: zinc-finger of the FCS-type, C2-C2	IPR007650: Zf-FLZ domain; IPR013088: Zinc finger, NHR/GATA-type	GO:0006355 BP: regulation of transcription, DNA-templated;GO:0008270 MF: zinc ion binding
	TraesCS2D01G600100.1	tr|A0A1E5VN69|A0A1E5VN69_9POAL	Stem-specific protein TSJT1	PF12481: Aluminium induced protein	IPR024286: Domain of unknown function DUF3700; IPR029055: Nucleophile aminohydrolases, N-terminal
	TraesCS3A01G308100.1	tr|G7IUA3|G7IUA3_MEDTR	Receptor-like kinase, putative	PF12819: Carbohydrate-binding protein of the ER; PF07714: Protein tyrosine kinase	IPR000719: Protein kinase domain; IPR001245: Serine-threonine/tyrosine-protein kinase, catalytic domain; IPR008271: Serine/threonine-protein kinase, active site; IPR011009: Protein kinase-like domain; IPR017441: Protein kinase, ATP binding site; IPR024788: Malectin-like carbohydrate-binding domain	GO:0004672 MF: protein kinase activity;GO:0005524 MF: ATP binding;GO:0006468 BP: protein phosphorylation
	TraesCS3A01G359900.1	tr|A0A1E5V1G7|A0A1E5V1G7_9POAL	Protein CHAPERONE-LIKE PROTEIN OF POR1, chloroplastic	PF11833: Protein CHAPERONE-LIKE PROTEIN OF POR1-like	IPR021788: Protein CHAPERONE-LIKE PROTEIN OF POR1-like
	TraesCS3A01G376800.1	tr|A0A1D1XNL6|A0A1D1XNL6_9ARAE	Polyadenylate-binding protein-interacting protein 2
	TraesCS3D01G083700.1	tr|A0A0K9NY24|A0A0K9NY24_ZOSMR	Chaperone protein dnaJ	PF00226: DnaJ domain	IPR001623: DnaJ domain; IPR018253: DnaJ domain, conserved site
	TraesCS3D01G134400.1	tr|G7IUA3|G7IUA3_MEDTR	Receptor-like kinase, putative	PF12819: Carbohydrate-binding protein of the ER; PF07714: Protein tyrosine kinase	IPR000719: Protein kinase domain; IPR001245: Serine-threonine/tyrosine-protein kinase, catalytic domain; IPR008271: Serine/threonine-protein kinase, active site; IPR011009: Protein kinase-like domain; IPR017441: Protein kinase, ATP binding site; IPR024788: Malectin-like carbohydrate-binding domain	GO:0004672 MF: protein kinase activity;GO:0005524 MF: ATP binding;GO:0006468 BP: protein phosphorylation
	TraesCS3D01G155300.1	sp|B5Z2H6|MUTL_ECO5E	DNA mismatch repair protein MutL
	TraesCS4A01G225500.1	tr|A0A199V3L2|A0A199V3L2_ANACO	PHD finger protein	PF00628: PHD-finger	IPR001965: Zinc finger, PHD-type; IPR011011: Zinc finger, FYVE/PHD-type; IPR013083: Zinc finger, RING/FYVE/PHD-type; IPR019786: Zinc finger, PHD-type, conserved site; IPR019787: Zinc finger, PHD-finger	GO:0005515 MF: protein binding;GO:0008270 MF: zinc ion binding
	TraesCS4B01G229200.1	tr|A0A059Q2G1|A0A059Q2G1_9POAL	Zinc finger protein		IPR013087: Zinc finger C2H2-type	GO:0003676 MF: nucleic acid binding
	TraesCS5A01G106500.1	tr|A0A199V6X7|A0A199V6X7_ANACO	AT-rich interactive domain-containing protein 2
	TraesCS5B01G196900.1	AT1G24706.2	THO2
	TraesCS5B01G556500.1	tr|M8AYZ1|M8AYZ1_TRIUA	Xyloglucan endotransglucosylase/hydrolase	PF00722: Glycosyl hydrolases family 16; PF06955: Xyloglucan endo-transglycosylase (XET) C-terminus	IPR000757: Glycoside hydrolase family 16; IPR008263: Glycoside hydrolase, family 16, active site; IPR010713: Xyloglucan endo-transglycosylase, C-terminal; IPR013320: Concanavalin A-like lectin/glucanase domain; IPR016455: Xyloglucan endotransglucosylase/hydrolase	GO:0004553 MF: hydrolase activity, hydrolyzing O-glycosyl compounds;GO:0005618 CC: cell wall;GO:0005975 BP: carbohydrate metabolic process;GO:0006073 BP: cellular glucan metabolic process;GO:0010411 BP: xyloglucan metabolic process;GO:0016762 MF: xyloglucan:xyloglucosyl transferase activity;GO:0042546 BP: cell wall biogenesis;GO:0048046 CC: apoplast
	TraesCS5D01G143900.1	sp|Q63GK4|THIM_BACCZ	Hydroxyethylthiazole kinase
	TraesCS5D01G234600.1	tr|V5WB75|V5WB75_WHEAT	Zinc-finger homeodomain 1	PF04770: ZF-HD protein dimerisation region	IPR006455: Homeodomain, ZF-HD class; IPR006456: ZF-HD homeobox protein, Cys/His-rich dimerisation domain; IPR009057: Homeobox domain-like	GO:0003677 MF: DNA binding
	TraesCS5D01G368500.1	tr|D7LSC0|D7LSC0_ARALL	BTB/POZ domain-containing protein	PF07707: BTB And C-terminal Kelch	IPR011705: BTB/Kelch-associated
	TraesCS5D01G463600.1	tr|B6TBE4|B6TBE4_MAIZE	F-box domain containing protein		IPR001810: F-box domain	GO:0005515 MF: protein binding
	TraesCS6A01G164100.1	tr|A0A072VNE5|A0A072VNE5_MEDTR	Glucan endo-1,3-beta-glucosidase	PF00332: Glycosyl hydrolases family 17	IPR000490: Glycoside hydrolase family 17; IPR017853: Glycoside hydrolase superfamily	GO:0004553 MF: hydrolase activity, hydrolyzing O-glycosyl compounds;GO:0005975 BP: carbohydrate metabolic process
	TraesCS6A01G217000.1	tr|B9HLQ7|B9HLQ7_POPTR	Octicosapeptide/Phox/Bem1p domain-containing family protein	PF00564: PB1 domain	IPR000270: PB1 domain	GO:0005515 MF: protein binding
	TraesCS6B01G183000.1	tr|A0A060D219|A0A060D219_MAIZE	Trihelix transcription factor		IPR017877: Myb-like domain
	TraesCS6B01G258900.1	tr|G7JNE3|G7JNE3_MEDTR	Senescence regulator	PF04520: Senescence regulator	IPR007608: Senescence regulator S40
	TraesCS6B01G273500.1	tr|A0A0K9NPM4|A0A0K9NPM4_ZOSMR	DNA polymerase alpha catalytic subunit
	TraesCS6D01G151500.1	AT4G26640.7	WRKY family transcription factor family protein
	TraesCS6D01G233500.1	AT5G62900.1	basic-leucine zipper transcription factor K
	TraesCS7A01G161900.1	tr|M7YPK3|M7YPK3_TRIUA	DEAD-box ATP-dependent RNA helicase 18
	TraesCS7A01G528700.1	tr|M8BZ56|M8BZ56_AEGTA	Chaperone protein dnaJ	PF00226: DnaJ domain	IPR001623: DnaJ domain; IPR018253: DnaJ domain, conserved site
	TraesCS7A01G528800.1	tr|M8BZ56|M8BZ56_AEGTA	Chaperone protein dnaJ	PF00226: DnaJ domain	IPR001623: DnaJ domain; IPR018253: DnaJ domain, conserved site
	TraesCS7A01G528900.1	tr|M8BZ56|M8BZ56_AEGTA	Chaperone protein dnaJ	PF00226: DnaJ domain	IPR001623: DnaJ domain; IPR018253: DnaJ domain, conserved site
	TraesCS7B01G008300.1	tr|B9SSY6|B9SSY6_RICCO	Thiopurine S-methyltransferase, putative	PF05724: Thiopurine S-methyltransferase (TPMT)	IPR008854: TPMT family; IPR029063: S-adenosyl-L-methionine-dependent methyltransferase	GO:0008757 MF: S-adenosylmethionine-dependent methyltransferase activity
	TraesCS7B01G127100.1	tr|B9SXA3|B9SXA3_RICCO	Chaperone protein DNAj, putative	PF00226: DnaJ domain	IPR001623: DnaJ domain
	TraesCS7B01G445500.1	tr|M8BZ56|M8BZ56_AEGTA	Chaperone protein dnaJ	PF00226: DnaJ domain	IPR001623: DnaJ domain; IPR018253: DnaJ domain, conserved site
	TraesCS7D01G205400.1	tr|B9S3B2|B9S3B2_RICCO	Heat-shock protein, putative	PF00011: Hsp20/alpha crystallin family	IPR002068: Alpha crystallin/Hsp20 domain; IPR008978: HSP20-like chaperone
	TraesCS7D01G516600.1	tr|M8BZ56|M8BZ56_AEGTA	Chaperone protein dnaJ	PF00226: DnaJ domain	IPR001623: DnaJ domain
	TraesCSU01G122500.1	sp|Q2IIK1|LON_ANADE	Lon protease	PF02190: ATP-dependent protease La (LON) substrate-binding domain	IPR003111: Lon, substrate-binding domain; IPR015947: PUA-like domain
	TraesCSU01G130400.1	AT4G17840.1	CAAX protease self-immunity protein	PF02517: CAAX protease self-immunity	IPR003675: CAAX amino terminal protease	GO:0016020 CC: membrane
